# Supplementary material for: Mechanisms of simultaneous linear and nonlinear computations at the mammalian cone photoreceptor synapse
Source: PubMed Central journal article supplement (PMC10276006; doi:10.1038/s41467-023-38943-2), 2023-06-16
Supplement: 41467_2023_38943_MOESM3_ESM.pdf [file 41467_2023_38943_MOESM3_ESM.pdf]

## **Description of Additional Supplementary Files**

Supplementary Movie 1

Description: 3D STED image corresponding to Fig. 7a showing labels for PSD95 (red), EAAT5 (cyan), GluA4 (yellow), and GluK1 (magenta).
