# Supplementary material for: Mechanisms of simultaneous linear and nonlinear computations at the mammalian cone photoreceptor synapse
Source: Nat Commun. 2023 Jun 16;14:3486. doi: 10.1038/s41467-023-38943-2 (PMC10276006; doi:10.1038/s41467-023-38943-2)
Supplement: Supplementary file 5 — Source Data [file 41467_2023_38943_MOESM5_ESM.xlsx]

## Sheet: Figure 1
3D image files (TIF) and mesh surface fits (STL) are deposited at:
https://doi.org/10.5061/dryad.0p2ngf25g

## Sheet: Figure 2a-b
Fig 2a	msec	dCm fF	S.E.	Fig 2b	interpoint interval = 60 µs
	0	0	0		cb2_(pA)	cone_(pA)	membV_(mV)
	1	15.3857	2.13212		-70.132	-172.395	-70
	3	19.3	1.32611		-70.288	-172.022	-70
	9	22.5286	2.21324		-70.444	-171.738	-70
	15	25.5714	2.0234		-70.56	-171.688	-70
	30	25.7286	2.45713		-70.629	-171.891	-70
	1000	25.7286	1.47155e-07		-70.665	-172.232	-70
					-70.651	-172.569	-70
					-70.539	-172.819	-70
					-70.319	-172.968	-70
					-70.069	-173.035	-70
					-69.907	-173.057	-70
					-69.888	-173.069	-70
					-69.969	-173.075	-70
					-70.054	-173.039	-70
					-70.091	-172.915	-70
					-70.105	-172.689	-70
					-70.16	-172.404	-70
					-70.264	-172.126	-70
					-70.351	-171.897	-70
					-70.354	-171.707	-70
					-70.269	-171.521	-70
					-70.148	-171.352	-70
					-70.025	-171.289	-70
					-69.897	-171.453	-70
					-69.749	-171.897	-70
					-69.599	-172.545	-70
					-69.501	-173.231	-70
					-69.508	-173.803	-70
					-69.61	-174.192	-70
					-69.736	-174.405	-70
					-69.813	-174.462	-70
					-69.821	-174.355	-70
					-69.788	-174.088	-70
					-69.758	-173.716	-70
					-69.774	-173.352	-70
					-69.857	-173.111	-70
					-69.983	-173.042	-70
					-70.058	-173.083	-70
					-69.968	-173.101	-70
					-69.678	-172.993	-70
					-69.286	-172.777	-70
					-68.97	-172.572	-70
					-68.853	-172.48	-70
					-68.924	-172.494	-70
					-69.079	-172.501	-70
					-69.231	-172.4	-70
					-69.367	-172.178	-70
					-69.506	-171.902	-70
					-69.64	-171.653	-70
					-69.747	-171.488	-70
					-69.832	-171.425	-70
					-69.935	-171.432	-70
					-70.078	-171.432	-70
					-70.223	-171.343	-70
					-70.294	-171.148	-70
					-70.243	-170.925	-70
					-70.097	-170.806	-70
					-69.945	-170.881	-70
					-69.874	-171.144	-70
					-69.916	-171.518	-70
					-70.029	-171.933	-70
					-70.125	-172.369	-70
					-70.133	-172.827	-70
					-70.045	-173.264	-70
					-69.918	-173.573	-70
					-69.829	-173.644	-70
					-69.816	-173.445	-70
					-69.853	-173.042	-70
					-69.867	-172.579	-70
					-69.806	-172.227	-70
					-69.7	-172.119	-70
					-69.64	-172.293	-70
					-69.679	-172.67	-70
					-69.758	-173.113	-70
					-69.748	-173.517	-70
					-69.565	-173.853	-70
					-69.253	-174.121	-70
					-68.947	-174.304	-70
					-68.773	-174.38	-70
					-68.772	-174.372	-70
					-68.91	-174.33	-70
					-69.128	-174.266	-70
					-69.379	-174.136	-70
					-69.62	-173.898	-70
					-69.797	-173.581	-70
					-69.876	-173.276	-70
					-69.878	-173.071	-70
					-69.883	-172.984	-70
					-69.964	-172.982	-70
					-70.126	-173.034	-70
					-70.299	-173.141	-70
					-70.392	-173.316	-70
					-70.348	-173.548	-70
					-70.169	-173.78	-70
					-69.909	-173.924	-70
					-69.651	-173.917	-70
					-69.468	-173.775	-70
					-69.377	-173.59	-70
					-69.338	-173.477	-70
					-69.309	-173.506	-70
					-69.301	-173.679	-70
					-69.369	-173.931	-70
					-69.547	-174.17	-70
					-69.815	-174.306	-70
					-70.114	-174.272	-70
					-70.378	-174.052	-70
					-70.553	-173.7	-70
					-70.622	-173.321	-70
					-70.619	-173.036	-70
					-70.622	-172.925	-70
					-70.698	-172.99	-70
					-70.837	-173.14	-70
					-70.943	-173.258	-70
					-70.908	-173.28	-70
					-70.709	-173.234	-70
					-70.43	-173.178	-70
					-70.185	-173.118	-70
					-70.037	-172.997	-70
					-69.986	-172.768	-70
					-70.005	-172.476	-70
					-70.05	-172.246	-70
					-70.055	-172.171	-70
					-69.957	-172.06	-70
					-69.744	-170.641	-70
					-69.494		-70
					-69.35		-70
					-69.453		-70
					-69.827		-20
					-70.308		-20
					-70.613		-20
					-70.566		-20
					-70.283		-20
					-70.094		-20
					-70.251		-20
					-70.718		-20
					-71.238		-20
					-71.565		-20
					-71.615		-20
					-71.466		-20
					-71.296		-20
					-71.396		-20
					-72.364		-20
					-75.522		-20
					-83.446		-70
					-100.212		-70
					-130.76		-70
					-179.117		-70
					-246.127		-70
					-328.081		-70
					-417.313		-70
					-504.522		-70
					-581.519		-70
					-643.078		-70
					-687.342	-564.321	-70
					-715.143	-501.536	-70
					-728.916	-474.676	-70
					-731.753	-466.789	-70
					-726.763	-468.703	-70
					-716.631	-475.53	-70
					-703.326	-484.582	-70
					-688.006	-494.416	-70
					-671.197	-504.343	-70
					-653.148	-514.082	-70
					-634.13	-523.481	-70
					-614.514	-532.371	-70
					-594.657	-540.563	-70
					-574.757	-547.927	-70
					-554.801	-554.439	-70
					-534.654	-560.16	-70
					-514.262	-565.195	-70
					-493.827	-569.641	-70
					-473.787	-573.571	-70
					-454.598	-577.047	-70
					-436.495	-580.136	-70
					-419.404	-582.92	-70
					-403.078	-585.46	-70
					-387.328	-587.788	-70
					-372.176	-589.933	-70
					-357.81	-591.924	-70
					-344.421	-593.754	-70
					-332.069	-595.358	-70
					-320.688	-596.657	-70
					-310.171	-597.639	-70
					-300.395	-598.394	-70
					-291.188	-599.065	-70
					-282.331	-599.783	-70
					-273.633	-600.636	-70
					-265.001	-601.685	-70
					-256.43	-602.964	-70
					-247.939	-604.456	-70
					-239.552	-606.048	-70
					-231.318	-607.535	-70
					-223.33	-608.688	-70
					-215.7	-609.376	-70
					-208.506	-609.633	-70
					-201.745	-609.625	-70
					-195.332	-609.549	-70
					-189.162	-609.526	-70
					-183.194	-609.576	-70
					-177.497	-609.655	-70
					-172.227	-609.731	-70
					-167.531	-609.823	-70
					-163.451	-609.982	-70
					-159.903	-610.252	-70
					-156.749	-610.644	-70
					-153.866	-611.15	-70
					-151.175	-611.758	-70
					-148.623	-612.449	-70
					-146.187	-613.156	-70
					-143.877	-613.728	-70
					-141.707	-613.976	-70
					-139.622	-613.788	-70
					-137.48	-613.264	-70
					-135.136	-612.685	-70
					-132.557	-612.324	-70
					-129.841	-612.251	-70
					-127.138	-612.341	-70
					-124.555	-612.426	-70
					-122.14	-612.433	-70
					-119.922	-612.392	-70
					-117.952	-612.358	-70
					-116.294	-612.334	-70
					-114.97	-612.244	-70
					-113.898	-611.987	-70
					-112.913	-611.546	-70
					-111.873	-611.027	-70
					-110.753	-610.605	-70
					-109.63	-610.416	-70
					-108.596	-610.513	-70
					-107.695	-610.881	-70
					-106.944	-611.461	-70
					-106.373	-612.164	-70
					-106.05	-612.897	-70
					-106.045	-613.605	-70
					-106.368	-614.284	-70
					-106.931	-614.941	-70
					-107.576	-615.543	-70
					-108.135	-616.032	-70
					-108.468	-616.399	-70
					-108.472	-616.72	-70
					-108.115	-617.091	-70
					-107.467	-617.54	-70
					-106.671	-617.997	-70
					-105.848	-618.367	-70
					-105.057	-618.621	-70
					-104.336	-618.805	-70
					-103.748	-618.978	-70
					-103.345	-619.142	-70
					-103.082	-619.241	-70
					-102.815	-619.221	-70
					-102.412	-619.082	-70
					-101.865	-618.881	-70
					-101.271	-618.677	-70
					-100.735	-618.493	-70
					-100.31	-618.314	-70
					-100.011	-618.104	-70
					-99.844	-617.838	-70
					-99.781	-617.533	-70
					-99.739	-617.249	-70
					-99.6	-617.063	-70
					-99.264	-617.027	-70
					-98.702	-617.149	-70
					-97.982	-617.4	-70
					-97.237	-617.721	-70
					-96.59	-618.024	-70
					-96.09	-618.217	-70
					-95.722	-618.264	-70
					-95.448	-618.225	-70
					-95.236	-618.213	-70
					-95.056	-618.296	-70
					-94.874	-618.445	-70
					-94.663	-618.57	-70
					-94.44	-618.599	-70
					-94.293	-618.524	-70
					-94.356	-618.405	-70
					-94.719	-618.333	-70
					-95.335	-618.399	-70
					-96.022	-618.669	-70
					-96.565	-619.173	-70
					-96.844	-619.872	-70
					-96.89	-620.635	-70
					-96.825	-621.295	-70
					-96.769	-621.759	-70
					-96.791	-622.069	-70
					-96.875	-622.325	-70
					-96.93	-622.556	-70
					-96.847	-622.682	-70
					-96.587	-622.605	-70
					-96.218	-622.319	-70
					-95.869	-621.939	-70
					-95.654	-621.644	-70
					-95.628	-621.569	-70
					-95.768	-621.744	-70
					-95.985	-622.094	-70
					-96.169	-622.501	-70
					-96.255	-622.849	-70
					-96.245	-623.05	-70
					-96.187	-623.059	-70
					-96.146	-622.877	-70
					-96.173	-622.534	-70
					-96.269	-622.05	-70
					-96.376	-621.449	-70
					-96.421	-620.843	-70
					-96.376	-620.446	-70
					-96.269	-620.444	-70
					-96.122	-620.827	-70
					-95.919	-621.366	-70
					-95.625	-621.779	-70
					-95.221	-621.912	-70
					-94.691	-621.819	-70
					-94.021	-621.701	-70
					-93.237	-621.776	-70
					-92.447	-622.15	-70
					-91.798	-622.767	-70
					-91.382	-623.459	-70
					-91.19	-624.037	-70
					-91.124	-624.37	-70
					-91.037	-624.43	-70
					-90.802	-624.284	-70
					-90.372	-624.053	-70
					-89.821	-623.863	-70
					-89.312	-623.814	-70
					-89.018	-623.96	-70
					-89.034	-624.279	-70
					-89.313	-624.657	-70
					-89.696	-624.934	-70
					-90.024	-625.007	-70
					-90.269	-624.896	-70
					-90.551	-624.703	-70
					-91.009	-624.518	-70
					-91.647	-624.377	-70
					-92.289	-624.318	-70
					-92.697	-624.413	-70
					-92.733	-624.703	-70
					-92.441	-625.128	-70
					-91.98	-625.542	-70
					-91.482	-625.807	-70
					-90.977	-625.867	-70
					-90.437	-625.758	-70
					-89.869	-625.552	-70
					-89.349	-625.322	-70
					-88.968	-625.133	-70
					-88.765	-625.047	-70
					-88.711	-625.101	-70
					-88.724	-625.27	-70
					-88.695	-625.469	-70
					-88.551	-625.597	-70
					-88.286	-625.589	-70
					-87.946	-625.441	-70
					-87.582	-625.218	-70
					-87.202	-625.027	-70
					-86.796	-624.96	-70
					-86.383	-625.039	-70
					-86.06	-625.206	-70
					-85.962	-625.375	-70
					-86.172	-625.498	-70
					-86.668	-625.577	-70
					-87.372	-625.647	-70
					-88.211	-625.741	-70
					-89.11	-625.894	-70
					-89.968	-626.158	-70
					-90.693	-626.579	-70
					-91.264	-627.169	-70
					-91.719	-627.867	-70
					-92.103	-628.566	-70
					-92.425	-629.142	-70
					-92.667	-629.504	-70
					-92.821	-629.617	-70
					-92.903	-629.516	-70
					-92.942	-629.296	-70
					-92.94	-629.034	-70
					-92.852	-628.738	-70
					-92.623	-628.36	-70
					-92.252	-627.894	-70
					-91.806	-627.434	-70
					-91.375	-627.111	-70
					-90.999	-626.974	-70
					-90.645	-626.952	-70
					-90.235	-626.929	-70
					-89.72	-626.869	-70
					-89.124	-626.861	-70
					-88.52	-627.053	-70
					-87.985	-627.534	-70
					-87.588	-628.25	-70
					-87.392	-629.028	-70
					-87.415	-629.701	-70
					-87.58	-630.225	-70
					-87.736	-630.675	-70
					-87.758	-631.129	-70
					-87.638	-631.554	-70
					-87.476	-631.839	-70
					-87.407	-631.916	-70
					-87.518	-631.82	-70
					-87.806	-631.623	-70
					-88.182	-631.344	-70
					-88.528	-630.963	-70
					-88.768	-630.497	-70
					-88.91	-630.028	-70
					-89.018	-629.643	-70
					-89.14	-629.367	-70
					-89.245	-629.162	-70
					-89.232	-628.985	-70
					-88.996	-628.853	-70
					-88.502	-628.846	-70
					-87.803	-629.051	-70
					-87.009	-629.483	-70
					-86.24	-630.069	-70
					-85.586	-630.71	-70
					-85.087	-631.341	-70
					-84.736	-631.938	-70
					-84.487	-632.471	-70
					-84.282	-632.875	-70
					-84.081	-633.042	-70
					-83.89	-632.889	-70
					-83.767	-632.438	-70
					-83.787	-631.843	-70
					-83.974	-631.296	-70
					-84.278	-630.904	-70
					-84.626	-630.666	-70
					-84.982	-630.545	-70
					-85.348	-630.522	-70
					-85.706	-630.578	-70
					-85.997	-630.658	-70
					-86.164	-630.694	-70
					-86.21	-630.651	-70
					-86.183	-630.557	-70
					-86.132	-630.46	-70
					-86.089	-630.377	-70
					-86.072	-630.282	-70
					-86.097	-630.153	-70
					-86.169	-630.004	-70
					-86.273	-629.854	-70
					-86.366	-629.695	-70
					-86.391	-629.487	-70
					-86.297	-629.2	-70
					-86.058	-628.847	-70
					-85.69	-628.5	-70
					-85.258	-628.265	-70
					-84.859	-628.221	-70
					-84.575	-628.385	-70
					-84.425	-628.701	-70
					-84.371	-629.078	-70
					-84.377	-629.438	-70
					-84.438	-629.736	-70
					-84.543	-629.95	-70
					-84.638	-630.074	-70
					-84.644	-630.139	-70
					-84.51	-630.209	-70
					-84.253	-630.332	-70
					-83.936	-630.494	-70
					-83.624	-630.656	-70
					-83.36	-630.819	-70
					-83.169	-631.02	-70
					-83.048	-631.252	-70
					-82.971	-631.419	-70
					-82.914	-631.4	-70
					-82.881	-631.156	-70
					-82.903	-630.774	-70
					-83	-630.413	-70
					-83.138	-630.221	-70
					-83.225	-630.266	-70
					-83.145	-630.509	-70
					-82.836	-630.802	-70
					-82.334	-630.963	-70
					-81.752	-630.881	-70
					-81.205	-630.598	-70
					-80.758	-630.272	-70
					-80.437	-630.045	-70
					-80.254	-629.958	-70
					-80.204	-629.973	-70
					-80.248	-630.06	-70
					-80.334	-630.236	-70
					-80.439	-630.533	-70
					-80.584	-630.928	-70
					-80.789	-631.316	-70
					-81.02	-631.566	-70
					-81.221	-631.624	-70
					-81.378	-631.568	-70
					-81.54	-631.558	-70
					-81.754	-631.735	-70
					-81.988	-632.127	-70
					-82.144	-632.63	-70
					-82.137	-633.064	-70
					-81.968	-633.262	-70
					-81.721	-633.152	-70
					-81.51	-632.788	-70
					-81.417	-632.313	-70
					-81.457	-631.893	-70
					-81.584	-631.638	-70
					-81.733	-631.574	-70
					-81.857	-631.662	-70
					-81.939	-631.844	-70
					-81.975	-632.073	-70
					-81.961	-632.316	-70
					-81.908	-632.562	-70
					-81.843	-632.814	-70
					-81.795	-633.056	-70
					-81.772	-633.23	-70
					-81.743	-633.256	-70
					-81.649	-633.097	-70
					-81.459	-632.787	-70
					-81.225	-632.415	-70
					-81.066	-632.081	-70
					-81.068	-631.857	-70
					-81.206	-631.77	-70
					-81.36	-631.803	-70
					-81.42	-631.928	-70
					-81.357	-632.13	-70
					-81.217	-632.386	-70
					-81.075	-632.64	-70
					-80.984	-632.814	-70
					-80.955	-632.828	-70
					-80.972	-632.622	-70
					-81.012	-632.184	-70
					-81.059	-631.574	-70
					-81.092	-630.929	-70
					-81.088	-630.389	-70
					-81.049	-630.011	-70
					-81.002	-629.738	-70
					-80.976	-629.466	-70
					-80.972	-629.145	-70
					-80.972	-628.823	-70
					-80.957	-628.599	-70
					-80.936	-628.537	-70
					-80.943	-628.617	-70
					-80.999	-628.758	-70
					-81.087	-628.873	-70
					-81.159	-628.924	-70
					-81.168	-628.933	-70
					-81.084	-628.954	-70
					-80.882	-629.041	-70
					-80.557	-629.219	-70
					-80.16	-629.481	-70
					-79.808	-629.792	-70
					-79.639	-630.1	-70
					-79.711	-630.361	-70
					-79.963	-630.552	-70
					-80.259	-630.682	-70
					-80.48	-630.77	-70
					-80.587	-630.836	-70
					-80.608	-630.91	-70
					-80.576	-631.026	-70
					-80.484	-631.205	-70
					-80.312	-631.42	-70
					-80.07	-631.62	-70
					-79.826	-631.762	-70
					-79.676	-631.832	-70
					-79.675	-631.832	-70
					-79.788	-631.762	-70
					-79.907	-631.631	-70
					-79.922	-631.466	-70
					-79.799	-631.313	-70
					-79.586	-631.21	-70
					-79.353	-631.15	-70
					-79.133	-631.077	-70
					-78.923	-630.938	-70
					-78.716	-630.752	-70
					-78.526	-630.6	-70
					-78.397	-630.553	-70
					-78.364	-630.592	-70
					-78.414	-630.617	-70
					-78.474	-630.539	-70
					-78.468	-630.368	-70
					-78.383	-630.205	-70
					-78.272	-630.145	-70
					-78.211	-630.183	-70
					-78.259	-630.224	-70
					-78.43	-630.161	-70
					-78.656	-629.975	-70
					-78.795	-629.74	-70
					-78.714	-629.549	-70
					-78.381	-629.432	-70
					-77.893	-629.334	-70
					-77.425	-629.178	-70
					-77.136	-628.938	-70
					-77.086	-628.66	-70
					-77.218	-628.435	-70
					-77.411	-628.34	-70
					-77.576	-628.379	-70
					-77.699	-628.477	-70
					-77.819	-628.528	-70
					-77.979	-628.458	-70
					-78.187	-628.224	-70
					-78.424	-627.797	-70
					-78.644	-627.188	-70
					-78.785	-626.478	-70
					-78.812	-625.808	-70
					-78.779	-625.315	-70
					-78.811	-625.083	-70
					-78.992	-625.143	-70
					-79.268	-625.48	-70
					-79.502	-626.014	-70
					-79.611	-626.598	-70
					-79.643	-627.085	-70
					-79.705	-627.399	-70
					-79.826	-627.542	-70
					-79.915	-627.547	-70
					-79.846	-627.438	-70
					-79.564	-627.23	-70
					-79.12	-626.94	-70
					-78.604	-626.602	-70
					-78.074	-626.284	-70
					-77.543	-626.061	-70
					-77.03	-625.964	-70
					-76.604	-625.95	-70
					-76.361	-625.946	-70
					-76.358	-625.926	-70
					-76.561	-625.927	-70
					-76.864	-625.988	-70
					-77.139	-626.087	-70
					-77.306	-626.163	-70
					-77.346	-626.172	-70
					-77.28	-626.126	-70
					-77.138	-626.061	-70
					-76.955	-626.021	-70
					-76.778	-626.034	-70
					-76.655	-626.09	-70
					-76.612	-626.143	-70
					-76.652	-626.15	-70
					-76.763	-626.107	-70
					-76.918	-626.033	-70
					-77.046	-625.925	-70
					-77.033	-625.75	-70
					-76.79	-625.478	-70
					-76.341	-625.112	-70
					-75.822	-624.683	-70
					-75.385	-624.219	-70
					-75.085	-623.737	-70
					-74.851	-623.251	-70
					-74.575	-622.799	-70
					-74.247	-622.437	-70
					-73.992	-622.21	-70
					-73.979	-622.104	-70
					-74.268	-622.043	-70
					-74.758	-621.953	-70
					-75.259	-621.837	-70
					-75.613	-621.793	-70
					-75.759	-621.926	-70
					-75.733	-622.258	-70
					-75.624	-622.694	-70
					-75.505	-623.101	-70
					-75.387	-623.391	-70
					-75.245	-623.555	-70
					-75.08	-623.621	-70
					-74.961	-623.604	-70
					-74.991	-623.509	-70
					-75.237	-623.354	-70
					-75.669	-623.158	-70
					-76.148	-622.93	-70
					-76.504	-622.693	-70
					-76.645	-622.499	-70
					-76.598	-622.416	-70
					-76.424	-622.462	-70
					-76.15	-622.571	-70
					-75.793	-622.631	-70
					-75.434	-622.577	-70
					-75.184	-622.448	-70
					-75.081	-622.341	-70
					-75.05	-622.314	-70
					-74.979	-622.33	-70
					-74.83	-622.274	-70
					-74.659	-622.036	-70
					-74.546	-621.593	-70
					-74.519	-621.021	-70
					-74.544	-620.437	-70
					-74.59	-619.948	-70
					-74.666	-619.656	-70
					-74.806	-619.636	-70
					-75.027	-619.882	-70
					-75.31	-620.246	-70
					-75.593	-620.503	-70
					-75.795	-620.481	-70
					-75.84	-620.163	-70
					-75.695	-619.685	-70
					-75.4	-619.249	-70
					-75.046	-618.998	-70
					-74.728	-618.941	-70
					-74.491	-618.977	-70
					-74.331	-618.98	-70
					-74.231	-618.879	-70
					-74.189	-618.664	-70
					-74.204	-618.356	-70
					-74.252	-617.992	-70
					-74.283	-617.629	-70
					-74.261	-617.343	-70
					-74.189	-617.21	-70
					-74.107	-617.281	-70
					-74.067	-617.575	-70
					-74.095	-618.08	-70
					-74.163	-618.737	-70
					-74.216	-619.438	-70
					-74.221	-620.057	-70
					-74.191	-620.51	-70
					-74.157	-620.777	-70
					-74.138	-620.883	-70
					-74.125	-620.865	-70
					-74.089	-620.746	-70
					-74.003	-620.528	-70
					-73.864	-620.217	-70
					-73.7	-619.845	-70
					-73.548	-619.475	-70
					-73.431	-619.179	-70
					-73.34	-618.999	-70
					-73.267	-618.945	-70
					-73.227	-619.012	-70
					-73.252	-619.194	-70
					-73.339	-619.482	-70
					-73.424	-619.841	-70
					-73.418	-620.201	-70
					-73.284	-620.471	-70
					-73.066	-620.596	-70
					-72.847	-620.596	-70
					-72.68	-620.546	-70
					-72.572	-620.491	-70
					-72.517	-620.407	-70
					-72.521	-620.236	-70
					-72.573	-619.959	-70
					-72.604	-619.613	-70
					-72.523	-619.254	-70
					-72.309	-618.915	-70
					-72.055	-618.6	-70
					-71.903	-618.304	-70
					-71.919	-618.031	-70
					-72.042	-617.797	-70
					-72.16	-617.606	-70
					-72.23	-617.426	-70
					-72.314	-617.202	-70
					-72.498	-616.91	-70
					-72.802	-616.591	-70
					-73.168	-616.316	-70
					-73.498	-616.122	-70
					-73.678	-616.01	-70
					-73.627	-615.975	-70
					-73.345	-616.033	-70
					-72.931	-616.192	-70
					-72.525	-616.419	-70
					-72.209	-616.633	-70
					-71.973	-616.717	-70
					-71.767	-616.544	-70
					-71.59	-616.03	-70
					-71.488	-615.193	-70
					-71.49	-614.167	-70
					-71.56	-613.159	-70
					-71.619	-612.366	-70
					-71.604	-611.894	-70
					-71.499	-611.705	-70
					-71.34	-611.623	-70
					-71.2	-611.432	-70
					-71.174	-611.024	-70
					-71.324	-610.481	-70
					-71.628	-610.014	-70
					-71.971	-609.82	-70
					-72.215	-609.936	-70
					-72.287	-610.22	-70
					-72.207	-610.438	-70
					-72.043	-610.424	-70
					-71.856	-610.17	-70
					-71.662	-609.809	-70
					-71.445	-609.522	-70
					-71.185	-609.429	-70
					-70.91	-609.531	-70
					-70.706	-609.721	-70
					-70.678	-609.864	-70
					-70.868	-609.877	-70
					-71.209	-609.756	-70
					-71.554	-609.527	-70
					-71.762	-609.208	-70
					-71.781	-608.822	-70
					-71.678	-608.43	-70
					-71.581	-608.131	-70
					-71.588	-607.999	-70
					-71.71	-608.017	-70
					-71.882	-608.072	-70
					-72.022	-608.035	-70
					-72.073	-607.847	-70
					-72.022	-607.564	-70
					-71.882	-607.295	-70
					-71.679	-607.13	-70
					-71.446	-607.089	-70
					-71.228	-607.144	-70
					-71.076	-607.242	-70
					-71.046	-607.325	-70
					-71.179	-607.329	-70
					-71.48	-607.201	-70
					-71.912	-606.906	-70
					-72.401	-606.443	-70
					-72.871	-605.85	-70
					-73.301	-605.204	-70
					-73.732	-604.621	-70
					-74.216	-604.223	-70
					-74.762	-604.067	-70
					-75.319	-604.095	-70
					-75.793	-604.171	-70
					-76.083	-604.189	-70
					-76.119	-604.136	-70
					-75.916	-604.071	-70
					-75.572	-604.047	-70
					-75.223	-604.062	-70
					-74.974	-604.089	-70
					-74.86	-604.115	-70
					-74.83	-604.145	-70
					-74.79	-604.153	-70
					-74.663	-604.082	-70
					-74.422	-603.898	-70
					-74.09	-603.617	-70
					-73.711	-603.273	-70
					-73.328	-602.885	-70
					-72.974	-602.486	-70
					-72.671	-602.158	-70
					-72.427	-602.015	-70
					-72.242	-602.12	-70
					-72.116	-602.422	-70
					-72.065	-602.794	-70
					-72.108	-603.107	-70
					-72.244	-603.278	-70
					-72.426	-603.269	-70
					-72.576	-603.061	-70
					-72.607	-602.66	-70
					-72.478	-602.115	-70
					-72.228	-601.526	-70
					-71.964	-601.02	-70
					-71.799	-600.705	-70
					-71.787	-600.623	-70
					-71.902	-600.739	-70
					-72.061	-600.977	-70
					-72.175	-601.267	-70
					-72.2	-601.558	-70
					-72.147	-601.806	-70
					-72.045	-601.969	-70
					-71.901	-602.014	-70
					-71.727	-601.916	-70
					-71.581	-601.649	-70
					-71.545	-601.221	-70
					-71.649	-600.724	-70
					-71.822	-600.305	-70
					-71.93	-600.057	-70
					-71.855	-599.962	-70
					-71.553	-599.931	-70
					-71.061	-599.894	-70
					-70.484	-599.798	-70
					-69.974	-599.589	-70
					-69.68	-599.224	-70
					-69.696	-598.732	-70
					-70.011	-598.235	-70
					-70.507	-597.887	-70
					-71.003	-597.769	-70
					-71.344	-597.854	-70
					-71.49	-598.056	-70
					-71.522	-598.315	-70
					-71.557	-598.602	-70
					-71.651	-598.871	-70
					-71.761	-599.053	-70
					-71.794	-599.12	-70
					-71.691	-599.129	-70
					-71.483	-599.152	-70
					-71.272	-599.176	-70
					-71.146	-599.13	-70
					-71.123	-598.984	-70
					-71.171	-598.79	-70
					-71.26	-598.622	-70
					-71.39	-598.511	-70
					-71.57	-598.439	-70
					-71.819	-598.342	-70
					-72.181	-598.125	-70
					-72.71	-597.725	-70
					-73.405	-597.183	-70
					-74.173	-596.637	-70
					-74.875	-596.22	-70
					-75.425	-595.966	-70
					-75.833	-595.829	-70
					-76.15	-595.755	-70
					-76.383	-595.725	-70
					-76.478	-595.717	-70
					-76.36	-595.658	-70
					-75.996	-595.458	-70
					-75.415	-595.08	-70
					-74.703	-594.564	-70
					-73.984	-593.993	-70
					-73.384	-593.459	-70
					-72.975	-593.033	-70
					-72.746	-592.743	-70
					-72.622	-592.542	-70
					-72.534	-592.344	-70
					-72.468	-592.098	-70
					-72.453	-591.847	-70
					-72.495	-591.697	-70
					-72.544	-591.74	-70
					-72.521	-591.977	-70
					-72.377	-592.3	-70
					-72.117	-592.551	-70
					-71.805	-592.598	-70
					-71.526	-592.398	-70
					-71.347	-592.011	-70
					-71.283	-591.557	-70
					-71.312	-591.151	-70
					-71.395	-590.86	-70
					-71.491	-590.704	-70
					-71.557	-590.678	-70
					-71.558	-590.751	-70
					-71.482	-590.861	-70
					-71.346	-590.939	-70
					-71.181	-590.958	-70
					-71	-590.946	-70
					-70.789	-590.952	-70
					-70.539	-590.992	-70
					-70.278	-591.035	-70
					-70.059	-591.016	-70
					-69.914	-590.871	-70
					-69.82	-590.568	-70
					-69.731	-590.132	-70
					-69.652	-589.672	-70
					-69.655	-589.339	-70
					-69.815	-589.238	-70
					-70.129	-589.327	-70
					-70.492	-589.431	-70
					-70.751	-589.36	-70
					-70.785	-589.034	-70
					-70.589	-588.525	-70
					-70.279	-587.986	-70
					-70.012	-587.551	-70
					-69.873	-587.29	-70
					-69.848	-587.226	-70
					-69.881	-587.357	-70
					-69.931	-587.654	-70
					-69.969	-588.057	-70
					-69.969	-588.493	-70
					-69.937	-588.89	-70
					-69.925	-589.162	-70
					-69.998	-589.227	-70
					-70.187	-589.047	-70
					-70.468	-588.65	-70
					-70.762	-588.091	-70
					-70.955	-587.423	-70
					-70.957	-586.707	-70
					-70.773	-586.034	-70
					-70.519	-585.503	-70
					-70.34	-585.176	-70
					-70.301	-585.041	-70
					-70.359	-585.024	-70
					-70.433	-585.046	-70
					-70.48	-585.061	-70
					-70.504	-585.059	-70
					-70.513	-585.032	-70
					-70.516	-584.95	-70
					-70.532	-584.78	-70
					-70.566	-584.528	-70
					-70.576	-584.267	-70
					-70.492	-584.112	-70
					-70.297	-584.154	-70
					-70.078	-584.403	-70
					-69.98	-584.765	-70
					-70.102	-585.094	-70
					-70.421	-585.286	-70
					-70.797	-585.348	-70
					-71.039	-585.378	-70
					-71.007	-585.47	-70
					-70.702	-585.648	-70
					-70.255	-585.857	-70
					-69.839	-585.996	-70
					-69.579	-585.96	-70
					-69.529	-585.677	-70
					-69.693	-585.133	-70
					-69.999	-584.386	-70
					-70.283	-583.543	-70
					-70.37	-582.718	-70
					-70.222	-581.99	-70
					-69.988	-581.385	-70
					-69.887	-580.897	-70
					-70.023	-580.519	-70
					-70.328	-580.245	-70
					-70.644	-580.04	-70
					-70.845	-579.807	-70
					-70.899	-579.432	-70
					-70.849	-578.878	-70
					-70.759	-578.247	-70
					-70.668	-577.723	-70
					-70.575	-577.456	-70
					-70.465	-577.477	-70
					-70.324	-577.7	-70
					-70.151	-577.972	-70
					-69.959	-578.148	-70
					-69.778	-578.166	-70
					-69.642	-578.059	-70
					-69.564	-577.892	-70
					-69.538	-577.694	-70
					-69.553	-577.45	-70
					-69.607	-577.142	-70
					-69.692	-576.797	-70
					-69.773	-576.494	-70
					-69.785	-576.339	-70
					-69.667	-576.417	-70
					-69.424	-576.745	-70
					-69.159	-577.244	-70
					-69.05	-577.785	-70
					-69.239	-578.252	-70
					-69.721	-578.589	-70
					-70.308	-578.789	-70
					-70.733	-578.848	-70
					-70.821	-578.755	-70
					-70.594	-578.504	-70
					-70.217	-578.108	-70
					-69.885	-577.579	-70
					-69.728	-576.95	-70
					-69.782	-576.308	-70
					-70	-575.785	-70
					-70.287	-575.491	-70
					-70.548	-575.424	-70
					-70.709	-575.489	-70
					-70.743	-575.573	-70
					-70.675	-575.611	-70
					-70.572	-575.596	-70
					-70.492	-575.533	-70
					-70.448	-575.405	-70
					-70.41	-575.17	-70
					-70.339	-574.824	-70
					-70.215	-574.443	-70
					-70.053	-574.15	-70
					-69.89	-574.007	-70
					-69.756	-573.971	-70
					-69.639	-573.96	-70
					-69.505	-573.949	-70
					-69.371	-573.971	-70
					-69.318	-574.04	-70
					-69.422	-574.116	-70
					-69.666	-574.141	-70
					-69.945	-574.11	-70
					-70.145	-574.08	-70
					-70.211	-574.108	-70
					-70.155	-574.192	-70
					-70.025	-574.259	-70
					-69.875	-574.211	-70
					-69.755	-573.984	-70
					-69.707	-573.582	-70
					-69.762	-573.069	-70
					-69.937	-572.516	-70
					-70.224	-571.935	-70
					-70.572	-571.281	-70
					-70.883	-570.523	-70
					-71.071	-569.725	-70
					-71.127	-569.025	-70
					-71.11	-568.532	-70
					-71.06	-568.234	-70
					-70.939	-568.023	-70
					-70.68	-567.81	-70
					-70.298	-567.599	-70
					-69.918	-567.454	-70
					-69.691	-567.408	-70
					-69.67	-567.436	-70
					-69.779	-567.496	-70
					-69.891	-567.558	-70
					-69.926	-567.573	-70
					-69.89	-567.433	-70
					-69.845	-567.038	-70
					-69.844	-566.431	-70
					-69.887	-565.839	-70
					-69.918	-565.533	-70
					-69.874	-565.624	-70
					-69.747	-565.995	-70
					-69.604	-566.412	-70
					-69.522	-566.692	-70
					-69.525	-566.775	-70
					-69.58	-566.69	-70
					-69.646	-566.479	-70
					-69.702	-566.165	-70
					-69.724	-565.788	-70
					-69.678	-565.416	-70
					-69.551	-565.116	-70
					-69.38	-564.916	-70
					-69.249	-564.809	-70
					-69.245	-564.791	-70
					-69.417	-564.86	-70
					-69.748	-564.996	-70
					-70.175	-565.154	-70
					-70.618	-565.283	-70
					-71	-565.334	-70
					-71.258	-565.265	-70
					-71.358	-565.068	-70
					-71.305	-564.789	-70
					-71.151	-564.513	-70
					-70.982	-564.311	-70
					-70.875	-564.202	-70
					-70.854	-564.162	-70
					-70.871	-564.15	-70
					-70.829	-564.118	-70
					-70.661	-564.02	-70
					-70.392	-563.83	-70
					-70.131	-563.577	-70
					-69.993	-563.356	-70
					-70.015	-563.281	-70
					-70.148	-563.403	-70
					-70.32	-563.657	-70
					-70.497	-563.908	-70
					-70.691	-564.04	-70
					-70.883	-564.026	-70
					-70.994	-563.915	-70
					-70.926	-563.779	-70
					-70.675	-563.652	-70
					-70.369	-563.51	-70
					-70.195	-563.299	-70
					-70.26	-562.997	-70
					-70.512	-562.644	-70
					-70.788	-562.306	-70
					-70.936	-562.007	-70
					-70.917	-561.702	-70
					-70.805	-561.299	-70
					-70.725	-560.709	-70
					-70.767	-559.887	-70
					-70.935	-558.861	-70
					-71.135	-557.77	-70
					-71.24	-556.852	-70
					-71.169	-556.367	-70
					-70.939	-556.446	-70
					-70.629	-556.998	-70
					-70.318	-557.768	-70
					-70.059	-558.489	-70
					-69.886	-559.021	-70
					-69.82	-559.37	-70
					-69.852	-559.629	-70
					-69.946	-559.886	-70
					-70.061	-560.175	-70
					-70.19	-560.476	-70
					-70.345	-560.718	-70
					-70.522	-560.802	-70
					-70.667	-560.631	-70
					-70.716	-560.177	-70
					-70.666	-559.517	-70
					-70.588	-558.815	-70
					-70.559	-558.233	-70
					-70.589	-557.843	-70
					-70.62	-557.619	-70
					-70.596	-557.473	-70
					-70.52	-557.298	-70
					-70.437	-557.007	-70
					-70.386	-556.567	-70
					-70.369	-556.018	-70
					-70.351	-555.456	-70
					-70.3	-554.99	-70
					-70.227	-554.687	-70
					-70.2	-554.537	-70
					-70.296	-554.472	-70
					-70.518	-554.441	-70
					-70.777	-554.485	-70
					-70.949	-554.703	-70
					-70.983	-555.129	-70
					-70.931	-555.65	-70
					-70.873	-556.06	-70
					-70.832	-556.203	-70
					-70.76	-556.057	-70
					-70.614	-555.705	-70
					-70.415	-555.252	-70
					-70.237	-554.781	-70
					-70.15	-554.37	-70
					-70.173	-554.103	-70
					-70.281	-554.054	-70
					-70.416	-554.237	-70
					-70.504	-554.583	-70
					-70.471	-554.952	-70
					-70.292	-555.21	-70
					-70.018	-555.303	-70
					-69.749	-555.269	-70
					-69.576	-555.154	-70
					-69.537	-554.927	-70
					-69.633	-554.493	-70
					-69.847	-553.799	-70
					-70.142	-552.914	-70
					-70.456	-552.009	-70
					-70.707	-551.255	-70
					-70.839	-550.742	-70
					-70.843	-550.464	-70
					-70.758	-550.382	-70
					-70.636	-550.473	-70
					-70.519	-550.739	-70
					-70.423	-551.149	-70
					-70.334	-551.607	-70
					-70.227	-551.986	-70
					-70.08	-552.197	-70
					-69.875	-552.222	-70
					-69.621	-552.093	-70
					-69.37	-551.858	-70
					-69.193	-551.55	-70
					-69.143	-551.205	-70
					-69.215	-550.867	-70
					-69.358	-550.575	-70
					-69.525	-550.346	-70
					-69.703	-550.153	-70
					-69.91	-549.945	-70
					-70.158	-549.677	-70
					-70.411	-549.335	-70
					-70.593	-548.943	-70
					-70.632	-548.566	-70
					-70.523	-548.288	-70
					-70.333	-548.158	-70
					-70.146	-548.139	-70
					-70.008	-548.118	-70
					-69.922	-547.981	-70
					-69.861	-547.689	-70
					-69.794	-547.281	-70
					-69.702	-546.832	-70
					-69.583	-546.403	-70
					-69.447	-546.008	-70
					-69.311	-545.62	-70
					-69.202	-545.195	-70
					-69.158	-544.704	-70
					-69.218	-544.159	-70
					-69.395	-543.622	-70
					-69.658	-543.176	-70
					-69.936	-542.892	-70
					-70.154	-542.807	-70
					-70.266	-542.929	-70
					-70.271	-543.237	-70
					-70.21	-543.669	-70
					-70.152	-544.116	-70
					-70.165	-544.468	-70
					-70.276	-544.662	-70
					-70.434	-544.703	-70
					-70.53	-544.637	-70
					-70.451	-544.51	-70
					-70.156	-544.347	-70
					-69.71	-544.146	-70
					-69.26	-543.875	-70
					-68.94	-543.485	-70
					-68.808	-542.954	-70
					-68.829	-542.34	-70
					-68.934	-541.797	-70
					-69.088	-541.535	-70
					-69.309	-541.71	-70
					-69.624	-542.336	-70
					-70	-543.243	-70
					-70.333	-544.135	-70
					-70.512	-544.727	-70
					-70.493	-544.894	-70
					-70.302	-544.718	-70
					-69.999	-544.386	-70
					-69.65	-544.026	-70
					-69.33	-543.651	-70
					-69.102	-543.238	-70
					-68.981	-542.81	-70
					-68.92	-542.42	-70
					-68.841	-542.063	-70
					-68.708	-541.678	-70
					-68.581	-541.213	-70
					-68.573	-540.687	-70
					-68.759	-540.179	-70
					-69.098	-539.778	-70
					-69.453	-539.55	-70
					-69.668	-539.515	-70
					-69.656	-539.644	-70
					-69.451	-539.87	-70
					-69.178	-540.111	-70
					-68.979	-540.296	-70
					-68.946	-540.374	-70
					-69.093	-540.34	-70
					-69.374	-540.236	-70
					-69.701	-540.127	-70
					-69.973	-540.039	-70
					-70.093	-539.942	-70
					-70	-539.804	-70
					-69.71	-539.667	-70
					-69.318	-539.627	-70
					-68.954	-539.713	-70
					-68.716	-539.815	-70
					-68.634	-539.749	-70
					-68.674	-539.419	-70
					-68.759	-538.881	-70
					-68.805	-538.283	-70
					-68.763	-537.761	-70
					-68.645	-537.385	-70
					-68.523	-537.173	-70
					-68.493	-537.108	-70
					-68.621	-537.136	-70
					-68.916	-537.173	-70
					-69.327	-537.143	-70
					-69.756	-537.033	-70
					-70.095	-536.908	-70
					-70.268	-536.849	-70
					-70.267	-536.865	-70
					-70.154	-536.864	-70
					-70.016	-536.734	-70
					-69.923	-536.463	-70
					-69.904	-536.15	-70
					-69.939	-535.921	-70
					-69.981	-535.83	-70
					-69.987	-535.834	-70
					-69.954	-535.82	-70
					-69.925	-535.655	-70
					-69.959	-535.251	-70
					-70.071	-534.604	-70
					-70.206	-533.782	-70
					-70.262	-532.869	-70
					-70.159	-531.944	-70
					-69.899	-531.104	-70
					-69.556	-530.479	-70
					-69.227	-530.159	-70
					-68.982	-530.124	-70
					-68.846	-530.238	-70
					-68.819	-530.35	-70
					-68.891	-530.375	-70
					-69.039	-530.292	-70
					-69.227	-530.089	-70
					-69.411	-529.752	-70
					-69.555	-529.306	-70
					-69.631	-528.854	-70
					-69.622	-528.538	-70
					-69.532	-528.46	-70
					-69.391	-528.626	-70
					-69.234	-528.962	-70
					-69.075	-529.362	-70
					-68.92	-529.723	-70
					-68.798	-529.93	-70
					-68.765	-529.877	-70
					-68.859	-529.531	-70
					-69.06	-528.976	-70
					-69.306	-528.375	-70
					-69.543	-527.879	-70
					-69.744	-527.56	-70
					-69.897	-527.404	-70
					-70.003	-527.362	-70
					-70.095	-527.395	-70
					-70.23	-527.483	-70
					-70.441	-527.608	-70
					-70.709	-527.735	-70
					-70.972	-527.809	-70
					-71.178	-527.756	-70
					-71.298	-527.516	-70
					-71.321	-527.098	-70
					-71.255	-526.615	-70
					-71.151	-526.262	-70
					-71.109	-526.218	-70
					-71.216	-526.538	-70
					-71.464	-527.123	-70
					-71.751	-527.794	-70
					-71.952	-528.402	-70
					-71.997	-528.886	-70

## Sheet: Figure 2c
interpoint interval = 60 µs
trace number < 145 = step to -35, else step to -30 mV
cb2 Fail:cone Fail (paired traces)																	Success:Fail																					Success:Success
cb2_124	cone_125	cb2_128	cone_129	cb2_132	cone_133	cb2_134	cone_135	cb2_140	cone_141	cb2_232	cone_233	cb2_248	cone_249	cb2_258	cone_259	mV	cb2_110	cone_111	cb2_112	cone_113	cb2_120	cone_121	cb2_142	cone_143	cb2_204	cone_205	cb2_250	cone_251	cb2_260	cone_261	cb2_272	cone_273	cb2_286	cone_287	cb2_292	cone_293	mV	cb2_114	cone_115	cb2_118	cone_119	cb2_122	cone_123	cb2_126	cone_127	cb2_130	cone_131	cb2_138	cone_139
-0.124	-1.146	-0.992	0.173	0.304	-0.369	-0.13	0.125	-0.848	1.022	0.477	0.03	-0.413	-0.484	0.303	-0.187	-70	-0.524	-0.472	-0.381	0.371	-0.2	0.544	-0.057	0.441	1.144	-0.085	-0.84	0.579	0.321	0.324	0.508	0.925	0.599	0.095	-0.699	0.079	-70	-0.271	-0.56	0.069	-0.338	-0.927	0.828	-0.589	0.415	0.377	-1.177	-0.668	1.227
-0.292	-1.453	-1.035	0.267	0.411	-0.602	0.019	0.128	-0.863	1.314	0.459	0.113	-0.593	-0.577	0.124	-0.199	-70	-0.579	-0.506	-0.438	0.541	-0.33	0.383	-0.143	0.583	1.091	-0.121	-0.879	0.586	0.494	0.465	0.58	1.266	0.258	0.073	-0.726	0.082	-70	-0.192	-0.897	0.223	-0.352	-1.009	0.988	-0.473	0.605	0.363	-1.439	-0.591	1.389
-0.364	-1.718	-0.905	0.376	0.658	-0.881	0.25	0.1	-0.724	1.544	0.336	0.203	-0.722	-0.585	-0.102	-0.222	-70	-0.52	-0.536	-0.568	0.698	-0.454	0.109	-0.249	0.706	0.857	-0.171	-0.696	0.504	0.726	0.597	0.543	1.595	-0.26	0.003	-0.522	0.071	-70	0.091	-1.311	0.385	-0.298	-0.903	1.092	-0.303	0.876	0.317	-1.67	-0.351	1.462
-0.271	-1.907	-0.671	0.481	1.067	-1.172	0.507	0.043	-0.461	1.66	0.165	0.286	-0.811	-0.491	-0.266	-0.288	-70	-0.397	-0.59	-0.821	0.792	-0.482	-0.218	-0.365	0.779	0.552	-0.228	-0.321	0.333	1.002	0.687	0.41	1.855	-0.691	-0.113	-0.111	0.052	-70	0.445	-1.75	0.541	-0.177	-0.644	1.138	-0.208	1.218	0.262	-1.84	-0.05	1.431
-0.041	-1.995	-0.443	0.56	1.51	-1.432	0.753	-0.027	-0.106	1.635	0.002	0.351	-0.9	-0.32	-0.314	-0.418	-70	-0.302	-0.682	-1.148	0.772	-0.35	-0.521	-0.499	0.778	0.273	-0.273	0.143	0.093	1.261	0.702	0.238	1.998	-0.793	-0.246	0.368	0.028	-70	0.602	-2.146	0.689	-0.018	-0.321	1.145	-0.256	1.59	0.189	-1.916	0.188	1.297
0.22	-1.969	-0.311	0.592	1.75	-1.629	0.989	-0.098	0.308	1.468	-0.153	0.395	-0.984	-0.126	-0.292	-0.61	-70	-0.312	-0.81	-1.421	0.609	-0.098	-0.734	-0.659	0.705	0.056	-0.285	0.58	-0.182	1.408	0.633	0.089	1.995	-0.499	-0.347	0.75	-0.003	-70	0.388	-2.437	0.78	0.137	-0.004	1.139	-0.408	1.935	0.048	-1.868	0.322	1.075
0.406	-1.825	-0.325	0.568	1.604	-1.75	1.204	-0.167	0.693	1.183	-0.345	0.417	-0.992	0.031	-0.286	-0.827	-70	-0.466	-0.942	-1.523	0.313	0.156	-0.828	-0.818	0.587	-0.097	-0.255	0.885	-0.458	1.379	0.497	-0.008	1.851	0.075	-0.366	0.947	-0.061	-70	-0.109	-2.59	0.708	0.244	0.282	1.141	-0.582	2.199	-0.211	-1.682	0.405	0.795
0.466	-1.57	-0.477	0.49	1.099	-1.811	1.329	-0.251	0.919	0.818	-0.585	0.408	-0.861	0.113	-0.319	-1.013	-70	-0.778	-1.038	-1.433	-0.057	0.321	-0.814	-0.918	0.471	-0.183	-0.196	0.978	-0.706	1.23	0.333	-0.061	1.606	0.732	-0.274	0.973	-0.175	-70	-0.619	-2.608	0.41	0.277	0.51	1.166	-0.754	2.36	-0.596	-1.37	0.507	0.492
0.425	-1.224	-0.675	0.379	0.478	-1.842	1.289	-0.367	0.893	0.417	-0.802	0.348	-0.617	0.115	-0.317	-1.118	-70	-1.249	-1.053	-1.215	-0.416	0.393	-0.723	-0.911	0.402	-0.188	-0.141	0.836	-0.918	1.123	0.18	-0.074	1.32	1.276	-0.087	0.893	-0.373	-70	-0.912	-2.522	-0.064	0.233	0.61	1.226	-0.978	2.435	-1.04	-0.972	0.614	0.195
0.355	-0.814	-0.762	0.267	0.023	-1.868	1.067	-0.514	0.646	0.026	-0.889	0.216	-0.329	0.062	-0.2	-1.125	-70	-1.822	-0.966	-0.934	-0.678	0.429	-0.588	-0.813	0.399	-0.121	-0.136	0.514	-1.092	1.179	0.059	-0.028	1.058	1.565	0.14	0.776	-0.659	-70	-0.927	-2.373	-0.56	0.121	0.507	1.325	-1.31	2.463	-1.409	-0.54	0.64	-0.072
0.31	-0.38	-0.626	0.188	-0.141	-1.895	0.718	-0.666	0.312	-0.311	-0.786	0.005	-0.029	-0.009	0.018	-1.046	-70	-2.378	-0.79	-0.626	-0.791	0.492	-0.435	-0.684	0.456	-0.024	-0.217	0.13	-1.23	1.324	-0.03	0.108	0.854	1.549	0.332	0.685	-1	-70	-0.725	-2.196	-0.909	-0.048	0.208	1.456	-1.706	2.475	-1.567	-0.115	0.509	-0.296
0.286	0.031	-0.322	0.16	-0.099	-1.902	0.299	-0.776	0.018	-0.557	-0.532	-0.263	0.306	-0.068	0.217	-0.917	-70	-2.774	-0.571	-0.322	-0.745	0.605	-0.278	-0.556	0.549	0.062	-0.396	-0.185	-1.328	1.355	-0.102	0.346	0.705	1.299	0.427	0.651	-1.336	-70	-0.408	-2.012	-1.004	-0.269	-0.191	1.592	-2.03	2.476	-1.438	0.283	0.215	-0.461
0.242	0.367	-0.042	0.17	-0.027	-1.855	-0.166	-0.81	-0.198	-0.686	-0.235	-0.547	0.677	-0.105	0.276	-0.766	-70	-2.918	-0.371	-0.087	-0.567	0.733	-0.125	-0.393	0.652	0.138	-0.657	-0.351	-1.374	1.172	-0.177	0.663	0.575	0.964	0.403	0.645	-1.593	-70	-0.096	-1.821	-0.839	-0.538	-0.58	1.691	-2.124	2.444	-1.04	0.65	-0.207	-0.553
0.159	0.582	0.054	0.187	-0.043	-1.722	-0.615	-0.762	-0.37	-0.69	-0.007	-0.798	1.016	-0.132	0.175	-0.605	-70	-2.783	-0.237	0.008	-0.302	0.804	0.023	-0.117	0.74	0.249	-0.959	-0.36	-1.362	0.873	-0.267	1.008	0.427	0.689	0.287	0.591	-1.71	-70	0.093	-1.614	-0.491	-0.843	-0.91	1.712	-1.9	2.35	-0.495	0.986	-0.706	-0.566
0.043	0.652	-0.027	0.17	-0.175	-1.489	-0.903	-0.66	-0.515	-0.577	0.082	-0.985	1.218	-0.175	-0.01	-0.43	-70	-2.398	-0.18	-0.071	0.014	0.768	0.163	0.305	0.783	0.42	-1.256	-0.26	-1.304	0.609	-0.378	1.325	0.243	0.564	0.135	0.422	-1.659	-70	0.077	-1.381	-0.06	-1.158	-1.163	1.639	-1.379	2.183	0.014	1.274	-1.194	-0.514
-0.101	0.581	-0.158	0.092	-0.373	-1.166	-0.885	-0.552	-0.597	-0.375	0.01	-1.106	1.213	-0.259	-0.19	-0.239	-70	-1.843	-0.174	-0.268	0.348	0.627	0.289	0.806	0.741	0.591	-1.51	-0.114	-1.227	0.4	-0.509	1.588	0.042	0.606	0.014	0.136	-1.447	-70	-0.145	-1.123	0.37	-1.436	-1.294	1.484	-0.701	1.957	0.332	1.488	-1.52	-0.436
-0.264	0.407	-0.23	-0.058	-0.552	-0.791	-0.586	-0.482	-0.568	-0.129	-0.198	-1.183	1.012	-0.39	-0.339	-0.044	-70	-1.249	-0.179	-0.437	0.678	0.429	0.387	1.252	0.573	0.637	-1.703	0.017	-1.158	0.182	-0.652	1.805	-0.133	0.757	-0.022	-0.207	-1.11	-70	-0.505	-0.855	0.736	-1.633	-1.24	1.287	-0.071	1.706	0.421	1.605	-1.534	-0.381
-0.417	0.186	-0.222	-0.285	-0.629	-0.419	-0.224	-0.475	-0.437	0.101	-0.454	-1.245	0.708	-0.548	-0.471	0.128	-70	-0.762	-0.162	-0.408	0.977	0.225	0.437	1.524	0.264	0.478	-1.835	0.093	-1.11	-0.053	-0.785	1.964	-0.238	0.903	0.048	-0.532	-0.703	-70	-0.903	-0.599	0.997	-1.721	-0.989	1.095	0.346	1.463	0.354	1.629	-1.194	-0.389
-0.501	-0.022	-0.172	-0.586	-0.57	-0.112	-0.029	-0.534	-0.279	0.259	-0.616	-1.305	0.406	-0.69	-0.596	0.247	-70	-0.471	-0.115	-0.118	1.219	0.042	0.428	1.566	-0.16	0.177	-1.916	0.125	-1.082	-0.223	-0.875	2.015	-0.244	0.943	0.213	-0.782	-0.284	-70	-1.252	-0.37	1.161	-1.705	-0.616	0.951	0.514	1.247	0.227	1.587	-0.601	-0.47
-0.463	-0.171	-0.126	-0.95	-0.398	0.078	-0.039	-0.652	-0.162	0.308	-0.576	-1.355	0.159	-0.771	-0.686	0.299	-70	-0.37	-0.048	0.285	1.376	-0.118	0.364	1.392	-0.625	-0.073	-1.959	0.184	-1.068	-0.255	-0.883	1.895	-0.145	0.866	0.434	-0.939	0.084	-70	-1.494	-0.169	1.297	-1.626	-0.245	0.884	0.517	1.061	0.092	1.52	0.05	-0.609
-0.307	-0.243	-0.123	-1.348	-0.169	0.125	-0.091	-0.814	-0.073	0.247	-0.379	-1.365	-0.047	-0.763	-0.697	0.298	-70	-0.377	0.023	0.499	1.431	-0.247	0.268	1.078	-1.044	-0.088	-1.981	0.333	-1.071	-0.162	-0.779	1.608	0.043	0.747	0.662	-1.016	0.354	-70	-1.593	0.011	1.472	-1.536	0.009	0.899	0.49	0.907	-0.042	1.454	0.544	-0.771
-0.101	-0.237	-0.197	-1.73	0.04	0.047	-0.003	-1.001	0.052	0.112	-0.212	-1.309	-0.242	-0.668	-0.602	0.287	-70	-0.398	0.083	0.295	1.385	-0.299	0.171	0.767	-1.342	0.15	-2.001	0.562	-1.105	-0.025	-0.564	1.243	0.288	0.66	0.856	-1.033	0.496	-70	-1.526	0.178	1.683	-1.471	0.074	0.989	0.534	0.791	-0.171	1.381	0.702	-0.922
0.076	-0.171	-0.328	-2.038	0.144	-0.099	0.248	-1.188	0.23	-0.04	-0.25	-1.177	-0.406	-0.511	-0.41	0.319	-70	-0.383	0.126	-0.279	1.256	-0.224	0.101	0.614	-1.489	0.496	-2.029	0.78	-1.178	0.071	-0.272	0.91	0.553	0.605	0.993	-0.988	0.51	-70	-1.289	0.328	1.835	-1.431	-0.036	1.128	0.659	0.726	-0.289	1.267	0.453	-1.036
0.23	-0.068	-0.405	-2.225	0.079	-0.234	0.562	-1.341	0.395	-0.148	-0.514	-0.993	-0.481	-0.325	-0.178	0.429	-70	-0.351	0.152	-0.908	1.075	-0.048	0.069	0.688	-1.498	0.795	-2.066	0.896	-1.275	0.103	0.044	0.655	0.802	0.533	1.072	-0.868	0.421	-70	-0.904	0.439	1.815	-1.385	-0.192	1.284	0.772	0.733	-0.406	1.07	-0.103	-1.105
0.462	0.05	-0.31	-2.267	-0.163	-0.285	0.856	-1.43	0.472	-0.17	-0.864	-0.809	-0.425	-0.129	0.01	0.617	-70	-0.367	0.17	-1.25	0.864	0.099	0.073	0.915	-1.406	0.991	-2.095	0.891	-1.356	0.131	0.331	0.437	1.007	0.426	1.102	-0.678	0.269	-70	-0.418	0.481	1.565	-1.293	-0.21	1.423	0.741	0.83	-0.558	0.774	-0.717	-1.13
0.851	0.163	-0.076	-2.176	-0.526	-0.206	1.144	-1.435	0.443	-0.09	-1.1	-0.678	-0.276	0.067	0.099	0.857	-70	-0.483	0.186	-1.156	0.638	0.094	0.102	1.13	-1.252	1.092	-2.098	0.83	-1.371	0.237	0.558	0.213	1.147	0.32	1.099	-0.464	0.095	-70	0.11	0.425	1.117	-1.133	-0.008	1.515	0.505	1.02	-0.772	0.399	-1.135	-1.118
1.326	0.254	0.098	-1.989	-0.913	0.008	1.442	-1.356	0.33	0.082	-1.096	-0.637	-0.149	0.261	0.112	1.11	-70	-0.674	0.204	-0.748	0.394	-0.063	0.149	1.195	-1.068	1.096	-2.068	0.775	-1.289	0.422	0.727	-0.005	1.209	0.24	1.083	-0.287	-0.065	-70	0.621	0.267	0.57	-0.909	0.309	1.544	0.109	1.283	-0.996	-0.006	-1.238	-1.079
1.691	0.312	0.014	-1.755	-1.202	0.324	1.65	-1.213	0.165	0.312	-0.876	-0.687	-0.172	0.449	0.168	1.337	-70	-0.828	0.213	-0.306	0.13	-0.251	0.209	1.07	-0.872	0.972	-2.024	0.713	-1.115	0.596	0.851	-0.163	1.187	0.149	1.073	-0.177	-0.184	-70	1.057	0.032	0.066	-0.643	0.544	1.511	-0.322	1.569	-1.102	-0.395	-1.06	-1.026
1.785	0.338	-0.328	-1.523	-1.281	0.683	1.592	-1.039	-0.013	0.55	-0.569	-0.793	-0.405	0.62	0.39	1.51	-70	-0.815	0.203	-0.094	-0.145	-0.364	0.28	0.796	-0.683	0.712	-2.005	0.571	-0.883	0.651	0.942	-0.212	1.088	-0.01	1.085	-0.121	-0.244	-70	1.344	-0.231	-0.255	-0.366	0.577	1.428	-0.662	1.808	-0.956	-0.749	-0.709	-0.968
1.61	0.346	-0.744	-1.317	-1.123	1.019	1.184	-0.87	-0.149	0.745	-0.3	-0.904	-0.774	0.764	0.778	1.601	-70	-0.591	0.169	-0.192	-0.41	-0.4	0.362	0.443	-0.522	0.385	-2.042	0.324	-0.639	0.522	0.988	-0.143	0.934	-0.226	1.127	-0.092	-0.242	-70	1.41	-0.469	-0.327	-0.102	0.433	1.315	-0.823	1.928	-0.526	-1.073	-0.293	-0.915
1.295	0.368	-1.049	-1.142	-0.815	1.279	0.57	-0.732	-0.206	0.862	-0.132	-0.969	-1.084	0.872	1.157	1.589	-70	-0.24	0.127	-0.483	-0.628	-0.426	0.452	0.077	-0.411	0.12	-2.137	0.063	-0.41	0.211	0.961	0.01	0.766	-0.403	1.199	-0.068	-0.186	-70	1.238	-0.643	-0.207	0.131	0.204	1.19	-0.775	1.881	0.081	-1.389	0.099	-0.875
0.972	0.438	-1.192	-0.987	-0.523	1.436	0.062	-0.64	-0.226	0.891	-0.09	-0.958	-1.13	0.949	1.298	1.469	-70	0.088	0.101	-0.775	-0.76	-0.477	0.544	-0.239	-0.37	0.024	-2.249	-0.058	-0.202	-0.205	0.836	0.166	0.624	-0.442	1.295	-0.029	-0.092	-70	0.927	-0.746	-0.042	0.327	-0.019	1.059	-0.555	1.662	0.66	-1.707	0.409	-0.855
0.67	0.584	-1.222	-0.847	-0.378	1.492	-0.074	-0.602	-0.302	0.846	-0.201	-0.869	-0.835	1.002	1.123	1.261	-70	0.29	0.111	-0.951	-0.786	-0.5	0.628	-0.431	-0.402	0.096	-2.311	0.042	-0.011	-0.586	0.614	0.23	0.534	-0.31	1.399	0.053	0.018	-70	0.638	-0.796	0.036	0.488	-0.162	0.922	-0.243	1.319	1.015	-2.026	0.625	-0.863
0.334	0.8	-1.175	-0.737	-0.405	1.471	0.189	-0.621	-0.479	0.753	-0.466	-0.723	-0.312	1.033	0.771	1.012	-70	0.387	0.154	-0.994	-0.716	-0.418	0.686	-0.429	-0.489	0.216	-2.262	0.292	0.16	-0.812	0.328	0.148	0.502	-0.036	1.484	0.173	0.121	-70	0.469	-0.823	-0.017	0.62	-0.16	0.775	0.068	0.938	1.045	-2.331	0.793	-0.91
-0.06	1.048	-1.034	-0.68	-0.516	1.407	0.652	-0.693	-0.692	0.641	-0.8	-0.553	0.201	1.037	0.462	0.773	-70	0.499	0.209	-0.94	-0.587	-0.238	0.707	-0.2	-0.604	0.236	-2.074	0.517	0.293	-0.874	0.033	-0.047	0.514	0.33	1.515	0.268	0.196	-70	0.376	-0.845	-0.186	0.73	-0.009	0.614	0.313	0.612	0.768	-2.605	0.964	-1.005
-0.413	1.262	-0.797	-0.691	-0.594	1.331	1.038	-0.812	-0.83	0.541	-1.051	-0.383	0.495	0.995	0.337	0.58	-70	0.737	0.246	-0.826	-0.457	-0.081	0.694	0.209	-0.714	0.091	-1.766	0.577	0.368	-0.878	-0.224	-0.247	0.553	0.712	1.455	0.245	0.227	-70	0.229	-0.865	-0.434	0.816	0.215	0.438	0.463	0.411	0.297	-2.834	1.119	-1.155
-0.555	1.369	-0.541	-0.762	-0.561	1.264	1.156	-0.962	-0.84	0.475	-1.086	-0.228	0.521	0.889	0.398	0.438	-70	1.116	0.25	-0.688	-0.378	-0.083	0.671	0.674	-0.798	-0.158	-1.397	0.455	0.375	-0.93	-0.418	-0.323	0.607	1.002	1.284	0.081	0.212	-70	-0.043	-0.866	-0.683	0.865	0.394	0.252	0.509	0.366	-0.203	-3.003	1.155	-1.358
-0.42	1.321	-0.39	-0.864	-0.401	1.219	0.969	-1.118	-0.749	0.449	-0.87	-0.092	0.389	0.716	0.551	0.328	-70	1.551	0.24	-0.554	-0.383	-0.257	0.67	1.028	-0.855	-0.386	-1.037	0.251	0.327	-1.02	-0.555	-0.205	0.672	1.101	1.009	-0.139	0.16	-70	-0.376	-0.828	-0.799	0.86	0.435	0.063	0.454	0.467	-0.567	-3.097	0.983	-1.597
-0.122	1.113	-0.421	-0.958	-0.149	1.201	0.587	-1.251	-0.604	0.444	-0.49	0.017	0.232	0.498	0.696	0.228	-70	1.926	0.255	-0.446	-0.475	-0.472	0.707	1.15	-0.899	-0.503	-0.748	0.089	0.255	-1.04	-0.657	0.063	0.745	1.002	0.671	-0.283	0.095	-70	-0.613	-0.744	-0.664	0.793	0.304	-0.115	0.323	0.681	-0.691	-3.106	0.637	-1.837
0.139	0.784	-0.578	-1.009	0.131	1.212	0.192	-1.336	-0.436	0.428	-0.102	0.088	0.083	0.284	0.778	0.133	-70	2.16	0.345	-0.369	-0.641	-0.584	0.778	1.022	-0.945	-0.487	-0.559	0.019	0.19	-0.909	-0.75	0.354	0.82	0.808	0.33	-0.288	0.043	-70	-0.624	-0.621	-0.291	0.672	0.022	-0.264	0.179	0.968	-0.562	-3.029	0.257	-2.022
0.245	0.411	-0.696	-0.999	0.375	1.247	-0.049	-1.362	-0.269	0.377	0.161	0.102	-0.124	0.129	0.796	0.056	-70	2.233	0.538	-0.311	-0.854	-0.561	0.854	0.702	-0.993	-0.342	-0.463	0	0.155	-0.652	-0.847	0.524	0.882	0.647	0.046	-0.19	0.024	-70	-0.402	-0.486	0.159	0.528	-0.343	-0.359	0.089	1.286	-0.252	-2.877	-0.015	-2.087
0.213	0.077	-0.582	-0.923	0.555	1.287	-0.054	-1.337	-0.138	0.292	0.269	0.047	-0.434	0.083	0.756	0.013	-70	2.172	0.818	-0.252	-1.09	-0.466	0.903	0.255	-1.025	-0.092	-0.416	-0.029	0.155	-0.352	-0.954	0.499	0.919	0.574	-0.143	-0.059	0.044	-70	-0.062	-0.371	0.492	0.408	-0.671	-0.371	0.083	1.601	0.131	-2.67	-0.116	-1.983
0.13	-0.151	-0.139	-0.787	0.689	1.303	0.157	-1.279	-0.097	0.192	0.284	-0.077	-0.779	0.161	0.645	0.011	-70	2.014	1.131	-0.186	-1.325	-0.334	0.905	-0.279	-1.013	0.187	-0.357	-0.07	0.183	-0.064	-1.071	0.308	0.922	0.558	-0.234	0.076	0.098	-70	0.239	-0.301	0.616	0.35	-0.811	-0.279	0.135	1.874	0.478	-2.435	-0.077	-1.698
0.047	-0.245	0.568	-0.6	0.808	1.263	0.481	-1.204	-0.185	0.103	0.271	-0.248	-1.004	0.337	0.446	0.032	-70	1.798	1.406	-0.146	-1.535	-0.13	0.855	-0.852	-0.941	0.369	-0.236	-0.068	0.229	0.207	-1.192	0.068	0.885	0.576	-0.258	0.218	0.174	-70	0.4	-0.289	0.561	0.371	-0.668	-0.077	0.2	2.068	0.698	-2.203	0.01	-1.272
-0.073	-0.225	1.329	-0.372	0.908	1.151	0.779	-1.111	-0.387	0.039	0.23	-0.433	-0.979	0.551	0.182	0.048	-70	1.576	1.59	-0.162	-1.696	0.17	0.761	-1.374	-0.819	0.368	-0.042	0.012	0.287	0.444	-1.312	-0.091	0.806	0.661	-0.261	0.359	0.26	-70	0.403	-0.334	0.422	0.444	-0.3	0.215	0.263	2.148	0.73	-2.008	0.051	-0.787
-0.326	-0.138	1.901	-0.108	0.936	0.97	0.942	-0.985	-0.623	0	0.117	-0.601	-0.676	0.737	-0.068	0.035	-70	1.4	1.674	-0.199	-1.784	0.481	0.645	-1.747	-0.682	0.225	0.188	0.141	0.345	0.591	-1.427	-0.106	0.677	0.833	-0.284	0.448	0.348	-70	0.295	-0.425	0.292	0.51	0.103	0.553	0.356	2.101	0.573	-1.875	0.022	-0.335
-0.751	-0.036	2.136	0.179	0.846	0.747	0.946	-0.812	-0.791	-0.009	-0.082	-0.735	-0.19	0.855	-0.197	-0.01	-70	1.295	1.693	-0.156	-1.778	0.634	0.533	-1.914	-0.574	0.101	0.385	0.243	0.386	0.579	-1.535	-0.02	0.495	1.011	-0.346	0.413	0.43	-70	0.154	-0.543	0.229	0.504	0.347	0.877	0.513	1.943	0.309	-1.812	-0.021	0.017
-1.244	0.051	2.035	0.47	0.66	0.518	0.848	-0.593	-0.815	0.024	-0.324	-0.839	0.322	0.905	-0.133	-0.066	-70	1.248	1.7	0.051	-1.667	0.509	0.454	-1.863	-0.53	0.176	0.483	0.252	0.384	0.395	-1.635	0.054	0.269	1.054	-0.431	0.226	0.502	-70	0.068	-0.657	0.243	0.392	0.372	1.129	0.724	1.712	0.069	-1.804	0.005	0.249
-1.604	0.123	1.7	0.73	0.462	0.315	0.722	-0.357	-0.688	0.115	-0.542	-0.92	0.711	0.92	0.129	-0.103	-70	1.235	1.735	0.398	-1.448	0.146	0.435	-1.611	-0.564	0.519	0.449	0.142	0.32	0.115	-1.728	-0.001	0.035	0.897	-0.506	-0.039	0.562	-70	0.102	-0.725	0.297	0.196	0.269	1.272	0.925	1.454	-0.045	-1.82	0.127	0.385
-1.681	0.191	1.265	0.921	0.321	0.152	0.614	-0.151	-0.465	0.264	-0.685	-0.987	0.911	0.937	0.52	-0.102	-70	1.232	1.804	0.768	-1.132	-0.276	0.486	-1.199	-0.673	1.025	0.292	-0.072	0.194	-0.125	-1.808	-0.207	-0.148	0.591	-0.538	-0.242	0.613	-70	0.255	-0.705	0.354	-0.021	0.18	1.308	1.035	1.199	-0.032	-1.826	0.292	0.473
-1.466	0.259	0.867	1.017	0.201	0.032	0.527	-0.024	-0.231	0.446	-0.742	-1.039	0.969	0.978	0.937	-0.057	-70	1.182	1.888	1.043	-0.744	-0.559	0.598	-0.725	-0.844	1.467	0.054	-0.336	0.029	-0.207	-1.854	-0.451	-0.221	0.221	-0.514	-0.29	0.663	-70	0.434	-0.564	0.409	-0.184	0.196	1.271	0.999	0.951	0.02	-1.805	0.397	0.557
-1.05	0.313	0.614	1.016	-0.028	-0.054	0.442	0.002	-0.035	0.616	-0.75	-1.063	1.007	1.031	1.285	0.023	-70	0.996	1.949	1.155	-0.32	-0.595	0.746	-0.339	-1.064	1.65	-0.209	-0.569	-0.133	-0.102	-1.83	-0.567	-0.155	-0.169	-0.445	-0.202	0.717	-70	0.517	-0.301	0.473	-0.249	0.323	1.212	0.823	0.7	0.025	-1.761	0.371	0.649
-0.526	0.323	0.538	0.942	-0.482	-0.118	0.349	-0.051	0.141	0.726	-0.753	-1.039	1.095	1.058	1.508	0.122	-70	0.623	1.954	1.093	0.094	-0.411	0.894	-0.171	-1.317	1.544	-0.44	-0.69	-0.25	0.108	-1.696	-0.493	0.027	-0.557	-0.354	-0.075	0.775	-70	0.455	0.042	0.534	-0.224	0.518	1.165	0.569	0.44	-0.034	-1.716	0.236	0.73
0.017	0.264	0.571	0.842	-1.136	-0.162	0.264	-0.13	0.35	0.75	-0.749	-0.954	1.167	1.016	1.577	0.232	-70	0.141	1.883	0.879	0.447	-0.145	1.01	-0.229	-1.579	1.296	-0.6	-0.65	-0.295	0.284	-1.427	-0.357	0.252	-0.871	-0.262	0.004	0.825	-70	0.312	0.389	0.55	-0.155	0.707	1.128	0.325	0.184	-0.136	-1.699	0.1	0.758
0.456	0.132	0.593	0.769	-1.804	-0.18	0.225	-0.169	0.593	0.683	-0.669	-0.81	1.058	0.874	1.466	0.342	-70	-0.264	1.734	0.572	0.694	0.039	1.062	-0.381	-1.814	1.089	-0.668	-0.446	-0.267	0.33	-1.03	-0.342	0.426	-0.99	-0.174	0.015	0.856	-70	0.204	0.649	0.478	-0.101	0.801	1.066	0.141	-0.042	-0.285	-1.732	0.073	0.699
0.665	-0.044	0.526	0.766	-2.264	-0.162	0.257	-0.128	0.779	0.533	-0.472	-0.636	0.672	0.639	1.169	0.442	-70	-0.44	1.525	0.263	0.804	0.061	1.026	-0.456	-1.976	1	-0.642	-0.12	-0.184	0.239	-0.548	-0.492	0.471	-0.828	-0.09	-0.003	0.86	-70	0.208	0.763	0.308	-0.095	0.707	0.938	-0.003	-0.199	-0.523	-1.827	0.194	0.548
0.612	-0.214	0.392	0.859	-2.393	-0.099	0.369	-0.011	0.785	0.313	-0.228	-0.474	0.111	0.353	0.731	0.518	-70	-0.399	1.284	0.051	0.764	-0.036	0.882	-0.371	-2.025	0.967	-0.537	0.246	-0.08	0.065	-0.037	-0.658	0.363	-0.416	-0.009	0.001	0.839	-70	0.316	0.728	0.071	-0.134	0.395	0.729	-0.161	-0.259	-0.867	-1.972	0.4	0.331
0.387	-0.318	0.27	1.048	-2.2	0.012	0.552	0.146	0.575	0.045	-0.104	-0.361	-0.379	0.079	0.238	0.552	-70	-0.296	1.042	-0.013	0.58	-0.17	0.628	-0.181	-1.94	0.875	-0.376	0.543	0.017	-0.144	0.451	-0.645	0.135	0.097	0.054	0.039	0.799	-70	0.463	0.603	-0.166	-0.19	-0.064	0.471	-0.344	-0.212	-1.241	-2.14	0.534	0.094
0.127	-0.313	0.215	1.3	-1.767	0.169	0.751	0.295	0.241	-0.23	-0.209	-0.31	-0.583	-0.127	-0.224	0.534	-70	-0.271	0.821	0.04	0.276	-0.312	0.281	-0.01	-1.736	0.662	-0.183	0.677	0.088	-0.374	0.887	-0.377	-0.139	0.537	0.079	0.09	0.743	-70	0.575	0.475	-0.324	-0.235	-0.513	0.221	-0.508	-0.067	-1.505	-2.289	0.411	-0.121
-0.065	-0.192	0.223	1.559	-1.216	0.362	0.832	0.403	-0.074	-0.454	-0.486	-0.307	-0.463	-0.243	-0.59	0.473	-70	-0.325	0.633	0.122	-0.119	-0.494	-0.115	0.062	-1.454	0.371	0.022	0.618	0.131	-0.619	1.265	0.058	-0.38	0.785	0.039	0.128	0.668	-70	0.601	0.418	-0.345	-0.265	-0.803	0.039	-0.604	0.146	-1.544	-2.379	-0.038	-0.282
-0.146	0.009	0.276	1.757	-0.696	0.578	0.649	0.464	-0.279	-0.562	-0.767	-0.326	-0.136	-0.278	-0.803	0.387	-70	-0.348	0.489	0.164	-0.567	-0.726	-0.499	0.033	-1.156	0.122	0.22	0.426	0.148	-0.853	1.585	0.485	-0.537	0.814	-0.085	0.148	0.56	-70	0.528	0.46	-0.216	-0.303	-0.882	-0.044	-0.605	0.389	-1.337	-2.391	-0.68	-0.369
-0.124	0.227	0.39	1.838	-0.341	0.801	0.192	0.487	-0.367	-0.516	-0.923	-0.335	0.245	-0.266	-0.802	0.304	-70	-0.24	0.405	0.154	-1.026	-0.966	-0.807	-0.054	-0.895	0.022	0.397	0.215	0.14	-1.005	1.845	0.732	-0.602	0.666	-0.3	0.133	0.413	-70	0.375	0.571	0.032	-0.39	-0.808	-0.037	-0.496	0.623	-0.924	-2.335	-1.248	-0.365
-0.062	0.399	0.59	1.775	-0.175	1.009	-0.359	0.486	-0.357	-0.329	-0.921	-0.315	0.589	-0.237	-0.548	0.235	-70	0.018	0.405	0.089	-1.449	-1.158	-0.994	-0.164	-0.708	0.074	0.545	0.09	0.101	-0.997	2.034	0.701	-0.609	0.432	-0.588	0.024	0.236	-70	0.167	0.69	0.339	-0.552	-0.685	0.016	-0.278	0.809	-0.365	-2.247	-1.494	-0.258
-0.047	0.488	0.854	1.579	-0.086	1.178	-0.773	0.475	-0.269	-0.065	-0.757	-0.254	0.875	-0.208	-0.072	0.18	-70	0.369	0.512	-0.058	-1.783	-1.268	-1.045	-0.269	-0.605	0.174	0.665	0.088	0.029	-0.794	2.144	0.399	-0.611	0.222	-0.905	-0.256	0.059	-70	-0.079	0.759	0.634	-0.783	-0.578	0.055	0.01	0.909	0.239	-2.17	-1.292	-0.052
-0.133	0.486	1.096	1.289	0.097	1.283	-0.968	0.462	-0.136	0.188	-0.408	-0.147	1.077	-0.189	0.494	0.124	-70	0.711	0.718	-0.289	-1.979	-1.289	-0.985	-0.327	-0.574	0.228	0.764	0.191	-0.069	-0.443	2.166	-0.041	-0.659	0.137	-1.178	-0.702	-0.088	-70	-0.332	0.746	0.836	-1.04	-0.503	0.029	0.303	0.893	0.711	-2.136	-0.67	0.228
-0.288	0.409	1.21	0.951	0.468	1.305	-1.043	0.456	-0.011	0.358	0.13	0.011	1.119	-0.186	0.956	0.058	-70	0.936	0.98	-0.509	-2.01	-1.24	-0.856	-0.296	-0.585	0.233	0.852	0.371	-0.169	-0.032	2.103	-0.411	-0.786	0.211	-1.324	-1.157	-0.189	-70	-0.539	0.653	0.873	-1.261	-0.469	-0.084	0.557	0.749	0.867	-2.157	0.187	0.535
-0.398	0.282	1.156	0.604	0.949	1.243	-1.134	0.46	0.067	0.419	0.761	0.221	0.906	-0.211	1.159	-0.017	-70	0.975	1.227	-0.572	-1.878	-1.18	-0.705	-0.159	-0.609	0.235	0.933	0.605	-0.24	0.354	1.957	-0.537	-1.001	0.362	-1.272	-1.41	-0.262	-70	-0.643	0.507	0.716	-1.385	-0.51	-0.272	0.778	0.496	0.676	-2.218	0.983	0.818
-0.351	0.132	1.004	0.277	1.302	1.11	-1.288	0.48	0.104	0.393	1.301	0.474	0.413	-0.278	1.065	-0.09	-70	0.853	1.381	-0.4	-1.623	-1.174	-0.564	0.055	-0.616	0.216	0.999	0.834	-0.262	0.645	1.734	-0.38	-1.283	0.426	-0.999	-1.376	-0.35	-70	-0.608	0.355	0.414	-1.373	-0.642	-0.498	0.994	0.188	0.308	-2.285	1.456	1.025
-0.137	-0.021	0.887	-0.01	1.284	0.931	-1.448	0.518	0.162	0.328	1.57	0.744	-0.234	-0.391	0.754	-0.148	-70	0.682	1.389	-0.037	-1.311	-1.225	-0.453	0.302	-0.586	0.073	1.036	0.947	-0.232	0.788	1.445	-0.061	-1.583	0.279	-0.547	-1.18	-0.493	-70	-0.433	0.244	0.079	-1.216	-0.812	-0.714	1.2	-0.094	-0.007	-2.311	1.523	1.126
0.131	-0.155	0.898	-0.242	0.836	0.726	-1.521	0.579	0.308	0.27	1.493	0.993	-0.783	-0.541	0.359	-0.194	-70	0.577	1.237	0.397	-1.011	-1.262	-0.38	0.548	-0.511	-0.273	1.025	0.837	-0.167	0.754	1.117	0.226	-1.832	-0.055	-0.014	-1.032	-0.699	-70	-0.157	0.211	-0.179	-0.935	-0.907	-0.883	1.328	-0.271	-0.175	-2.249	1.303	1.113
0.306	-0.259	1.013	-0.421	0.162	0.504	-1.435	0.663	0.528	0.233	1.122	1.178	-0.984	-0.7	0.019	-0.235	-70	0.554	0.959	0.785	-0.782	-1.185	-0.353	0.769	-0.393	-0.771	0.952	0.5	-0.09	0.549	0.797	0.356	-1.96	-0.431	0.475	-1.055	-0.93	-70	0.13	0.278	-0.313	-0.573	-0.84	-0.982	1.273	-0.303	-0.244	-2.061	0.976	1.007
0.31	-0.331	1.126	-0.565	-0.409	0.267	-1.183	0.758	0.71	0.211	0.605	1.275	-0.747	-0.835	-0.164	-0.278	-70	0.536	0.62	1.053	-0.653	-0.973	-0.374	0.913	-0.243	-1.242	0.814	0.068	-0.022	0.218	0.542	0.348	-1.918	-0.7	0.817	-1.213	-1.124	-70	0.321	0.45	-0.35	-0.18	-0.616	-1.01	0.998	-0.21	-0.278	-1.733	0.638	0.845
0.143	-0.384	1.148	-0.707	-0.648	0.011	-0.843	0.84	0.726	0.185	0.107	1.281	-0.223	-0.913	-0.164	-0.319	-70	0.457	0.296	1.179	-0.627	-0.727	-0.437	0.896	-0.083	-1.491	0.628	-0.255	0.027	-0.162	0.398	0.313	-1.696	-0.824	0.965	-1.382	-1.229	-70	0.345	0.71	-0.362	0.197	-0.314	-0.985	0.598	-0.058	-0.276	-1.288	0.295	0.673
-0.167	-0.43	1.078	-0.872	-0.544	-0.256	-0.554	0.886	0.569	0.146	-0.243	1.222	0.291	-0.913	-0.052	-0.345	-70	0.333	0.052	1.196	-0.684	-0.589	-0.524	0.659	0.061	-1.428	0.421	-0.328	0.056	-0.489	0.385	0.354	-1.324	-0.861	0.932	-1.444	-1.229	-70	0.223	1.033	-0.419	0.525	-0.015	-0.933	0.269	0.076	-0.212	-0.775	-0.046	0.532
-0.555	-0.478	0.966	-1.055	-0.245	-0.518	-0.441	0.882	0.357	0.097	-0.378	1.13	0.543	-0.836	0.052	-0.349	-70	0.238	-0.073	1.167	-0.784	-0.593	-0.608	0.222	0.168	-1.1	0.23	-0.168	0.072	-0.667	0.492	0.507	-0.863	-0.889	0.778	-1.338	-1.147	-70	0.054	1.379	-0.561	0.786	0.24	-0.878	0.179	0.149	-0.107	-0.267	-0.318	0.448
-0.882	-0.52	0.838	-1.218	0.08	-0.748	-0.541	0.829	0.218	0.044	-0.286	1.032	0.476	-0.699	0.071	-0.331	-70	0.255	-0.072	1.144	-0.883	-0.622	-0.663	-0.294	0.231	-0.631	0.082	0.093	0.085	-0.662	0.674	0.745	-0.386	-0.928	0.576	-1.052	-1.032	-70	-0.044	1.707	-0.795	0.964	0.429	-0.832	0.361	0.17	-0.03	0.161	-0.44	0.44
-0.958	-0.546	0.685	-1.3	0.34	-0.918	-0.777	0.74	0.197	-0.013	-0.002	0.938	0.228	-0.534	0.015	-0.302	-70	0.438	0.035	1.127	-0.939	-0.537	-0.667	-0.718	0.255	-0.168	-0.009	0.301	0.108	-0.538	0.878	0.996	0.038	-0.935	0.388	-0.594	-0.926	-70	0.008	1.973	-1.089	1.053	0.524	-0.794	0.691	0.186	-0.036	0.451	-0.387	0.517
-0.677	-0.543	0.531	-1.251	0.522	-1.008	-1	0.632	0.259	-0.089	0.366	0.843	0.028	-0.374	-0.056	-0.272	-70	0.789	0.215	1.043	-0.919	-0.322	-0.604	-0.919	0.262	0.165	-0.043	0.36	0.144	-0.429	1.043	1.156	0.363	-0.862	0.256	-0.007	-0.846	-70	0.218	2.14	-1.346	1.06	0.504	-0.758	0.979	0.238	-0.114	0.58	-0.207	0.679
-0.121	-0.509	0.462	-1.058	0.649	-1.005	-1.065	0.524	0.346	-0.199	0.644	0.738	0.031	-0.244	-0.09	-0.239	-70	1.218	0.426	0.77	-0.802	-0.091	-0.469	-0.877	0.274	0.282	-0.03	0.242	0.185	-0.458	1.115	1.142	0.57	-0.725	0.202	0.584	-0.789	-70	0.541	2.19	-1.406	1.01	0.391	-0.718	1.084	0.325	-0.191	0.557	0.029	0.92
0.467	-0.438	0.538	-0.747	0.749	-0.906	-0.902	0.428	0.417	-0.352	0.676	0.625	0.214	-0.161	-0.072	-0.195	-70	1.561	0.627	0.257	-0.586	0.024	-0.277	-0.671	0.304	0.177	0.018	-0.013	0.213	-0.644	1.049	0.936	0.663	-0.597	0.234	0.978	-0.743	-70	0.905	2.128	-1.15	0.95	0.248	-0.67	0.986	0.391	-0.188	0.425	0.256	1.22
0.85	-0.326	0.679	-0.369	0.852	-0.719	-0.559	0.354	0.468	-0.546	0.439	0.528	0.401	-0.129	-0.023	-0.136	-70	1.673	0.776	-0.382	-0.286	-0.051	-0.057	-0.397	0.349	-0.059	0.088	-0.313	0.207	-0.865	0.825	0.603	0.659	-0.528	0.343	1.023	-0.704	-70	1.235	1.982	-0.63	0.927	0.149	-0.608	0.762	0.355	-0.081	0.241	0.409	1.545
0.937	-0.172	0.722	0.022	1.006	-0.458	-0.198	0.3	0.54	-0.763	0.068	0.487	0.409	-0.141	0.012	-0.075	-70	1.541	0.842	-0.899	0.062	-0.294	0.141	-0.116	0.392	-0.267	0.16	-0.559	0.162	-0.927	0.46	0.245	0.581	-0.49	0.506	0.744	-0.68	-70	1.443	1.799	-0.089	0.967	0.152	-0.517	0.519	0.154	0.105	0.07	0.438	1.846
0.779	0.008	0.582	0.39	1.272	-0.146	-0.016	0.253	0.686	-0.974	-0.232	0.535	0.197	-0.178	-0.038	-0.044	-70	1.262	0.809	-1.087	0.414	-0.59	0.266	0.142	0.415	-0.316	0.22	-0.709	0.089	-0.685	0.007	-0.054	0.448	-0.428	0.686	0.346	-0.691	-70	1.442	1.634	0.195	1.065	0.275	-0.385	0.343	-0.222	0.322	-0.035	0.346	2.06
0.465	0.178	0.35	0.712	1.68	0.186	-0.13	0.194	0.902	-1.145	-0.311	0.682	-0.113	-0.211	-0.217	-0.08	-70	0.939	0.681	-0.904	0.73	-0.77	0.281	0.349	0.406	-0.176	0.268	-0.805	0.011	-0.142	-0.459	-0.253	0.279	-0.345	0.84	0.075	-0.748	-70	1.206	1.53	0.111	1.193	0.461	-0.213	0.258	-0.721	0.506	-0.036	0.206	2.125
0.073	0.299	0.187	0.97	2.149	0.501	-0.498	0.107	1.099	-1.239	-0.147	0.899	-0.351	-0.209	-0.477	-0.202	-70	0.605	0.487	-0.457	0.988	-0.717	0.178	0.483	0.356	0.065	0.32	-0.926	-0.049	0.53	-0.858	-0.338	0.088	-0.303	0.935	0.059	-0.843	-70	0.812	1.514	-0.229	1.312	0.58	-0.025	0.222	-1.254	0.599	0.076	0.12	2.01
-0.283	0.345	0.154	1.148	2.48	0.762	-0.949	-0.01	1.17	-1.235	0.164	1.134	-0.427	-0.156	-0.69	-0.396	-70	0.262	0.275	0.108	1.182	-0.432	-0.012	0.523	0.258	0.268	0.405	-1.122	-0.081	1.066	-1.138	-0.318	-0.117	-0.326	0.956	0.272	-0.95	-70	0.414	1.582	-0.588	1.393	0.504	0.141	0.161	-1.73	0.602	0.287	0.157	1.727
-0.425	0.325	0.165	1.234	2.472	0.935	-1.283	-0.141	1.08	-1.137	0.478	1.334	-0.363	-0.063	-0.753	-0.621	-70	-0.045	0.098	0.674	1.317	-0.01	-0.227	0.45	0.102	0.339	0.548	-1.373	-0.078	1.249	-1.278	-0.199	-0.332	-0.363	0.907	0.594	-1.035	-70	0.138	1.706	-0.779	1.429	0.213	0.243	0.033	-2.087	0.598	0.571	0.322	1.339
-0.238	0.277	0.111	1.229	2.085	0.996	-1.374	-0.266	0.886	-0.984	0.703	1.467	-0.249	0.04	-0.69	-0.829	-70	-0.233	-0.004	1.149	1.388	0.443	-0.39	0.269	-0.114	0.262	0.753	-1.605	-0.04	1.034	-1.295	0.028	-0.557	-0.347	0.813	0.894	-1.067	-70	0.001	1.84	-0.762	1.439	-0.176	0.259	-0.135	-2.305	0.673	0.894	0.566	0.937
0.182	0.25	0.006	1.145	1.476	0.932	-1.218	-0.364	0.665	-0.826	0.842	1.53	-0.168	0.116	-0.615	-0.988	-70	-0.248	-0.023	1.455	1.386	0.865	-0.448	0.05	-0.373	0.07	1.001	-1.728	0.039	0.568	-1.232	0.347	-0.787	-0.259	0.7	1.064	-1.032	-70	-0.063	1.94	-0.63	1.458	-0.485	0.19	-0.246	-2.404	0.84	1.217	0.804	0.603
0.542	0.276	-0.03	1.002	0.87	0.741	-0.899	-0.424	0.446	-0.709	0.962	1.541	-0.163	0.139	-0.611	-1.082	-70	-0.119	0.019	1.545	1.298	1.226	-0.392	-0.085	-0.631	-0.21	1.258	-1.662	0.161	0.063	-1.141	0.661	-1.007	-0.114	0.59	1.071	-0.933	-70	-0.127	1.983	-0.497	1.519	-0.595	0.054	-0.173	-2.422	1.045	1.503	0.942	0.384
0.577	0.355	0.09	0.82	0.396	0.445	-0.525	-0.445	0.211	-0.649	1.112	1.526	-0.22	0.101	-0.674	-1.112	-70	0.066	0.079	1.448	1.123	1.485	-0.269	-0.052	-0.829	-0.564	1.488	-1.358	0.324	-0.331	-1.073	0.8	-1.191	0.063	0.493	0.976	-0.789	-70	-0.214	1.964	-0.424	1.634	-0.483	-0.13	0.164	-2.41	1.218	1.718	0.927	0.279
0.264	0.456	0.304	0.619	0.054	0.085	-0.177	-0.433	-0.05	-0.628	1.286	1.49	-0.249	0.012	-0.763	-1.084	-70	0.214	0.118	1.302	0.888	1.575	-0.15	0.125	-0.909	-0.96	1.658	-0.846	0.51	-0.557	-1.067	0.63	-1.307	0.211	0.41	0.892	-0.625	-70	-0.309	1.891	-0.403	1.787	-0.214	-0.346	0.709	-2.407	1.305	1.842	0.79	0.246
-0.17	0.537	0.461	0.415	-0.177	-0.273	0.103	-0.393	-0.326	-0.602	1.443	1.422	-0.12	-0.115	-0.843	-0.998	-70	0.26	0.113	1.263	0.64	1.458	-0.099	0.332	-0.835	-1.311	1.737	-0.265	0.686	-0.618	-1.138	0.156	-1.334	0.213	0.337	0.9	-0.466	-70	-0.383	1.766	-0.383	1.934	0.09	-0.581	1.261	-2.439	1.273	1.879	0.6	0.224
-0.44	0.565	0.48	0.221	-0.265	-0.553	0.281	-0.332	-0.579	-0.521	1.516	1.295	0.232	-0.263	-0.877	-0.855	-70	0.187	0.065	1.357	0.436	1.192	-0.138	0.448	-0.606	-1.49	1.7	0.184	0.813	-0.558	-1.273	-0.487	-1.267	-0.023	0.261	1.009	-0.326	-70	-0.409	1.584	-0.297	2.021	0.318	-0.81	1.582	-2.511	1.148	1.853	0.383	0.162
-0.385	0.531	0.432	0.046	-0.174	-0.686	0.301	-0.254	-0.738	-0.343	1.427	1.089	0.689	-0.412	-0.807	-0.661	-70	0.028	-0.01	1.443	0.32	0.94	-0.24	0.407	-0.264	-1.401	1.542	0.358	0.862	-0.461	-1.432	-1.112	-1.127	-0.481	0.165	1.182	-0.207	-70	-0.371	1.341	-0.103	2.006	0.423	-1.008	1.537	-2.613	1.049	1.798	0.09	0.034
-0.019	0.451	0.452	-0.107	0.038	-0.642	0.118	-0.166	-0.714	-0.056	1.14	0.803	0.984	-0.547	-0.589	-0.436	-70	-0.139	-0.095	1.365	0.299	0.866	-0.361	0.206	0.12	-1.085	1.292	0.267	0.822	-0.408	-1.562	-1.537	-0.956	-1.044	0.029	1.378	-0.1	-70	-0.268	1.046	0.166	1.873	0.446	-1.167	1.166	-2.724	1.125	1.742	-0.308	-0.15
0.546	0.353	0.583	-0.233	0.22	-0.445	-0.26	-0.078	-0.487	0.313	0.74	0.463	0.89	-0.652	-0.237	-0.208	-70	-0.219	-0.181	1.101	0.339	1.013	-0.464	-0.122	0.46	-0.716	1.019	0.065	0.71	-0.401	-1.613	-1.624	-0.802	-1.559	-0.158	1.559	0.007	-70	-0.112	0.727	0.38	1.635	0.458	-1.301	0.626	-2.821	1.414	1.707	-0.713	-0.361
1.164	0.262	0.715	-0.315	0.229	-0.166	-0.752	0.001	-0.157	0.703	0.411	0.108	0.396	-0.718	0.17	-0.01	-70	-0.15	-0.273	0.762	0.384	1.269	-0.542	-0.524	0.687	-0.464	0.813	-0.075	0.566	-0.354	-1.559	-1.336	-0.703	-1.884	-0.384	1.666	0.128	-70	0.081	0.423	0.391	1.329	0.506	-1.437	0.087	-2.883	1.77	1.707	-0.942	-0.563
1.68	0.197	0.676	-0.325	0.029	0.104	-1.241	0.072	0.113	1.027	0.295	-0.215	-0.282	-0.739	0.515	0.14	-70	0.046	-0.379	0.484	0.379	1.461	-0.611	-0.928	0.774	-0.365	0.755	-0.071	0.443	-0.177	-1.4	-0.801	-0.672	-1.924	-0.615	1.619	0.268	-70	0.299	0.16	0.156	1.002	0.595	-1.59	-0.325	-2.901	1.963	1.744	-0.878	-0.731
1.946	0.169	0.387	-0.242	-0.294	0.301	-1.611	0.149	0.232	1.199	0.352	-0.465	-0.834	-0.712	0.674	0.245	-70	0.249	-0.503	0.365	0.302	1.506	-0.694	-1.248	0.746	-0.319	0.88	0.034	0.384	0.134	-1.164	-0.294	-0.694	-1.71	-0.799	1.344	0.426	-70	0.531	-0.053	-0.2	0.693	0.709	-1.742	-0.547	-2.882	1.847	1.817	-0.578	-0.849
1.868	0.184	-0.055	-0.069	-0.593	0.407	-1.8	0.256	0.231	1.164	0.378	-0.61	-1.01	-0.638	0.567	0.326	-70	0.31	-0.64	0.449	0.173	1.462	-0.798	-1.403	0.664	-0.219	1.162	0.141	0.409	0.482	-0.895	-0.084	-0.735	-1.428	-0.896	0.857	0.588	-70	0.748	-0.221	-0.477	0.428	0.822	-1.848	-0.589	-2.844	1.436	1.914	-0.211	-0.918
1.477	0.237	-0.469	0.15	-0.749	0.455	-1.816	0.413	0.169	0.916	0.185	-0.63	-0.751	-0.526	0.209	0.405	-70	0.153	-0.778	0.693	0.044	1.453	-0.907	-1.34	0.599	-0.043	1.532	0.182	0.503	0.73	-0.646	-0.247	-0.764	-1.315	-0.9	0.289	0.743	-70	0.912	-0.351	-0.553	0.213	0.897	-1.866	-0.542	-2.804	0.854	2.023	0.08	-0.945
0.914	0.314	-0.746	0.352	-0.747	0.497	-1.709	0.623	0.043	0.507	-0.233	-0.529	-0.225	-0.392	-0.29	0.492	-70	-0.19	-0.907	0.959	-0.023	1.545	-1.003	-1.044	0.603	0.152	1.911	0.191	0.63	0.769	-0.449	-0.613	-0.762	-1.466	-0.847	-0.201	0.885	-70	0.992	-0.439	-0.469	0.04	0.903	-1.789	-0.522	-2.765	0.24	2.14	0.25	-0.944
0.335	0.393	-0.914	0.482	-0.684	0.57	-1.5	0.862	-0.19	0.024	-0.682	-0.33	0.264	-0.261	-0.797	0.575	-70	-0.631	-1.033	1.077	0.016	1.696	-1.07	-0.561	0.694	0.283	2.236	0.272	0.746	0.572	-0.306	-0.91	-0.731	-1.759	-0.795	-0.539	1.013	-70	0.968	-0.473	-0.36	-0.109	0.829	-1.648	-0.561	-2.712	-0.294	2.274	0.318	-0.928
-0.182	0.447	-1.05	0.528	-0.712	0.672	-1.161	1.09	-0.508	-0.433	-0.91	-0.075	0.483	-0.155	-1.216	0.632	-70	-1.09	-1.173	0.97	0.171	1.796	-1.111	-0.018	0.863	0.273	2.475	0.478	0.827	0.207	-0.186	-0.98	-0.677	-1.948	-0.791	-0.753	1.13	-70	0.825	-0.452	-0.327	-0.254	0.667	-1.499	-0.563	-2.615	-0.662	2.433	0.322	-0.897
-0.626	0.458	-1.165	0.518	-0.94	0.757	-0.672	1.266	-0.802	-0.791	-0.79	0.186	0.421	-0.088	-1.483	0.639	-70	-1.483	-1.339	0.703	0.421	1.752	-1.13	0.405	1.082	0.09	2.617	0.728	0.871	-0.177	-0.042	-0.874	-0.607	-1.845	-0.847	-0.883	1.223	-70	0.558	-0.39	-0.364	-0.41	0.411	-1.395	-0.411	-2.452	-0.805	2.616	0.31	-0.849
-0.996	0.413	-1.206	0.502	-1.333	0.756	-0.081	1.366	-0.941	-1.022	-0.388	0.407	0.271	-0.064	-1.55	0.586	-70	-1.701	-1.524	0.419	0.721	1.517	-1.12	0.565	1.319	-0.221	2.658	0.859	0.894	-0.427	0.154	-0.742	-0.527	-1.446	-0.943	-0.912	1.261	-70	0.221	-0.317	-0.388	-0.585	0.083	-1.363	-0.095	-2.225	-0.717	2.8	0.33	-0.784
-1.29	0.316	-1.142	0.514	-1.709	0.61	0.51	1.388	-0.872	-1.145	0.115	0.561	0.258	-0.079	-1.417	0.475	-70	-1.639	-1.698	0.208	1.021	1.101	-1.054	0.447	1.54	-0.548	2.593	0.771	0.918	-0.486	0.394	-0.672	-0.455	-0.912	-1.049	-0.809	1.216	-70	-0.063	-0.259	-0.324	-0.777	-0.231	-1.394	0.283	-1.967	-0.472	2.954	0.393	-0.714
-1.524	0.182	-1.01	0.561	-1.833	0.299	1	1.342	-0.629	-1.201	0.564	0.646	0.452	-0.121	-1.157	0.317	-70	-1.274	-1.826	0.053	1.275	0.58	-0.904	0.181	1.715	-0.775	2.412	0.503	0.955	-0.439	0.635	-0.637	-0.42	-0.433	-1.14	-0.62	1.084	-70	-0.175	-0.22	-0.151	-0.974	-0.414	-1.455	0.601	-1.719	-0.206	3.054	0.447	-0.662
-1.699	0.041	-0.863	0.621	-1.576	-0.144	1.324	1.25	-0.294	-1.225	0.905	0.679	0.722	-0.178	-0.892	0.133	-70	-0.696	-1.884	-0.1	1.445	0.107	-0.663	-0.02	1.825	-0.854	2.112	0.169	1.003	-0.449	0.827	-0.571	-0.451	-0.106	-1.208	-0.472	0.903	-70	-0.11	-0.186	0.092	-1.158	-0.394	-1.503	0.771	-1.514	-0.053	3.098	0.409	-0.648
-1.745	-0.072	-0.736	0.665	-0.997	-0.634	1.459	1.145	0.024	-1.23	1.133	0.682	0.849	-0.231	-0.726	-0.047	-70	-0.084	-1.879	-0.252	1.505	-0.163	-0.365	0.005	1.87	-0.823	1.712	-0.131	1.05	-0.638	0.939	-0.458	-0.556	0.074	-1.249	-0.472	0.74	-70	0.015	-0.141	0.337	-1.309	-0.196	-1.509	0.732	-1.349	-0.092	3.106	0.256	-0.667
-1.574	-0.128	-0.66	0.676	-0.306	-1.068	1.432	1.067	0.224	-1.206	1.207	0.672	0.719	-0.257	-0.696	-0.189	-70	0.368	-1.838	-0.356	1.443	-0.179	-0.072	0.254	1.869	-0.776	1.257	-0.358	1.086	-0.997	0.973	-0.354	-0.718	0.143	-1.267	-0.598	0.661	-70	0.059	-0.084	0.521	-1.413	0.071	-1.468	0.446	-1.203	-0.326	3.104	0.07	-0.688
-1.189	-0.117	-0.677	0.655	0.273	-1.357	1.311	1.057	0.26	-1.14	1.066	0.65	0.395	-0.241	-0.77	-0.263	-70	0.517	-1.795	-0.4	1.278	-0.035	0.15	0.558	1.847	-0.801	0.814	-0.531	1.102	-1.387	0.953	-0.335	-0.897	0.132	-1.266	-0.701	0.694	-70	-0.04	-0.037	0.591	-1.454	0.276	-1.398	-0.052	-1.051	-0.669	3.114	-0.024	-0.672
-0.721	-0.056	-0.783	0.615	0.621	-1.455	1.169	1.134	0.187	-1.035	0.729	0.604	0.021	-0.174	-0.867	-0.262	-70	0.336	-1.77	-0.434	1.051	0.1	0.267	0.689	1.827	-0.924	0.452	-0.677	1.092	-1.614	0.906	-0.422	-1.039	0.069	-1.248	-0.657	0.815	-70	-0.26	-0.036	0.51	-1.413	0.363	-1.334	-0.639	-0.896	-0.959	3.146	0.031	-0.589
-0.37	0.023	-0.901	0.572	0.748	-1.364	1.021	1.284	0.114	-0.916	0.357	0.52	-0.321	-0.058	-0.883	-0.204	-70	-0.05	-1.767	-0.498	0.821	0.098	0.286	0.524	1.822	-1.089	0.214	-0.788	1.049	-1.543	0.847	-0.554	-1.098	-0.015	-1.218	-0.477	0.964	-70	-0.558	-0.104	0.263	-1.271	0.404	-1.302	-1.144	-0.769	-1.03	3.209	0.149	-0.443
-0.273	0.085	-0.934	0.525	0.737	-1.137	0.813	1.456	0.126	-0.813	0.152	0.393	-0.623	0.097	-0.719	-0.127	-70	-0.414	-1.774	-0.565	0.634	-0.052	0.245	0.154	1.832	-1.194	0.104	-0.819	0.959	-1.175	0.777	-0.662	-1.045	-0.075	-1.174	-0.271	1.075	-70	-0.905	-0.238	-0.123	-1.017	0.553	-1.319	-1.42	-0.715	-0.825	3.306	0.163	-0.254
-0.419	0.114	-0.841	0.456	0.658	-0.851	0.495	1.589	0.241	-0.747	0.188	0.235	-0.866	0.274	-0.338	-0.073	-70	-0.586	-1.782	-0.573	0.517	-0.269	0.198	-0.177	1.853	-1.157	0.082	-0.752	0.808	-0.633	0.699	-0.762	-0.884	-0.057	-1.118	-0.11	1.098	-70	-1.252	-0.41	-0.551	-0.672	0.879	-1.383	-1.414	-0.766	-0.47	3.434	-0.038	-0.045
-0.641	0.116	-0.658	0.337	0.526	-0.587	0.088	1.638	0.429	-0.72	0.354	0.073	-0.973	0.447	0.186	-0.073	-70	-0.576	-1.794	-0.511	0.47	-0.445	0.188	-0.255	1.876	-0.988	0.087	-0.631	0.595	-0.089	0.621	-0.936	-0.648	0.075	-1.055	0.028	1.011	-70	-1.513	-0.572	-0.887	-0.3	1.268	-1.482	-1.212	-0.93	-0.187	3.567	-0.412	0.177
-0.713	0.111	-0.462	0.145	0.318	-0.397	-0.291	1.594	0.616	-0.713	0.463	-0.059	-0.874	0.586	0.683	-0.138	-70	-0.523	-1.824	-0.438	0.482	-0.524	0.238	-0.051	1.891	-0.784	0.063	-0.524	0.338	0.328	0.564	-1.21	-0.389	0.273	-0.999	0.189	0.82	-70	-1.584	-0.685	-1.05	0.006	1.48	-1.593	-0.985	-1.19	-0.119	3.661	-0.796	0.417
-0.506	0.122	-0.334	-0.121	0.048	-0.297	-0.501	1.492	0.701	-0.696	0.401	-0.134	-0.596	0.661	0.987	-0.262	-70	-0.543	-1.894	-0.435	0.545	-0.525	0.347	0.292	1.883	-0.65	-0.019	-0.455	0.073	0.563	0.545	-1.485	-0.162	0.402	-0.962	0.381	0.551	-70	-1.406	-0.724	-1.069	0.162	1.338	-1.695	-0.874	-1.508	-0.219	3.657	-1.039	0.671
-0.072	0.156	-0.324	-0.44	-0.182	-0.264	-0.458	1.389	0.594	-0.638	0.199	-0.143	-0.273	0.652	1.069	-0.423	-70	-0.648	-2.019	-0.535	0.662	-0.504	0.489	0.591	1.841	-0.593	-0.161	-0.417	-0.161	0.632	0.559	-1.617	0.001	0.345	-0.949	0.576	0.24	-70	-0.99	-0.683	-1.054	0.137	0.878	-1.776	-0.912	-1.829	-0.322	3.516	-1.069	0.911
0.405	0.207	-0.419	-0.776	-0.242	-0.257	-0.167	1.345	0.297	-0.517	-0.014	-0.11	-0.052	0.552	1.049	-0.592	-70	-0.795	-2.191	-0.692	0.839	-0.509	0.621	0.747	1.76	-0.52	-0.334	-0.408	-0.346	0.6	0.589	-1.554	0.09	0.115	-0.954	0.724	-0.063	-70	-0.415	-0.57	-1.112	-0.036	0.339	-1.833	-1.057	-2.077	-0.318	3.24	-0.872	1.086
0.76	0.255	-0.54	-1.091	-0.092	-0.239	0.281	1.395	-0.074	-0.319	-0.133	-0.082	-0.009	0.363	1.065	-0.74	-70	-0.961	-2.386	-0.828	1.078	-0.567	0.699	0.748	1.648	-0.343	-0.487	-0.418	-0.492	0.547	0.619	-1.4	0.116	-0.147	-0.968	0.764	-0.31	-70	0.207	-0.399	-1.29	-0.272	-0.011	-1.865	-1.275	-2.183	-0.228	2.881	-0.483	1.139
0.931	0.276	-0.605	-1.349	0.154	-0.186	0.745	1.543	-0.371	-0.042	-0.161	-0.112	-0.12	0.098	1.13	-0.844	-70	-1.164	-2.569	-0.908	1.37	-0.701	0.692	0.615	1.516	-0.073	-0.567	-0.407	-0.631	0.511	0.654	-1.337	0.101	-0.27	-0.988	0.657	-0.461	-70	0.753	-0.192	-1.558	-0.485	-0.069	-1.86	-1.543	-2.103	-0.135	2.512	-0.015	1.044
0.921	0.255	-0.586	-1.518	0.3	-0.097	1.067	1.764	-0.518	0.309	-0.196	-0.234	-0.318	-0.223	1.117	-0.899	-70	-1.423	-2.71	-0.985	1.693	-0.913	0.597	0.356	1.376	0.198	-0.531	-0.329	-0.799	0.472	0.732	-1.47	0.062	-0.187	-1.028	0.4	-0.497	-70	1.107	0.021	-1.816	-0.628	0.047	-1.799	-1.799	-1.843	-0.083	2.189	0.36	0.818
0.725	0.194	-0.512	-1.569	0.225	0.007	1.138	2.02	-0.552	0.72	-0.315	-0.439	-0.559	-0.568	0.902	-0.917	-70	-1.712	-2.797	-1.152	2.02	-1.161	0.422	-0.015	1.234	0.379	-0.365	-0.199	-1.022	0.375	0.905	-1.732	0.011	0.016	-1.11	0.003	-0.42	-70	1.192	0.196	-1.944	-0.71	0.122	-1.661	-1.923	-1.453	-0.062	1.914	0.519	0.528
0.347	0.119	-0.43	-1.491	-0.033	0.097	0.947	2.275	-0.579	1.179	-0.5	-0.673	-0.866	-0.895	0.475	-0.927	-70	-1.95	-2.836	-1.44	2.329	-1.364	0.179	-0.46	1.098	0.424	-0.092	-0.076	-1.307	0.177	1.21	-1.927	-0.048	0.164	-1.26	-0.528	-0.252	-70	1.013	0.293	-1.888	-0.788	0.004	-1.446	-1.842	-1.012	-0.07	1.641	0.463	0.263
-0.124	0.067	-0.345	-1.3	-0.305	0.145	0.602	2.501	-0.68	1.668	-0.66	-0.862	-1.274	-1.158	-0.076	-0.963	-70	-2.026	-2.846	-1.763	2.605	-1.449	-0.132	-0.899	0.983	0.333	0.237	-0.001	-1.645	-0.121	1.65	-1.896	-0.118	0.137	-1.487	-1.135	-0.024	-70	0.666	0.291	-1.716	-0.927	-0.336	-1.181	-1.607	-0.591	-0.147	1.308	0.271	0.103
-0.493	0.066	-0.21	-1.04	-0.404	0.14	0.311	2.686	-0.821	2.167	-0.698	-0.944	-1.727	-1.328	-0.632	-1.044	step	-1.832	-2.844	-1.956	2.841	-1.368	-0.504	-1.211	0.908	0.147	0.565	0.056	-2.02	-0.469	2.188	-1.614	-0.2	-0.002	-1.779	-1.632	0.229	step	0.309	0.202	-1.561	-1.159	-0.817	-0.907	-1.329	-0.239	-0.319	0.88	0.026	0.089
-0.556		0.027		-0.241		0.297		-0.871		-0.544		-2.024		-1.076		step	-1.295		-1.903		-1.081		-1.269		-0.054		0.136		-0.783		-1.163		-0.029		-1.763		step	0.073	0	-1.478		-1.268		-1.04		-0.527		-0.213
-0.26		0.325		0.11		0.666		-0.724		-0.194		-1.948		-1.302		step	-0.456		-1.632		-0.592		-1.017		-0.199		0.214		-0.995		-0.663		0.257		-1.406		step	-0.01	0	-1.383		-1.496		-0.681		-0.654		-0.398
0.224		0.537		0.444		1.287		-0.448		0.252		-1.474		-1.271		step	0.461		-1.312		-0.019		-0.57		-0.287		0.213		-1.093		-0.248		0.819		-0.744		step	-0.034	0	-1.175		-1.433		-0.251		-0.627		-0.507
0.598		0.504		0.553		1.856		-0.245		0.614		-0.84		-1.041		step	1.127		-1.124		0.418		-0.162		-0.381		0.114		-1.089		-0.05		1.402		-0.17		step	-0.151	0	-0.879		-1.217		0.11		-0.461		-0.546
0.654		0.206		0.384		2.112		-0.262		0.754		-0.373		-0.714		step	1.341		-1.124		0.549		0.028		-0.511		0.02		-0.963		-0.131		1.752		0.009		step	-0.459	0	-0.628		-1.092		0.24		-0.213		-0.514
0.401		-0.224		0.067		2.01		-0.467		0.689		-0.242		-0.388		step	1.175		-1.227		0.39		0.013		-0.626		0.054		-0.681		-0.448		1.814		-0.22		step	-0.916	0	-0.52		-1.201		0.119		0.056		-0.4
0.019		-0.595		-0.212		1.703		-0.735		0.562		-0.37		-0.121		step	0.875		-1.313		0.077		-0.059		-0.673		0.191		-0.288		-0.889		1.685		-0.648		step	-1.353	0	-0.526		-1.496		-0.116		0.256		-0.213
-0.288		-0.768		-0.341		1.384		-0.992		0.525		-0.547		0.088		step	0.643		-1.335		-0.293		-0.05		-0.675		0.252		0.061		-1.316		1.465		-1.045		step	-1.558	0	-0.512		-1.802		-0.297		0.272		-0.012
-0.406		-0.688		-0.325		1.148		-1.239		0.632		-0.612		0.287		step	0.519		-1.345		-0.715		0.089		-0.722		0.077		0.201		-1.602		1.173		-1.277		step	-1.408	0	-0.35		-1.974		-0.342		0.045		0.138
-0.339		-0.384		-0.231		0.959		-1.472		0.818		-0.539		0.48		step	0.436		-1.424		-1.165		0.325		-0.878		-0.317		0.09		-1.664		0.797		-1.322		step	-0.946	0	-0.028		-1.991		-0.257		-0.357		0.236
-0.169		0.042		-0.118		0.72		-1.635		0.948		-0.393		0.559		step	0.35		-1.594		-1.515		0.558		-1.12		-0.736		-0.19		-1.511		0.369		-1.244		step	-0.354	0	0.31		-1.919		-0.096		-0.8		0.35
-0.008		0.455		0.002		0.374		-1.67		0.922		-0.248		0.381		step	0.304		-1.783		-1.601		0.664		-1.359		-0.948		-0.52		-1.259		-0.018		-1.169		step	0.173	0	0.455		-1.802		0.085		-1.181		0.567
0.047		0.74		0.146		-0.044		-1.563		0.748		-0.151		-0.059		step	0.377		-1.885		-1.358		0.592		-1.516		-0.839		-0.811		-1.075		-0.241		-1.218		step	0.526	0	0.286		-1.596		0.24		-1.454		0.917
-0.037		0.827		0.326		-0.442		-1.34		0.537		-0.112		-0.579		step	0.572		-1.848		-0.88		0.452		-1.549		-0.502		-0.993		-1.071		-0.195		-1.413		step	0.715	0	-0.143		-1.227		0.356		-1.579		1.34
-0.219		0.684		0.531		-0.756		-1.033		0.412		-0.115		-0.933		step	0.794		-1.726		-0.352		0.446		-1.46		-0.199		-0.994		-1.248		0.138		-1.639		step	0.823	0	-0.636		-0.686		0.449		-1.51		1.697
-0.413		0.313		0.715		-1.009		-0.68		0.376		-0.143		-1.009		-70	0.914		-1.628		0.05		0.654		-1.319		-0.198		-0.772		-1.532		0.639		-1.739		-70	0.915	0	-0.96		-0.074		0.534		-1.272		1.82
-0.562		-0.25		0.774		-1.278		-0.351		0.291		-0.208		-0.889		-70	0.861		-1.626		0.204		0.902		-1.252		-0.62		-0.376		-1.845		1.078		-1.677		-70	0.956	0	-0.991		0.431		0.569		-1.003		1.579
-0.666		-0.927		0.587		-1.586		-0.133		0.001		-0.317		-0.747		-70	0.657		-1.693		0.077		0.901		-1.337		-1.349		0.041		-2.115		1.256		-1.57		-70	0.844	0	-0.785		0.656		0.458		-0.839		0.971
-0.732		-1.589		0.15		-1.821		-0.065		-0.477		-0.417		-0.677		-70	0.403		-1.704		-0.217		0.52		-1.484		-2.065		0.315		-2.244		1.154		-1.567		-70	0.555	0	-0.538		0.527		0.094		-0.771		0.145
-0.726		-2.083		-0.355		-1.781		-0.097		-0.907		-0.433		-0.627		-70	0.224		-1.522		-0.449		-0.077		-1.486		-2.413		0.371		-2.133		0.921		-1.718		-70	0.214	0	-0.466		0.089		-0.631		-0.657		-0.673
-0.606		-2.304		-0.707		-1.325		-0.137		-0.988		-0.371		-0.492		-70	0.204		-1.111		-0.429		-0.589		-1.207		-2.236		0.262		-1.773		0.69		-1.962		-70	-0.012	0	-0.72		-0.553		-1.844		-0.404		-1.334
-0.368		-2.243		-0.845		-0.502		-0.124		-0.589		-0.34		-0.246		-70	0.356		-0.592		-0.155		-0.845		-0.721		-1.687		0.119		-1.293		0.451		-2.173		-70	-0.088	0	-1.336		-1.307		-3.666		-0.088		-1.889
-0.059		-1.956		-0.873		0.424		-0.078		0.143		-0.431		0.014		-70	0.632		-0.197		0.174		-0.899		-0.261		-1.096		0.071		-0.863		0.117		-2.207		-70	-0.126	0	-2.219		-2.135		-6.148		0.115		-2.603
0.246		-1.536		-0.869		1.107		-0.078		0.866		-0.604		0.126		-70	0.934		-0.136		0.279		-0.925		-0.047		-0.723		0.185		-0.583		-0.324		-1.97		-70	-0.279	0	-3.182		-3.035		-9.219		0.077		-3.849
0.465		-1.114		-0.782		1.32		-0.19		1.27		-0.716		-0.033		-70	1.137		-0.452		-0.041		-1.034		-0.155		-0.596		0.423		-0.46		-0.755		-1.508		-70	-0.637	0	-4.028		-3.965		-12.681		-0.203		-5.922
0.541		-0.832		-0.515		1.094		-0.401		1.253		-0.655		-0.479		-70	1.153		-0.981		-0.797		-1.216		-0.479		-0.553		0.655		-0.488		-0.994		-1.007		-70	-1.212	0	-4.623		-4.776		-16.231		-0.622		-8.881
0.497		-0.777		-0.077		0.67		-0.629		0.944		-0.449		-1.093		-70	0.975		-1.443		-1.81		-1.4		-0.825		-0.411		0.711		-0.709		-0.914		-0.654		-70	-1.951	0	-4.916		-5.243		-19.531		-1.045		-12.52
0.439		-0.944		0.372		0.306		-0.786		0.58		-0.228		-1.675		-70	0.647		-1.616		-2.802		-1.531		-1.047		-0.115		0.48		-1.171		-0.505		-0.494		-70	-2.739	0	-4.909		-5.23		-22.275		-1.368		-16.49
0.478		-1.249		0.616		0.122		-0.818		0.349		-0.111		-2.028		-70	0.198		-1.436		-3.514		-1.579		-1.122		0.237		-0.003		-1.835		0.108		-0.423		-70	-3.442	0	-4.63		-4.811		-24.244		-1.557		-20.494
0.616		-1.588		0.534		0.099		-0.727		0.304		-0.105		-2.04		-70	-0.363		-1.005		-3.802		-1.531		-1.103		0.49		-0.543		-2.526		0.715		-0.317		-70	-3.964	0	-4.143		-4.238		-25.323		-1.633		-24.387
0.734		-1.84		0.176		0.18		-0.578		0.375		-0.129		-1.717		-70	-0.978		-0.512		-3.677		-1.388		-1.02		0.534		-0.878		-2.99		1.11		-0.162		-70	-4.274	0	-3.568		-3.772		-25.516		-1.666		-28.095
0.708		-1.877		-0.298		0.338		-0.475		0.446		-0.101		-1.173		-70	-1.51		-0.151		-3.285		-1.18		-0.837		0.358		-0.828		-3.05		1.202		-0.039		-70	-4.367	0	-3.057		-3.544		-24.976		-1.812		-31.427
0.514	-14.116	-1.617	-14.911	-0.756	-11.943	0.528	-10.073	-0.503	-14.857	0.439	-22.982	0.011	-27.19	-0.586	-28.395	-70	-1.799	-14.335	-0.014	-9.023	-2.827	-14.91	-0.938	-11.042	-0.514	-19.482	0.054	-29.447	-0.406	-28.271	-2.755	-22.963	1.058	-23.971	-0.016	-22.311	-70	-4.228	-16.654	-2.704	-16.753	-3.52	-18.814	-23.963	-34.588	-2.264	-11.203	-33.996	-20.529
0.215	-12.96	-1.109	-13.366	-1.171	-10.566	0.654	-9.237	-0.675	-13.447	0.343	-21.298	0.191	-25.219	-0.105	-26.438	-70	-1.769	-13.689	-0.024	-8.294	-2.456	-13.834	-0.682	-10.098	-0.112	-17.891	-0.243	-27.774	0.202	-26.331	-2.382	-21.387	0.86	-22.058	-0.08	-20.503	-70	-3.877	-16.478	-2.495	-16.45	-3.553	-18.104	-22.731	-35.288	-3.11	-10.825	-35.365	-20.595
-0.132	-11.598	-0.524	-11.706	-1.555	-9.051	0.611	-8.36	-0.896	-11.829	0.189	-19.367	0.406	-22.936	0.208	-24.165	-70	-1.485	-13.004	0.012	-7.494	-2.209	-12.57	-0.415	-8.975	0.187	-16.105	-0.442	-25.796	0.752	-24.09	-2.243	-19.563	0.783	-19.908	-0.183	-18.404	-70	-3.415	-16.237	-2.35	-16.082	-3.469	-17.298	-21.4	-35.937	-4.207	-10.435	-35.302	-20.698
-0.527	-10.166	-0.05	-10.092	-1.875	-7.583	0.399	-7.56	-1.008	-10.198	0.016	-17.391	0.616	-20.581	0.369	-21.773	-70	-1.105	-12.363	0.238	-6.733	-2.019	-11.259	-0.142	-7.834	0.219	-14.32	-0.567	-23.752	1.08	-21.795	-2.466	-17.692	0.89	-17.764	-0.305	-16.219	-70	-2.996	-16.002	-2.21	-15.795	-3.148	-16.526	-19.915	-36.679	-5.241	-10.128	-33.906	-20.923
-0.959	-8.792	0.222	-8.622	-2.021	-6.312	0.15	-6.894	-0.885	-8.713	-0.143	-15.516	0.786	-18.336	0.403	-19.393	-70	-0.786	-11.82	0.604	-6.076	-1.787	-10.045	0.12	-6.817	-0.01	-12.68	-0.712	-21.834	1.159	-19.617	-2.931	-15.922	1.124	-15.802	-0.458	-14.131	-70	-2.729	-15.829	-2.08	-15.686	-2.58	-15.876	-18.148	-37.606	-5.926	-9.958	-31.518	-21.298
-1.333	-7.573	0.322	-7.334	-1.892	-5.315	0.029	-6.361	-0.564	-7.47	-0.252	-13.804	0.899	-16.3	0.314	-17.095	-70	-0.629	-11.405	0.909	-5.539	-1.471	-9.05	0.352	-6.011	-0.327	-11.261	-0.949	-20.155	1.047	-17.643	-3.396	-14.335	1.359	-14.114	-0.671	-12.286	-70	-2.616	-15.749	-1.983	-15.763	-1.862	-15.38	-16.041	-38.726	-6.15	-9.93	-28.533	-21.796
-1.473	-6.564	0.348	-6.229	-1.491	-4.6	0.106	-5.926	-0.249	-6.498	-0.286	-12.266	0.949	-14.501	0.114	-14.919	-70	-0.675	-11.13	0.979	-5.104	-1.123	-8.348	0.543	-5.446	-0.543	-10.089	-1.247	-18.746	0.824	-15.903	-3.686	-12.962	1.485	-12.72	-0.979	-10.774	-70	-2.563	-15.772	-1.892	-15.956	-1.159	-15.019	-13.707	-39.973	-5.98	-10.005	-25.268	-22.372
-1.23	-5.776	0.383	-5.304	-0.956	-4.125	0.325	-5.553	-0.172	-5.775	-0.258	-10.891	0.922	-12.918	-0.16	-12.905	-70	-0.915	-10.999	0.8	-4.739	-0.862	-7.949	0.687	-5.1	-0.59	-9.155	-1.502	-17.579	0.577	-14.41	-3.777	-11.82	1.444	-11.606	-1.392	-9.62	-70	-2.466	-15.886	-1.732	-16.158	-0.648	-14.743	-11.393	-41.251	-5.579	-10.131	-21.968	-22.982
-0.612	-5.182	0.43	-4.566	-0.481	-3.82	0.577	-5.221	-0.403	-5.251	-0.23	-9.683	0.802	-11.503	-0.467	-11.105	-70	-1.29	-11.009	0.497	-4.412	-0.779	-7.801	0.75	-4.925	-0.521	-8.434	-1.613	-16.602	0.403	-13.178	-3.756	-10.935	1.237	-10.752	-1.83	-8.792	-70	-2.284	-16.063	-1.446	-16.272	-0.452	-14.486	-9.385	-42.484	-5.104	-10.272	-18.851	-23.603
0.172	-4.737	0.405	-4.026	-0.221	-3.62	0.797	-4.919	-0.811	-4.88	-0.273	-8.667	0.615	-10.204	-0.806	-9.575	-70	-1.692	-11.138	0.201	-4.103	-0.871	-7.805	0.686	-4.866	-0.413	-7.892	-1.53	-15.766	0.375	-12.215	-3.701	-10.337	0.901	-10.136	-2.126	-8.21	-70	-2.044	-16.274	-1.073	-16.257	-0.568	-14.202	-7.887	-43.648	-4.642	-10.416	-16.101	-24.228
0.829	-4.392	0.221	-3.682	-0.229	-3.477	0.996	-4.637	-1.189	-4.621	-0.391	-7.876	0.461	-8.978	-1.174	-8.348	-70	-2.005	-11.351	-0.024	-3.803	-1.051	-7.86	0.486	-4.867	-0.297	-7.489	-1.266	-15.051	0.467	-11.515	-3.611	-10.039	0.501	-9.735	-2.144	-7.774	-70	-1.799	-16.493	-0.739	-16.128	-0.85	-13.878	-6.922	-44.768	-4.2	-10.575	-13.805	-24.859
1.18	-4.106	-0.094	-3.503	-0.456	-3.361	1.218	-4.357	-1.404	-4.451	-0.52	-7.321	0.442	-7.803	-1.495	-7.418	-70	-2.168	-11.599	-0.149	-3.517	-1.226	-7.887	0.221	-4.877	-0.167	-7.183	-0.9	-14.455	0.528	-11.043	-3.436	-10.016	0.129	-9.52	-1.895	-7.394	-70	-1.588	-16.696	-0.564	-15.941	-1.099	-13.541	-6.313	-45.891	-3.748	-10.766	-11.922	-25.489
1.262	-3.852	-0.374	-3.435	-0.782	-3.258	1.465	-4.065	-1.454	-4.347	-0.598	-6.97	0.574	-6.689	-1.624	-6.74	-70	-2.213	-11.839	-0.14	-3.264	-1.365	-7.86	0.014	-4.856	-0.005	-6.934	-0.571	-13.989	0.382	-10.745	-3.13	-10.201	-0.129	-9.457	-1.51	-7.011	-70	-1.424	-16.855	-0.557	-15.768	-1.188	-13.254	-5.793	-47.051	-3.266	-11.005	-10.307	-26.106
1.228	-3.618	-0.424	-3.412	-1.074	-3.151	1.673	-3.757	-1.42	-4.286	-0.649	-6.748	0.761	-5.673	-1.469	-6.241	-70	-2.213	-12.05	0.008	-3.069	-1.49	-7.803	-0.025	-4.783	0.201	-6.698	-0.422	-13.659	-0.021	-10.57	-2.689	-10.499	-0.256	-9.517	-1.1	-6.608	-70	-1.294	-16.936	-0.613	-15.657	-1.088	-13.08	-5.191	-48.252	-2.767	-11.295	-8.813	-26.69
1.168	-3.405	-0.177	-3.378	-1.279	-3.025	1.754	-3.446	-1.39	-4.235	-0.754	-6.55	0.872	-4.804	-1.104	-5.849	-70	-2.174	-12.237	0.212	-2.948	-1.623	-7.769	0.15	-4.669	0.435	-6.434	-0.5	-13.461	-0.539	-10.472	-2.18	-10.811	-0.338	-9.661	-0.694	-6.207	-70	-1.162	-16.917	-0.614	-15.625	-0.827	-13.055	-4.521	-49.466	-2.309	-11.635	-7.423	-27.232
1.021	-3.224	0.259	-3.306	-1.442	-2.862	1.663	-3.163	-1.39	-4.164	-0.93	-6.285	0.831	-4.122	-0.735	-5.513	-70	-2.021	-12.424	0.345	-2.906	-1.737	-7.802	0.492	-4.551	0.613	-6.113	-0.712	-13.384	-0.939	-10.422	-1.746	-11.055	-0.488	-9.845	-0.298	-5.85	-70	-0.981	-16.803	-0.533	-15.648	-0.431	-13.164	-3.908	-50.644	-1.978	-12.024	-6.268	-27.73
0.688	-3.092	0.689	-3.201	-1.648	-2.66	1.438	-2.946	-1.349	-4.039	-1.042	-5.903	0.658	-3.638	-0.54	-5.208	-70	-1.72	-12.638	0.351	-2.931	-1.766	-7.911	0.89	-4.462	0.616	-5.732	-0.888	-13.417	-1.062	-10.396	-1.529	-11.171	-0.746	-10.01	0.023	-5.588	-70	-0.726	-16.634	-0.432	-15.685	0.048	-13.353	-3.459	-51.734	-1.844	-12.466	-5.492	-28.189
0.19	-3.021	0.958	-3.09	-1.933	-2.436	1.163	-2.822	-1.159	-3.837	-0.896	-5.414	0.434	-3.326	-0.54	-4.924	-70	-1.369	-12.892	0.321	-3.004	-1.656	-8.063	1.229	-4.418	0.402	-5.322	-0.902	-13.548	-0.9	-10.379	-1.546	-11.136	-1.058	-10.099	0.165	-5.459	-70	-0.431	-16.482	-0.371	-15.696	0.498	-13.562	-3.197	-52.709	-1.902	-12.966	-5.066	-28.606
-0.311	-3.011	1.02	-3.005	-2.259	-2.215	0.907	-2.787	-0.792	-3.538	-0.417	-4.872	0.263	-3.135	-0.606	-4.65	-70	-1.109	-13.176	0.415	-3.112	-1.4	-8.2	1.444	-4.399	0.064	-4.939	-0.737	-13.763	-0.548	-10.362	-1.659	-10.967	-1.35	-10.075	0.068	-5.473	-70	-0.173	-16.416	-0.331	-15.667	0.77	-13.763	-3.087	-53.579	-2.04	-13.521	-4.777	-28.972
-0.635	-3.048	0.92	-2.966	-2.552	-2.017	0.695	-2.803	-0.383	-3.137	0.268	-4.352	0.215	-3.001	-0.573	-4.367	-70	-0.966	-13.454	0.693	-3.246	-1.037	-8.266	1.511	-4.358	-0.224	-4.644	-0.453	-14.04	-0.13	-10.357	-1.668	-10.721	-1.577	-9.937	-0.233	-5.61	-70	-0.016	-16.482	-0.232	-15.611	0.774	-13.974	-3.076	-54.396	-2.088	-14.103	-4.384	-29.279
-0.717	-3.105	0.722	-2.979	-2.749	-1.84	0.532	-2.808	-0.149	-2.651	0.936	-3.911	0.28	-2.874	-0.388	-4.058	-70	-0.837	-13.679	1.029	-3.403	-0.622	-8.238	1.417	-4.251	-0.35	-4.472	-0.124	-14.355	0.252	-10.384	-1.466	-10.478	-1.712	-9.717	-0.641	-5.825	-70	0.041	-16.688	-0.04	-15.565	0.549	-14.247	-3.116	-55.238	-1.923	-14.661	-3.806	-29.529
-0.617	-3.153	0.448	-3.036	-2.817	-1.674	0.435	-2.744	-0.21	-2.131	1.419	-3.578	0.354	-2.73	-0.175	-3.719	-70	-0.626	-13.815	1.219	-3.575	-0.2	-8.124	1.147	-4.053	-0.338	-4.413	0.17	-14.684	0.553	-10.468	-1.095	-10.315	-1.723	-9.463	-1.059	-6.068	-70	0.033	-17.005	0.155	-15.559	0.233	-14.622	-3.144	-56.178	-1.566	-15.129	-3.156	-29.745
-0.425	-3.165	0.108	-3.122	-2.753	-1.515	0.43	-2.584	-0.495	-1.651	1.664	-3.348	0.313	-2.569	-0.147	-3.369	-70	-0.382	-13.856	1.173	-3.746	0.207	-7.957	0.739	-3.767	-0.319	-4.41	0.334	-14.999	0.776	-10.614	-0.694	-10.284	-1.592	-9.219	-1.432	-6.304	-70	-0.028	-17.39	0.202	-15.601	-0.035	-15.099	-3.045	-57.252	-1.158	-15.453	-2.632	-29.953
-0.182	-3.129	-0.249	-3.216	-2.543	-1.391	0.541	-2.346	-0.814	-1.288	1.695	-3.189	0.132	-2.405	-0.43	-3.035	-70	-0.274	-13.843	0.993	-3.893	0.608	-7.772	0.301	-3.426	-0.428	-4.39	0.307	-15.269	0.93	-10.81	-0.394	-10.39	-1.348	-9.01	-1.718	-6.523	-70	-0.137	-17.799	0.032	-15.664	-0.178	-15.635	-2.686	-58.441	-0.853	-15.61	-2.348	-30.171
0.126	-3.042	-0.542	-3.3	-2.161	-1.35	0.773	-2.076	-0.998	-1.086	1.56	-3.064	-0.074	-2.252	-0.968	-2.734	-70	-0.443	-13.841	0.849	-3.994	1.018	-7.595	-0.034	-3.076	-0.722	-4.292	0.141	-15.465	1.016	-11.022	-0.267	-10.597	-1.075	-8.832	-1.868	-6.737	-70	-0.267	-18.198	-0.259	-15.701	-0.188	-16.154	-2.039	-59.669	-0.722	-15.62	-2.252	-30.397
0.512	-2.909	-0.712	-3.357	-1.629	-1.443	1.087	-1.827	-1.012	-1.038	1.311	-2.942	-0.136	-2.114	-1.579	-2.469	-70	-0.873	-13.915	0.801	-4.033	1.411	-7.446	-0.208	-2.772	-1.152	-4.098	-0.02	-15.567	1.067	-11.216	-0.314	-10.838	-0.857	-8.664	-1.846	-6.971	-70	-0.387	-18.569	-0.477	-15.668	-0.094	-16.585	-1.257	-60.835	-0.754	-15.536	-2.199	-30.618
0.934	-2.731	-0.726	-3.377	-1.076	-1.693	1.37	-1.628	-0.946	-1.089	1.005	-2.806	0.039	-1.988	-2.063	-2.226	-70	-1.398	-14.093	0.742	-3.998	1.706	-7.333	-0.256	-2.561	-1.599	-3.829	-0.065	-15.578	1.171	-11.368	-0.475	-11.042	-0.698	-8.478	-1.664	-7.246	-70	-0.499	-18.908	-0.481	-15.545	0.045	-16.879	-0.615	-61.842	-0.899	-15.429	-2.085	-30.816
1.285	-2.513	-0.56	-3.359	-0.666	-2.08	1.465	-1.477	-0.921	-1.168	0.708	-2.655	0.433	-1.868	-2.281	-1.995	-70	-1.818	-14.353	0.519	-3.889	1.817	-7.262	-0.251	-2.469	-1.947	-3.536	0.019	-15.53	1.39	-11.474	-0.634	-11.152	-0.515	-8.251	-1.388	-7.569	-70	-0.605	-19.214	-0.262	-15.357	0.144	-17.025	-0.348	-62.638	-1.072	-15.369	-1.919	-30.985
1.465	-2.262	-0.254	-3.307	-0.472	-2.544	1.285	-1.352	-0.977	-1.225	0.461	-2.496	0.959	-1.757	-2.182	-1.769	-70	-1.998	-14.636	0.099	-3.718	1.719	-7.23	-0.236	-2.491	-2.148	-3.268	0.204	-15.462	1.685	-11.537	-0.686	-11.135	-0.237	-7.977	-1.104	-7.928	-70	-0.659	-19.489	0.063	-15.164	0.118	-17.044	-0.509	-63.23	-1.15	-15.402	-1.783	-31.133
1.457	-1.998	0.048	-3.227	-0.421	-3.013	0.896	-1.229	-1.03	-1.249	0.267	-2.338	1.501	-1.662	-1.81	-1.553	-70	-1.905	-14.873	-0.395	-3.51	1.46	-7.217	-0.215	-2.593	-2.251	-3.058	0.486	-15.409	1.924	-11.563	-0.621	-10.991	0.085	-7.664	-0.895	-8.294	-70	-0.607	-19.736	0.332	-15.041	-0.064	-16.978	-0.937	-63.682	-1.037	-15.536	-1.736	-31.273
1.337	-1.747	0.176	-3.129	-0.393	-3.423	0.487	-1.1	-0.951	-1.258	0.13	-2.185	1.929	-1.589	-1.297	-1.354	-70	-1.597	-15.018	-0.788	-3.296	1.113	-7.192	-0.183	-2.728	-2.334	-2.909	0.85	-15.384	1.962	-11.55	-0.519	-10.749	0.31	-7.335	-0.809	-8.632	-70	-0.472	-19.963	0.435	-15.05	-0.35	-16.869	-1.341	-64.086	-0.754	-15.743	-1.74	-31.412
1.187	-1.537	0.084	-3.025	-0.323	-3.728	0.23	-0.979	-0.676	-1.28	0.084	-2.038	2.129	-1.537	-0.803	-1.179	-70	-1.186	-15.068	-0.981	-3.104	0.735	-7.122	-0.145	-2.857	-2.422	-2.81	1.212	-15.378	1.74	-11.49	-0.466	-10.454	0.338	-7.014	-0.849	-8.918	-70	-0.348	-20.176	0.371	-15.215	-0.625	-16.744	-1.462	-64.532	-0.475	-15.969	-1.678	-31.553
1.014	-1.385	-0.119	-2.942	-0.233	-3.896	0.184	-0.889	-0.253	-1.323	0.149	-1.898	2.057	-1.494	-0.449	-1.033	-70	-0.78	-15.053	-0.976	-2.946	0.355	-6.994	-0.115	-2.967	-2.446	-2.741	1.45	-15.381	1.34	-11.377	-0.485	-10.155	0.202	-6.735	-0.969	-9.153	-70	-0.319	-20.37	0.234	-15.512	-0.785	-16.62	-1.2	-65.074	-0.411	-16.156	-1.45	-31.695
0.764	-1.295	-0.301	-2.913	-0.174	-3.902	0.308	-0.84	0.198	-1.368	0.272	-1.769	1.746	-1.445	-0.257	-0.925	-70	-0.421	-15.015	-0.827	-2.818	0.006	-6.825	-0.108	-3.072	-2.299	-2.69	1.477	-15.394	0.958	-11.218	-0.567	-9.89	0.026	-6.531	-1.105	-9.366	-70	-0.394	-20.526	0.129	-15.872	-0.813	-16.516	-0.642	-65.724	-0.633	-16.267	-1.058	-31.851
0.429	-1.257	-0.433	-2.966	-0.144	-3.726	0.529	-0.83	0.559	-1.379	0.353	-1.659	1.277	-1.374	-0.163	-0.858	-70	-0.086	-14.986	-0.597	-2.714	-0.281	-6.652	-0.126	-3.206	-1.923	-2.659	1.269	-15.431	0.76	-11.032	-0.698	-9.681	-0.068	-6.429	-1.214	-9.593	-70	-0.549	-20.621	0.081	-16.209	-0.8	-16.472	-0.016	-66.457	-1.005	-16.292	-0.593	-32.06
0.09	-1.255	-0.554	-3.094	-0.068	-3.364	0.781	-0.855	0.741	-1.319	0.346	-1.574	0.758	-1.27	-0.076	-0.833	-70	0.251	-14.972	-0.341	-2.638	-0.491	-6.516	-0.141	-3.404	-1.377	-2.667	0.861	-15.512	0.772	-10.847	-0.873	-9.541	-0.028	-6.443	-1.272	-9.853	-70	-0.759	-20.642	0.027	-16.451	-0.888	-16.537	0.411	-67.224	-1.286	-16.259	-0.139	-32.379
-0.153	-1.274	-0.659	-3.244	0.125	-2.847	0.999	-0.93	0.69	-1.176	0.316	-1.516	0.294	-1.124	0.051	-0.837	-70	0.55	-14.964	-0.093	-2.598	-0.624	-6.438	-0.126	-3.68	-0.822	-2.74	0.343	-15.648	0.904	-10.684	-1.076	-9.474	0.127	-6.565	-1.253	-10.132	-70	-0.969	-20.606	-0.115	-16.557	-1.152	-16.758	0.457	-67.974	-1.316	-16.214	0.282	-32.853
-0.266	-1.299	-0.677	-3.324	0.405	-2.242	1.134	-1.086	0.407	-0.97	0.377	-1.482	-0.046	-0.932	0.17	-0.848	-70	0.724	-14.951	0.126	-2.593	-0.647	-6.422	-0.102	-4.02	-0.441	-2.893	-0.147	-15.836	1.05	-10.558	-1.268	-9.479	0.332	-6.766	-1.121	-10.379	-70	-1.063	-20.562	-0.358	-16.527	-1.52	-17.146	0.144	-68.664	-1.101	-16.207	0.691	-33.487
-0.277	-1.316	-0.559	-3.249	0.648	-1.644	1.185	-1.361	-0.014	-0.756	0.587	-1.463	-0.231	-0.686	0.158	-0.852	-70	0.718	-14.925	0.27	-2.6	-0.5	-6.465	-0.124	-4.381	-0.336	-3.123	-0.464	-16.058	1.138	-10.467	-1.39	-9.543	0.528	-7.005	-0.861	-10.529	-70	-0.941	-20.575	-0.636	-16.39	-1.82	-17.66	-0.317	-69.269	-0.772	-16.267	1.067	-34.226
-0.215	-1.315	-0.372	-2.979	0.729	-1.139	1.183	-1.763	-0.413	-0.603	0.916	-1.453	-0.242	-0.387	-0.075	-0.846	-70	0.581	-14.885	0.264	-2.575	-0.182	-6.561	-0.211	-4.706	-0.485	-3.407	-0.538	-16.288	1.105	-10.408	-1.4	-9.635	0.693	-7.247	-0.492	-10.527	-70	-0.641	-20.692	-0.867	-16.183	-1.926	-18.215	-0.642	-69.787	-0.488	-16.387	1.299	-34.967
-0.085	-1.294	-0.248	-2.539	0.61	-0.778	1.127	-2.258	-0.641	-0.567	1.28	-1.442	-0.062	-0.049	-0.475	-0.849	-70	0.476	-14.828	0.073	-2.481	0.178	-6.707	-0.304	-4.938	-0.792	-3.708	-0.419	-16.496	0.914	-10.376	-1.301	-9.721	0.84	-7.476	-0.07	-10.354	-70	-0.345	-20.916	-1.01	-15.936	-1.875	-18.709	-0.641	-70.238	-0.373	-16.531	1.229	-35.604
0.082	-1.254	-0.264	-2.002	0.333	-0.559	0.969	-2.777	-0.643	-0.663	1.614	-1.416	0.27	0.298	-0.841	-0.892	-70	0.579	-14.76	-0.237	-2.312	0.414	-6.887	-0.327	-5.044	-1.172	-3.993	-0.217	-16.659	0.604	-10.375	-1.129	-9.769	0.973	-7.689	0.313	-10.039	-70	-0.276	-21.196	-1.046	-15.674	-1.839	-19.06	-0.306	-70.649	-0.464	-16.652	0.781	-36.064
0.202	-1.199	-0.386	-1.455	-0.022	-0.433	0.697	-3.24	-0.47	-0.863	1.899	-1.353	0.638	0.603	-0.981	-1.001	-70	0.961	-14.695	-0.535	-2.104	0.479	-7.074	-0.28	-5.015	-1.557	-4.241	0.02	-16.769	0.292	-10.414	-0.937	-9.768	1.068	-7.893	0.538	-9.646	-70	-0.585	-21.447	-0.935	-15.42	-1.959	-19.233	0.185	-71.047	-0.675	-16.713	0.086	-36.33
0.203	-1.134	-0.531	-0.968	-0.371	-0.334	0.411	-3.59	-0.244	-1.103	2.135	-1.226	0.893	0.816	-0.873	-1.184	-70	1.508	-14.661	-0.72	-1.916	0.472	-7.238	-0.243	-4.872	-1.859	-4.446	0.33	-16.842	0.091	-10.496	-0.779	-9.729	1.064	-8.088	0.518	-9.257	-70	-1.312	-21.584	-0.634	-15.199	-2.237	-19.246	0.565	-71.439	-0.851	-16.701	-0.563	-36.434
0.106	-1.053	-0.653	-0.587	-0.643	-0.215	0.281	-3.808	-0.099	-1.317	2.279	-1.016	0.938	0.897	-0.666	-1.421	-70	1.98	-14.687	-0.772	-1.804	0.507	-7.365	-0.301	-4.653	-1.984	-4.614	0.746	-16.911	0.03	-10.61	-0.666	-9.687	0.909	-8.265	0.297	-8.947	-70	-2.401	-21.559	-0.17	-15.046	-2.576	-19.143	0.637	-71.809	-0.887	-16.622	-0.916	-36.425
-0.001	-0.947	-0.751	-0.339	-0.784	-0.064	0.401	-3.908	-0.131	-1.451	2.253	-0.726	0.757	0.836	-0.523	-1.666	-70	2.174	-14.789	-0.73	-1.799	0.569	-7.469	-0.47	-4.403	-1.909	-4.753	1.218	-17.022	0.062	-10.731	-0.551	-9.685	0.605	-8.412	0.049	-8.768	-70	-3.707	-21.381	0.326	-14.993	-2.891	-18.967	0.41	-72.123	-0.81	-16.497	-0.933	-36.353
-0.091	-0.806	-0.814	-0.239	-0.766	0.097	0.691	-3.914	-0.381	-1.482	2	-0.387	0.392	0.653	-0.466	-1.865	-70	2.068	-14.963	-0.677	-1.898	0.533	-7.588	-0.708	-4.165	-1.718	-4.873	1.628	-17.207	0.131	-10.824	-0.403	-9.763	0.224	-8.516	-0.053	-8.74	-70	-5.017	-21.107	0.694	-15.072	-3.149	-18.732	0.09	-72.344	-0.74	-16.352	-0.756	-36.257
-0.24	-0.637	-0.802	-0.29	-0.604	0.227	0.931	-3.849	-0.829	-1.41	1.543	-0.054	-0.09	0.386	-0.368	-1.97	-70	1.811	-15.193	-0.713	-2.078	0.312	-7.759	-0.957	-3.981	-1.54	-4.974	1.87	-17.472	0.212	-10.862	-0.297	-9.938	-0.142	-8.564	0.023	-8.853	-70	-6.077	-20.823	0.872	-15.303	-3.33	-18.435	-0.072	-72.447	-0.765	-16.218	-0.544	-36.168
-0.509	-0.472	-0.694	-0.475	-0.358	0.293	0.88	-3.727	-1.394	-1.246	0.971	0.207	-0.583	0.082	-0.117	-1.957	-70	1.573	-15.455	-0.874	-2.307	-0.022	-7.996	-1.169	-3.886	-1.454	-5.05	1.883	-17.792	0.315	-10.827	-0.373	-10.204	-0.423	-8.542	0.173	-9.065	-70	-6.663	-20.608	0.931	-15.69	-3.383	-18.074	0.045	-72.433	-0.881	-16.127	-0.362	-36.114
-0.811	-0.36	-0.524	-0.752	-0.084	0.281	0.424	-3.561	-1.944	-1.001	0.361	0.34	-0.961	-0.226	0.257	-1.835	-70	1.401	-15.725	-1.078	-2.56	-0.289	-8.276	-1.301	-3.905	-1.447	-5.085	1.646	-18.12	0.475	-10.715	-0.67	-10.528	-0.575	-8.442	0.287	-9.323	-70	-6.667	-20.518	0.999	-16.215	-3.259	-17.683	0.381	-72.338	-1.029	-16.115	-0.215	-36.117
-0.947	-0.345	-0.36	-1.066	0.198	0.205	-0.364	-3.366	-2.347	-0.685	-0.266	0.324	-1.142	-0.519	0.583	-1.638	-70	1.22	-15.986	-1.17	-2.815	-0.36	-8.543	-1.339	-4.035	-1.432	-5.062	1.184	-18.398	0.728	-10.535	-1.052	-10.865	-0.582	-8.27	0.325	-9.573	-70	-6.155	-20.567	1.137	-16.828	-2.955	-17.327	0.76	-72.218	-1.166	-16.204	-0.119	-36.187
-0.776	-0.438	-0.251	-1.369	0.492	0.096	-1.251	-3.16	-2.528	-0.315	-0.922	0.175	-1.145	-0.787	0.684	-1.415	-70	0.956	-16.227	-1.069	-3.053	-0.251	-8.732	-1.296	-4.248	-1.315	-4.971	0.588	-18.577	1.055	-10.315	-1.303	-11.173	-0.501	-8.05	0.28	-9.777	-70	-5.316	-20.733	1.308	-17.46	-2.528	-17.085	0.997	-72.136	-1.303	-16.405	-0.106	-36.315
-0.334	-0.609	-0.223	-1.632	0.784	-0.015	-1.977	-2.956	-2.465	0.074	-1.562	-0.049	-1.055	-1.019	0.503	-1.211	-70	0.632	-16.454	-0.848	-3.248	-0.075	-8.784	-1.176	-4.497	-1.063	-4.815	0.034	-18.624	1.361	-10.103	-1.274	-11.422	-0.462	-7.824	0.111	-9.913	-70	-4.359	-20.965	1.452	-18.032	-2.05	-17.011	0.97	-72.126	-1.487	-16.706	-0.157	-36.477
0.202	-0.795	-0.3	-1.836	1.014	-0.106	-2.388	-2.758	-2.177	0.433	-2.044	-0.28	-0.94	-1.193	0.136	-1.049	-70	0.35	-16.684	-0.675	-3.379	0.078	-8.674	-0.931	-4.74	-0.746	-4.608	-0.281	-18.527	1.517	-9.966	-0.958	-11.599	-0.556	-7.633	-0.236	-9.982	-70	-3.423	-21.198	1.567	-18.481	-1.557	-17.116	0.679	-72.184	-1.752	-17.077	-0.192	-36.643
0.646	-0.936	-0.483	-1.964	1.103	-0.172	-2.481	-2.565	-1.718	0.708	-2.183	-0.456	-0.805	-1.284	-0.227	-0.929	-70	0.2	-16.933	-0.653	-3.435	0.202	-8.41	-0.503	-4.957	-0.506	-4.37	-0.256	-18.296	1.444	-9.961	-0.471	-11.697	-0.735	-7.5	-0.726	-9.997	-70	-2.561	-21.369	1.682	-18.772	-1.042	-17.358	0.265	-72.278	-2.068	-17.478	-0.141	-36.78
0.89	-0.997	-0.69	-1.989	0.999	-0.215	-2.352	-2.376	-1.174	0.857	-1.873	-0.541	-0.614	-1.269	-0.423	-0.839	-70	0.19	-17.203	-0.727	-3.427	0.344	-8.043	0.074	-5.15	-0.468	-4.113	0.053	-17.958	1.154	-10.112	0.018	-11.707	-0.856	-7.423	-1.181	-9.979	-70	-1.785	-21.441	1.79	-18.905	-0.499	-17.672	-0.056	-72.379	-2.341	-17.874	-0.056	-36.866
0.91	-0.98	-0.767	-1.891	0.723	-0.232	-2.099	-2.195	-0.607	0.866	-1.2	-0.533	-0.336	-1.144	-0.408	-0.766	-70	0.275	-17.469	-0.74	-3.389	0.532	-7.645	0.626	-5.334	-0.65	-3.844	0.483	-17.553	0.744	-10.396	0.366	-11.616	-0.829	-7.388	-1.352	-9.943	-70	-1.133	-21.417	1.828	-18.904	0.032	-17.982	-0.149	-72.482	-2.467	-18.234	-0.09	-36.892
0.732	-0.914	-0.607	-1.683	0.374	-0.212	-1.776	-2.034	-0.043	0.746	-0.442	-0.452	0.024	-0.925	-0.26	-0.707	-70	0.403	-17.688	-0.601	-3.365	0.734	-7.293	0.925	-5.512	-0.939	-3.566	0.87	-17.126	0.346	-10.747	0.521	-11.419	-0.687	-7.376	-1.101	-9.896	-70	-0.69	-21.349	1.733	-18.809	0.449	-18.225	-0.077	-72.613	-2.39	-18.534	-0.363	-36.87
0.415	-0.833	-0.267	-1.416	0.056	-0.133	-1.41	-1.908	0.452	0.531	0.083	-0.332	0.398	-0.643	-0.1	-0.663	-70	0.536	-17.82	-0.39	-3.387	0.88	-7.048	0.844	-5.665	-1.182	-3.284	1.126	-16.719	0.063	-11.09	0.529	-11.131	-0.517	-7.375	-0.514	-9.842	-70	-0.536	-21.31	1.495	-18.667	0.65	-18.361	-0.037	-72.799	-2.144	-18.754	-0.845	-36.826
0.046	-0.76	0.056	-1.16	-0.194	0.021	-1.04	-1.821	0.721	0.272	0.233	-0.203	0.686	-0.343	-0.004	-0.629	-70	0.648	-17.852	-0.297	-3.461	0.908	-6.937	0.444	-5.759	-1.303	-3.015	1.248	-16.372	-0.049	-11.365	0.476	-10.787	-0.375	-7.379	0.144	-9.789	-70	-0.65	-21.371	1.178	-18.523	0.608	-18.371	-0.178	-73.044	-1.831	-18.88	-1.377	-36.79
-0.294	-0.703	0.192	-0.964	-0.385	0.243	-0.736	-1.771	0.626	0.032	0.12	-0.085	0.837	-0.072	0.021	-0.587	-70	0.719	-17.801	-0.45	-3.564	0.797	-6.948	-0.056	-5.755	-1.335	-2.787	1.287	-16.113	0.035	-11.546	0.419	-10.441	-0.282	-7.383	0.597	-9.755	-70	-0.878	-21.567	0.902	-18.418	0.408	-18.26	-0.485	-73.316	-1.558	-18.903	-1.79	-36.777
-0.56	-0.659	0.135	-0.826	-0.518	0.494	-0.559	-1.741	0.21	-0.131	-0.022	0.014	0.908	0.125	-0.009	-0.517	-70	0.755	-17.715	-0.811	-3.647	0.587	-7.036	-0.417	-5.636	-1.336	-2.626	1.298	-15.959	0.298	-11.632	0.387	-10.147	-0.262	-7.379	0.708	-9.762	-70	-1.027	-21.882	0.77	-18.376	0.205	-18.049	-0.848	-73.563	-1.371	-18.83	-1.998	-36.775
-0.738	-0.618	0.022	-0.706	-0.581	0.715	-0.521	-1.715	-0.304	-0.172	-0.038	0.098	0.997	0.221	-0.089	-0.412	-70	0.787	-17.646	-1.227	-3.662	0.381	-7.143	-0.499	-5.416	-1.331	-2.545	1.312	-15.914	0.648	-11.636	0.409	-9.941	-0.359	-7.354	0.503	-9.823	-70	-1.008	-22.261	0.788	-18.399	0.106	-17.773	-1.192	-73.744	-1.248	-18.675	-2.009	-36.755
-0.815	-0.573	0.007	-0.555	-0.599	0.848	-0.563	-1.682	-0.68	-0.084	0.067	0.17	1.095	0.212	-0.216	-0.286	-70	0.871	-17.636	-1.555	-3.574	0.3	-7.221	-0.309	-5.143	-1.319	-2.535	1.325	-15.97	0.922	-11.568	0.498	-9.836	-0.601	-7.29	0.114	-9.928	-70	-0.895	-22.63	0.842	-18.469	0.094	-17.48	-1.513	-73.863	-1.146	-18.464	-1.871	-36.69
-0.782	-0.524	0.124	-0.343	-0.632	0.86	-0.598	-1.641	-0.826	0.099	0.204	0.228	1.049	0.129	-0.354	-0.164	-70	1.042	-17.703	-1.754	-3.382	0.391	-7.252	0.031	-4.88	-1.293	-2.569	1.318	-16.107	1.006	-11.439	0.603	-9.819	-0.962	-7.172	-0.298	-10.041	-70	-0.848	-22.931	0.792	-18.548	0.07	-17.222	-1.795	-73.971	-1.035	-18.227	-1.619	-36.582
-0.66	-0.478	0.283	-0.077	-0.698	0.764	-0.575	-1.608	-0.804	0.316	0.303	0.272	0.714	0.022	-0.448	-0.072	-70	1.251	-17.84	-1.865	-3.114	0.58	-7.253	0.366	-4.688	-1.228	-2.614	1.285	-16.303	0.935	-11.257	0.619	-9.854	-1.361	-7	-0.62	-10.108	-70	-0.957	-23.139	0.603	-18.589	-0.013	-17.046	-1.975	-74.139	-0.893	-17.993	-1.281	-36.463
-0.51	-0.447	0.373	0.212	-0.735	0.604	-0.498	-1.608	-0.728	0.504	0.364	0.308	0.132	-0.061	-0.465	-0.021	-70	1.358	-18.018	-1.925	-2.815	0.716	-7.268	0.562	-4.611	-1.088	-2.644	1.258	-16.543	0.827	-11.033	0.465	-9.899	-1.695	-6.787	-0.823	-10.08	-70	-1.175	-23.271	0.404	-18.557	-0.09	-16.985	-1.993	-74.416	-0.705	-17.79	-0.931	-36.379
-0.41	-0.441	0.366	0.482	-0.668	0.435	-0.391	-1.667	-0.661	0.611	0.429	0.35	-0.463	-0.091	-0.411	-0.012	-70	1.237	-18.188	-1.891	-2.527	0.7	-7.343	0.551	-4.665	-0.885	-2.649	1.304	-16.819	0.716	-10.78	0.147	-9.914	-1.86	-6.554	-0.931	-9.934	-70	-1.385	-23.365	0.392	-18.444	-0.052	-17.049	-1.86	-74.807	-0.48	-17.639	-0.712	-36.363
-0.41	-0.467	0.337	0.682	-0.495	0.294	-0.264	-1.799	-0.568	0.612	0.525	0.416	-0.821	-0.076	-0.305	-0.039	-70	0.91	-18.3	-1.675	-2.27	0.561	-7.503	0.352	-4.843	-0.697	-2.632	1.463	-17.133	0.5	-10.513	-0.24	-9.881	-1.762	-6.318	-0.949	-9.694	-70	-1.515	-23.448	0.645	-18.277	0.155	-17.223	-1.644	-75.271	-0.253	-17.546	-0.744	-36.426
-0.497	-0.515	0.378	0.76	-0.289	0.187	-0.13	-1.992	-0.387	0.496	0.636	0.51	-0.838	-0.053	-0.144	-0.095	-70	0.539	-18.303	-1.24	-2.043	0.418	-7.736	0.072	-5.113	-0.615	-2.6	1.674	-17.483	0.075	-10.247	-0.546	-9.802	-1.365	-6.084	-0.863	-9.421	-70	-1.556	-23.52	1.047	-18.113	0.491	-17.468	-1.413	-75.76	-0.08	-17.507	-1.011	-36.551
-0.598	-0.562	0.526	0.67	-0.136	0.094	-0.021	-2.202	-0.121	0.272	0.694	0.614	-0.567	-0.074	0.09	-0.162	-70	0.286	-18.17	-0.685	-1.828	0.37	-7.995	-0.146	-5.425	-0.655	-2.568	1.753	-17.855	-0.508	-10.003	-0.626	-9.698	-0.75	-5.849	-0.686	-9.199	-70	-1.473	-23.555	1.38	-18.016	0.832	-17.736	-1.205	-76.252	-0.007	-17.505	-1.363	-36.71
-0.628	-0.562	0.733	0.396	-0.099	-0.008	0.031	-2.366	0.141	-0.032	0.597	0.693	-0.129	-0.172	0.388	-0.222	-70	0.183	-17.898	-0.207	-1.607	0.423	-8.222	-0.222	-5.722	-0.752	-2.559	1.487	-18.221	-1.038	-9.812	-0.425	-9.597	-0.109	-5.623	-0.468	-9.106	-70	-1.18	-23.533	1.488	-18.024	1.007	-17.978	-1.033	-76.755	-0.064	-17.513	-1.633	-36.863
-0.579	-0.467	0.922	-0.029	-0.178	-0.135	0.045	-2.422	0.314	-0.356	0.247	0.716	0.326	-0.346	0.692	-0.255	-70	0.16	-17.512	0.001	-1.378	0.493	-8.376	-0.203	-5.966	-0.822	-2.604	0.819	-18.537	-1.276	-9.704	-0.036	-9.522	0.357	-5.427	-0.249	-9.19	-70	-0.637	-23.468	1.362	-18.133	0.872	-18.158	-0.878	-77.284	-0.253	-17.511	-1.744	-36.972
-0.565	-0.241	1.033	-0.524	-0.298	-0.282	0.105	-2.34	0.4	-0.629	-0.395	0.671	0.636	-0.556	0.913	-0.25	-70	0.165	-17.057	-0.14	-1.17	0.463	-8.452	-0.213	-6.151	-0.832	-2.733	-0.066	-18.766	-1.108	-9.701	0.339	-9.5	0.563	-5.296	-0.031	-9.448	-70	0.017	-23.403	1.103	-18.3	0.421	-18.263	-0.681	-77.827	-0.542	-17.491	-1.734	-37.005
-0.75	0.122	1.052	-0.98	-0.337	-0.432	0.314	-2.135	0.474	-0.789	-1.255	0.572	0.685	-0.746	0.992	-0.213	-70	0.222	-16.596	-0.56	-1.024	0.251	-8.478	-0.318	-6.303	-0.818	-2.961	-0.809	-18.883	-0.613	-9.805	0.51	-9.549	0.558	-5.253	0.181	-9.832	-70	0.504	-23.396	0.824	-18.458	-0.168	-18.308	-0.383	-78.341	-0.875	-17.458	-1.687	-36.955
-1.2	0.585	1.008	-1.304	-0.227	-0.561	0.703	-1.865	0.595	-0.813	-2.141	0.449	0.512	-0.869	0.943	-0.161	-70	0.386	-16.194	-1.087	-0.978	-0.145	-8.483	-0.446	-6.456	-0.864	-3.271	-1.092	-18.894	-0.033	-9.988	0.423	-9.68	0.447	-5.293	0.352	-10.255	-70	0.601	-23.474	0.585	-18.552	-0.66	-18.32	-0.015	-78.767	-1.201	-17.429	-1.64	-36.845
-1.795	1.076	0.961	-1.457	-0.007	-0.641	1.18	-1.616	0.73	-0.732	-2.807	0.336	0.334	-0.907	0.84	-0.108	-70	0.635	-15.911	-1.541	-1.042	-0.612	-8.481	-0.445	-6.619	-1.047	-3.627	-0.812	-18.829	0.38	-10.197	0.169	-9.879	0.296	-5.387	0.428	-10.626	-70	0.326	-23.629	0.415	-18.561	-0.934	-18.326	0.28	-79.066	-1.498	-17.413	-1.532	-36.731
-2.301	1.499	0.951	-1.466	0.209	-0.651	1.565	-1.466	0.78	-0.611	-3.061	0.261	0.394	-0.87	0.762	-0.066	-70	0.849	-15.788	-1.808	-1.19	-0.953	-8.456	-0.221	-6.768	-1.366	-3.98	-0.118	-18.737	0.514	-10.36	-0.114	-10.104	0.119	-5.496	0.379	-10.874	-70	-0.065	-23.817	0.34	-18.503	-1.031	-18.328	0.335	-79.237	-1.751	-17.405	-1.262	-36.679
-2.527	1.76	0.927	-1.402	0.313	-0.576	1.712	-1.462	0.661	-0.519	-2.864	0.237	0.745	-0.778	0.732	-0.037	-70	0.883	-15.83	-1.875	-1.37	-0.999	-8.38	0.165	-6.853	-1.71	-4.292	0.699	-18.663	0.447	-10.414	-0.332	-10.294	-0.081	-5.585	0.207	-10.971	-70	-0.265	-23.988	0.354	-18.42	-1.031	-18.306	0.099	-79.313	-1.925	-17.386	-0.811	-36.743
-2.409	1.793	0.797	-1.348	0.285	-0.42	1.631	-1.601	0.375	-0.505	-2.359	0.265	1.194	-0.65	0.71	-0.019	-70	0.688	-16.006	-1.798	-1.535	-0.744	-8.239	0.53	-6.836	-1.911	-4.541	1.338	-18.636	0.366	-10.329	-0.451	-10.39	-0.278	-5.637	-0.054	-10.93	-70	-0.133	-24.105	0.37	-18.36	-0.949	-18.224	-0.31	-79.327	-1.962	-17.339	-0.329	-36.936
-1.991	1.588	0.557	-1.36	0.208	-0.204	1.484	-1.826	0.009	-0.584	-1.793	0.338	1.462	-0.493	0.627	-0.004	-70	0.351	-16.254	-1.651	-1.648	-0.367	-8.051	0.684	-6.721	-1.865	-4.72	1.595	-18.665	0.43	-10.124	-0.449	-10.362	-0.439	-5.653	-0.343	-10.8	-70	0.224	-24.153	0.262	-18.347	-0.775	-18.058	-0.692	-79.294	-1.817	-17.259	-0.088	-37.229
-1.357	1.199	0.35	-1.454	0.214	0.036	1.449	-2.051	-0.303	-0.74	-1.366	0.448	1.405	-0.31	0.443	0.019	-70	0.022	-16.51	-1.485	-1.697	-0.099	-7.86	0.561	-6.555	-1.608	-4.827	1.414	-18.742	0.667	-9.868	-0.313	-10.217	-0.562	-5.642	-0.574	-10.635	-70	0.575	-24.135	0.002	-18.379	-0.568	-17.803	-0.889	-79.209	-1.498	-17.161	-0.289	-37.561
-0.614	0.728	0.346	-1.6	0.378	0.261	1.57	-2.192	-0.465	-0.937	-1.131	0.587	1.094	-0.104	0.196	0.062	-70	-0.177	-16.725	-1.327	-1.684	-0.07	-7.714	0.264	-6.402	-1.309	-4.864	0.898	-18.849	0.981	-9.65	-0.075	-9.992	-0.696	-5.617	-0.691	-10.482	-70	0.769	-24.062	-0.267	-18.437	-0.435	-17.472	-0.84	-79.063	-1.105	-17.071	-0.875	-37.858
0.074	0.294	0.565	-1.746	0.651	0.444	1.729	-2.203	-0.49	-1.128	-0.999	0.745	0.707	0.113	-0.008	0.126	-70	-0.191	-16.877	-1.172	-1.623	-0.255	-7.641	0.004	-6.307	-1.178	-4.848	0.244	-18.971	1.232	-9.55	0.168	-9.734	-0.906	-5.579	-0.706	-10.364	-70	0.818	-23.945	-0.354	-18.498	-0.433	-17.094	-0.572	-78.868	-0.807	-17.012	-1.55	-38.056
0.515	-0.014	0.859	-1.835	0.879	0.575	1.762	-2.092	-0.492	-1.269	-0.843	0.91	0.383	0.321	-0.065	0.196	-70	-0.006	-16.973	-0.997	-1.538	-0.515	-7.64	-0.03	-6.279	-1.349	-4.811	-0.36	-19.104	1.338	-9.603	0.28	-9.487	-1.185	-5.515	-0.688	-10.287	-70	0.832	-23.792	-0.212	-18.546	-0.518	-16.707	-0.207	-78.662	-0.735	-16.99	-2.002	-38.124
0.597	-0.156	1.054	-1.837	0.91	0.665	1.614	-1.911	-0.589	-1.329	-0.592	1.061	0.162	0.495	0.04	0.244	-70	0.376	-17.036	-0.779	-1.469	-0.685	-7.69	0.2	-6.293	-1.787	-4.798	-0.797	-19.252	1.291	-9.8	0.162	-9.285	-1.401	-5.395	-0.703	-10.25	-70	0.901	-23.604	0.022	-18.574	-0.603	-16.364	0.082	-78.496	-0.883	-16.996	-2.127	-38.065
0.4	-0.148	1.077	-1.759	0.714	0.733	1.363	-1.728	-0.782	-1.297	-0.264	1.176	0.031	0.615	0.219	0.24	-70	0.92	-17.095	-0.526	-1.459	-0.658	-7.774	0.551	-6.32	-2.292	-4.846	-1.004	-19.42	1.095	-10.096	-0.171	-9.156	-1.375	-5.19	-0.777	-10.262	-70	1.025	-23.395	0.195	-18.575	-0.638	-16.125	0.184	-78.416	-1.099	-17.012	-2.038	-37.911
0.149	-0.042	0.956	-1.645	0.404	0.802	1.111	-1.598	-0.935	-1.185	0.058	1.245	-0.008	0.67	0.352	0.17	-70	1.54	-17.177	-0.307	-1.547	-0.433	-7.888	0.807	-6.346	-2.63	-4.961	-0.947	-19.601	0.729	-10.433	-0.581	-9.118	-1.043	-4.894	-0.895	-10.342	-70	1.115	-23.189	0.29	-18.543	-0.635	-16.049	0.146	-78.435	-1.209	-17.025	-1.909	-37.704
0.049	0.096	0.738	-1.558	0.137	0.889	0.884	-1.543	-0.879	-1.018	0.259	1.266	0.06	0.658	0.388	0.043	-70	2.091	-17.292	-0.237	-1.757	-0.091	-8.031	0.839	-6.374	-2.683	-5.109	-0.657	-19.773	0.219	-10.754	-0.89	-9.175	-0.542	-4.543	-1.026	-10.511	-70	1.079	-23.023	0.402	-18.468	-0.631	-16.172	0.108	-78.534	-1.139	-17.038	-1.831	-37.494
	0.212		-1.555		0.993		-1.553		-0.824		1.25		0.579		-0.118	-70		-17.429		-2.085		-8.19		-6.413		-5.233		-19.912		-11.016		-9.311		-4.203		-10.771	-70		-22.93		-18.339		-16.484		-78.667		-17.068		-37.322
	0.274		-1.657		1.094		-1.599		-0.633		1.21		0.442		-0.28	-70		-17.558		-2.493		-8.332		-6.461		-5.287		-20.004		-11.197		-9.498		-3.952		-11.094	-70		-22.919		-18.157		-16.925		-78.774		-17.133		-37.229
	0.282		-1.842		1.157		-1.648		-0.464		1.154		0.262		-0.419	-70		-17.642		-2.923		-8.409		-6.505		-5.257		-20.053		-11.297		-9.702		-3.844		-11.433	-70		-22.97		-17.934		-17.392		-78.806		-17.242		-37.24
	0.261		-2.052		1.148		-1.679		-0.325		1.087		0.062		-0.518	-70		-17.646		-3.31		-8.395		-6.539		-5.164		-20.068		-11.339		-9.902		-3.89		-11.736	-70		-23.042		-17.698		-17.773		-78.738		-17.387		-37.365
	0.253		-2.219		1.05		-1.684		-0.206		1.013		-0.136		-0.569	-70		-17.551		-3.603		-8.301		-6.567		-5.044		-20.051		-11.36		-10.09		-4.068		-11.972	-70		-23.092		-17.483		-17.981		-78.581		-17.549		-37.581
	0.286		-2.296		0.873		-1.67		-0.087		0.938		-0.325		-0.577	-70		-17.358		-3.785		-8.182		-6.606		-4.923		-19.988		-11.396		-10.272		-4.331		-12.125	-70		-23.092		-17.311		-17.979		-78.378		-17.71		-37.846
	0.363		-2.276		0.646		-1.649		0.053		0.873		-0.504		-0.553	-70		-17.092		-3.877		-8.111		-6.667		-4.805		-19.863		-11.471		-10.446		-4.628		-12.193	-70		-23.044		-17.187		-17.793		-78.191		-17.861		-38.108
	0.45		-2.189		0.398		-1.637		0.22		0.831		-0.675		-0.516	-70		-16.805		-3.922		-8.139		-6.755		-4.682		-19.664		-11.585		-10.596		-4.908		-12.18	-70		-22.981		-17.097		-17.494		-78.069		-18.003		-38.336
	0.491		-2.087		0.144		-1.643		0.397		0.828		-0.83		-0.482	-70		-16.563		-3.972		-8.271		-6.861		-4.551		-19.402		-11.717		-10.686		-5.123		-12.093	-70		-22.949		-17.012		-17.172		-78.03		-18.144		-38.526
	0.444		-2.013		-0.115		-1.662		0.551		0.87		-0.949		-0.455	-70		-16.426		-4.059		-8.462		-6.981		-4.421		-19.106		-11.839		-10.672		-5.233		-11.946	-70		-22.99		-16.909		-16.899		-78.067		-18.297		-38.7
	0.303		-1.997		-0.378		-1.668		0.647		0.954		-1.01		-0.432	-70		-16.43		-4.189		-8.644		-7.118		-4.306		-18.82		-11.929		-10.524		-5.208		-11.759	-70		-23.117		-16.781		-16.713		-78.169		-18.474		-38.882
	0.108		-2.044		-0.624		-1.626		0.659		1.071		-0.994		-0.409	-70		-16.566		-4.344		-8.76		-7.275		-4.213		-18.589		-11.979		-10.246		-5.045		-11.553	-70		-23.301		-16.646		-16.613		-78.345		-18.674		-39.083
	-0.071		-2.154		-0.817		-1.509		0.577		1.214		-0.894		-0.382	-70		-16.792		-4.496		-8.791		-7.449		-4.141		-18.444		-12.002		-9.877		-4.766		-11.344	-70		-23.478		-16.538		-16.58		-78.62		-18.885		-39.293
	-0.168		-2.323		-0.914		-1.314		0.413		1.384		-0.713		-0.354	-70		-17.047		-4.619		-8.753		-7.614		-4.082		-18.39		-12.009		-9.476		-4.42		-11.147	-70		-23.574		-16.494		-16.599		-79.009		-19.093		-39.493
	-0.146		-2.543		-0.883		-1.068		0.185		1.59		-0.468		-0.326	-70		-17.271		-4.699		-8.68		-7.735		-4.028		-18.407		-12.003		-9.105		-4.068		-10.972	-70		-23.54		-16.527		-16.671		-79.497		-19.284		-39.668
	-0.008		-2.791		-0.715		-0.816		-0.084		1.838		-0.185		-0.295	-70		-17.432		-4.721		-8.593		-7.776		-3.976		-18.449		-11.972		-8.806		-3.773		-10.833	-70		-23.369		-16.627		-16.812		-80.025		-19.449		-39.819
	0.222		-3.029		-0.426		-0.6		-0.373		2.119		0.102		-0.258	-70		-17.52		-4.669		-8.496		-7.721		-3.929		-18.467		-11.9		-8.603		-3.585		-10.736	-70		-23.094		-16.758		-17.036		-80.519		-19.574		-39.963
	0.519		-3.207		-0.052		-0.445		-0.664		2.412		0.364		-0.22	-70		-17.549		-4.525		-8.38		-7.582		-3.892		-18.428		-11.78		-8.497		-3.534		-10.676	-70		-22.767		-16.882		-17.339		-80.911		-19.643		-40.116
	0.867		-3.278		0.363		-0.351		-0.941		2.678		0.583		-0.189	-70		-17.544		-4.286		-8.246		-7.399		-3.882		-18.329		-11.625		-8.476		-3.625		-10.636	-70		-22.428		-16.97		-17.694		-81.165		-19.636		-40.287
	1.263		-3.207		0.775		-0.306		-1.194		2.876		0.76		-0.18	-70		-17.521		-3.978		-8.111		-7.223		-3.921		-18.207		-11.464		-8.526		-3.83		-10.594	-70		-22.096		-17.017		-18.056		-81.273		-19.552		-40.462
	1.692		-2.983		1.148		-0.298		-1.418		2.963		0.907		-0.196	-70		-17.478		-3.659		-8.009		-7.098		-4.03		-18.112		-11.334		-8.629		-4.096		-10.536	-70		-21.781		-17.039		-18.372		-81.248		-19.416		-40.61
	2.117		-2.619		1.458		-0.315		-1.611		2.916		1.046		-0.231	-70		-17.397		-3.399		-7.98		-7.042		-4.215		-18.089		-11.268		-8.776		-4.365		-10.457	-70		-21.501		-17.059		-18.6		-81.112		-19.272		-40.687
	2.48		-2.155		1.697		-0.352		-1.771		2.734		1.19		-0.266	-70		-17.254		-3.247		-8.051		-7.037		-4.457		-18.153		-11.279		-8.961		-4.594		-10.358	-70		-21.297		-17.093		-18.707		-80.898		-19.174		-40.656
	2.719		-1.659		1.869		-0.405		-1.89		2.454		1.342		-0.284	-70		-17.045		-3.202		-8.226		-7.037		-4.712		-18.286		-11.359		-9.186		-4.769		-10.24	-70		-21.214		-17.141		-18.677		-80.651		-19.153		-40.502
	2.792		-1.211		1.975		-0.466		-1.959		2.142		1.49		-0.275	-70		-16.791		-3.213		-8.479		-6.988		-4.916		-18.452		-11.48		-9.455		-4.901		-10.098	-70		-21.284		-17.19		-18.511		-80.419		-19.212		-40.244
	2.697		-0.879		2.015		-0.528		-1.969		1.873		1.622		-0.247	-70		-16.534		-3.204		-8.762		-6.851		-5.004		-18.623		-11.598		-9.761		-5.008		-9.925	-70		-21.504		-17.22		-18.235		-80.238		-19.329		-39.938
	2.474		-0.697		1.982		-0.583		-1.921		1.71		1.734		-0.224	-70		-16.307		-3.115		-9.017		-6.626		-4.938		-18.784		-11.672		-10.08		-5.095		-9.714	-70		-21.834		-17.216		-17.895		-80.11		-19.471		-39.653
	2.194		-0.657		1.874		-0.622		-1.814		1.68		1.832		-0.235	-70		-16.117		-2.922		-9.193		-6.352		-4.718		-18.932		-11.676		-10.372		-5.152		-9.469	-70		-22.216		-17.174		-17.553		-80.008		-19.616		-39.453
	1.932		-0.723		1.698		-0.636		-1.633		1.773		1.928		-0.311	-70		-15.948		-2.639		-9.265		-6.09		-4.399		-19.064		-11.613		-10.591		-5.16		-9.197	-70		-22.598		-17.107		-17.271		-79.893		-19.756		-39.368
	1.741		-0.85		1.468		-0.63		-1.357		1.94		2.022		-0.468	-70		-15.774		-2.294		-9.235		-5.898		-4.067		-19.174		-11.508		-10.704		-5.113		-8.918	-70		-22.949		-17.037		-17.091		-79.75		-19.896		-39.392
	1.625		-1.008		1.21		-0.616		-0.97		2.115		2.098		-0.704	-70		-15.587		-1.907		-9.127		-5.806		-3.812		-19.26		-11.402		-10.707		-5.022		-8.648	-70		-23.26		-16.991		-17.026		-79.603		-20.039		-39.493
	1.549		-1.179		0.96		-0.611		-0.488		2.233		2.127		-0.998	-70		-15.411		-1.486		-8.97		-5.811		-3.705		-19.329		-11.332		-10.622		-4.915		-8.405	-70		-23.533		-16.982		-17.054		-79.508		-20.179		-39.644
	1.455		-1.346		0.759		-0.632		0.034		2.252		2.087		-1.314	-70		-15.286		-1.033		-8.778		-5.893		-3.774		-19.401		-11.322		-10.483		-4.823		-8.197	-70		-23.761		-17.009		-17.131		-79.512		-20.302		-39.83
	1.305		-1.485		0.649		-0.676		0.523		2.165		1.979		-1.602	-70		-15.242		-0.557		-8.553		-6.038		-4.011		-19.5		-11.373		-10.32		-4.766		-8.024	-70		-23.925		-17.064		-17.212		-79.627		-20.392		-40.053
	1.098		-1.567		0.66		-0.731		0.912		1.998		1.827		-1.811	-70		-15.285		-0.084		-8.297		-6.242		-4.384		-19.644		-11.475		-10.15		-4.749		-7.883	-70		-24.008		-17.142		-17.269		-79.826		-20.441		-40.31
	0.873		-1.575		0.785		-0.777		1.162		1.79		1.673		-1.903	-70		-15.391		0.35		-8.029		-6.506		-4.85		-19.84		-11.61		-9.981		-4.767		-7.763	-70		-24.005		-17.246		-17.312		-80.055		-20.452		-40.578
	0.683		-1.523		0.983		-0.804		1.264		1.576		1.557		-1.863	-70		-15.524		0.703		-7.788		-6.821		-5.362		-20.074		-11.767		-9.818		-4.808		-7.651	-70		-23.932		-17.391		-17.379		-80.271		-20.424		-40.814
	0.564		-1.449		1.184		-0.809		1.231		1.372		1.5		-1.709	-70		-15.654		0.933		-7.622		-7.157		-5.873		-20.314		-11.94		-9.674		-4.86		-7.528	-70		-23.805		-17.582		-17.515		-80.458		-20.35		-40.971
	0.514		-1.403		1.314		-0.796		1.083		1.174		1.495		-1.481	-70		-15.771		1.012		-7.57		-7.467		-6.333		-20.527		-12.126		-9.558		-4.91		-7.372	-70		-23.629		-17.8		-17.745		-80.629		-20.218		-41.013
	0.496		-1.419		1.322		-0.758		0.852		0.975		1.508		-1.219	-70		-15.882		0.93		-7.638		-7.7		-6.701		-20.688		-12.313		-9.479		-4.943		-7.165	-70		-23.391		-17.999		-18.055		-80.807		-20.017		-40.924
	0.458		-1.494		1.191		-0.678		0.582		0.773		1.493		-0.955	-70		-15.997		0.702		-7.797		-7.824		-6.956		-20.794		-12.481		-9.438		-4.934		-6.902	-70		-23.079		-18.116		-18.389		-81.008		-19.751		-40.714
	0.37		-1.586		0.936		-0.543		0.326		0.577		1.406		-0.705	-70		-16.114		0.364		-7.992		-7.833		-7.109		-20.863		-12.608		-9.441		-4.858		-6.603	-70		-22.702		-18.101		-18.669		-81.228		-19.445		-40.417
	0.236		-1.634		0.584		-0.354		0.139		0.406		1.237		-0.482	-70		-16.22		-0.032		-8.158		-7.756		-7.206		-20.915		-12.674		-9.501		-4.703		-6.307	-70		-22.303		-17.939		-18.833		-81.44		-19.147		-40.088
	0.094		-1.588		0.162		-0.131		0.052		0.269		1.007		-0.305	-70		-16.299		-0.432		-8.238		-7.649		-7.315		-20.959		-12.677		-9.638		-4.478		-6.066	-70		-21.943		-17.653		-18.857		-81.608		-18.917		-39.803
	-0.004		-1.424		-0.304		0.093		0.065		0.162		0.77		-0.2	-70		-16.35		-0.79		-8.198		-7.584		-7.501		-20.981		-12.627		-9.87		-4.225		-5.919	-70		-21.675		-17.289		-18.776		-81.706		-18.813		-39.625
	-0.014		-1.166		-0.787		0.292		0.143		0.062		0.583		-0.182	-70		-16.393		-1.085		-8.029		-7.627		-7.794		-20.951		-12.551		-10.199		-3.999		-5.885	-70		-21.526		-16.9		-18.66		-81.735		-18.869		-39.583
	0.09		-0.872		-1.246		0.46		0.231		-0.069		0.486		-0.252	-70		-16.452		-1.317		-7.75		-7.819		-8.172		-20.834		-12.479		-10.604		-3.849		-5.96	-70		-21.494		-16.531		-18.581		-81.716		-19.08		-39.646
	0.313		-0.619		-1.63		0.609		0.274		-0.267		0.485		-0.385	-70		-16.536		-1.505		-7.405		-8.159		-8.557		-20.61		-12.443		-11.041		-3.804		-6.127	-70		-21.555		-16.223		-18.577		-81.675		-19.401		-39.738
	0.634		-0.477		-1.887		0.751		0.241		-0.558		0.561		-0.541	-70		-16.628		-1.667		-7.053		-8.596		-8.845		-20.284		-12.466		-11.448		-3.858		-6.365	-70		-21.677		-16.014		-18.636		-81.624		-19.767		-39.775
	1.004		-0.487		-1.986		0.88		0.136		-0.945		0.678		-0.683	-70		-16.699		-1.805		-6.759		-9.046		-8.949		-19.886		-12.554		-11.768		-3.98		-6.662	-70		-21.825		-15.943		-18.707		-81.556		-20.111		-39.705
	1.354		-0.647		-1.922		0.969		-0.006		-1.399		0.799		-0.787	-70		-16.741		-1.906		-6.568		-9.408		-8.836		-19.464		-12.691		-11.962		-4.127		-7.011	-70		-21.967		-16.035		-18.735		-81.448		-20.392		-39.532
	1.604		-0.923		-1.722		0.981		-0.133		-1.86		0.901		-0.847	-70		-16.783		-1.952		-6.487		-9.606		-8.534		-19.069		-12.841		-12.023		-4.254		-7.403	-70		-22.072		-16.289		-18.689		-81.282		-20.594		-39.301
	1.703		-1.261		-1.433		0.89		-0.209		-2.249		0.973		-0.865	-70		-16.882		-1.939		-6.484		-9.611		-8.11		-18.735		-12.958		-11.973		-4.334		-7.818	-70		-22.118		-16.664		-18.578		-81.054		-20.736		-39.073
	1.653		-1.606		-1.113		0.698		-0.23		-2.49		1.018		-0.834	-70		-17.097		-1.886		-6.498		-9.451		-7.646		-18.47		-13.004		-11.842		-4.359		-8.214	-70		-22.095		-17.09		-18.436		-80.778		-20.848		-38.894
	1.515		-1.912		-0.821		0.434		-0.23		-2.534		1.05		-0.744	-70		-17.441		-1.824		-6.47		-9.196		-7.21		-18.256		-12.961		-11.659		-4.337		-8.539	-70		-22.015		-17.487		-18.303		-80.471		-20.966		-38.79
	1.383		-2.144		-0.612		0.141		-0.254		-2.378		1.09		-0.585	-70		-17.88		-1.783		-6.364		-8.922		-6.85		-18.059		-12.838		-11.435		-4.286		-8.746	-70		-21.907		-17.789		-18.193		-80.137		-21.107		-38.769
	1.341		-2.275		-0.523		-0.143		-0.326		-2.061		1.149		-0.369	-70		-18.339		-1.777		-6.181		-8.683		-6.585		-17.849		-12.668		-11.174		-4.217		-8.815	-70		-21.815		-17.969		-18.091		-79.77		-21.25		-38.827
	1.428		-2.28		-0.561		-0.393		-0.433		-1.654		1.234		-0.134	-70		-18.743		-1.799		-5.942		-8.488		-6.403		-17.616		-12.498		-10.885		-4.13		-8.761	-70		-21.771		-18.039		-17.963		-79.353		-21.347		-38.95
	1.617		-2.147		-0.699		-0.599		-0.525		-1.236		1.347		0.064	-70		-19.037		-1.834		-5.681		-8.31		-6.264		-17.371		-12.379		-10.596		-4.018		-8.623	-70		-21.783		-18.029		-17.783		-78.883		-21.333		-39.112
	1.838		-1.88		-0.883		-0.758		-0.546		-0.871		1.49		0.175	-70		-19.203		-1.867		-5.427		-8.103		-6.119		-17.141		-12.343		-10.358		-3.875		-8.448	-70		-21.827		-17.967		-17.546		-78.379		-21.161		-39.278
	2.013		-1.512		-1.048		-0.861		-0.465		-0.592		1.662		0.178	-70		-19.243		-1.897		-5.199		-7.837		-5.93		-16.96		-12.393		-10.225		-3.705		-8.281	-70		-21.863		-17.858		-17.276		-77.884		-20.824		-39.414
	2.09		-1.099		-1.141		-0.9		-0.294		-0.402		1.853		0.09	-70		-19.17		-1.936		-5.006		-7.508		-5.694		-16.857		-12.497		-10.23		-3.519		-8.161	-70		-21.856		-17.696		-17.015		-77.448		-20.359		-39.498
	2.059		-0.701		-1.137		-0.877		-0.081		-0.274		2.029		-0.041	-70		-18.997		-2.003		-4.856		-7.145		-5.443		-16.85		-12.603		-10.365		-3.332		-8.128	-70		-21.798		-17.474		-16.806		-77.106		-19.827		-39.536
	1.95		-0.365		-1.041		-0.811		0.121		-0.165		2.145		-0.157	-70		-18.748		-2.108		-4.756		-6.794		-5.224		-16.941		-12.657		-10.58		-3.15		-8.219	-70		-21.716		-17.203		-16.676		-76.866		-19.29		-39.554
	1.812		-0.11		-0.884		-0.732		0.268		-0.036		2.161		-0.218	-70		-18.459		-2.245		-4.717		-6.504		-5.079		-17.1		-12.623		-10.805		-2.968		-8.447	-70		-21.654		-16.904		-16.635		-76.707		-18.787		-39.59
	1.698		0.072		-0.704		-0.66		0.348		0.137		2.067		-0.214	-70		-18.174		-2.392		-4.746		-6.316		-5.027		-17.28		-12.487		-10.977		-2.774		-8.791	-70		-21.652		-16.602		-16.664		-76.594		-18.323		-39.676
	1.647		0.201		-0.533		-0.59		0.372		0.353		1.884		-0.163	-70		-17.931		-2.518		-4.833		-6.253		-5.064		-17.423		-12.257		-11.059		-2.562		-9.188	-70		-21.721		-16.31		-16.73		-76.496		-17.882		-39.823
	1.665		0.298		-0.387		-0.511		0.367		0.598		1.654		-0.108	-70		-17.744		-2.597		-4.955		-6.315		-5.168		-17.489		-11.951		-11.029		-2.341		-9.552	-70		-21.838		-16.027		-16.799		-76.398		-17.436		-40.014
	1.722		0.379		-0.276		-0.419		0.361		0.854		1.413		-0.097	-70		-17.613		-2.619		-5.084		-6.472		-5.31		-17.468		-11.602		-10.887		-2.138		-9.803	-70		-21.957		-15.747		-16.849		-76.306		-16.963		-40.21
	1.768		0.453		-0.209		-0.335		0.367		1.107		1.187		-0.162	-70		-17.531		-2.591		-5.197		-6.664		-5.454		-17.389		-11.248		-10.644		-1.981		-9.907	-70		-22.04		-15.466		-16.887		-76.234		-16.454		-40.37
	1.749		0.519		-0.193		-0.297		0.379		1.344		0.984		-0.305	-70		-17.504		-2.537		-5.293		-6.819		-5.568		-17.295		-10.937		-10.33		-1.886		-9.883	-70		-22.071		-15.192		-16.934		-76.208		-15.921		-40.473
	1.633		0.562		-0.226		-0.338		0.375		1.539		0.808		-0.496	-70		-17.536		-2.489		-5.381		-6.874		-5.624		-17.226		-10.719		-9.987		-1.85		-9.799	-70		-22.056		-14.943		-17.012		-76.253		-15.388		-40.523
	1.421		0.555		-0.284		-0.462		0.333		1.657		0.66		-0.686	-70		-17.616		-2.466		-5.476		-6.8		-5.608		-17.195		-10.635		-9.66		-1.86		-9.732	-70		-22.017		-14.743		-17.123		-76.393		-14.893		-40.555
	1.135		0.468		-0.332		-0.637		0.246		1.661		0.539		-0.83	-70		-17.699		-2.468		-5.583		-6.613		-5.524		-17.19		-10.7		-9.387		-1.905		-9.73	-70		-21.971		-14.615		-17.25		-76.652		-14.481		-40.609
	0.817		0.283		-0.336		-0.804		0.129		1.532		0.441		-0.903	-70		-17.72		-2.471		-5.695		-6.37		-5.385		-17.193		-10.899		-9.196		-1.985		-9.792	-70		-21.927		-14.579		-17.368		-77.041		-14.186		-40.717
	0.516		0.004		-0.28		-0.904		0.01		1.287		0.366		-0.906	-70		-17.622		-2.444		-5.799		-6.147		-5.204		-17.203		-11.184		-9.1		-2.102		-9.875	-70		-21.886		-14.649		-17.461		-77.56		-14.027		-40.879
	0.283		-0.341		-0.177		-0.9		-0.088		0.979		0.318		-0.862	-70		-17.385		-2.368		-5.873		-6.011		-4.991		-17.247		-11.494		-9.099		-2.249		-9.917	-70		-21.848		-14.834		-17.53		-78.185		-13.993		-41.06
	0.156		-0.707		-0.055		-0.799		-0.163		0.67		0.306		-0.795	-70		-17.04		-2.252		-5.895		-5.995		-4.744		-17.375		-11.772		-9.173		-2.403		-9.876	-70		-21.816		-15.125		-17.589		-78.862		-14.048		-41.206
	0.148		-1.038		0.058		-0.641		-0.238		0.415		0.339		-0.71	-70		-16.645		-2.128		-5.849		-6.094		-4.464		-17.63		-11.983		-9.297		-2.539		-9.746	-70		-21.788		-15.496		-17.645		-79.522		-14.144		-41.263
	0.237		-1.295		0.145		-0.482		-0.345		0.24		0.423		-0.594	-70		-16.267		-2.036		-5.727		-6.268		-4.157		-18.021		-12.117		-9.443		-2.64		-9.559	-70		-21.761		-15.889		-17.689		-80.088		-14.236		-41.215
	0.381		-1.469		0.198		-0.354		-0.503		0.137		0.552		-0.416	-70		-15.956		-2.005		-5.534		-6.471		-3.85		-18.511		-12.179		-9.599		-2.709		-9.368	-70		-21.732		-16.227		-17.694		-80.502		-14.304		-41.095
	0.537		-1.588		0.22		-0.261		-0.698		0.075		0.712		-0.164	-70		-15.739		-2.035		-5.279		-6.669		-3.575		-19.035		-12.176		-9.764		-2.762		-9.224	-70		-21.704		-16.44		-17.638		-80.731		-14.357		-40.974
	0.674		-1.702		0.22		-0.177		-0.89		0.015		0.88		0.148	-70		-15.625		-2.107		-4.973		-6.843		-3.37		-19.524		-12.119		-9.937		-2.82		-9.157	-70		-21.694		-16.491		-17.516		-80.769		-14.426		-40.925
	0.778		-1.853		0.213		-0.072		-1.025		-0.072		1.035		0.47	-70		-15.618		-2.199		-4.636		-6.985		-3.259		-19.936		-12.02		-10.104		-2.892		-9.166	-70		-21.726		-16.394		-17.347		-80.639		-14.543		-40.988
	0.843		-2.053		0.214		0.07		-1.064		-0.194		1.16		0.739	-70		-15.715		-2.3		-4.302		-7.079		-3.249		-20.258		-11.906		-10.23		-2.977		-9.222	-70		-21.829		-16.201		-17.164		-80.383		-14.718		-41.141
	0.862		-2.281		0.228		0.242		-0.999		-0.34		1.247		0.913	-70		-15.906		-2.415		-4.023		-7.103		-3.333		-20.499		-11.808		-10.276		-3.058		-9.288	-70		-22.016		-15.976		-16.99		-80.048		-14.937		-41.319
	0.834		-2.499		0.244		0.418		-0.845		-0.489		1.304		0.993	-70		-16.166		-2.56		-3.859		-7.031		-3.497		-20.673		-11.756		-10.21		-3.116		-9.34	-70		-22.275		-15.771		-16.831		-79.668		-15.172		-41.443
	0.771		-2.674		0.237		0.555		-0.633		-0.62		1.35		1.016	-70		-16.454		-2.743		-3.861		-6.85		-3.726		-20.783		-11.762		-10.021		-3.132		-9.368	-70		-22.576		-15.609		-16.684		-79.248		-15.393		-41.463
	0.714		-2.786		0.191		0.611		-0.39		-0.724		1.417		1.037	-70		-16.724		-2.954		-4.038		-6.569		-4.011		-20.82		-11.815		-9.723		-3.101		-9.38	-70		-22.883		-15.491		-16.548		-78.766		-15.586		-41.382
	0.723		-2.831		0.104		0.561		-0.135		-0.803		1.53		1.096	-70		-16.944		-3.167		-4.353		-6.225		-4.341		-20.767		-11.879		-9.347		-3.03		-9.393	-70		-23.177		-15.404		-16.437		-78.197		-15.742		-41.249
	0.854		-2.807		-0.009		0.408		0.114		-0.864		1.696		1.208	-70		-17.105		-3.348		-4.727		-5.863		-4.707		-20.616		-11.913		-8.936		-2.94		-9.423	-70		-23.455		-15.343		-16.374		-77.544		-15.849		-41.134
	1.132		-2.711		-0.127		0.183		0.332		-0.916		1.897		1.353	-70		-17.219		-3.466		-5.074		-5.524		-5.099		-20.383		-11.878		-8.528		-2.861		-9.489	-70		-23.721		-15.305		-16.375		-76.854		-15.89		-41.09
	1.53		-2.542		-0.238		-0.066		0.49		-0.957		2.097		1.5	-70		-17.316		-3.507		-5.331		-5.224		-5.504		-20.103		-11.754		-8.154		-2.823		-9.612	-70		-23.967		-15.287		-16.436		-76.22		-15.85		-41.131
	1.982		-2.312		-0.333		-0.295		0.564		-0.978		2.254		1.622	-70		-17.421		-3.471		-5.478		-4.961		-5.912		-19.827		-11.539		-7.834		-2.851		-9.805	-70		-24.177		-15.272		-16.533		-75.746		-15.738		-41.233
	2.41		-2.052		-0.399		-0.472		0.549		-0.962		2.344		1.707	-70		-17.549		-3.38		-5.532		-4.721		-6.307		-19.597		-11.251		-7.589		-2.947		-10.07	-70		-24.332		-15.234		-16.628		-75.513		-15.587		-41.351
	2.752		-1.797		-0.413		-0.582		0.456		-0.893		2.364		1.757	-70		-17.695		-3.264		-5.532		-4.502		-6.67		-19.436		-10.929		-7.443		-3.095		-10.391	-70		-24.422		-15.15		-16.699		-75.554		-15.446		-41.444
	2.978		-1.569		-0.349		-0.627		0.307		-0.76		2.332		1.775	-70		-17.841		-3.154		-5.523		-4.319		-6.974		-19.338		-10.632		-7.424		-3.256		-10.738	-70		-24.449		-15.019		-16.742		-75.845		-15.346		-41.497
	3.092		-1.369		-0.192		-0.628		0.124		-0.561		2.271		1.749	-70		-17.969		-3.063		-5.548		-4.206		-7.189		-19.286		-10.423		-7.551		-3.388		-11.073	-70		-24.429		-14.861		-16.779		-76.322		-15.286		-41.516
	3.121		-1.177		0.05		-0.614		-0.073		-0.302		2.202		1.66	-70		-18.065		-2.989		-5.641		-4.202		-7.294		-19.259		-10.359		-7.818		-3.461		-11.363	-70		-24.378		-14.713		-16.838		-76.891		-15.23		-41.519
	3.106		-0.972		0.342		-0.617		-0.257		-0.002		2.137		1.5	-70		-18.126		-2.912		-5.811		-4.335		-7.289		-19.249		-10.459		-8.189		-3.471		-11.59	-70		-24.307		-14.601		-16.935		-77.449		-15.126		-41.517
	3.095		-0.749		0.632		-0.653		-0.396		0.314		2.077		1.285	-70		-18.156		-2.816		-6.042		-4.609		-7.203		-19.257		-10.695		-8.604		-3.44		-11.753	-70		-24.217		-14.531		-17.067		-77.897		-14.937		-41.513
	3.128		-0.524		0.865		-0.711		-0.453		0.614		2.018		1.054	-70		-18.164		-2.697		-6.289		-5.001		-7.079		-19.287		-10.991		-8.997		-3.408		-11.861	-70		-24.104		-14.48		-17.221		-78.163		-14.654		-41.498
	3.223		-0.319		1.006		-0.756		-0.392		0.87		1.938		0.849	-70		-18.158		-2.566		-6.493		-5.459		-6.953		-19.345		-11.254		-9.318		-3.41		-11.931	-70		-23.971		-14.42		-17.393		-78.215		-14.308		-41.46
	3.365		-0.15		1.046		-0.74		-0.192		1.068		1.814		0.694	-70		-18.141		-2.44		-6.598		-5.916		-6.838		-19.438		-11.405		-9.546		-3.471		-11.972	-70		-23.832		-14.333		-17.598		-78.071		-13.956		-41.386
	3.518		-0.019		1.009		-0.629		0.139		1.209		1.631		0.586	-70		-18.114		-2.326		-6.58		-6.303		-6.721		-19.573		-11.415		-9.684		-3.594		-11.988	-70		-23.716		-14.23		-17.863		-77.789		-13.661		-41.272
	3.64		0.085		0.933		-0.423		0.551		1.316		1.392		0.51	-70		-18.066		-2.209		-6.456		-6.567		-6.583		-19.753		-11.304		-9.748		-3.768		-11.973	-70		-23.652		-14.148		-18.198		-77.449		-13.47		-41.124
	3.702		0.169		0.853		-0.153		0.963		1.414		1.123		0.451	-70		-17.99		-2.063		-6.274		-6.685		-6.413		-19.977		-11.127		-9.751		-3.965		-11.92	-70		-23.655		-14.127		-18.573		-77.133		-13.397		-40.957
	3.702		0.238		0.779		0.127		1.279		1.526		0.851		0.403	-70		-17.877		-1.869		-6.094		-6.672		-6.22		-20.234		-10.946		-9.689		-4.147		-11.821	-70		-23.727		-14.191		-18.919		-76.902		-13.426		-40.797
	3.649		0.287		0.702		0.362		1.424		1.654		0.59		0.366	-70		-17.731		-1.636		-5.958		-6.57		-6.026		-20.503		-10.812		-9.556		-4.274		-11.678	-70		-23.858		-14.327		-19.155		-76.785		-13.532		-40.675
	3.554		0.31		0.603		0.513		1.378		1.778		0.337		0.335	-70		-17.561		-1.408		-5.878		-6.428		-5.86		-20.76		-10.756		-9.352		-4.317		-11.503	-70		-24.041		-14.488		-19.223		-76.778		-13.686		-40.62
	3.424		0.305		0.48		0.561		1.179		1.864		0.081		0.297	-70		-17.382		-1.248		-5.832		-6.287		-5.74		-20.982		-10.805		-9.103		-4.272		-11.315	-70		-24.266		-14.618		-19.117		-76.851		-13.872		-40.658
	3.266		0.271		0.348		0.504		0.91		1.88		-0.178		0.236	-70		-17.213		-1.205		-5.778		-6.169		-5.669		-21.155		-10.975		-8.856		-4.168		-11.136	-70		-24.517		-14.673		-18.871		-76.966		-14.07		-40.807
	3.093		0.198		0.232		0.351		0.653		1.815		-0.427		0.14	-70		-17.076		-1.289		-5.679		-6.086		-5.635		-21.274		-11.272		-8.661		-4.051		-10.987	-70		-24.764		-14.648		-18.542		-77.089		-14.253		-41.068
	2.929		0.072		0.15		0.123		0.461		1.68		-0.634		0.012	-70		-16.993		-1.466		-5.515		-6.043		-5.62		-21.347		-11.68		-8.555		-3.96		-10.885	-70		-24.968		-14.577		-18.18		-77.204		-14.39		-41.419
	2.797		-0.124		0.101		-0.149		0.334		1.504		-0.762		-0.138	-70		-16.983		-1.681		-5.295		-6.051		-5.613		-21.388		-12.156		-8.554		-3.906		-10.842	-70		-25.091		-14.515		-17.828		-77.31		-14.457		-41.816
	2.71		-0.381		0.076		-0.428		0.233		1.323		-0.786		-0.29	-70		-17.055		-1.883		-5.048		-6.119		-5.622		-21.401		-12.636		-8.654		-3.869		-10.867	-70		-25.118		-14.514		-17.524		-77.419		-14.448		-42.193
	2.66		-0.658		0.065		-0.679		0.109		1.163		-0.707		-0.435	-70		-17.197		-2.047		-4.805		-6.246		-5.668		-21.381		-13.048		-8.837		-3.819		-10.958	-70		-25.057		-14.6		-17.304		-77.542		-14.365		-42.47
	2.623		-0.89		0.064		-0.886		-0.061		1.033		-0.558		-0.574	-70		-17.386		-2.181		-4.589		-6.418		-5.776		-21.312		-13.335		-9.078		-3.74		-11.104	-70		-24.942		-14.763		-17.192		-77.682		-14.216		-42.574
	2.566		-1.015		0.061		-1.052		-0.26		0.921		-0.398		-0.717	-70		-17.589		-2.308		-4.408		-6.606		-5.958		-21.187		-13.47		-9.345		-3.645		-11.282	-70		-24.819		-14.969		-17.188		-77.835		-14.005		-42.452
	2.458		-1.011		0.032		-1.198		-0.431		0.796		-0.288		-0.873	-70		-17.77		-2.454		-4.268		-6.77		-6.201		-21.011		-13.463		-9.6		-3.559		-11.463	-70		-24.734		-15.176		-17.26		-77.987		-13.743		-42.098
	2.282		-0.904		-0.054		-1.344		-0.512		0.622		-0.269		-1.037	-70		-17.9		-2.627		-4.181		-6.875		-6.481		-20.807		-13.364		-9.809		-3.496		-11.623	-70		-24.714		-15.357		-17.362		-78.12		-13.456		-41.563
	2.035		-0.759		-0.216		-1.494		-0.462		0.374		-0.345		-1.19	-70		-17.955		-2.822		-4.18		-6.903		-6.767		-20.602		-13.236		-9.938		-3.443		-11.742	-70		-24.768		-15.506		-17.446		-78.219		-13.185		-40.937
	1.725		-0.641		-0.444		-1.628		-0.286		0.046		-0.484		-1.308	-70		-17.924		-3.023		-4.305		-6.853		-7.032		-20.416		-13.134		-9.965		-3.376		-11.809	-70		-24.882		-15.629		-17.487		-78.275		-12.986		-40.324
	1.362		-0.585		-0.706		-1.713		-0.027		-0.344		-0.636		-1.367	-70		-17.813		-3.217		-4.582		-6.746		-7.262		-20.256		-13.081		-9.884		-3.279		-11.809	-70		-25.032		-15.732		-17.478		-78.285		-12.91		-39.814
	0.955		-0.581		-0.958		-1.724		0.253		-0.763		-0.756		-1.351	-70		-17.642		-3.391		-5.008		-6.611		-7.444		-20.12		-13.072		-9.709		-3.162		-11.722	-70		-25.194		-15.817		-17.43		-78.25		-12.983		-39.459
	0.509		-0.586		-1.168		-1.654		0.503		-1.17		-0.82		-1.252	-70		-17.437		-3.532		-5.547		-6.478		-7.567		-20.012		-13.093		-9.472		-3.063		-11.529	-70		-25.358		-15.882		-17.36		-78.173		-13.199		-39.274
	0.033		-0.554		-1.32		-1.526		0.699		-1.521		-0.825		-1.073	-70		-17.218		-3.619		-6.146		-6.373		-7.622		-19.942		-13.132		-9.208		-3.022		-11.223	-70		-25.53		-15.929		-17.294		-78.054		-13.522		-39.237
	-0.455		-0.456		-1.407		-1.377		0.838		-1.779		-0.783		-0.829	-70		-17.004		-3.636		-6.755		-6.314		-7.605		-19.934		-13.193		-8.946		-3.065		-10.822	-70		-25.725		-15.966		-17.259		-77.892		-13.894		-39.295
	-0.928		-0.294		-1.422		-1.229		0.919		-1.916		-0.704		-0.553	-70		-16.816		-3.578		-7.335		-6.309		-7.517		-20.015		-13.279		-8.699		-3.193		-10.38	-70		-25.952		-15.998		-17.269		-77.688		-14.258		-39.382
	-1.357		-0.089		-1.359		-1.079		0.932		-1.923		-0.589		-0.286	-70		-16.671		-3.463		-7.856		-6.354		-7.368		-20.196		-13.389		-8.466		-3.38		-9.97	-70		-26.2		-16.028		-17.321		-77.45		-14.564		-39.446
	-1.715		0.129		-1.219		-0.891		0.861		-1.809		-0.434		-0.071	-70		-16.585		-3.33		-8.281		-6.437		-7.169		-20.459		-13.512		-8.238		-3.591		-9.664	-70		-26.44		-16.052		-17.392		-77.196		-14.774		-39.473
	-1.973		0.336		-1.026		-0.633		0.707		-1.603		-0.233		0.06	-70		-16.558		-3.223		-8.569		-6.531		-6.93		-20.757		-13.629		-8.009		-3.788		-9.505	-70		-26.645		-16.081		-17.448		-76.955		-14.87		-39.485
	-2.096		0.505		-0.822		-0.293		0.502		-1.347		0.008		0.091	-70		-16.571		-3.178		-8.68		-6.607		-6.663		-21.024		-13.723		-7.781		-3.94		-9.492	-70		-26.801		-16.135		-17.466		-76.759		-14.852		-39.526
	-2.052		0.605		-0.657		0.101		0.306		-1.083		0.269		0.028	-70		-16.591		-3.207		-8.593		-6.638		-6.393		-21.199		-13.783		-7.567		-4.03		-9.588	-70		-26.912		-16.24		-17.438		-76.63		-14.743		-39.629
	-1.822		0.6		-0.573		0.493		0.178		-0.839		0.515		-0.105	-70		-16.582		-3.301		-8.328		-6.61		-6.158		-21.248		-13.804		-7.384		-4.055		-9.738	-70		-26.983		-16.404		-17.381		-76.565		-14.581		-39.791
	-1.425		0.458		-0.587		0.822		0.147		-0.634		0.708		-0.275	-70		-16.516		-3.446		-7.944		-6.527		-6.004		-21.172		-13.788		-7.246		-4.025		-9.89	-70		-27.004		-16.604		-17.317		-76.534		-14.408		-39.972
	-0.924		0.17		-0.684		1.038		0.19		-0.475		0.823		-0.447	-70		-16.383		-3.625		-7.525		-6.404		-5.962		-21.003		-13.742		-7.164		-3.966		-10.012	-70		-26.945		-16.793		-17.265		-76.495		-14.262		-40.112
	-0.411		-0.233		-0.829		1.11		0.246		-0.369		0.863		-0.596	-70		-16.201		-3.815		-7.161		-6.255		-6.035		-20.791		-13.67		-7.143		-3.909		-10.095	-70		-26.778		-16.918		-17.223		-76.413		-14.172		-40.16
	0.025		-0.688		-0.972		1.038		0.242		-0.315		0.855		-0.708	-70		-16.006		-3.981		-6.914		-6.084		-6.192		-20.586		-13.574		-7.184		-3.884		-10.15	-70		-26.5		-16.937		-17.174		-76.276		-14.159		-40.095
	0.321		-1.12		-1.073		0.855		0.126		-0.296		0.835		-0.779	-70		-15.841		-4.076		-6.799		-5.881		-6.376		-20.422		-13.455		-7.284		-3.911		-10.203	-70		-26.154		-16.824		-17.095		-76.093		-14.232		-39.935
	0.455		-1.465		-1.104		0.62		-0.105		-0.273		0.831		-0.812	-70		-15.739		-4.056		-6.781		-5.643		-6.525		-20.309		-13.326		-7.431		-4		-10.283	-70		-25.817		-16.578		-16.969		-75.887		-14.393		-39.728
	0.439		-1.694		-1.061		0.404		-0.406		-0.201		0.846		-0.82	-70		-15.717		-3.901		-6.797		-5.382		-6.588		-20.233		-13.214		-7.605		-4.147		-10.407	-70		-25.567		-16.209		-16.798		-75.674		-14.626		-39.526
	0.306		-1.814		-0.962		0.26		-0.701		-0.046		0.863		-0.819	-70		-15.764		-3.634		-6.789		-5.133		-6.54		-20.164		-13.15		-7.784		-4.337		-10.573	-70		-25.444		-15.746		-16.605		-75.455		-14.907		-39.364
	0.096		-1.855		-0.84		0.207		-0.916		0.188		0.852		-0.824	-70		-15.85		-3.312		-6.729		-4.939		-6.381		-20.075		-13.162		-7.946		-4.544		-10.759	-70		-25.427		-15.232		-16.426		-75.215		-15.208		-39.241
	-0.151		-1.846		-0.737		0.227		-1.007		0.464		0.784		-0.838	-70		-15.937		-3.006		-6.631		-4.833		-6.133		-19.959		-13.25		-8.071		-4.72		-10.939	-70		-25.448		-14.731		-16.297		-74.941		-15.509		-39.126
	-0.393		-1.798		-0.689		0.289		-0.969		0.725		0.647		-0.852	-70		-15.994		-2.774		-6.536		-4.827		-5.826		-19.839		-13.395		-8.146		-4.807		-11.093	-70		-25.427		-14.314		-16.241		-74.633		-15.788		-38.973
	-0.599		-1.701		-0.714		0.367		-0.837		0.923		0.451		-0.85	-70		-16.009		-2.642		-6.484		-4.908		-5.489		-19.758		-13.563		-8.157		-4.75		-11.22	-70		-25.315		-14.044		-16.258		-74.31		-16.024		-38.753
	-0.746		-1.538		-0.805		0.45		-0.659		1.029		0.233		-0.819	-70		-15.988		-2.597		-6.498		-5.04		-5.151		-19.755		-13.724		-8.099		-4.527		-11.334	-70		-25.109		-13.952		-16.331		-74.003		-16.196		-38.482
	-0.828		-1.303		-0.937		0.537		-0.478		1.04		0.045		-0.756	-70		-15.942		-2.597		-6.56		-5.178		-4.84		-19.85		-13.859		-7.978		-4.159		-11.456	-70		-24.845		-14.029		-16.432		-73.744		-16.282		-38.213
	-0.856		-1.016		-1.073		0.619		-0.319		0.972		-0.058		-0.671	-70		-15.878		-2.592		-6.63		-5.289		-4.589		-20.035		-13.96		-7.814		-3.71		-11.595	-70		-24.577		-14.229		-16.537		-73.557		-16.266		-38.014
	-0.856		-0.717		-1.192		0.68		-0.18		0.849		-0.043		-0.577	-70		-15.791		-2.549		-6.665		-5.363		-4.43		-20.292		-14.023		-7.643		-3.258		-11.75	-70		-24.354		-14.487		-16.63		-73.448		-16.142		-37.929
	-0.858		-0.461		-1.288		0.696		-0.038		0.702		0.089		-0.484	-70		-15.677		-2.469		-6.644		-5.422		-4.38		-20.598		-14.051		-7.501		-2.872		-11.907	-70		-24.202		-14.741		-16.697		-73.412		-15.918		-37.956
	-0.89		-0.299		-1.376		0.653		0.145		0.562		0.298		-0.395	-70		-15.541		-2.386		-6.58		-5.498		-4.436		-20.932		-14.052		-7.41		-2.589		-12.051	-70		-24.123		-14.95		-16.713		-73.431		-15.625		-38.056
	-0.961		-0.259		-1.477		0.548		0.4		0.448		0.521		-0.305	-70		-15.411		-2.342		-6.506		-5.613		-4.576		-21.268		-14.038		-7.372		-2.419		-12.176	-70		-24.097		-15.095		-16.641		-73.481		-15.315		-38.186
	-1.06		-0.345		-1.608		0.395		0.727		0.361		0.692		-0.207	-70		-15.329		-2.362		-6.463		-5.753		-4.772		-21.564		-14.021		-7.365		-2.351		-12.282	-70		-24.087		-15.175		-16.446		-73.537		-15.043		-38.329
	-1.151		-0.524		-1.777		0.221		1.087		0.284		0.759		-0.1	-70		-15.329		-2.441		-6.477		-5.879		-4.998		-21.776		-14.011		-7.361		-2.372		-12.377	-70		-24.056		-15.2		-16.119		-73.581		-14.852		-38.496
	-1.193		-0.742		-1.986		0.052		1.407		0.201		0.694		0.011	-70		-15.421		-2.552		-6.557		-5.943		-5.229		-21.872		-14.008		-7.342		-2.471		-12.463	-70		-23.982		-15.188		-15.699		-73.605		-14.752		-38.713
	-1.154		-0.934		-2.228		-0.098		1.609		0.113		0.495		0.119	-70		-15.57		-2.664		-6.694		-5.914		-5.435		-21.848		-14.006		-7.316		-2.637		-12.534	-70		-23.864		-15.164		-15.266		-73.617		-14.725		-38.981
	-1.029		-1.045		-2.49		-0.234		1.64		0.047		0.191		0.224	-70		-15.713		-2.763		-6.867		-5.795		-5.577		-21.731		-13.992		-7.309		-2.853		-12.579	-70		-23.723		-15.148		-14.912		-73.627		-14.74		-39.271
	-0.838		-1.05		-2.746		-0.378		1.5		0.041		-0.163		0.327	-70		-15.789		-2.854		-7.047		-5.613		-5.623		-21.563		-13.949		-7.356		-3.094		-12.585	-70		-23.587		-15.144		-14.708		-73.642		-14.77		-39.534
	-0.623		-0.956		-2.967		-0.552		1.236		0.126		-0.495		0.435	-70		-15.763		-2.953		-7.208		-5.404		-5.558		-21.381		-13.861		-7.476		-3.33		-12.546	-70		-23.495		-15.143		-14.675		-73.656		-14.802		-39.727
	-0.428		-0.796		-3.131		-0.767		0.919		0.301		-0.736		0.549	-70		-15.648		-3.071		-7.342		-5.195		-5.403		-21.201		-13.718		-7.669		-3.54		-12.472	-70		-23.48		-15.13		-14.788		-73.657		-14.832		-39.839
	-0.276		-0.604		-3.237		-1.017		0.617		0.536		-0.839		0.67	-70		-15.483		-3.201		-7.461		-4.987		-5.211		-21.024		-13.515		-7.915		-3.712		-12.384	-70		-23.567		-15.101		-14.993		-73.636		-14.854		-39.882
	-0.169		-0.404		-3.297		-1.28		0.366		0.78		-0.793		0.802	-70		-15.311		-3.32		-7.596		-4.769		-5.044		-20.846		-13.25		-8.18		-3.849		-12.309	-70		-23.759		-15.068		-15.224		-73.6		-14.846		-39.883
	-0.089		-0.197		-3.332		-1.533		0.161		0.98		-0.619		0.952	-70		-15.148		-3.395		-7.771		-4.527		-4.956		-20.665		-12.924		-8.421		-3.96		-12.268	-70		-24.033		-15.05		-15.426		-73.566		-14.779		-39.866
	-0.016		0.026		-3.348		-1.756		-0.029		1.102		-0.363		1.126	-70		-14.985		-3.409		-7.991		-4.272		-4.977		-20.492		-12.557		-8.591		-4.045		-12.273	-70		-24.348		-15.052		-15.554		-73.554		-14.639		-39.843
	0.064		0.265		-3.333		-1.938		-0.233		1.142		-0.078		1.321	-70		-14.797		-3.371		-8.219		-4.047		-5.114		-20.339		-12.179		-8.647		-4.09		-12.329	-70		-24.653		-15.068		-15.587		-73.582		-14.445		-39.817
	0.146		0.505		-3.269		-2.073		-0.458		1.126		0.181		1.515	-70		-14.564		-3.319		-8.396		-3.907		-5.352		-20.22		-11.832		-8.566		-4.071		-12.432	-70		-24.906		-15.075		-15.531		-73.66		-14.257		-39.782
	0.218		0.711		-3.154		-2.16		-0.684		1.097		0.359		1.674	-70		-14.286		-3.306		-8.458		-3.898		-5.661		-20.137		-11.554		-8.353		-3.959		-12.578	-70		-25.073		-15.057		-15.42		-73.802		-14.146		-39.722
	0.261		0.844		-3.008		-2.205		-0.875		1.098		0.412		1.768	-70		-13.992		-3.373		-8.367		-4.039		-5.997		-20.094		-11.361		-8.044		-3.745		-12.757	-70		-25.13		-15.003		-15.3		-74.012		-14.16		-39.621
	0.26		0.869		-2.877		-2.221		-1.004		1.142		0.321		1.782	-70		-13.726		-3.529		-8.13		-4.318		-6.308		-20.092		-11.253		-7.695		-3.452		-12.95	-70		-25.067		-14.915		-15.213		-74.277		-14.291		-39.474
	0.206		0.76		-2.812		-2.222		-1.061		1.21		0.109		1.724	-70		-13.53		-3.746		-7.79		-4.708		-6.552		-20.137		-11.217		-7.369		-3.131		-13.134	-70		-24.888		-14.802		-15.178		-74.554		-14.489		-39.303
	0.101		0.505		-2.849		-2.222		-1.052		1.258		-0.16		1.612	-70		-13.43		-3.968		-7.413		-5.178		-6.705		-20.23		-11.235		-7.125		-2.847		-13.285	-70		-24.623		-14.677		-15.19		-74.786		-14.688		-39.155
	-0.043		0.116		-3		-2.224		-0.988		1.245		-0.405		1.468	-70		-13.42		-4.134		-7.067		-5.697		-6.76		-20.361		-11.289		-7.001		-2.655		-13.394	-70		-24.326		-14.563		-15.24		-74.923		-14.838		-39.092
	-0.206		-0.363		-3.245		-2.224		-0.871		1.159		-0.559		1.306	-70		-13.473		-4.207		-6.81		-6.223		-6.721		-20.505		-11.361		-7.018		-2.575		-13.476	-70		-24.067		-14.48		-15.326		-74.949		-14.925		-39.158
	-0.362		-0.865		-3.542		-2.213		-0.703		1.029		-0.592		1.132	-70		-13.557		-4.185		-6.672		-6.706		-6.587		-20.623		-11.432		-7.168		-2.589		-13.563	-70		-23.911		-14.445		-15.454		-74.884		-14.956		-39.365
	-0.483		-1.311		-3.841		-2.185		-0.503		0.914		-0.514		0.953	-70		-13.661		-4.095		-6.652		-7.088		-6.356		-20.672		-11.491		-7.42		-2.655		-13.69	-70		-23.902		-14.466		-15.624		-74.773		-14.945		-39.672
	-0.545		-1.631		-4.09		-2.143		-0.31		0.873		-0.36		0.773	-70		-13.796		-3.97		-6.711		-7.325		-6.031		-20.621		-11.535		-7.731		-2.719		-13.877	-70		-24.044		-14.548		-15.813		-74.659		-14.898		-39.998
	-0.538		-1.779		-4.255		-2.1		-0.175		0.932		-0.175		0.598	-70		-13.986		-3.826		-6.783		-7.403		-5.638		-20.469		-11.571		-8.051		-2.738		-14.114	-70		-24.303		-14.69		-15.978		-74.575		-14.815		-40.249
	-0.465		-1.733		-4.321		-2.073		-0.126		1.079		0.002		0.428	-70		-14.242		-3.649		-6.794		-7.337		-5.231		-20.248		-11.609		-8.337		-2.69		-14.353	-70		-24.617		-14.882		-16.076		-74.532		-14.694		-40.354
	-0.347		-1.504		-4.292		-2.073		-0.151		1.259		0.147		0.259	-70		-14.555		-3.42		-6.688		-7.165		-4.877		-20.016		-11.654		-8.554		-2.584		-14.53	-70		-24.912		-15.098		-16.091		-74.531		-14.535		-40.289
	-0.211		-1.125		-4.191		-2.104		-0.197		1.401		0.251		0.086	-70		-14.891		-3.131		-6.461		-6.93		-4.632		-19.842		-11.707		-8.669		-2.456		-14.582	-70		-25.125		-15.299		-16.042		-74.566		-14.34		-40.082
	-0.083		-0.66		-4.05		-2.155		-0.205		1.444		0.322		-0.097	-70		-15.208		-2.803		-6.156		-6.667		-4.511		-19.777		-11.764		-8.668		-2.356		-14.48	-70		-25.223		-15.443		-15.97		-74.638		-14.109		-39.8
	0.028		-0.19		-3.894		-2.214		-0.143		1.359		0.377		-0.288	-70		-15.475		-2.481		-5.848		-6.383		-4.483		-19.842		-11.814		-8.557		-2.324		-14.232	-70		-25.213		-15.501		-15.917		-74.752		-13.846		-39.516
	0.126		0.191		-3.74		-2.263		-0.021		1.164		0.435		-0.477	-70		-15.673		-2.209		-5.606		-6.066		-4.486		-20.016		-11.851		-8.374		-2.373		-13.885	-70		-25.131		-15.475		-15.903		-74.91		-13.561		-39.278
	0.226		0.404		-3.589		-2.289		0.12		0.908		0.51		-0.645	-70		-15.803		-2.018		-5.467		-5.697		-4.456		-20.243		-11.866		-8.178		-2.489		-13.5	-70		-25.029		-15.389		-15.925		-75.1		-13.272		-39.094
	0.344		0.403		-3.437		-2.276		0.238		0.653		0.604		-0.774	-70		-15.878		-1.92		-5.42		-5.276		-4.356		-20.453		-11.855		-8.024		-2.649		-13.131	-70		-24.943		-15.278		-15.955		-75.29		-13.011		-38.928
	0.488		0.191		-3.281		-2.204		0.303		0.452		0.699		-0.857	-70		-15.924		-1.912		-5.426		-4.834		-4.194		-20.58		-11.812		-7.939		-2.837		-12.819	-70		-24.886		-15.175		-15.957		-75.433		-12.814		-38.736
	0.656		-0.18		-3.131		-2.051		0.308		0.334		0.764		-0.909	-70		-15.96		-1.99		-5.44		-4.44		-4.007		-20.587		-11.733		-7.914		-3.049		-12.59	-70		-24.84		-15.1		-15.9		-75.486		-12.708		-38.488
	0.834		-0.625		-3.01		-1.803		0.263		0.303		0.762		-0.961	-70		-15.993		-2.145		-5.434		-4.168		-3.848		-20.477		-11.613		-7.921		-3.277		-12.462	-70		-24.771		-15.059		-15.766		-75.429		-12.693		-38.194
	0.996		-1.05		-2.94		-1.464		0.193		0.337		0.671		-1.043	-70		-16.009		-2.364		-5.413		-4.08		-3.755		-20.29		-11.443		-7.932		-3.493		-12.446	-70		-24.645		-15.043		-15.565		-75.276		-12.74		-37.892
	1.115		-1.37		-2.939		-1.067		0.138		0.4		0.496		-1.168	-70		-15.991		-2.633		-5.404		-4.191		-3.743		-20.091		-11.214		-7.942		-3.65		-12.545	-70		-24.449		-15.034		-15.332		-75.064		-12.796		-37.635
	1.167		-1.527		-3.005		-0.666		0.144		0.443		0.274		-1.313	-70		-15.936		-2.938		-5.444		-4.469		-3.797		-19.94		-10.931		-7.962		-3.698		-12.749	-70		-24.206		-15.009		-15.117		-74.837		-12.811		-37.456
	1.146		-1.489		-3.124		-0.324		0.253		0.418		0.064		-1.433	-70		-15.873		-3.267		-5.556		-4.844		-3.891		-19.87		-10.624		-8.006		-3.609		-13.032	-70		-23.971		-14.954		-14.969		-74.627		-12.759		-37.368
	1.066		-1.26		-3.272		-0.092		0.484		0.3		-0.073		-1.475	-70		-15.849		-3.606		-5.742		-5.233		-3.999		-19.877		-10.353		-8.069		-3.398		-13.359	-70		-23.813		-14.874		-14.923		-74.451		-12.653		-37.361
	0.956		-0.879		-3.425		0.009		0.819		0.1		-0.095		-1.406	-70		-15.906		-3.934		-5.967		-5.566		-4.116		-19.922		-10.187		-8.131		-3.116		-13.695	-70		-23.783		-14.785		-14.983		-74.316		-12.531		-37.416
	0.843		-0.412		-3.559		-0.008		1.21		-0.134		0.008		-1.225	-70		-16.059		-4.222		-6.173		-5.803		-4.256		-19.95		-10.172		-8.163		-2.838		-14.009	-70		-23.892		-14.704		-15.125		-74.226		-12.438		-37.509
	0.749		0.065		-3.663		-0.11		1.594		-0.337		0.209		-0.964	-70		-16.283		-4.434		-6.297		-5.931		-4.438		-19.919		-10.306		-8.151		-2.645		-14.276	-70		-24.109		-14.639		-15.306		-74.188		-12.405		-37.613
	0.68		0.49		-3.734		-0.264		1.913		-0.453		0.458		-0.675	-70		-16.528		-4.54		-6.29		-5.959		-4.677		-19.809		-10.531		-8.106		-2.604		-14.469	-70		-24.381		-14.586		-15.476		-74.202		-12.439		-37.699
	0.637		0.818		-3.78		-0.45		2.133		-0.456		0.689		-0.41	-70		-16.744		-4.527		-6.137		-5.913		-4.975		-19.631		-10.76		-8.067		-2.758		-14.571	-70		-24.65		-14.534		-15.585		-74.248		-12.528		-37.745
	0.616		1.03		-3.808		-0.657		2.239		-0.358		0.85		-0.208	-70		-16.905		-4.399		-5.857		-5.83		-5.321		-19.416		-10.912		-8.081		-3.107		-14.577	-70		-24.868		-14.478		-15.601		-74.284		-12.653		-37.741
	0.605		1.128		-3.823		-0.872		2.229		-0.198		0.91		-0.081	-70		-17.023		-4.178		-5.499		-5.76		-5.702		-19.199		-10.944		-8.181		-3.606		-14.504	-70		-25.001		-14.421		-15.513		-74.248		-12.801		-37.691
	0.586		1.131		-3.824		-1.072		2.099		-0.03		0.875		-0.021	-70		-17.136		-3.893		-5.135		-5.743		-6.11		-19.006		-10.872		-8.374		-4.16		-14.383	-70		-25.039		-14.37		-15.339		-74.084		-12.967		-37.608
	0.541		1.08		-3.81		-1.225		1.846		0.102		0.786		-0.005	-70		-17.282		-3.577		-4.851		-5.795		-6.527		-18.851		-10.756		-8.638		-4.658		-14.249	-70		-24.998		-14.326		-15.131		-73.765		-13.156		-37.505
	0.466		1.029		-3.787		-1.305		1.474		0.171		0.701		-0.013	-70		-17.466		-3.254		-4.725		-5.896		-6.918		-18.736		-10.666		-8.938		-5.006		-14.121	-70		-24.918		-14.277		-14.965		-73.301		-13.379		-37.384
	0.379		1.032		-3.769		-1.303		1.013		0.184		0.669		-0.037	-70		-17.638		-2.951		-4.804		-5.994		-7.219		-18.663		-10.647		-9.236		-5.164		-14.002	-70		-24.855		-14.208		-14.916		-72.734		-13.637		-37.247
	0.31		1.117		-3.768		-1.227		0.52		0.173		0.713		-0.079	-70		-17.711		-2.691		-5.079		-6.032		-7.351		-18.632		-10.7		-9.507		-5.16		-13.882	-70		-24.851		-14.111		-15.027		-72.119		-13.917		-37.096
	0.288		1.267		-3.787		-1.084		0.061		0.178		0.821		-0.143	-70		-17.594		-2.498		-5.487		-5.971		-7.25		-18.635		-10.784		-9.743		-5.068		-13.75	-70		-24.928		-13.994		-15.291		-71.508		-14.179		-36.947
	0.32		1.426		-3.814		-0.88		-0.302		0.226		0.96		-0.228	-70		-17.25		-2.382		-5.944		-5.804		-6.904		-18.653		-10.844		-9.951		-4.966		-13.607	-70		-25.09		-13.883		-15.651		-70.941		-14.368		-36.835
	0.389		1.521		-3.83		-0.619		-0.537		0.317		1.101		-0.319	-70		-16.717		-2.334		-6.372		-5.557		-6.372		-18.656		-10.838		-10.147		-4.903		-13.462	-70		-25.332		-13.812		-16.021		-70.441		-14.428		-36.8
	0.47		1.498		-3.822		-0.324		-0.648		0.425		1.233		-0.391	-70		-16.101		-2.324		-6.731		-5.277		-5.766		-18.611		-10.768		-10.34		-4.887		-13.329	-70		-25.649		-13.812		-16.321		-70.024		-14.334		-36.875
	0.545		1.354		-3.789		-0.041		-0.67		0.52		1.361		-0.413	-70		-15.528		-2.309		-7.012		-5.011		-5.215		-18.499		-10.676		-10.517		-4.901		-13.218	-70		-26.026		-13.895		-16.501		-69.69		-14.108		-37.056
	0.61		1.132		-3.741		0.176		-0.653		0.584		1.506		-0.363	-70		-15.09		-2.264		-7.226		-4.804		-4.82		-18.318		-10.628		-10.644		-4.92		-13.14	-70		-26.432		-14.047		-16.546		-69.433		-13.821		-37.309
	0.666		0.896		-3.683		0.283		-0.637		0.617		1.675		-0.238	-70		-14.817		-2.194		-7.385		-4.686		-4.63		-18.088		-10.685		-10.681		-4.928		-13.101	-70		-26.813		-14.233		-16.47		-69.24		-13.567		-37.573
	0.701		0.699		-3.615		0.265		-0.644		0.631		1.86		-0.059	-70		-14.68		-2.134		-7.497		-4.68		-4.634		-17.843		-10.871		-10.611		-4.909		-13.103	-70		-27.109		-14.404		-16.294		-69.099		-13.429		-37.791
	0.689		0.563		-3.532		0.139		-0.677		0.641		2.029		0.137	-70		-14.617		-2.136		-7.571		-4.796		-4.786		-17.62		-11.16		-10.452		-4.84		-13.139	-70		-27.278		-14.525		-16.041		-69.009		-13.44		-37.921
	0.597		0.47		-3.441		-0.064		-0.736		0.659		2.151		0.305	-70		-14.576		-2.234		-7.619		-5.03		-5.026		-17.449		-11.485		-10.266		-4.692		-13.196	-70		-27.312		-14.594		-15.731		-68.984		-13.579		-37.945
	0.413		0.393		-3.357		-0.319		-0.824		0.693		2.206		0.416	-70		-14.533		-2.422		-7.647		-5.353		-5.299		-17.342		-11.76		-10.123		-4.44		-13.258	-70		-27.241		-14.646		-15.391		-69.04		-13.784		-37.862
	0.158		0.307		-3.303		-0.608		-0.946		0.752		2.202		0.462	-70		-14.497		-2.654		-7.644		-5.723		-5.567		-17.298		-11.916		-10.068		-4.087		-13.317	-70		-27.116		-14.734		-15.058		-69.186		-13.983		-37.69
	-0.111		0.212		-3.288		-0.92		-1.097		0.844		2.161		0.46	-70		-14.496		-2.859		-7.584		-6.089		-5.807		-17.306		-11.922		-10.087		-3.674		-13.371	-70		-26.987		-14.899		-14.765		-69.411		-14.123		-37.461
	-0.324		0.128		-3.3		-1.238		-1.256		0.97		2.106		0.442	-70		-14.557		-2.966		-7.429		-6.406		-5.998		-17.354		-11.798		-10.122		-3.271		-13.424	-70		-26.89		-15.141		-14.535		-69.68		-14.182		-37.217
	-0.427		0.084		-3.31		-1.528		-1.391		1.117		2.044		0.437	-70		-14.688		-2.939		-7.153		-6.648		-6.124		-17.429		-11.592		-10.102		-2.961		-13.477	-70		-26.833		-15.417		-14.369		-69.953		-14.161		-37.008
	-0.4		0.095		-3.292		-1.76		-1.469		1.258		1.963		0.458	-70		-14.875		-2.789		-6.764		-6.801		-6.172		-17.513		-11.357		-9.987		-2.802		-13.529	-70		-26.804		-15.66		-14.257		-70.192		-14.078		-36.88
	-0.258		0.153		-3.233		-1.917		-1.476		1.355		1.85		0.505	-70		-15.074		-2.565		-6.314		-6.855		-6.138		-17.589		-11.126		-9.788		-2.814		-13.575	-70		-26.776		-15.808		-14.18		-70.376		-13.962		-36.856
	-0.04		0.227		-3.148		-2.014		-1.414		1.366		1.7		0.572	-70		-15.229		-2.332		-5.883		-6.792		-6.032		-17.643		-10.9		-9.551		-2.978		-13.612	-70		-26.721		-15.833		-14.126		-70.494		-13.855		-36.935
	0.211		0.289		-3.069		-2.085		-1.302		1.267		1.533		0.652	-70		-15.289		-2.143		-5.556		-6.599		-5.884		-17.669		-10.662		-9.327		-3.244		-13.645	-70		-26.628		-15.746		-14.094		-70.546		-13.797		-37.086
	0.458		0.334		-3.036		-2.163		-1.173		1.051		1.387		0.743	-70		-15.231		-2.023		-5.386		-6.275		-5.74		-17.675		-10.398		-9.149		-3.555		-13.687	-70		-26.513		-15.583		-14.092		-70.537		-13.813		-37.263
	0.674		0.383		-3.077		-2.253		-1.063		0.744		1.305		0.839	-70		-15.078		-1.967		-5.379		-5.846		-5.647		-17.676		-10.12		-9.029		-3.859		-13.755	-70		-26.414		-15.386		-14.125		-70.485		-13.902		-37.425
	0.845		0.458		-3.203		-2.324		-1.005		0.388		1.309		0.929	-70		-14.885		-1.949		-5.496		-5.363		-5.637		-17.683		-9.87		-8.966		-4.113		-13.861	-70		-26.375		-15.178		-14.187		-70.422		-14.034		-37.548
	0.963		0.557		-3.396		-2.332		-1.015		0.038		1.387		1.001	-70		-14.717		-1.939		-5.676		-4.888		-5.715		-17.696		-9.709		-8.95		-4.298		-13.999	-70		-26.417		-14.964		-14.256		-70.393		-14.167		-37.631
	1.027		0.641		-3.611		-2.245		-1.087		-0.257		1.493		1.044	-70		-14.621		-1.914		-5.871		-4.471		-5.863		-17.712		-9.694		-8.965		-4.418		-14.148	-70		-26.525		-14.74		-14.301		-70.434		-14.264		-37.687
	1.034		0.658		-3.794		-2.067		-1.187		-0.462		1.562		1.05	-70		-14.614		-1.865		-6.069		-4.15		-6.051		-17.733		-9.841		-8.992		-4.504		-14.272	-70		-26.647		-14.511		-14.304		-70.558		-14.308		-37.729
	0.984		0.578		-3.895		-1.832		-1.272		-0.564		1.54		1.017	-70		-14.687		-1.805		-6.283		-3.947		-6.249		-17.769		-10.12		-9.003		-4.601		-14.336	-70		-26.719		-14.307		-14.268		-70.74		-14.299		-37.764
	0.871		0.414		-3.887		-1.587		-1.306		-0.571		1.406		0.946	-70		-14.811		-1.76		-6.532		-3.867		-6.435		-17.829		-10.456		-8.965		-4.752		-14.325	-70		-26.689		-14.172		-14.217		-70.927		-14.244		-37.791
	0.696		0.219		-3.78		-1.373		-1.278		-0.514		1.172		0.842	-70		-14.953		-1.76		-6.81		-3.901		-6.591		-17.906		-10.763		-8.851		-4.98		-14.25	-70		-26.537		-14.146		-14.171		-71.062		-14.144		-37.796
	0.466		0.044		-3.608		-1.219		-1.202		-0.433		0.879		0.714	-70		-15.081		-1.822		-7.08		-4.029		-6.692		-17.972		-10.973		-8.651		-5.278		-14.145	-70		-26.266		-14.249		-14.131		-71.104		-13.994		-37.763
	0.198		-0.09		-3.422		-1.146		-1.102		-0.368		0.57		0.574	-70		-15.173		-1.94		-7.286		-4.229		-6.711		-17.984		-11.056		-8.378		-5.615		-14.058	-70		-25.899		-14.466		-14.071		-71.044		-13.798		-37.675
	-0.081		-0.198		-3.268		-1.168		-0.994		-0.343		0.278		0.43	-70		-15.22		-2.082		-7.382		-4.489		-6.629		-17.91		-11.02		-8.072		-5.951		-14.035	-70		-25.475		-14.756		-13.957		-70.903		-13.581		-37.525
	-0.342		-0.313		-3.176		-1.289		-0.878		-0.368		0.026		0.292	-70		-15.235		-2.205		-7.353		-4.804		-6.44		-17.746		-10.896		-7.787		-6.237		-14.104	-70		-25.049		-15.066		-13.771		-70.719		-13.398		-37.327
	-0.563		-0.46		-3.159		-1.492		-0.741		-0.434		-0.164		0.165	-70		-15.248		-2.276		-7.22		-5.169		-6.168		-17.522		-10.724		-7.571		-6.423		-14.274	-70		-24.689		-15.345		-13.534		-70.538		-13.305		-37.111
	-0.73		-0.647		-3.217		-1.733		-0.579		-0.522		-0.264		0.06	-70		-15.291		-2.291		-7.033		-5.564		-5.852		-17.291		-10.542		-7.456		-6.469		-14.527	-70		-24.454		-15.56		-13.301		-70.395		-13.336		-36.916
	-0.831		-0.86		-3.347		-1.953		-0.397		-0.609		-0.25		-0.015	-70		-15.381		-2.278		-6.846		-5.946		-5.534		-17.11		-10.389		-7.45		-6.358		-14.821	-70		-24.375		-15.705		-13.143		-70.307		-13.476		-36.781
	-0.846		-1.075		-3.541		-2.097		-0.212		-0.672		-0.113		-0.052	-70		-15.506		-2.29		-6.698		-6.274		-5.243		-17.024		-10.296		-7.545		-6.113		-15.098	-70		-24.44		-15.805		-13.118		-70.273		-13.67		-36.732
	-0.748		-1.266		-3.776		-2.135		-0.037		-0.694		0.118		-0.055	-70		-15.629		-2.378		-6.61		-6.525		-4.983		-17.049		-10.289		-7.717		-5.798		-15.307	-70		-24.604		-15.894		-13.251		-70.277		-13.843		-36.779
	-0.515		-1.401		-4.011		-2.068		0.124		-0.667		0.383		-0.033	-70		-15.71		-2.576		-6.583		-6.707		-4.735		-17.172		-10.368		-7.934		-5.497		-15.418	-70		-24.806		-15.997		-13.527		-70.295		-13.935		-36.921
	-0.148		-1.453		-4.185		-1.927		0.268		-0.595		0.612		-0.002	-70		-15.721		-2.876		-6.603		-6.852		-4.477		-17.353		-10.504		-8.159		-5.287		-15.439	-70		-24.995		-16.098		-13.897		-70.296		-13.913		-37.141
	0.31		-1.405		-4.234		-1.753		0.392		-0.494		0.752		0.015	-70		-15.656		-3.23		-6.649		-6.995		-4.2		-17.536		-10.645		-8.355		-5.211		-15.408	-70		-25.137		-16.145		-14.308		-70.257		-13.772		-37.402
	0.794		-1.261		-4.117		-1.582		0.482		-0.383		0.788		-0.004	-70		-15.53		-3.566		-6.697		-7.145		-3.926		-17.666		-10.731		-8.493		-5.268		-15.371	-70		-25.217		-16.065		-14.723		-70.168		-13.535		-37.645
	1.234		-1.044		-3.833		-1.438		0.521		-0.281		0.743		-0.081	-70		-15.368		-3.813		-6.721		-7.289		-3.696		-17.703		-10.723		-8.56		-5.416		-15.358	-70		-25.236		-15.807		-15.135		-70.043		-13.241		-37.804
	1.588		-0.789		-3.423		-1.334		0.506		-0.205		0.655		-0.229	-70		-15.201		-3.93		-6.698		-7.397		-3.557		-17.636		-10.616		-8.566		-5.59		-15.37	-70		-25.209		-15.37		-15.556		-69.911		-12.938		-37.829
	1.847		-0.528		-2.962		-1.27		0.453		-0.157		0.559		-0.455	-70		-15.064		-3.922		-6.613		-7.441		-3.537		-17.49		-10.441		-8.531		-5.726		-15.384	-70		-25.161		-14.819		-15.989		-69.813		-12.671		-37.71
	2.029		-0.278		-2.525		-1.244		0.397		-0.125		0.478		-0.76	-70		-14.985		-3.835		-6.466		-7.404		-3.635		-17.32		-10.25		-8.474		-5.776		-15.371	-70		-25.126		-14.272		-16.412		-69.777		-12.467		-37.487
	2.147		-0.039		-2.174		-1.251		0.372		-0.075		0.432		-1.133	-70		-14.985		-3.737		-6.273		-7.289		-3.828		-17.198		-10.084		-8.403		-5.727		-15.319	-70		-25.134		-13.857		-16.774		-69.807		-12.339		-37.226
	2.207		0.198		-1.936		-1.274		0.398		0.04		0.439		-1.54	-70		-15.064		-3.687		-6.065		-7.112		-4.08		-17.179		-9.964		-8.306		-5.594		-15.239	-70		-25.202		-13.67		-17.013		-69.87		-12.289		-36.994
	2.21		0.437		-1.805		-1.291		0.469		0.25		0.515		-1.924	-70		-15.2		-3.716		-5.882		-6.897		-4.355		-17.289		-9.881		-8.167		-5.407		-15.164	-70		-25.332		-13.743		-17.083		-69.913		-12.317		-36.83
	2.167		0.67		-1.753		-1.277		0.562		0.553		0.659		-2.207	-70		-15.356		-3.815		-5.759		-6.677		-4.62		-17.511		-9.811		-7.979		-5.204		-15.134	-70		-25.504		-14.036		-16.979		-69.883		-12.417		-36.743
	2.1		0.874		-1.741		-1.224		0.645		0.896		0.84		-2.322	-70		-15.493		-3.947		-5.717		-6.482		-4.845		-17.797		-9.735		-7.758		-5.018		-15.172	-70		-25.674		-14.459		-16.748		-69.758		-12.573		-36.725
	2.034		1.013		-1.75		-1.141		0.693		1.2		1.005		-2.242	-70		-15.581		-4.068		-5.762		-6.335		-5.01		-18.089		-9.644		-7.54		-4.881		-15.269	-70		-25.781		-14.911		-16.475		-69.558		-12.753		-36.767
	1.979		1.047		-1.788		-1.056		0.689		1.39		1.094		-1.993	-70		-15.614		-4.149		-5.888		-6.246		-5.102		-18.34		-9.546		-7.359		-4.815		-15.383	-70		-25.765		-15.31		-16.259		-69.334		-12.922		-36.868
	1.93		0.954		-1.889		-0.996		0.633		1.435		1.069		-1.634	-70		-15.607		-4.182		-6.075		-6.209		-5.125		-18.529		-9.455		-7.232		-4.831		-15.461	-70		-25.589		-15.615		-16.176		-69.138		-13.057		-37.029
	1.873		0.744		-2.086		-0.971		0.54		1.353		0.931		-1.228	-70		-15.581		-4.178		-6.294		-6.208		-5.102		-18.652		-9.381		-7.15		-4.916		-15.462	-70		-25.259		-15.826		-16.255		-68.995		-13.157		-37.245
	1.796		0.468		-2.39		-0.969		0.432		1.203		0.713		-0.821	-70		-15.548		-4.153		-6.508		-6.227		-5.062		-18.721		-9.333		-7.094		-5.034		-15.379	-70		-24.833		-15.972		-16.465		-68.894		-13.244		-37.495
	1.695		0.196		-2.768		-0.952		0.322		1.048		0.466		-0.438	-70		-15.504		-4.114		-6.67		-6.257		-5.031		-18.747		-9.319		-7.047		-5.134		-15.23	-70		-24.396		-16.092		-16.74		-68.798		-13.346		-37.748
	1.575		-0.008		-3.153		-0.88		0.209		0.942		0.237		-0.1	-70		-15.437		-4.055		-6.739		-6.304		-5.018		-18.735		-9.346		-7.016		-5.159		-15.051	-70		-24.035		-16.209		-17.01		-68.665		-13.472		-37.97
	1.442		-0.11		-3.466		-0.718		0.08		0.921		0.061		0.161	-70		-15.33		-3.958		-6.684		-6.379		-5.016		-18.688		-9.416		-7.02		-5.071		-14.88	-70		-23.813		-16.321		-17.225		-68.473		-13.599		-38.134
	1.303		-0.115		-3.652		-0.461		-0.082		0.999		-0.042		0.307	-70		-15.167		-3.803		-6.492		-6.488		-5.009		-18.621		-9.518		-7.081		-4.869		-14.743	-70		-23.757		-16.401		-17.376		-68.231		-13.675		-38.215
	1.17		-0.049		-3.692		-0.138		-0.288		1.174		-0.058		0.314	-70		-14.942		-3.581		-6.178		-6.618		-4.984		-18.568		-9.624		-7.198		-4.59		-14.647	-70		-23.863		-16.411		-17.476		-67.973		-13.649		-38.195
	1.051		0.064		-3.609		0.195		-0.535		1.414		0.022		0.183	-70		-14.656		-3.297		-5.779		-6.741		-4.95		-18.566		-9.699		-7.348		-4.303		-14.581	-70		-24.099		-16.317		-17.551		-67.74		-13.507		-38.052
	0.947		0.213		-3.45		0.471		-0.809		1.672		0.198		-0.047	-70		-14.332		-2.983		-5.353		-6.824		-4.934		-18.645		-9.713		-7.492		-4.086		-14.516	-70		-24.422		-16.113		-17.617		-67.555		-13.287		-37.777
	0.848		0.396		-3.263		0.627		-1.091		1.901		0.462		-0.315	-70		-14.016		-2.685		-4.955		-6.853		-4.968		-18.803		-9.663		-7.599		-3.986		-14.426	-70		-24.789		-15.822		-17.676		-67.414		-13.068		-37.388
	0.744		0.607		-3.084		0.625		-1.359		2.078		0.79		-0.555	-70		-13.766		-2.452		-4.631		-6.841		-5.068		-19.011		-9.571		-7.649		-4.006		-14.301	-70		-25.16		-15.491		-17.72		-67.301		-12.934		-36.934
	0.631		0.815		-2.938		0.469		-1.592		2.211		1.14		-0.724	-70		-13.646		-2.31		-4.394		-6.813		-5.222		-19.229		-9.482		-7.641		-4.104		-14.165	-70		-25.503		-15.175		-17.73		-67.2		-12.936		-36.491
	0.523		0.976		-2.841		0.205		-1.778		2.328		1.465		-0.805	-70		-13.696		-2.251		-4.235		-6.791		-5.396		-19.422		-9.439		-7.584		-4.223		-14.069	-70		-25.792		-14.922		-17.687		-67.111		-13.071		-36.135
	0.444		1.042		-2.816		-0.084		-1.915		2.452		1.724		-0.81	-70		-13.924		-2.238		-4.126		-6.773		-5.546		-19.573		-9.47		-7.497		-4.322		-14.064	-70		-26.001		-14.756		-17.569		-67.045		-13.288		-35.921
	0.414		0.988		-2.883		-0.306		-2.015		2.577		1.895		-0.768	-70		-14.289		-2.232		-4.043		-6.731		-5.639		-19.679		-9.573		-7.404		-4.397		-14.182	-70		-26.116		-14.679		-17.348		-67.015		-13.516		-35.862
	0.427		0.826		-3.05		-0.397		-2.089		2.66		1.98		-0.713	-70		-14.716		-2.213		-3.98		-6.621		-5.654		-19.738		-9.721		-7.318		-4.472		-14.419	-70		-26.137		-14.67		-17.006		-67.03		-13.688		-35.929
	0.447		0.604		-3.3		-0.345		-2.141		2.642		1.994		-0.674	-70		-15.114		-2.19		-3.952		-6.409		-5.578		-19.746		-9.878		-7.238		-4.577		-14.736	-70		-26.083		-14.698		-16.542		-67.088		-13.764		-36.058
	0.427		0.389		-3.585		-0.192		-2.16		2.478		1.953		-0.662	-70		-15.402		-2.19		-3.983		-6.083		-5.407		-19.7		-10.015		-7.145		-4.724		-15.079	-70		-25.983		-14.725		-15.986		-67.184		-13.735		-36.176
	0.332		0.238		-3.841		-0.018		-2.135		2.165		1.859		-0.675	-70		-15.532		-2.235		-4.084		-5.672		-5.143		-19.603		-10.114		-7.006		-4.902		-15.4	-70		-25.863		-14.723		-15.398		-67.307		-13.621		-36.218
	0.16		0.18		-4.014		0.099		-2.064		1.75		1.712		-0.702	-70		-15.497		-2.334		-4.246		-5.244		-4.803		-19.466		-10.178		-6.796		-5.091		-15.669	-70		-25.746		-14.676		-14.846		-67.441		-13.456		-36.151
	-0.056		0.205		-4.077		0.102		-1.96		1.308		1.517		-0.731	-70		-15.331		-2.483		-4.439		-4.88		-4.416		-19.3		-10.216		-6.512		-5.27		-15.872	-70		-25.647		-14.586		-14.389		-67.568		-13.278		-35.977
	-0.262		0.284		-4.032		-0.027		-1.848		0.914		1.296		-0.762	-70		-15.087		-2.668		-4.632		-4.64		-4.016		-19.12		-10.237		-6.178		-5.427		-16.007	-70		-25.58		-14.463		-14.055		-67.669		-13.116		-35.736
	-0.398		0.383		-3.903		-0.265		-1.75		0.621		1.08		-0.795	-70		-14.829		-2.872		-4.805		-4.538		-3.64		-18.941		-10.244		-5.841		-5.545		-16.072	-70		-25.562		-14.325		-13.841		-67.731		-12.993		-35.49
	-0.413		0.481		-3.717		-0.563		-1.675		0.448		0.895		-0.832	-70		-14.618		-3.079		-4.959		-4.533		-3.321		-18.782		-10.235		-5.555		-5.609		-16.062	-70		-25.604		-14.19		-13.715		-67.747		-12.925		-35.296
	-0.275		0.571		-3.505		-0.857		-1.622		0.384		0.753		-0.861	-70		-14.504		-3.273		-5.104		-4.561		-3.078		-18.666		-10.21		-5.364		-5.6		-15.97	-70		-25.714		-14.078		-13.639		-67.716		-12.918		-35.194
	0.016		0.659		-3.303		-1.095		-1.579		0.397		0.661		-0.868	-70		-14.517		-3.441		-5.252		-4.569		-2.915		-18.611		-10.173		-5.292		-5.514		-15.799	-70		-25.892		-14.009		-13.579		-67.644		-12.968		-35.191
	0.418		0.754		-3.156		-1.244		-1.535		0.444		0.622		-0.844	-70		-14.656		-3.577		-5.406		-4.547		-2.819		-18.622		-10.135		-5.332		-5.372		-15.567	-70		-26.123		-13.996		-13.526		-67.543		-13.053		-35.264
	0.851		0.87		-3.108		-1.299		-1.479		0.482		0.641		-0.789	-70		-14.885		-3.677		-5.561		-4.521		-2.772		-18.686		-10.111		-5.453		-5.217		-15.311	-70		-26.386		-14.041		-13.499		-67.428		-13.138		-35.372
	1.216		1.016		-3.194		-1.272		-1.403		0.48		0.717		-0.713	-70		-15.136		-3.742		-5.712		-4.524		-2.765		-18.774		-10.118		-5.605		-5.094		-15.079	-70		-26.647		-14.139		-13.53		-67.315		-13.184		-35.475
	1.435		1.186		-3.427		-1.184		-1.307		0.435		0.835		-0.625	-70		-15.33		-3.772		-5.861		-4.57		-2.802		-18.854		-10.163		-5.737		-5.034		-14.913	-70		-26.87		-14.276		-13.637		-67.214		-13.173		-35.551
	1.472		1.354		-3.787		-1.05		-1.195		0.364		0.966		-0.526	-70		-15.401		-3.77		-6.012		-4.639		-2.904		-18.901		-10.243		-5.815		-5.04		-14.83	-70		-27.025		-14.436		-13.804		-67.129		-13.111		-35.6
	1.352		1.48		-4.228		-0.886		-1.077		0.294		1.073		-0.409	-70		-15.32		-3.74		-6.161		-4.7		-3.089		-18.904		-10.328		-5.833		-5.094		-14.814	-70		-27.101		-14.606		-13.982		-67.063		-13.033		-35.644
	1.141		1.524		-4.686		-0.708		-0.96		0.247		1.125		-0.272	-70		-15.111		-3.689		-6.29		-4.739		-3.362		-18.862		-10.373		-5.809		-5.169		-14.829	-70		-27.113		-14.773		-14.102		-67.033		-12.987		-35.709
	0.917		1.465		-5.098		-0.535		-0.847		0.227		1.107		-0.122	-70		-14.847		-3.619		-6.37		-4.779		-3.7		-18.783		-10.323		-5.772		-5.241		-14.833	-70		-27.088		-14.915		-14.115		-67.071		-13.016		-35.811
	0.738		1.307		-5.419		-0.394		-0.742		0.216		1.027		0.02	-70		-14.616		-3.528		-6.366		-4.866		-4.055		-18.681		-10.149		-5.751		-5.295		-14.796	-70		-27.052		-15.001		-14.011		-67.209		-13.133		-35.936
	0.627		1.072		-5.629		-0.315		-0.653		0.185		0.915		0.133	-70		-14.487		-3.411		-6.256		-5.045		-4.366		-18.573		-9.866		-5.762		-5.32		-14.713	-70		-27.024		-14.994		-13.832		-67.464		-13.315		-36.052
	0.567		0.791		-5.731		-0.322		-0.587		0.104		0.814		0.199	-70		-14.483		-3.266		-6.033		-5.318		-4.583		-18.482		-9.535		-5.799		-5.314		-14.598	-70		-27.016		-14.866		-13.653		-67.821		-13.503		-36.117
	0.51		0.488		-5.735		-0.414		-0.536		-0.037		0.766		0.22	-70		-14.568		-3.098		-5.713		-5.632		-4.679		-18.428		-9.24		-5.846		-5.283		-14.483	-70		-27.036		-14.623		-13.553		-68.241		-13.621		-36.11
	0.406		0.178		-5.66		-0.56		-0.471		-0.219		0.794		0.197	-70		-14.676		-2.915		-5.332		-5.893		-4.667		-18.429		-9.052		-5.884		-5.239		-14.398	-70		-27.085		-14.307		-13.582		-68.675		-13.608		-36.037
	0.231		-0.126		-5.518		-0.705		-0.342		-0.401		0.896		0.13	-70		-14.75		-2.729		-4.938		-6.008		-4.584		-18.501		-9.003		-5.908		-5.197		-14.359	-70		-27.151		-13.99		-13.743		-69.083		-13.44		-35.926
	0.005		-0.41		-5.325		-0.792		-0.102		-0.532		1.044		0.003	-70		-14.764		-2.547		-4.573		-5.928		-4.473		-18.653		-9.081		-5.928		-5.166		-14.358	-70		-27.207		-13.75		-13.994		-69.44		-13.142		-35.817
	-0.212		-0.649		-5.091		-0.793		0.268		-0.572		1.202		-0.202	-70		-14.738		-2.371		-4.263		-5.674		-4.372		-18.879		-9.252		-5.963		-5.141		-14.368	-70		-27.217		-13.641		-14.27		-69.732		-12.783		-35.74
	-0.344		-0.818		-4.819		-0.722		0.73		-0.502		1.339		-0.487	-70		-14.712		-2.2		-4.02		-5.323		-4.298		-19.159		-9.477		-6.033		-5.116		-14.353	-70		-27.155		-13.674		-14.513		-69.945		-12.45		-35.709
	-0.341		-0.888		-4.5		-0.618		1.204		-0.327		1.441		-0.828	-70		-14.721		-2.043		-3.848		-4.974		-4.256		-19.457		-9.72		-6.154		-5.082		-14.296	-70		-27.014		-13.818		-14.688		-70.058		-12.226		-35.726
	-0.197		-0.847		-4.129		-0.52		1.596		-0.07		1.515		-1.176	-70		-14.772		-1.918		-3.758		-4.704		-4.24		-19.729		-9.954		-6.335		-5.039		-14.202	-70		-26.82		-14.022		-14.793		-70.051		-12.164		-35.778
	0.051		-0.706		-3.717		-0.439		1.843		0.239		1.576		-1.468	-70		-14.845		-1.859		-3.756		-4.543		-4.242		-19.93		-10.152		-6.575		-4.99		-14.092	-70		-26.619		-14.235		-14.852		-69.921		-12.285		-35.843
	0.335		-0.509		-3.301		-0.362		1.936		0.564		1.641		-1.659	-70		-14.908		-1.896		-3.829		-4.476		-4.25		-20.029		-10.284		-6.863		-4.947		-13.991	-70		-26.461		-14.421		-14.891		-69.703		-12.567		-35.894
	0.583		-0.319		-2.939		-0.262		1.913		0.876		1.716		-1.724	-70		-14.943		-2.045		-3.93		-4.47		-4.244		-20.007		-10.328		-7.18		-4.921		-13.911	-70		-26.382		-14.559		-14.935		-69.459		-12.958		-35.91
	0.733		-0.207		-2.685		-0.125		1.833		1.147		1.788		-1.672	-70		-14.955		-2.291		-3.991		-4.498		-4.203		-19.869		-10.278		-7.498		-4.918		-13.86	-70		-26.392		-14.635		-14.986		-69.254		-13.383		-35.88
	0.744		-0.223		-2.571		0.043		1.743		1.356		1.832		-1.532	-70		-14.967		-2.588		-3.956		-4.542		-4.112		-19.645		-10.15		-7.8		-4.942		-13.846	-70		-26.47		-14.64		-15.036		-69.124		-13.76		-35.815
	0.609		-0.38		-2.603		0.217		1.654		1.486		1.82		-1.352	-70		-15.001		-2.871		-3.813		-4.591		-3.973		-19.383		-9.979		-8.074		-4.983		-13.871	-70		-26.567		-14.571		-15.067		-69.065		-14.019		-35.735
	0.368		-0.65		-2.766		0.364		1.553		1.542		1.74		-1.186	-70		-15.062		-3.081		-3.602		-4.628		-3.801		-19.138		-9.805		-8.315		-5.026		-13.924	-70		-26.621		-14.438		-15.071		-69.043		-14.122		-35.663
	0.107		-0.977		-3.029		0.459		1.408		1.548		1.606		-1.077	-70		-15.144		-3.181		-3.4		-4.63		-3.621		-18.952		-9.661		-8.51		-5.04		-13.977	-70		-26.578		-14.268		-15.059		-69.021		-14.075		-35.619
	-0.071		-1.299		-3.358		0.496		1.192		1.547		1.455		-1.046	-70		-15.233		-3.178		-3.282		-4.574		-3.464		-18.847		-9.569		-8.639		-4.994		-13.994	-70		-26.411		-14.097		-15.064		-68.981		-13.922		-35.616
	-0.085		-1.563		-3.716		0.487		0.886		1.586		1.328		-1.083	-70		-15.319		-3.12		-3.296		-4.453		-3.362		-18.815		-9.533		-8.682		-4.86		-13.959	-70		-26.137		-13.965		-15.124		-68.916		-13.729		-35.661
	0.08		-1.734		-4.075		0.456		0.49		1.684		1.247		-1.157	-70		-15.392		-3.072		-3.457		-4.279		-3.347		-18.824		-9.542		-8.627		-4.636		-13.89	-70		-25.811		-13.905		-15.261		-68.825		-13.562		-35.753
	0.37		-1.79		-4.412		0.432		0.022		1.827		1.214		-1.234	-70		-15.441		-3.089		-3.742		-4.082		-3.442		-18.826		-9.572		-8.485		-4.354		-13.837	-70		-25.502		-13.941		-15.461		-68.694		-13.461		-35.884
	0.689		-1.728		-4.714		0.431		-0.478		1.966		1.212		-1.289	-70		-15.447		-3.201		-4.107		-3.9		-3.653		-18.773		-9.596		-8.285		-4.078		-13.852	-70		-25.265		-14.075		-15.671		-68.5		-13.438		-36.029
	0.956		-1.558		-4.972		0.463		-0.951		2.045		1.22		-1.313	-70		-15.393		-3.402		-4.5		-3.763		-3.96		-18.632		-9.591		-8.066		-3.892		-13.958	-70		-25.128		-14.288		-15.821		-68.228		-13.478		-36.158
	1.136		-1.312		-5.175		0.529		-1.332		2.026		1.218		-1.297	-70		-15.276		-3.664		-4.87		-3.688		-4.32		-18.405		-9.552		-7.873		-3.859		-14.136	-70		-25.087		-14.538		-15.858		-67.883		-13.558		-36.236
	1.249		-1.038		-5.309		0.63		-1.576		1.906		1.191		-1.238	-70		-15.113		-3.949		-5.185		-3.678		-4.686		-18.127		-9.485		-7.745		-4.004		-14.337	-70		-25.122		-14.773		-15.771		-67.499		-13.661		-36.239
	1.331		-0.792		-5.349		0.766		-1.672		1.716		1.123		-1.128	-70		-14.937		-4.212		-5.429		-3.727		-5.018		-17.861		-9.406		-7.703		-4.293		-14.517	-70		-25.206		-14.941		-15.602		-67.13		-13.786		-36.157
	1.406		-0.614		-5.263		0.933		-1.648		1.508		1		-0.97	-70		-14.78		-4.412		-5.603		-3.821		-5.291		-17.665		-9.324		-7.751		-4.655		-14.654	-70		-25.313		-15.012		-15.429		-66.837		-13.936		-35.994
	1.465		-0.509		-5.024		1.117		-1.556		1.33		0.813		-0.78	-70		-14.661		-4.516		-5.716		-3.948		-5.483		-17.572		-9.239		-7.865		-5.006		-14.754	-70		-25.42		-14.969		-15.336		-66.662		-14.109		-35.757
	1.481		-0.452		-4.629		1.296		-1.439		1.223		0.57		-0.591	-70		-14.589		-4.512		-5.778		-4.086		-5.572		-17.578		-9.146		-8.007		-5.277		-14.834	-70		-25.509		-14.815		-15.378		-66.621		-14.283		-35.462
	1.441		-0.401		-4.116		1.449		-1.31		1.212		0.302		-0.447	-70		-14.567		-4.412		-5.796		-4.214		-5.535		-17.65		-9.043		-8.135		-5.432		-14.907	-70		-25.57		-14.56		-15.559		-66.702		-14.421		-35.131
	1.36		-0.322		-3.562		1.562		-1.149		1.302		0.058		-0.381	-70		-14.597		-4.241		-5.778		-4.31		-5.363		-17.749		-8.933		-8.218		-5.464		-14.966	-70		-25.601		-14.22		-15.829		-66.866		-14.492		-34.804
	1.276		-0.211		-3.07		1.625		-0.925		1.477		-0.107		-0.403	-70		-14.675		-4.032		-5.731		-4.366		-5.069		-17.841		-8.836		-8.249		-5.378		-14.991	-70		-25.616		-13.82		-16.106		-67.066		-14.481		-34.528
	1.229		-0.09		-2.731		1.635		-0.632		1.701		-0.156		-0.491	-70		-14.784		-3.807		-5.663		-4.397		-4.694		-17.912		-8.779		-8.238		-5.188		-14.959	-70		-25.632		-13.397		-16.314		-67.256		-14.404		-34.344
	1.24		0.006		-2.595		1.592		-0.306		1.933		-0.09		-0.597	-70		-14.898		-3.588		-5.577		-4.437		-4.285		-17.965		-8.789		-8.209		-4.906		-14.849	-70		-25.667		-13.001		-16.413		-67.406		-14.294		-34.261
	1.309		0.04		-2.654		1.505		-0.017		2.137		0.053		-0.667	-70		-14.991		-3.389		-5.471		-4.525		-3.884		-18.01		-8.876		-8.186		-4.559		-14.658	-70		-25.724		-12.687		-16.403		-67.503		-14.183		-34.254
	1.418		-0.006		-2.842		1.396		0.152		2.293		0.213		-0.661	-70		-15.056		-3.226		-5.341		-4.677		-3.507		-18.056		-9.031		-8.175		-4.189		-14.398	-70		-25.783		-12.505		-16.312		-67.549		-14.093		-34.278
	1.549		-0.129		-3.065		1.296		0.147		2.398		0.338		-0.573	-70		-15.1		-3.108		-5.191		-4.872		-3.157		-18.105		-9.221		-8.168		-3.857		-14.096	-70		-25.808		-12.48		-16.178		-67.545		-14.039		-34.29
	1.682		-0.3		-3.233		1.23		-0.044		2.465		0.412		-0.429	-70		-15.146		-3.031		-5.038		-5.057		-2.827		-18.151		-9.404		-8.145		-3.622		-13.794	-70		-25.77		-12.605		-16.033		-67.488		-14.032		-34.276
	1.801		-0.468		-3.301		1.207		-0.38		2.523		0.45		-0.279	-70		-15.209		-2.984		-4.906		-5.176		-2.52		-18.189		-9.541		-8.089		-3.525		-13.534	-70		-25.664		-12.841		-15.902		-67.373		-14.083		-34.242
	1.889		-0.579		-3.286		1.213		-0.787		2.603		0.484		-0.177	-70		-15.297		-2.949		-4.814		-5.197		-2.252		-18.223		-9.613		-8.002		-3.561		-13.353	-70		-25.525		-13.137		-15.796		-67.205		-14.198		-34.208
	1.934		-0.593		-3.254		1.227		-1.176		2.725		0.54		-0.149	-70		-15.398		-2.915		-4.767		-5.126		-2.042		-18.261		-9.625		-7.91		-3.695		-13.274	-70		-25.406		-13.448		-15.706		-67.008		-14.369		-34.185
	1.94		-0.498		-3.29		1.231		-1.473		2.882		0.621		-0.186	-70		-15.495		-2.873		-4.759		-4.996		-1.906		-18.313		-9.605		-7.849		-3.872		-13.3	-70		-25.364		-13.753		-15.606		-66.817		-14.571		-34.169
	1.933		-0.315		-3.449		1.224		-1.63		3.041		0.715		-0.246	-70		-15.567		-2.826		-4.778		-4.85		-1.846		-18.383		-9.59		-7.847		-4.054		-13.415	-70		-25.43		-14.051		-15.465		-66.665		-14.766		-34.148
	1.954		-0.089		-3.738		1.218		-1.63		3.156		0.811		-0.265	-70		-15.594		-2.772		-4.814		-4.729		-1.847		-18.468		-9.609		-7.908		-4.229		-13.588	-70		-25.606		-14.345		-15.262		-66.561		-14.914		-34.115
	2.04		0.123		-4.11		1.227		-1.493		3.194		0.906		-0.19	-70		-15.561		-2.709		-4.855		-4.671		-1.884		-18.561		-9.672		-8		-4.406		-13.778	-70		-25.869		-14.624		-15.003		-66.486		-14.99		-34.071
	2.202		0.272		-4.491		1.254		-1.264		3.153		1.01		0.005	-70		-15.461		-2.624		-4.889		-4.707		-1.934		-18.655		-9.778		-8.068		-4.591		-13.943	-70		-26.174		-14.857		-14.724		-66.404		-14.981		-34.019
	2.417		0.322		-4.81		1.283		-1.01		3.057		1.136		0.302	-70		-15.299		-2.505		-4.908		-4.856		-1.984		-18.737		-9.915		-8.054		-4.777		-14.05	-70		-26.466		-15.002		-14.479		-66.287		-14.889		-33.964
	2.633		0.262		-5.021		1.287		-0.797		2.934		1.287		0.646	-70		-15.095		-2.35		-4.916		-5.108		-2.032		-18.796		-10.066		-7.929		-4.937		-14.075	-70		-26.69		-15.024		-14.327		-66.127		-14.726		-33.899
	2.792		0.095		-5.107		1.246		-0.668		2.793		1.463		0.962	-70		-14.882		-2.174		-4.926		-5.423		-2.078		-18.824		-10.201		-7.712		-5.051		-14.014	-70		-26.804		-14.908		-14.312		-65.942		-14.51		-33.812
	2.849		-0.162		-5.064		1.16		-0.628		2.627		1.653		1.179	-70		-14.687		-2.007		-4.952		-5.745		-2.123		-18.825		-10.271		-7.473		-5.115		-13.886	-70		-26.798		-14.671		-14.44		-65.76		-14.26		-33.691
	2.785		-0.476		-4.892		1.049		-0.646		2.426		1.842		1.259	-70		-14.522		-1.882		-4.996		-6.019		-2.159		-18.813		-10.222		-7.304		-5.153		-13.733	-70		-26.693		-14.352		-14.678		-65.607		-13.987		-33.534
	2.609		-0.805		-4.6		0.943		-0.67		2.198		2.01		1.206	-70		-14.378		-1.827		-5.042		-6.211		-2.182		-18.801		-10.023		-7.273		-5.194		-13.609	-70		-26.53		-14		-14.959		-65.497		-13.69		-33.358
	2.359		-1.102		-4.212		0.859		-0.658		1.975		2.142		1.065	-70		-14.233		-1.862		-5.068		-6.312		-2.193		-18.789		-9.694		-7.39		-5.263		-13.566	-70		-26.351		-13.655		-15.21		-65.44		-13.372		-33.201
	2.097		-1.325		-3.785		0.8		-0.588		1.792		2.233		0.894	-70		-14.074		-2.006		-5.067		-6.334		-2.204		-18.766		-9.308		-7.598		-5.364		-13.633	-70		-26.178		-13.338		-15.381		-65.442		-13.053		-33.104
	1.892		-1.451		-3.396		0.756		-0.463		1.667		2.294		0.751	-70		-13.909		-2.273		-5.051		-6.298		-2.226		-18.72		-8.964		-7.803		-5.492		-13.798	-70		-26.009		-13.054		-15.461		-65.506		-12.775		-33.099
	1.802		-1.474		-3.122		0.718		-0.303		1.589		2.338		0.675	-70		-13.761		-2.666		-5.051		-6.231		-2.261		-18.648		-8.754		-7.918		-5.643		-14.02	-70		-25.829		-12.799		-15.464		-65.625		-12.589		-33.195
	1.846		-1.41		-3.015		0.683		-0.134		1.525		2.372		0.683	-70		-13.658		-3.163		-5.095		-6.159		-2.301		-18.561		-8.731		-7.899		-5.817		-14.244	-70		-25.623		-12.573		-15.414		-65.774		-12.523		-33.379
	2.001		-1.279		-3.078		0.646		0.018		1.438		2.384		0.772	-70		-13.618		-3.712		-5.195		-6.104		-2.331		-18.477		-8.899		-7.749		-6.008		-14.429	-70		-25.386		-12.387		-15.328		-65.922		-12.564		-33.62
	2.203		-1.108		-3.259		0.604		0.138		1.308		2.349		0.922	-70		-13.645		-4.241		-5.325		-6.084		-2.335		-18.401		-9.22		-7.501		-6.201		-14.563	-70		-25.122		-12.261		-15.219		-66.036		-12.664		-33.888
	2.379		-0.919		-3.469		0.555		0.218		1.147		2.241		1.101	-70		-13.729		-4.678		-5.43		-6.115		-2.308		-18.333		-9.624		-7.197		-6.362		-14.659	-70		-24.847		-12.22		-15.102		-66.095		-12.764		-34.154
	2.471		-0.727		-3.604		0.512		0.263		0.989		2.051		1.269	-70		-13.857		-4.98		-5.437		-6.209		-2.249		-18.26		-10.028		-6.867		-6.447		-14.734	-70		-24.589		-12.281		-14.989		-66.095		-12.831		-34.392
	2.461		-0.543		-3.587		0.508		0.286		0.875		1.789		1.392	-70		-14.018		-5.133		-5.285		-6.367		-2.166		-18.174		-10.355		-6.529		-6.426		-14.798	-70		-24.379		-12.44		-14.887		-66.04		-12.865		-34.58
	2.362		-0.373		-3.388		0.575		0.297		0.824		1.488		1.451	-70		-14.208		-5.155		-4.965		-6.569		-2.068		-18.064		-10.549		-6.198		-6.291		-14.848	-70		-24.251		-12.671		-14.789		-65.939		-12.884		-34.696
	2.204		-0.223		-3.035		0.73		0.299		0.823		1.196		1.439	-70		-14.429		-5.071		-4.525		-6.775		-1.966		-17.925		-10.586		-5.89		-6.065		-14.88	-70		-24.23		-12.936		-14.679		-65.805		-12.908		-34.73
	2.023		-0.103		-2.593		0.963		0.28		0.827		0.966		1.363	-70		-14.686		-4.9		-4.063		-6.928		-1.877		-17.756		-10.477		-5.621		-5.797		-14.894	-70		-24.322		-13.206		-14.545		-65.657		-12.94		-34.684
	1.845		-0.013		-2.129		1.245		0.224		0.788		0.843		1.229	-70		-14.977		-4.65		-3.684		-6.983		-1.819		-17.567		-10.255		-5.412		-5.55		-14.901	-70		-24.512		-13.474		-14.385		-65.511		-12.968		-34.574
	1.695		0.057		-1.694		1.537		0.131		0.678		0.855		1.045	-70		-15.291		-4.336		-3.468		-6.916		-1.816		-17.374		-9.964		-5.277		-5.39		-14.909	-70		-24.755		-13.752		-14.203		-65.379		-12.975		-34.425
	1.584		0.136		-1.313		1.799		0.025		0.495		0.996		0.818	-70		-15.604		-3.989		-3.444		-6.738		-1.891		-17.205		-9.64		-5.22		-5.362		-14.916	-70		-24.988		-14.051		-14.001		-65.259		-12.95		-34.266
	1.518		0.252		-0.991		1.99		-0.048		0.267		1.23		0.563	-70		-15.885		-3.657		-3.595		-6.484		-2.06		-17.081		-9.308		-5.224		-5.472		-14.904	-70		-25.143		-14.358		-13.787		-65.141		-12.885		-34.13
	1.481		0.429		-0.729		2.062		-0.045		0.031		1.493		0.306	-70		-16.108		-3.394		-3.869		-6.195		-2.328		-17.011		-8.979		-5.261		-5.676		-14.85	-70		-25.172		-14.629		-13.578		-65.014		-12.788		-34.05
	1.454		0.667		-0.537		1.983		0.061		-0.183		1.716		0.078	-70		-16.257		-3.235		-4.188		-5.907		-2.683		-16.995		-8.659		-5.298		-5.889		-14.737	-70		-25.061		-14.807		-13.406		-64.878		-12.672		-34.045
	1.42		0.952		-0.434		1.752		0.274		-0.36		1.847		-0.09	-70		-16.329		-3.19		-4.474		-5.652		-3.088		-17.02		-8.357		-5.313		-6.026		-14.567	-70		-24.838		-14.849		-13.31		-64.747		-12.564		-34.112
	1.382		1.254		-0.438		1.418		0.576		-0.499		1.87		-0.186	-70		-16.329		-3.24		-4.659		-5.447		-3.487		-17.074		-8.09		-5.305		-6.037		-14.363	-70		-24.567		-14.748		-13.325		-64.635		-12.495		-34.221
	1.363		1.541		-0.554		1.062		0.949		-0.603		1.805		-0.218	-70		-16.26		-3.35		-4.705		-5.299		-3.821		-17.143		-7.882		-5.284		-5.928		-14.162	-70		-24.324		-14.54		-13.462		-64.547		-12.497		-34.333
	1.384		1.785		-0.76		0.772		1.374		-0.672		1.692		-0.212	-70		-16.13		-3.477		-4.614		-5.191		-4.056		-17.22		-7.759		-5.255		-5.749		-13.992	-70		-24.182		-14.281		-13.689		-64.477		-12.587		-34.419
	1.448		1.973		-1.012		0.605		1.834		-0.702		1.571		-0.2	-70		-15.95		-3.583		-4.419		-5.091		-4.196		-17.301		-7.737		-5.213		-5.564		-13.864	-70		-24.18		-14.026		-13.94		-64.407		-12.761		-34.476
	1.533		2.114		-1.25		0.574		2.296		-0.681		1.467		-0.206	-70		-15.75		-3.635		-4.169		-4.965		-4.271		-17.39		-7.817		-5.151		-5.418		-13.769	-70		-24.316		-13.818		-14.128		-64.316		-12.998		-34.531
	1.604		2.235		-1.422		0.649		2.71		-0.602		1.382		-0.244	-70		-15.574		-3.617		-3.903		-4.803		-4.32		-17.497		-7.98		-5.076		-5.331		-13.677	-70		-24.55		-13.683		-14.184		-64.187		-13.256		-34.615
	1.637		2.364		-1.507		0.769		3.023		-0.469		1.305		-0.312	-70		-15.468		-3.538		-3.648		-4.626		-4.359		-17.631		-8.189		-5.017		-5.301		-13.556	-70		-24.812		-13.636		-14.083		-64.01		-13.482		-34.748
	1.635		2.522		-1.52		0.868		3.202		-0.3		1.222		-0.404	-70		-15.458		-3.425		-3.42		-4.481		-4.383		-17.801		-8.396		-5.005		-5.311		-13.385	-70		-25.025		-13.674		-13.861		-63.789		-13.616		-34.917
	1.617		2.706		-1.51		0.892		3.239		-0.127		1.134		-0.515	-70		-15.539		-3.318		-3.244		-4.405		-4.372		-18.007		-8.56		-5.048		-5.343		-13.167	-70		-25.125		-13.774		-13.59		-63.541		-13.605		-35.076
	1.594		2.89		-1.535		0.822		3.153		0.018		1.061		-0.636	-70		-15.683		-3.246		-3.162		-4.404		-4.312		-18.233		-8.653		-5.12		-5.371		-12.929	-70		-25.071		-13.894		-13.348		-63.293		-13.418		-35.168
	1.552		3.025		-1.636		0.678		2.967		0.111		1.038		-0.757	-70		-15.851		-3.215		-3.224		-4.445		-4.198		-18.447		-8.668		-5.174		-5.371		-12.71	-70		-24.853		-13.979		-13.182		-63.075		-13.055		-35.148
	1.46		3.051		-1.82		0.515		2.7		0.153		1.089		-0.87	-70		-16.01		-3.207		-3.471		-4.484		-4.045		-18.612		-8.61		-5.169		-5.325		-12.55	-70		-24.488		-13.981		-13.095		-62.905		-12.544		-35.006
	1.298		2.911		-2.052		0.396		2.362		0.165		1.216		-0.968	-70		-16.142		-3.2		-3.912		-4.489		-3.876		-18.701		-8.487		-5.098		-5.231		-12.464	-70		-24.025		-13.88		-13.05		-62.778		-11.926		-34.772
	1.075		2.578		-2.278		0.365		1.972		0.182		1.389		-1.051	-70		-16.243		-3.189		-4.515		-4.462		-3.717		-18.719		-8.307		-4.994		-5.107		-12.444	-70		-23.537		-13.693		-12.994		-62.676		-11.251		-34.503
	0.835		2.068		-2.451		0.422		1.562		0.234		1.564		-1.124	-70		-16.314		-3.199		-5.206		-4.434		-3.592		-18.697		-8.091		-4.915		-4.986		-12.459	-70		-23.117		-13.463		-12.882		-62.577		-10.579		-34.257
	0.638		1.439		-2.557		0.524		1.175		0.335		1.707		-1.188	-70		-16.36		-3.271		-5.887		-4.439		-3.514		-18.682		-7.877		-4.923		-4.907		-12.472	-70		-22.853		-13.25		-12.697		-62.468		-9.978		-34.072
	0.538		0.77		-2.612		0.616		0.851		0.477		1.808		-1.242	-70		-16.376		-3.44		-6.456		-4.497		-3.481		-18.71		-7.716		-5.065		-4.9		-12.455	-70		-22.802		-13.112		-12.46		-62.349		-9.528		-33.956
	0.558		0.141		-2.647		0.652		0.615		0.638		1.883		-1.276	-70		-16.349		-3.704		-6.833		-4.608		-3.474		-18.793		-7.652		-5.356		-4.967		-12.397	-70		-22.971		-13.085		-12.22		-62.23		-9.29		-33.894
	0.689		-0.385		-2.687		0.617		0.474		0.793		1.956		-1.28	-70		-16.266		-4.025		-6.977		-4.764		-3.46		-18.92		-7.695		-5.772		-5.085		-12.3	-70		-23.306		-13.178		-12.033		-62.123		-9.286		-33.851
	0.894		-0.763		-2.737		0.524		0.42		0.923		2.041		-1.25	-70		-16.123		-4.331		-6.895		-4.962		-3.407		-19.063		-7.821		-6.262		-5.218		-12.177	-70		-23.717		-13.366		-11.94		-62.032		-9.475		-33.79
	1.124		-0.97		-2.787		0.401		0.434		1.019		2.133		-1.189	-70		-15.929		-4.547		-6.641		-5.202		-3.302		-19.187		-7.979		-6.76		-5.337		-12.036	-70		-24.101		-13.604		-11.954		-61.959		-9.769		-33.676
	1.333		-1.009		-2.83		0.273		0.487		1.086		2.205		-1.115	-70		-15.711		-4.614		-6.289		-5.476		-3.161		-19.264		-8.129		-7.205		-5.432		-11.884	-70		-24.38		-13.838		-12.061		-61.907		-10.059		-33.488
	1.488		-0.91		-2.866		0.16		0.551		1.136		2.221		-1.054	-70		-15.505		-4.509		-5.912		-5.753		-3.024		-19.271		-8.254		-7.551		-5.509		-11.726	-70		-24.516		-14.022		-12.243		-61.885		-10.264		-33.232
	1.58		-0.719		-2.907		0.082		0.595		1.187		2.154		-1.036	-70		-15.346		-4.246		-5.564		-5.988		-2.931		-19.205		-8.372		-7.774		-5.574		-11.565	-70		-24.521		-14.129		-12.484		-61.908		-10.356		-32.936
	1.617		-0.483		-2.966		0.055		0.602		1.252		2.003		-1.086	-70		-15.26		-3.873		-5.264		-6.134		-2.898		-19.08		-8.523		-7.875		-5.619		-11.416	-70		-24.444		-14.152		-12.776		-61.985		-10.357		-32.647
	1.623		-0.231		-3.046		0.09		0.57		1.342		1.792		-1.214	-70		-15.255		-3.457		-5.015		-6.175		-2.903		-18.927		-8.743		-7.879		-5.629		-11.3	-70		-24.356		-14.1		-13.111		-62.117		-10.325		-32.414
	1.634		0.021		-3.146		0.182		0.518		1.467		1.568		-1.399	-70		-15.318		-3.068		-4.813		-6.129		-2.904		-18.775		-9.045		-7.827		-5.601		-11.241	-70		-24.325		-13.988		-13.474		-62.292		-10.315		-32.269
	1.682		0.265		-3.257		0.299		0.47		1.633		1.385		-1.594	-70		-15.423		-2.759		-4.658		-6.047		-2.861		-18.646		-9.406		-7.764		-5.554		-11.26	-70		-24.4		-13.836		-13.836		-62.497		-10.359		-32.224
	1.786		0.49		-3.366		0.392		0.446		1.834		1.288		-1.734	-70		-15.539		-2.557		-4.554		-5.991		-2.761		-18.543		-9.773		-7.713		-5.532		-11.356	-70		-24.604		-13.668		-14.165		-62.725		-10.448		-32.274
	1.937		0.674		-3.458		0.408		0.445		2.037		1.301		-1.764	-70		-15.648		-2.467		-4.503		-6.015		-2.63		-18.457		-10.077		-7.669		-5.579		-11.51	-70		-24.929		-13.507		-14.435		-62.976		-10.535		-32.408
	2.096		0.799		-3.515		0.32		0.45		2.187		1.418		-1.656	-70		-15.746		-2.472		-4.501		-6.146		-2.521		-18.368		-10.257		-7.605		-5.718		-11.691	-70		-25.348		-13.375		-14.636		-63.24		-10.554		-32.62
	2.218		0.865		-3.523		0.138		0.442		2.227		1.606		-1.424	-70		-15.845		-2.542		-4.537		-6.381		-2.493		-18.261		-10.283		-7.494		-5.924		-11.877	-70		-25.821		-13.293		-14.776		-63.483		-10.45		-32.909
	2.273		0.892		-3.478		-0.087		0.414		2.125		1.812		-1.119	-70		-15.951		-2.642		-4.601		-6.687		-2.583		-18.12		-10.168		-7.339		-6.129		-12.066	-70		-26.308		-13.279		-14.868		-63.65		-10.203		-33.263
	2.262		0.918		-3.384		-0.296		0.379		1.898		1.975		-0.804	-70		-16.064		-2.742		-4.685		-7		-2.787		-17.937		-9.963		-7.176		-6.244		-12.27	-70		-26.775		-13.348		-14.925		-63.681		-9.841		-33.647
	2.216		0.976		-3.251		-0.443		0.358		1.606		2.046		-0.539	-70		-16.17		-2.823		-4.787		-7.243		-3.055		-17.715		-9.743		-7.06		-6.192		-12.505	-70		-27.206		-13.505		-14.954		-63.542		-9.433		-34.012
	2.183		1.079		-3.089		-0.516		0.375		1.324		2		-0.354	-70		-16.256		-2.878		-4.905		-7.358		-3.307		-17.47		-9.59		-7.031		-5.95		-12.771	-70		-27.594		-13.739		-14.954		-63.232		-9.06		-34.305
	2.207		1.217		-2.909		-0.538		0.448		1.111		1.842		-0.244	-70		-16.304		-2.904		-5.04		-7.327		-3.463		-17.234		-9.559		-7.098		-5.562		-13.052	-70		-27.937		-14.018		-14.921		-62.785		-8.788		-34.494
	2.312		1.359		-2.721		-0.541		0.584		0.996		1.6		-0.177	-70		-16.288		-2.898		-5.183		-7.193		-3.471		-17.04		-9.666		-7.235		-5.127		-13.325	-70		-28.221		-14.295		-14.857		-62.253		-8.645		-34.582
	2.492		1.47		-2.537		-0.544		0.778		0.982		1.317		-0.112	-70		-16.175		-2.859		-5.326		-7.036		-3.323		-16.915		-9.883		-7.401		-4.761		-13.564	-70		-28.416		-14.52		-14.764		-61.702		-8.623		-34.601
	2.712		1.526		-2.362		-0.546		1.007		1.065		1.038		-0.017	-70		-15.938		-2.794		-5.457		-6.937		-3.05		-16.868		-10.147		-7.558		-4.549		-13.753	-70		-28.48		-14.662		-14.649		-61.2		-8.689		-34.595
	2.92		1.523		-2.191		-0.525		1.234		1.237		0.8		0.118	-70		-15.577		-2.721		-5.571		-6.937		-2.709		-16.892		-10.39		-7.675		-4.515		-13.883	-70		-28.375		-14.721		-14.512		-60.808		-8.806		-34.598
	3.066		1.474		-2.013		-0.466		1.414		1.49		0.624		0.278	-70		-15.134		-2.659		-5.671		-7.026		-2.357		-16.968		-10.564		-7.732		-4.617		-13.955	-70		-28.094		-14.737		-14.347		-60.568		-8.94		-34.622
	3.115		1.393		-1.82		-0.366		1.51		1.804		0.514		0.43	-70		-14.684		-2.619		-5.769		-7.152		-2.046		-17.073		-10.657		-7.711		-4.772		-13.984	-70		-27.675		-14.765		-14.148		-60.487		-9.074		-34.664
	3.062		1.289		-1.616		-0.237		1.515		2.143		0.453		0.54	-70		-14.306		-2.602		-5.882		-7.256		-1.813		-17.176		-10.682		-7.608		-4.895		-13.996	-70		-27.202		-14.853		-13.917		-60.544		-9.198		-34.707
	2.921		1.156		-1.426		-0.096		1.45		2.452		0.413		0.592	-70		-14.06		-2.605		-6.022		-7.291		-1.67		-17.246		-10.662		-7.431		-4.932		-14.02	-70		-26.771		-15.01		-13.662		-60.697		-9.311		-34.741
	2.723		0.997		-1.287		0.049		1.359		2.674		0.375		0.598	-70		-13.967		-2.63		-6.187		-7.244		-1.601		-17.265		-10.619		-7.208		-4.883		-14.077	-70		-26.458		-15.198		-13.397		-60.896		-9.412		-34.759
	2.498		0.825		-1.236		0.199		1.292		2.76		0.342		0.59	-70		-14.02		-2.701		-6.354		-7.138		-1.571		-17.235		-10.567		-6.975		-4.798		-14.168	-70		-26.287		-15.349		-13.133		-61.098		-9.5		-34.759
	2.274		0.671		-1.297		0.356		1.286		2.688		0.346		0.604	-70		-14.189		-2.846		-6.481		-7.019		-1.539		-17.178		-10.517		-6.769		-4.745		-14.278	-70		-26.228		-15.402		-12.88		-61.274		-9.58		-34.73
	2.066		0.56		-1.47		0.519		1.35		2.476		0.429		0.659	-70		-14.425		-3.083		-6.526		-6.943		-1.478		-17.127		-10.473		-6.622		-4.779		-14.387	-70		-26.217		-15.333		-12.651		-61.414		-9.658		-34.662
	1.883		0.492		-1.739		0.673		1.466		2.176		0.619		0.748	-70		-14.669		-3.4		-6.467		-6.948		-1.388		-17.108		-10.431		-6.556		-4.914		-14.481	-70		-26.191		-15.157		-12.462		-61.52		-9.751		-34.557
	1.734		0.435		-2.074		0.796		1.597		1.85		0.903		0.844	-70		-14.856		-3.745		-6.32		-7.04		-1.286		-17.13		-10.375		-6.579		-5.12		-14.552	-70		-26.119		-14.911		-12.33		-61.605		-9.877		-34.442
	1.636		0.34		-2.439		0.862		1.704		1.543		1.226		0.914	-70		-14.949		-4.049		-6.14		-7.188		-1.192		-17.181		-10.287		-6.687		-5.334		-14.599	-70		-26.001		-14.619		-12.257		-61.681		-10.055		-34.368
	1.616		0.17		-2.8		0.842		1.763		1.272		1.516		0.93	-70		-14.945		-4.242		-5.995		-7.342		-1.115		-17.231		-10.158		-6.851		-5.486		-14.628	-70		-25.856		-14.286		-12.233		-61.758		-10.295		-34.378
	1.7		-0.083		-3.123		0.718		1.773		1.029		1.719		0.873	-70		-14.877		-4.284		-5.942		-7.449		-1.048		-17.249		-9.994		-7.023		-5.527		-14.641	-70		-25.695		-13.901		-12.234		-61.848		-10.594		-34.477
	1.897		-0.393		-3.381		0.488		1.743		0.81		1.822		0.739	-70		-14.79		-4.171		-6		-7.469		-0.983		-17.216		-9.805		-7.151		-5.446		-14.632	-70		-25.516		-13.463		-12.242		-61.962		-10.93		-34.623
	2.189		-0.705		-3.56		0.177		1.682		0.628		1.853		0.533	-70		-14.7		-3.936		-6.138		-7.398		-0.926		-17.133		-9.601		-7.195		-5.27		-14.582	-70		-25.308		-12.994		-12.247		-62.116		-11.259		-34.744
	2.527		-0.946		-3.664		-0.164		1.594		0.509		1.851		0.282	-70		-14.589		-3.631		-6.29		-7.261		-0.902		-17.026		-9.383		-7.135		-5.052		-14.463	-70		-25.075		-12.533		-12.258		-62.321		-11.532		-34.764
	2.854		-1.042		-3.707		-0.472		1.484		0.476		1.843		0.022	-70		-14.414		-3.308		-6.389		-7.118		-0.943		-16.937		-9.149		-6.978		-4.844		-14.257	-70		-24.836		-12.125		-12.294		-62.574		-11.707		-34.639
	3.12		-0.931		-3.709		-0.689		1.361		0.53		1.838		-0.205	-70		-14.142		-3.004		-6.391		-7.038		-1.07		-16.909		-8.905		-6.744		-4.684		-13.963	-70		-24.631		-11.798		-12.371		-62.848		-11.764		-34.363
	3.295		-0.584		-3.686		-0.78		1.243		0.65		1.83		-0.367	-70		-13.781		-2.732		-6.298		-7.08		-1.276		-16.968		-8.669		-6.469		-4.583		-13.607	-70		-24.495		-11.564		-12.485		-63.083		-11.715		-33.966
	3.375		-0.021		-3.647		-0.745		1.145		0.8		1.812		-0.456	-70		-13.379		-2.486		-6.14		-7.265		-1.531		-17.113		-8.469		-6.2		-4.539		-13.236	-70		-24.452		-11.417		-12.619		-63.204		-11.601		-33.498
	3.374		0.677		-3.6		-0.614		1.067		0.94		1.783		-0.488	-70		-13.01		-2.255		-5.957		-7.569		-1.794		-17.312		-8.332		-5.986		-4.544		-12.895	-70		-24.498		-11.349		-12.738		-63.143		-11.477		-33.019
	3.316		1.39		-3.558		-0.438		0.995		1.04		1.745		-0.496	-70		-12.739		-2.042		-5.776		-7.927		-2.027		-17.521		-8.266		-5.867		-4.593		-12.621	-70		-24.604		-11.358		-12.808		-62.871		-11.394		-32.586
	3.224		1.988		-3.533		-0.272		0.903		1.079		1.697		-0.505	-70		-12.612		-1.869		-5.607		-8.26		-2.199		-17.698		-8.262		-5.857		-4.683		-12.43	-70		-24.731		-11.444		-12.797		-62.418		-11.378		-32.251
	3.107		2.373		-3.536		-0.151		0.766		1.051		1.635		-0.53	-70		-12.642		-1.769		-5.449		-8.497		-2.288		-17.815		-8.295		-5.935		-4.809		-12.323	-70		-24.849		-11.596		-12.686		-61.869		-11.421		-32.047
	2.961		2.515		-3.571		-0.081		0.577		0.967		1.555		-0.564	-70		-12.811		-1.771		-5.306		-8.595		-2.286		-17.866		-8.349		-6.058		-4.954		-12.296	-70		-24.951		-11.785		-12.473		-61.334		-11.48		-31.987
	2.785		2.451		-3.632		-0.039		0.359		0.846		1.47		-0.597	-70		-13.069		-1.889		-5.19		-8.544		-2.2		-17.866		-8.423		-6.185		-5.093		-12.347	-70		-25.056		-11.967		-12.176		-60.91		-11.504		-32.052
	2.594		2.266		-3.708		0.001		0.163		0.712		1.409		-0.62	-70		-13.345		-2.117		-5.117		-8.369		-2.062		-17.845		-8.537		-6.302		-5.191		-12.475	-70		-25.194		-12.094		-11.839		-60.646		-11.458		-32.205
	2.417		2.051		-3.786		0.046		0.057		0.572		1.407		-0.634	-70		-13.575		-2.428		-5.098		-8.11		-1.919		-17.837		-8.704		-6.422		-5.224		-12.665	-70		-25.383		-12.125		-11.526		-60.53		-11.342		-32.402
	2.286		1.871		-3.85		0.076		0.093		0.42		1.484		-0.649	-70		-13.719		-2.782		-5.13		-7.817		-1.821		-17.868		-8.917		-6.568		-5.183		-12.89	-70		-25.608		-12.045		-11.311		-60.502		-11.194		-32.604
	2.213		1.751		-3.885		0.052		0.289		0.248		1.636		-0.672	-70		-13.775		-3.133		-5.198		-7.531		-1.796		-17.946		-9.137		-6.747		-5.084		-13.114	-70		-25.814		-11.861		-11.254		-60.488		-11.074		-32.791
	2.179		1.681		-3.884		-0.059		0.621		0.053		1.828		-0.696	-70		-13.762		-3.436		-5.274		-7.281		-1.843		-18.058		-9.312		-6.936		-4.962		-13.309	-70		-25.936		-11.606		-11.378		-60.429		-11.038		-32.956
	2.141		1.631		-3.853		-0.256		1.032		-0.145		2.017		-0.696	-70		-13.709		-3.654		-5.326		-7.082		-1.926		-18.176		-9.4		-7.089		-4.852		-13.466	-70		-25.923		-11.328		-11.658		-60.304		-11.119		-33.104
	2.052		1.567		-3.817		-0.506		1.457		-0.314		2.162		-0.636	-70		-13.646		-3.761		-5.324		-6.942		-1.994		-18.278		-9.39		-7.16		-4.775		-13.594	-70		-25.778		-11.073		-12.018		-60.13		-11.311		-33.248
	1.884		1.455		-3.808		-0.749		1.837		-0.419		2.239		-0.489	-70		-13.601		-3.751		-5.25		-6.864		-2.005		-18.355		-9.3		-7.125		-4.729		-13.708	-70		-25.547		-10.876		-12.357		-59.943		-11.57		-33.401
	1.649		1.268		-3.84		-0.924		2.132		-0.433		2.236		-0.255	-70		-13.606		-3.631		-5.107		-6.85		-1.946		-18.413		-9.174		-6.986		-4.691		-13.82	-70		-25.304		-10.754		-12.588		-59.777		-11.828		-33.572
	1.395		0.987		-3.898		-0.99		2.32		-0.346		2.163		0.032	-70		-13.681		-3.421		-4.927		-6.89		-1.846		-18.465		-9.058		-6.764		-4.627		-13.927	-70		-25.104		-10.705		-12.669		-59.64		-12.015		-33.765
	1.19		0.617		-3.94		-0.939		2.396		-0.168		2.042		0.314	-70		-13.823		-3.155		-4.757		-6.959		-1.76		-18.514		-8.991		-6.489		-4.514		-14.027	-70		-24.963		-10.723		-12.62		-59.511		-12.081		-33.976
	1.099		0.188		-3.917		-0.79		2.376		0.073		1.907		0.539	-70		-14.009		-2.869		-4.648		-7.021		-1.746		-18.545		-8.998		-6.194		-4.348		-14.115	-70		-24.858		-10.795		-12.512		-59.361		-12.007		-34.199
	1.155		-0.246		-3.802		-0.58		2.296		0.329		1.787		0.677	-70		-14.206		-2.593		-4.634		-7.041		-1.835		-18.533		-9.083		-5.913		-4.153		-14.185	-70		-24.751		-10.902		-12.429		-59.171		-11.804		-34.426
	1.341		-0.624		-3.606		-0.347		2.208		0.543		1.688		0.741	-70		-14.385		-2.348		-4.721		-6.997		-2.015		-18.459		-9.233		-5.676		-3.966		-14.224	-70		-24.616		-11.019		-12.426		-58.951		-11.507		-34.65
	1.594		-0.889		-3.368		-0.124		2.162		0.672		1.597		0.769	-70		-14.534		-2.147		-4.874		-6.895		-2.232		-18.333		-9.417		-5.501		-3.824		-14.21	-70		-24.446		-11.116		-12.502		-58.745		-11.157		-34.85
	1.825		-1.004		-3.137		0.071		2.187		0.706		1.494		0.806	-70		-14.644		-1.998		-5.03		-6.766		-2.42		-18.2		-9.593		-5.397		-3.736		-14.125	-70		-24.25		-11.18		-12.604		-58.608		-10.781		-34.991
	1.952		-0.956		-2.949		0.229		2.275		0.677		1.364		0.877	-70		-14.704		-1.915		-5.119		-6.646		-2.531		-18.122		-9.721		-5.368		-3.682		-13.963	-70		-24.035		-11.226		-12.661		-58.588		-10.388		-35.034
	1.928		-0.758		-2.818		0.352		2.392		0.649		1.215		0.975	-70		-14.692		-1.911		-5.09		-6.563		-2.559		-18.146		-9.774		-5.418		-3.616		-13.739	-70		-23.807		-11.297		-12.615		-58.704		-9.98		-34.95
	1.764		-0.456		-2.741		0.435		2.501		0.694		1.063		1.066	-70		-14.585		-1.989		-4.935		-6.525		-2.541		-18.271		-9.744		-5.546		-3.491		-13.487	-70		-23.578		-11.445		-12.454		-58.939		-9.565		-34.747
	1.516		-0.119		-2.719		0.47		2.583		0.859		0.925		1.105	-70		-14.38		-2.127		-4.688		-6.529		-2.537		-18.447		-9.636		-5.732		-3.278		-13.249	-70		-23.372		-11.702		-12.208		-59.257		-9.174		-34.461
	1.267		0.178		-2.756		0.442		2.641		1.151		0.814		1.056	-70		-14.103		-2.29		-4.409		-6.575		-2.593		-18.596		-9.458		-5.927		-2.983		-13.067	-70		-23.225		-12.053		-11.944		-59.607		-8.846		-34.144
	1.093		0.379		-2.858		0.336		2.681		1.534		0.738		0.906	-70		-13.814		-2.436		-4.165		-6.673		-2.722		-18.649		-9.224		-6.063		-2.642		-12.973	-70		-23.169		-12.441		-11.741		-59.943		-8.614		-33.842
	1.04		0.462		-3.018		0.158		2.696		1.939		0.709		0.658	-70		-13.58		-2.533		-4.006		-6.83		-2.894		-18.576		-8.953		-6.075		-2.315		-12.977	-70		-23.213		-12.788		-11.674		-60.214		-8.485		-33.59
	1.107		0.435		-3.206		-0.067		2.656		2.283		0.737		0.334	-70		-13.448		-2.566		-3.95		-7.041		-3.052		-18.393		-8.677		-5.931		-2.067		-13.069	-70		-23.342		-13.027		-11.789		-60.378		-8.441		-33.418
	1.254		0.329		-3.376		-0.288		2.525		2.497		0.817		-0.031	-70		-13.419		-2.528		-3.982		-7.277		-3.145		-18.144		-8.434		-5.647		-1.946		-13.219	-70		-23.524		-13.128		-12.092		-60.401		-8.466		-33.353
	1.431		0.177		-3.48		-0.451		2.286		2.546		0.925		-0.396	-70		-13.445		-2.415		-4.058		-7.489		-3.148		-17.881		-8.254		-5.282		-1.969		-13.39	-70		-23.72		-13.112		-12.534		-60.277		-8.554		-33.416
	1.601		0.01		-3.491		-0.517		1.956		2.44		1.021		-0.716	-70		-13.462		-2.232		-4.127		-7.633		-3.076		-17.638		-8.149		-4.918		-2.119		-13.557	-70		-23.902		-13.034		-13.027		-60.033		-8.714		-33.607
	1.755		-0.14		-3.404		-0.483		1.588		2.227		1.061		-0.95	-70		-13.424		-1.998		-4.148		-7.683		-2.969		-17.424		-8.105		-4.63		-2.354		-13.711	-70		-24.054		-12.962		-13.476		-59.726		-8.951		-33.895
	1.907		-0.242		-3.229		-0.377		1.251		1.972		1.014		-1.076	-70		-13.321		-1.754		-4.109		-7.647		-2.869		-17.227		-8.095		-4.456		-2.626		-13.863	-70		-24.172		-12.938		-13.812		-59.427		-9.244		-34.228
	2.068		-0.278		-2.987		-0.241		1.001		1.727		0.879		-1.095	-70		-13.181		-1.553		-4.031		-7.552		-2.801		-17.033		-8.097		-4.394		-2.9		-14.031	-70		-24.262		-12.96		-14.008		-59.198		-9.543		-34.548
	2.225		-0.245		-2.7		-0.104		0.865		1.523		0.686		-1.03	-70		-13.044		-1.44		-3.957		-7.428		-2.758		-16.838		-8.106		-4.411		-3.16		-14.217	-70		-24.336		-12.984		-14.08		-59.08		-9.786		-34.803
	2.337		-0.169		-2.401		0.031		0.833		1.366		0.501		-0.919	-70		-12.938		-1.436		-3.935		-7.286		-2.717		-16.653		-8.137		-4.462		-3.402		-14.396	-70		-24.402		-12.953		-14.071		-59.084		-9.928		-34.959
	2.359		-0.091		-2.133		0.182		0.867		1.251		0.398		-0.805	-70		-12.871		-1.53		-3.995		-7.127		-2.649		-16.492		-8.205		-4.517		-3.626		-14.518	-70		-24.463		-12.841		-14.033		-59.2		-9.954		-34.993
	2.272		-0.05		-1.944		0.363		0.923		1.171		0.433		-0.722	-70		-12.835		-1.685		-4.134		-6.948		-2.542		-16.361		-8.309		-4.568		-3.83		-14.533	-70		-24.508		-12.668		-14.02		-59.4		-9.886		-34.894
	2.103		-0.063		-1.872		0.557		0.967		1.12		0.612		-0.692	-70		-12.818		-1.862		-4.314		-6.768		-2.405		-16.258		-8.423		-4.633		-4.007		-14.425	-70		-24.52		-12.491		-14.068		-59.646		-9.761		-34.664
	1.919		-0.12		-1.93		0.709		0.982		1.093		0.888		-0.711	-70		-12.816		-2.039		-4.471		-6.629		-2.268		-16.181		-8.504		-4.735		-4.148		-14.227	-70		-24.48		-12.365		-14.189		-59.898		-9.614		-34.323
	1.796		-0.189		-2.089		0.757		0.969		1.089		1.178		-0.753	-70		-12.83		-2.223		-4.539		-6.584		-2.167		-16.135		-8.52		-4.887		-4.252		-14.008	-70		-24.387		-12.31		-14.368		-60.123		-9.468		-33.912
	1.783		-0.229		-2.292		0.664		0.934		1.109		1.402		-0.777	-70		-12.862		-2.443		-4.473		-6.675		-2.134		-16.133		-8.477		-5.086		-4.327		-13.837	-70		-24.259		-12.301		-14.571		-60.296		-9.335		-33.485
	1.879		-0.207		-2.474		0.444		0.885		1.153		1.518		-0.749	-70		-12.912		-2.729		-4.27		-6.916		-2.184		-16.192		-8.414		-5.308		-4.379		-13.742	-70		-24.135		-12.287		-14.761		-60.413		-9.218		-33.092
	2.032		-0.109		-2.593		0.161		0.822		1.219		1.537		-0.664	-70		-12.975		-3.091		-3.978		-7.278		-2.3		-16.32		-8.386		-5.522		-4.4		-13.705	-70		-24.051		-12.223		-14.907		-60.48		-9.125		-32.766
	2.165		0.058		-2.651		-0.111		0.75		1.298		1.503		-0.551	-70		-13.047		-3.506		-3.683		-7.699		-2.433		-16.522		-8.423		-5.696		-4.364		-13.678	-70		-24.027		-12.098		-15.001		-60.511		-9.059		-32.517
	2.209		0.266		-2.684		-0.321		0.681		1.381		1.468		-0.463	-70		-13.128		-3.922		-3.484		-8.097		-2.523		-16.795		-8.51		-5.806		-4.238		-13.625	-70		-24.057		-11.945		-15.045		-60.514		-9.019		-32.34
	2.126		0.477		-2.735		-0.456		0.646		1.467		1.458		-0.443	-70		-13.22		-4.271		-3.458		-8.393		-2.517		-17.128		-8.6		-5.841		-4.014		-13.55	-70		-24.113		-11.821		-15.054		-60.494		-8.988		-32.226
	1.934		0.652		-2.831		-0.526		0.684		1.562		1.464		-0.504	-70		-13.323		-4.487		-3.631		-8.538		-2.398		-17.486		-8.641		-5.812		-3.73		-13.498	-70		-24.168		-11.777		-15.041		-60.445		-8.945		-32.176
	1.689		0.773		-2.974		-0.542		0.826		1.676		1.453		-0.626	-70		-13.434		-4.522		-3.971		-8.525		-2.186		-17.808		-8.6		-5.753		-3.462		-13.523	-70		-24.204		-11.831		-15.019		-60.361		-8.872		-32.187
	1.465		0.84		-3.144		-0.494		1.074		1.805		1.388		-0.772	-70		-13.54		-4.365		-4.403		-8.388		-1.931		-18.017		-8.484		-5.708		-3.297		-13.654	-70		-24.212		-11.956		-14.992		-60.234		-8.771		-32.249
	1.323		0.875		-3.318		-0.362		1.392		1.929		1.256		-0.916	-70		-13.634		-4.042		-4.843		-8.184		-1.685		-18.043		-8.325		-5.714		-3.291		-13.871	-70		-24.188		-12.097		-14.953		-60.066		-8.667		-32.334
	1.297		0.906		-3.474		-0.138		1.714		2.016		1.072		-1.049	-70		-13.717		-3.611		-5.222		-7.971		-1.49		-17.86		-8.167		-5.78		-3.451		-14.113	-70		-24.126		-12.201		-14.886		-59.866		-8.599		-32.4
	1.388		0.957		-3.597		0.157		1.974		2.044		0.866		-1.174	-70		-13.802		-3.152		-5.502		-7.785		-1.36		-17.501		-8.049		-5.882		-3.737		-14.308	-70		-24.021		-12.233		-14.771		-59.66		-8.608		-32.407
	1.577		1.034		-3.677		0.463		2.129		2.014		0.671		-1.295	-70		-13.908		-2.745		-5.665		-7.637		-1.289		-17.054		-7.993		-5.975		-4.082		-14.403	-70		-23.882		-12.186		-14.601		-59.48		-8.717		-32.329
	1.823		1.122		-3.701		0.699		2.177		1.948		0.503		-1.402	-70		-14.045		-2.466		-5.707		-7.514		-1.251		-16.623		-8		-6.016		-4.414		-14.384	-70		-23.727		-12.06		-14.393		-59.347		-8.914		-32.171
	2.074		1.182		-3.657		0.791		2.147		1.879		0.364		-1.472	-70		-14.205		-2.367		-5.635		-7.4		-1.218		-16.293		-8.055		-5.987		-4.676		-14.28	-70		-23.582		-11.855		-14.187		-59.261		-9.157		-31.96
	2.27		1.174		-3.539		0.707		2.074		1.83		0.258		-1.479	-70		-14.361		-2.467		-5.472		-7.282		-1.173		-16.089		-8.129		-5.899		-4.84		-14.149	-70		-23.463		-11.565		-14.029		-59.202		-9.379		-31.735
	2.36		1.075		-3.347		0.465		1.977		1.806		0.2		-1.41	-70		-14.481		-2.742		-5.259		-7.165		-1.124		-15.987		-8.196		-5.784		-4.9		-14.067	-70		-23.374		-11.191		-13.957		-59.143		-9.525		-31.536
	2.321		0.892		-3.096		0.131		1.846		1.799		0.206		-1.268	-70		-14.54		-3.126		-5.053		-7.061		-1.095		-15.941		-8.233		-5.67		-4.865		-14.097	-70		-23.3		-10.761		-13.983		-59.079		-9.569		-31.396
	2.164		0.666		-2.813		-0.217		1.653		1.798		0.288		-1.071	-70		-14.53		-3.527		-4.908		-6.994		-1.115		-15.915		-8.23		-5.571		-4.749		-14.278	-70		-23.218		-10.332		-14.099		-59.025		-9.527		-31.341
	1.929		0.457		-2.534		-0.515		1.376		1.798		0.438		-0.844	-70		-14.461		-3.864		-4.862		-6.982		-1.2		-15.905		-8.186		-5.486		-4.562		-14.606	-70		-23.104		-9.981		-14.282		-59.007		-9.443		-31.385
	1.665		0.315		-2.303		-0.729		1.02		1.798		0.627		-0.611	-70		-14.353		-4.088		-4.916		-7.039		-1.339		-15.934		-8.103		-5.408		-4.319		-15.031	-70		-22.94		-9.781		-14.508		-59.046		-9.362		-31.527
	1.406		0.256		-2.162		-0.856		0.62		1.791		0.815		-0.386	-70		-14.227		-4.189		-5.043		-7.163		-1.501		-16.024		-7.983		-5.334		-4.045		-15.472	-70		-22.723		-9.778		-14.749		-59.149		-9.315		-31.754
	1.169		0.255		-2.137		-0.916		0.235		1.758		0.964		-0.183	-70		-14.095		-4.187		-5.193		-7.334		-1.652		-16.18		-7.829		-5.268		-3.781		-15.837	-70		-22.47		-9.985		-14.98		-59.305		-9.31		-32.038
	0.96		0.26		-2.224		-0.936		-0.071		1.681		1.051		-0.013	-70		-13.964		-4.111		-5.312		-7.514		-1.767		-16.384		-7.653		-5.219		-3.573		-16.054	-70		-22.214		-10.378		-15.172		-59.498		-9.337		-32.346
	0.784		0.225		-2.378		-0.942		-0.25		1.553		1.069		0.116	-70		-13.834		-3.98		-5.356		-7.66		-1.836		-16.6		-7.478		-5.195		-3.463		-16.088	-70		-21.987		-10.906		-15.288		-59.708		-9.374		-32.648
	0.651		0.13		-2.526		-0.952		-0.282		1.391		1.031		0.204	-70		-13.701		-3.802		-5.311		-7.731		-1.861		-16.791		-7.336		-5.198		-3.464		-15.946	-70		-21.812		-11.498		-15.288		-59.907		-9.401		-32.925
	0.569		-0.005		-2.588		-0.978		-0.186		1.235		0.958		0.264	-70		-13.559		-3.573		-5.191		-7.707		-1.849		-16.925		-7.247		-5.226		-3.559		-15.663	-70		-21.691		-12.083		-15.142		-60.061		-9.402		-33.17
	0.54		-0.14		-2.515		-1.026		-0.008		1.125		0.868		0.317	-70		-13.406		-3.3		-5.031		-7.595		-1.807		-16.991		-7.209		-5.266		-3.706		-15.28	-70		-21.612		-12.607		-14.854		-60.142		-9.371		-33.385
	0.558		-0.243		-2.309		-1.096		0.194		1.094		0.776		0.378	-70		-13.252		-3.002		-4.876		-7.433		-1.741		-17.001		-7.198		-5.298		-3.863		-14.842	-70		-21.558		-13.046		-14.471		-60.138		-9.314		-33.571
	0.62		-0.317		-2.016		-1.18		0.376		1.149		0.687		0.449	-70		-13.115		-2.719		-4.757		-7.279		-1.651		-16.986		-7.194		-5.293		-4.008		-14.386	-70		-21.508		-13.392		-14.072		-60.059		-9.241		-33.728
	0.734		-0.394		-1.711		-1.265		0.528		1.279		0.61		0.508	-70		-13.014		-2.502		-4.687		-7.191		-1.543		-16.982		-7.191		-5.227		-4.144		-13.956	-70		-21.448		-13.639		-13.739		-59.936		-9.172		-33.847
	0.906		-0.519		-1.458		-1.33		0.669		1.454		0.564		0.527	-70		-12.943		-2.4		-4.658		-7.198		-1.426		-17.014		-7.212		-5.092		-4.295		-13.593	-70		-21.368		-13.765		-13.524		-59.808		-9.126		-33.916
	1.133		-0.719		-1.29		-1.352		0.826		1.632		0.567		0.483	-70		-12.877		-2.436		-4.653		-7.284		-1.327		-17.08		-7.283		-4.898		-4.48		-13.334	-70		-21.268		-13.742		-13.438		-59.71		-9.123		-33.921
	1.391		-0.977		-1.2		-1.318		1.019		1.763		0.637		0.379	-70		-12.773		-2.601		-4.656		-7.389		-1.279		-17.155		-7.419		-4.68		-4.7		-13.208	-70		-21.157		-13.559		-13.459		-59.667		-9.181		-33.847
	1.641		-1.234		-1.156		-1.227		1.244		1.802		0.772		0.237	-70		-12.603		-2.85		-4.661		-7.44		-1.315		-17.199		-7.609		-4.48		-4.935		-13.227	-70		-21.057		-13.241		-13.556		-59.684		-9.32		-33.691
	1.855		-1.41		-1.132		-1.094		1.482		1.724		0.957		0.096	-70		-12.376		-3.126		-4.679		-7.387		-1.446		-17.175		-7.828		-4.337		-5.157		-13.386	-70		-20.995		-12.859		-13.707		-59.754		-9.552		-33.466
	2.026		-1.428		-1.124		-0.942		1.712		1.538		1.159		-0.014	-70		-12.14		-3.375		-4.727		-7.231		-1.659		-17.061		-8.055		-4.274		-5.348		-13.656	-70		-20.994		-12.497		-13.891		-59.856		-9.882		-33.204
	2.172		-1.247		-1.156		-0.797		1.921		1.295		1.341		-0.083	-70		-11.967		-3.564		-4.823		-7.011		-1.921		-16.856		-8.278		-4.298		-5.511		-13.984	-70		-21.056		-12.23		-14.085		-59.974		-10.291		-32.947
	2.313		-0.877		-1.258		-0.678		2.105		1.064		1.466		-0.124	-70		-11.915		-3.685		-4.973		-6.779		-2.189		-16.585		-8.496		-4.398		-5.669		-14.296	-70		-21.165		-12.1		-14.259		-60.102		-10.731		-32.725
	2.458		-0.378		-1.434		-0.598		2.257		0.909		1.501		-0.168	-70		-12		-3.74		-5.162		-6.56		-2.425		-16.294		-8.713		-4.556		-5.847		-14.523	-70		-21.291		-12.123		-14.386		-60.243		-11.138		-32.538
	2.594		0.164		-1.657		-0.562		2.365		0.858		1.427		-0.246	-70		-12.195		-3.741		-5.359		-6.347		-2.603		-16.041		-8.934		-4.751		-6.052		-14.619	-70		-21.403		-12.298		-14.454		-60.392		-11.459		-32.364
	2.688		0.661		-1.878		-0.572		2.409		0.896		1.241		-0.377	-70		-12.437		-3.702		-5.527		-6.114		-2.706		-15.875		-9.159		-4.961		-6.275		-14.581	-70		-21.484		-12.603		-14.469		-60.516		-11.672		-32.175
	2.708		1.057		-2.053		-0.627		2.376		0.981		0.953		-0.555	-70		-12.663		-3.646		-5.638		-5.848		-2.729		-15.82		-9.386		-5.17		-6.489		-14.442	-70		-21.53		-12.997		-14.449		-60.552		-11.792		-31.957
	2.641		1.332		-2.166		-0.732		2.276		1.065		0.586		-0.754	-70		-12.836		-3.594		-5.683		-5.569		-2.67		-15.861		-9.606		-5.36		-6.665		-14.256	-70		-21.557		-13.418		-14.408		-60.427		-11.846		-31.731
	2.505		1.498		-2.239		-0.888		2.144		1.117		0.172		-0.945	-70		-12.951		-3.559		-5.67		-5.333		-2.533		-15.95		-9.798		-5.515		-6.768		-14.075	-70		-21.583		-13.803		-14.343		-60.09		-11.855		-31.545
	2.355		1.585		-2.313		-1.09		2.032		1.134		-0.245		-1.106	-70		-13.035		-3.536		-5.613		-5.208		-2.33		-16.03		-9.935		-5.621		-6.77		-13.938	-70		-21.628		-14.106		-14.238		-59.544		-11.821		-31.454
	2.26		1.629		-2.43		-1.322		1.988		1.127		-0.613		-1.229	-70		-13.122		-3.507		-5.518		-5.239		-2.087		-16.055		-9.989		-5.677		-6.653		-13.862	-70		-21.702		-14.32		-14.074		-58.848		-11.732		-31.501
	2.278		1.665		-2.611		-1.558		2.031		1.116		-0.878		-1.31	-70		-13.239		-3.451		-5.385		-5.43		-1.846		-16.021		-9.942		-5.695		-6.423		-13.841	-70		-21.807		-14.464		-13.854		-58.099		-11.581		-31.69
	2.425		1.717		-2.853		-1.764		2.145		1.113		-1.009		-1.34	-70		-13.396		-3.367		-5.213		-5.737		-1.65		-15.967		-9.8		-5.707		-6.109		-13.852	-70		-21.929		-14.571		-13.603		-57.385		-11.373		-31.995
	2.668		1.795		-3.137		-1.908		2.29		1.111		-1.01		-1.302	-70		-13.582		-3.273		-5.014		-6.088		-1.534		-15.957		-9.59		-5.754		-5.76		-13.859	-70		-22.049		-14.659		-13.368		-56.763		-11.129		-32.369
	2.931		1.887		-3.432		-1.965		2.427		1.086		-0.923		-1.189	-70		-13.769		-3.205		-4.818		-6.406		-1.52		-16.048		-9.353		-5.871		-5.428		-13.829	-70		-22.145		-14.725		-13.191		-56.251		-10.879		-32.76
	3.128		1.961		-3.702		-1.92		2.539		1.008		-0.82		-1.02	-70		-13.929		-3.19		-4.66		-6.637		-1.613		-16.252		-9.125		-6.068		-5.15		-13.748	-70		-22.205		-14.747		-13.089		-55.841		-10.656		-33.13
	3.191		1.982		-3.904		-1.771		2.631		0.864		-0.765		-0.848	-70		-14.033		-3.236		-4.561		-6.757		-1.804		-16.535		-8.926		-6.326		-4.942		-13.624	-70		-22.231		-14.696		-13.048		-55.532		-10.484		-33.462
	3.094		1.924		-4.002		-1.52		2.714		0.668		-0.802		-0.747	-70		-14.068		-3.317		-4.519		-6.767		-2.07		-16.827		-8.761		-6.606		-4.8		-13.49	-70		-22.238		-14.55		-13.032		-55.333		-10.372		-33.747
	2.855		1.793		-3.976		-1.178		2.786		0.466		-0.935		-0.78	-70		-14.033		-3.391		-4.509		-6.687		-2.371		-17.06		-8.627		-6.857		-4.713		-13.386	-70		-22.248		-14.299		-13.005		-55.267		-10.309		-33.982
	2.527		1.621		-3.828		-0.755		2.823		0.316		-1.14		-0.971	-70		-13.949		-3.414		-4.504		-6.535		-2.651		-17.194		-8.525		-7.033		-4.667		-13.345	-70		-22.273		-13.953		-12.95		-55.354		-10.268		-34.154
	2.174		1.446		-3.583		-0.28		2.798		0.259		-1.379		-1.287	-70		-13.848		-3.368		-4.489		-6.336		-2.853		-17.227		-8.46		-7.095		-4.642		-13.382	-70		-22.313		-13.542		-12.879		-55.592		-10.217		-34.246
	1.845		1.299		-3.278		0.199		2.705		0.298		-1.612		-1.649	-70		-13.762		-3.267		-4.468		-6.119		-2.936		-17.181		-8.428		-7.019		-4.621		-13.492	-70		-22.351		-13.11		-12.829		-55.945		-10.127		-34.243
	1.567		1.19		-2.95		0.612		2.57		0.402		-1.801		-1.966	-70		-13.714		-3.142		-4.45		-5.925		-2.89		-17.084		-8.41		-6.797		-4.592		-13.652	-70		-22.368		-12.703		-12.843		-56.355		-9.981		-34.139
	1.344		1.118		-2.623		0.892		2.439		0.52		-1.919		-2.17	-70		-13.709		-3.018		-4.441		-5.8		-2.739		-16.96		-8.375		-6.447		-4.558		-13.827	-70		-22.351		-12.363		-12.944		-56.754		-9.787		-33.941
	1.163		1.077		-2.319		1.005		2.352		0.615		-1.952		-2.242	-70		-13.736		-2.887		-4.435		-5.782		-2.526		-16.822		-8.299		-6.006		-4.539		-13.986	-70		-22.309		-12.121		-13.128		-57.092		-9.575		-33.661
	1.009		1.066		-2.06		0.969		2.318		0.675		-1.907		-2.206	-70		-13.776		-2.714		-4.422		-5.888		-2.289		-16.683		-8.178		-5.534		-4.562		-14.105	-70		-22.276		-11.989		-13.359		-57.351		-9.395		-33.315
	0.875		1.081		-1.881		0.841		2.318		0.717		-1.815		-2.105	-70		-13.816		-2.462		-4.398		-6.098		-2.052		-16.552		-8.04		-5.096		-4.643		-14.176	-70		-22.293		-11.962		-13.58		-57.539		-9.292		-32.92
	0.762		1.106		-1.817		0.691		2.32		0.76		-1.731		-1.977	-70		-13.847		-2.121		-4.37		-6.357		-1.818		-16.437		-7.927		-4.747		-4.778		-14.206	-70		-22.384		-12.012		-13.738		-57.677		-9.285		-32.507
	0.68		1.118		-1.891		0.571		2.303		0.806		-1.717		-1.838	-70		-13.863		-1.727		-4.358		-6.586		-1.579		-16.345		-7.873		-4.512		-4.95		-14.21	-70		-22.537		-12.101		-13.793		-57.779		-9.354		-32.118
	0.642		1.095		-2.086		0.492		2.259		0.836		-1.82		-1.69	-70		-13.864		-1.355		-4.387		-6.703		-1.333		-16.279		-7.879		-4.384		-5.137		-14.203	-70		-22.704		-12.186		-13.732		-57.843		-9.45		-31.807
	0.66		1.028		-2.346		0.43		2.191		0.814		-2.05		-1.527	-70		-13.849		-1.091		-4.472		-6.659		-1.092		-16.236		-7.918		-4.325		-5.32		-14.188	-70		-22.826		-12.238		-13.568		-57.856		-9.51		-31.626
	0.742		0.93		-2.596		0.339		2.091		0.715		-2.37		-1.35	-70		-13.823		-0.999		-4.613		-6.461		-0.888		-16.207		-7.95		-4.292		-5.483		-14.159	-70		-22.858		-12.243		-13.342		-57.804		-9.484		-31.603
	0.886		0.84		-2.776		0.186		1.939		0.536		-2.703		-1.175	-70		-13.786		-1.101		-4.792		-6.168		-0.764		-16.176		-7.945		-4.253		-5.603		-14.11	-70		-22.791		-12.204		-13.113		-57.69		-9.352		-31.725
	1.076		0.814		-2.867		-0.036		1.707		0.298		-2.963		-1.03	-70		-13.731		-1.371		-4.98		-5.868		-0.756		-16.126		-7.897		-4.203		-5.652		-14.052	-70		-22.648		-12.139		-12.951		-57.53		-9.133		-31.94
	1.286		0.903		-2.889		-0.296		1.373		0.041		-3.087		-0.943	-70		-13.646		-1.749		-5.146		-5.628		-0.878		-16.052		-7.819		-4.159		-5.6		-14.014	-70		-22.471		-12.073		-12.915		-57.35		-8.875		-32.171
	1.484		1.132		-2.885		-0.544		0.941		-0.187		-3.057		-0.934	-70		-13.529		-2.157		-5.265		-5.471		-1.105		-15.963		-7.736		-4.157		-5.429		-14.04	-70		-22.298		-12.036		-13.039		-57.172		-8.638		-32.349
	1.652		1.476		-2.887		-0.727		0.447		-0.343		-2.906		-1.003	-70		-13.397		-2.517		-5.321		-5.373		-1.386		-15.887		-7.669		-4.228		-5.146		-14.153	-70		-22.147		-12.051		-13.321		-57.01		-8.471		-32.438
	1.785		1.866		-2.904		-0.81		-0.041		-0.397		-2.701		-1.131	-70		-13.282		-2.767		-5.306		-5.294		-1.658		-15.847		-7.632		-4.397		-4.786		-14.34	-70		-22.011		-12.131		-13.718		-56.865		-8.399		-32.448
	1.893		2.209		-2.93		-0.783		-0.44		-0.345		-2.517		-1.281	-70		-13.214		-2.867		-5.228		-5.207		-1.874		-15.85		-7.63		-4.664		-4.407		-14.553	-70		-21.865		-12.268		-14.16		-56.73		-8.419		-32.42
	1.988		2.428		-2.951		-0.659		-0.681		-0.201		-2.408		-1.405	-70		-13.199		-2.807		-5.114		-5.11		-2.02		-15.88		-7.656		-5.012		-4.068		-14.731	-70		-21.683		-12.433		-14.569		-56.594		-8.509		-32.404
	2.081		2.487		-2.962		-0.47		-0.732		0.002		-2.397		-1.46	-70		-13.22		-2.601		-5		-5.025		-2.115		-15.914		-7.698		-5.406		-3.809		-14.833	-70		-21.456		-12.579		-14.889		-56.439		-8.632		-32.437
	2.178		2.394		-2.964		-0.251		-0.618		0.228		-2.475		-1.421	-70		-13.242		-2.278		-4.92		-4.978		-2.199		-15.934		-7.75		-5.812		-3.643		-14.858	-70		-21.196		-12.654		-15.092		-56.247		-8.747		-32.524
	2.283		2.189		-2.96		-0.039		-0.411		0.445		-2.614		-1.285	-70		-13.24		-1.879		-4.896		-4.985		-2.297		-15.944		-7.814		-6.21		-3.559		-14.839	-70		-20.928		-12.621		-15.178		-56.007		-8.82		-32.652
	2.395		1.923		-2.958		0.135		-0.207		0.631		-2.792		-1.072	-70		-13.216		-1.442		-4.926		-5.042		-2.409		-15.956		-7.901		-6.595		-3.533		-14.819	-70		-20.684		-12.474		-15.162		-55.717		-8.838		-32.795
	2.491		1.64		-2.973		0.242		-0.08		0.774		-2.993		-0.817	-70		-13.197		-1.007		-4.988		-5.132		-2.502		-15.985		-8.024		-6.965		-3.545		-14.824	-70		-20.489		-12.234		-15.059		-55.39		-8.815		-32.929
	2.524		1.372		-3.022		0.255		-0.049		0.87		-3.21		-0.55	-70		-13.216		-0.609		-5.042		-5.228		-2.542		-16.034		-8.182		-7.299		-3.58		-14.848	-70		-20.361		-11.937		-14.884		-55.051		-8.791		-33.047
	2.427		1.142		-3.124		0.162		-0.076		0.92		-3.436		-0.294	-70		-13.283		-0.276		-5.046		-5.311		-2.517		-16.09		-8.358		-7.553		-3.623		-14.865	-70		-20.303		-11.615		-14.649		-54.736		-8.812		-33.155
	2.145		0.964		-3.289		-0.029		-0.081		0.926		-3.663		-0.059	-70		-13.376		-0.026		-4.966		-5.37		-2.452		-16.129		-8.518		-7.678		-3.657		-14.846	-70		-20.303		-11.291		-14.373		-54.481		-8.909		-33.269
	1.681		0.844		-3.512		-0.283		0.009		0.891		-3.878		0.145	-70		-13.446		0.123		-4.794		-5.401		-2.399		-16.12		-8.632		-7.649		-3.661		-14.779	-70		-20.342		-10.983		-14.073		-54.306		-9.085		-33.401
	1.103		0.776		-3.772		-0.55		0.229		0.813		-4.072		0.312	-70		-13.449		0.155		-4.556		-5.403		-2.406		-16.045		-8.685		-7.483		-3.609		-14.679	-70		-20.394		-10.722		-13.765		-54.209		-9.321		-33.55
	0.521		0.752		-4.048		-0.782		0.555		0.696		-4.229		0.427	-70		-13.374		0.055		-4.301		-5.373		-2.489		-15.909		-8.683		-7.233		-3.49		-14.569	-70		-20.445		-10.542		-13.458		-54.167		-9.582		-33.7
	0.04		0.761		-4.332		-0.949		0.92		0.559		-4.33		0.481	-70		-13.253		-0.179		-4.077		-5.313		-2.623		-15.745		-8.633		-6.963		-3.314		-14.471	-70		-20.496		-10.473		-13.153		-54.152		-9.825		-33.834
	-0.287		0.802		-4.629		-1.051		1.24		0.432		-4.351		0.472	-70		-13.131		-0.525		-3.916		-5.238		-2.752		-15.611		-8.535		-6.715		-3.115		-14.398	-70		-20.554		-10.522		-12.849		-54.153		-10.005		-33.936
	-0.462		0.872		-4.947		-1.104		1.446		0.358		-4.273		0.411	-70		-13.042		-0.933		-3.816		-5.177		-2.817		-15.564		-8.371		-6.509		-2.933		-14.359	-70		-20.623		-10.666		-12.549		-54.182		-10.089		-34.003
	-0.523		0.967		-5.271		-1.13		1.496		0.365		-4.097		0.317	-70		-12.993		-1.338		-3.752		-5.165		-2.787		-15.634		-8.13		-6.351		-2.803		-14.361	-70		-20.689		-10.87		-12.263		-54.255		-10.065		-34.044
	-0.511		1.07		-5.55		-1.141		1.38		0.463		-3.846		0.215	-70		-12.962		-1.682		-3.692		-5.222		-2.672		-15.806		-7.823		-6.248		-2.743		-14.413	-70		-20.722		-11.098		-12.01		-54.377		-9.946		-34.071
	-0.453		1.148		-5.713		-1.133		1.11		0.633		-3.57		0.126	-70		-12.925		-1.928		-3.616		-5.337		-2.523		-16.032		-7.495		-6.213		-2.755		-14.511	-70		-20.687		-11.326		-11.819		-54.526		-9.771		-34.097
	-0.364		1.165		-5.696		-1.087		0.722		0.847		-3.325		0.063	-70		-12.858		-2.071		-3.52		-5.475		-2.406		-16.242		-7.205		-6.246		-2.828		-14.638	-70		-20.575		-11.535		-11.722		-54.657		-9.59		-34.129
	-0.245		1.094		-5.487		-0.987		0.271		1.075		-3.161		0.031	-70		-12.739		-2.129		-3.418		-5.584		-2.369		-16.381		-7.007		-6.334		-2.939		-14.758	-70		-20.407		-11.702		-11.74		-54.721		-9.453		-34.169
	-0.089		0.938		-5.143		-0.831		-0.178		1.301		-3.097		0.025	-70		-12.543		-2.137		-3.327		-5.626		-2.424		-16.415		-6.927		-6.443		-3.053		-14.835	-70		-20.239		-11.802		-11.874		-54.687		-9.399		-34.207
	0.113		0.731		-4.769		-0.638		-0.561		1.52		-3.121		0.035	-70		-12.249		-2.131		-3.267		-5.585		-2.551		-16.342		-6.964		-6.539		-3.134		-14.845	-70		-20.127		-11.826		-12.1		-54.549		-9.443		-34.232
	0.365		0.527		-4.481		-0.445		-0.831		1.731		-3.192		0.041	-70		-11.861		-2.135		-3.26		-5.479		-2.708		-16.183		-7.095		-6.598		-3.173		-14.779	-70		-20.111		-11.792		-12.371		-54.335		-9.576		-34.235
	0.655		0.378		-4.351		-0.298		-0.968		1.919		-3.261		0.023	-70		-11.421		-2.158		-3.323		-5.349		-2.855		-15.975		-7.29		-6.612		-3.198		-14.637	-70		-20.199		-11.738		-12.633		-54.083		-9.772		-34.214
	0.957		0.314		-4.386		-0.232		-0.977		2.059		-3.296		-0.039	-70		-11.009		-2.198		-3.471		-5.24		-2.962		-15.769		-7.522		-6.574		-3.267		-14.425	-70		-20.37		-11.708		-12.834		-53.832		-9.994		-34.18
	1.237		0.337		-4.524		-0.263		-0.876		2.12		-3.292		-0.157	-70		-10.718		-2.25		-3.696		-5.185		-3.009		-15.618		-7.775		-6.475		-3.43		-14.158	-70		-20.582		-11.718		-12.939		-53.603		-10.21		-34.143
	1.465		0.434		-4.664		-0.384		-0.694		2.084		-3.274		-0.321	-70		-10.612		-2.316		-3.965		-5.194		-2.99		-15.567		-8.044		-6.304		-3.698		-13.859	-70		-20.788		-11.752		-12.93		-53.395		-10.394		-34.1
	1.626		0.577		-4.703		-0.57		-0.463		1.952		-3.274		-0.499	-70		-10.702		-2.408		-4.223		-5.262		-2.907		-15.63		-8.325		-6.065		-4.026		-13.557	-70		-20.955		-11.759		-12.818		-53.197		-10.53		-34.033
	1.722		0.742		-4.573		-0.788		-0.208		1.745		-3.315		-0.645	-70		-10.937		-2.537		-4.407		-5.366		-2.773		-15.787		-8.609		-5.788		-4.334		-13.283	-70		-21.078		-11.684		-12.637		-52.999		-10.612		-33.914
	1.762		0.9		-4.262		-0.997		0.054		1.502		-3.397		-0.717	-70		-11.218		-2.706		-4.473		-5.479		-2.609		-15.985		-8.867		-5.521		-4.539		-13.062	-70		-21.19		-11.498		-12.432		-52.803		-10.641		-33.729
	1.756		1.016		-3.819		-1.161		0.318		1.269		-3.507		-0.7	-70		-11.44		-2.899		-4.412		-5.563		-2.442		-16.168		-9.056		-5.307		-4.6		-12.91	-70		-21.34		-11.213		-12.242		-52.629		-10.625		-33.487
	1.7		1.055		-3.341		-1.245		0.584		1.099		-3.632		-0.613	-70		-11.53		-3.085		-4.251		-5.578		-2.305		-16.293		-9.136		-5.161		-4.531		-12.837	-70		-21.559		-10.888		-12.091		-52.514		-10.577		-33.219
	1.581		0.998		-2.934		-1.224		0.841		1.032		-3.768		-0.501	-70		-11.474		-3.228		-4.046		-5.479		-2.229		-16.35		-9.086		-5.065		-4.395		-12.845	-70		-21.83		-10.603		-11.981		-52.493		-10.498		-32.971
	1.378		0.859		-2.686		-1.09		1.069		1.091		-3.923		-0.413	-70		-11.323		-3.304		-3.857		-5.239		-2.241		-16.355		-8.921		-4.978		-4.276		-12.925	-70		-22.091		-10.423		-11.903		-52.582		-10.382		-32.78
	1.074		0.681		-2.629		-0.855		1.242		1.265		-4.1		-0.385	-70		-11.166		-3.305		-3.724		-4.852		-2.349		-16.33		-8.679		-4.861		-4.236		-13.053	-70		-22.26		-10.376		-11.847		-52.771		-10.214		-32.663
	0.665		0.517		-2.74		-0.551		1.329		1.508		-4.289		-0.426	-70		-11.09		-3.233		-3.654		-4.341		-2.538		-16.291		-8.412		-4.703		-4.291		-13.192	-70		-22.279		-10.443		-11.812		-53.021		-9.984		-32.613
[truncated: 40 more columns]

## Sheet: Figure 2d
Three pairs of cone-cb2 bipolar cell responses
interpoint interval = 60 µs
cb2_1_(pA)	cone_1_(pA)	cone_1_(mV)	cb2_2	cone_2	cb2_3	cone_3	cone_2&3_(mV)
-0.961	0.362	-70	0.091	-0.592	0.125	-0.171	-70
-1.03	0.366	-70	0.132	-0.637	0.177	-0.162	-70
-0.938	0.34	-70	0.207	-0.658	0.328	-0.157	-70
-0.729	0.284	-70	0.315	-0.65	0.516	-0.165	-70
-0.457	0.201	-70	0.428	-0.615	0.613	-0.197	-70
-0.159	0.1	-70	0.519	-0.555	0.53	-0.259	-70
0.125	-0.004	-70	0.561	-0.477	0.294	-0.356	-70
0.335	-0.095	-70	0.527	-0.387	0.022	-0.487	-70
0.417	-0.158	-70	0.408	-0.292	-0.143	-0.644	-70
0.365	-0.18	-70	0.233	-0.2	-0.128	-0.818	-70
0.22	-0.156	-70	0.062	-0.114	0.015	-0.997	-70
0.054	-0.083	-70	-0.075	-0.037	0.145	-1.17	-70
-0.06	0.032	-70	-0.214	0.03	0.166	-1.326	-70
-0.072	0.18	-70	-0.406	0.089	0.132	-1.456	-70
0.036	0.348	-70	-0.636	0.14	0.186	-1.557	-70
0.229	0.524	-70	-0.819	0.184	0.388	-1.627	-70
0.386	0.694	-70	-0.89	0.222	0.638	-1.671	-70
0.336	0.847	-70	-0.854	0.252	0.748	-1.698	-70
-0.023	0.973	-70	-0.76	0.274	0.606	-1.717	-70
-0.611	1.063	-70	-0.632	0.285	0.245	-1.739	-70
-1.184	1.111	-70	-0.465	0.282	-0.217	-1.773	-70
-1.501	1.112	-70	-0.274	0.263	-0.656	-1.822	-70
-1.477	1.063	-70	-0.099	0.226	-0.972	-1.883	-70
-1.204	0.964	-70	0.023	0.171	-1.1	-1.946	-70
-0.835	0.821	-70	0.1	0.1	-1.036	-1.996	-70
-0.445	0.641	-70	0.178	0.016	-0.856	-2.012	-70
-0.001	0.439	-70	0.301	-0.078	-0.686	-1.974	-70
0.552	0.231	-70	0.49	-0.177	-0.621	-1.869	-70
1.179	0.034	-70	0.758	-0.278	-0.662	-1.69	-70
1.727	-0.133	-70	1.116	-0.381	-0.718	-1.442	-70
2.015	-0.256	-70	1.539	-0.484	-0.664	-1.14	-70
1.947	-0.327	-70	1.92	-0.583	-0.443	-0.806	-70
1.571	-0.34	-70	2.086	-0.675	-0.11	-0.468	-70
1.054	-0.298	-70	1.9	-0.753	0.23	-0.15	-70
0.616	-0.208	-70	1.378	-0.81	0.527	0.126	-70
0.414	-0.081	-70	0.707	-0.84	0.797	0.345	-70
0.451	0.07	-70	0.113	-0.836	1.059	0.501	-70
0.59	0.232	-70	-0.281	-0.798	1.291	0.593	-70
0.685	0.389	-70	-0.503	-0.728	1.434	0.626	-70
0.688	0.529	-70	-0.651	-0.632	1.436	0.611	-70
0.647	0.641	-70	-0.769	-0.521	1.278	0.555	-70
0.641	0.716	-70	-0.797	-0.403	0.986	0.469	-70
0.713	0.751	-70	-0.635	-0.289	0.6	0.361	-70
0.859	0.745	-70	-0.256	-0.183	0.134	0.238	-70
1.034	0.702	-70	0.246	-0.09	-0.405	0.104	-70
1.165	0.632	-70	0.714	-0.01	-0.941	-0.033	-70
1.167	0.547	-70	1.012	0.061	-1.316	-0.167	-70
0.974	0.464	-70	1.073	0.127	-1.398	-0.292	-70
0.583	0.399	-70	0.894	0.194	-1.194	-0.404	-70
0.07	0.367	-70	0.542	0.269	-0.848	-0.498	-70
-0.441	0.379	-70	0.157	0.357	-0.542	-0.577	-70
-0.837	0.437	-70	-0.111	0.462	-0.401	-0.646	-70
-1.034	0.539	-70	-0.204	0.583	-0.444	-0.71	-70
-0.991	0.673	-70	-0.184	0.719	-0.571	-0.777	-70
-0.741	0.825	-70	-0.13	0.866	-0.612	-0.853	-70
-0.395	0.978	-70	-0.042	1.015	-0.44	-0.939	-70
-0.073	1.115	-70	0.12	1.158	-0.074	-1.034	-70
0.182	1.222	-70	0.34	1.285	0.337	-1.131	-70
0.401	1.289	-70	0.555	1.384	0.63	-1.222	-70
0.607	1.31	-70	0.723	1.448	0.725	-1.295	-70
0.787	1.286	-70	0.847	1.471	0.649	-1.342	-70
0.932	1.221	-70	0.903	1.449	0.483	-1.354	-70
1.06	1.124	-70	0.829	1.386	0.309	-1.326	-70
1.172	1.009	-70	0.589	1.285	0.181	-1.259	-70
1.218	0.891	-70	0.245	1.154	0.116	-1.157	-70
1.144	0.785	-70	-0.073	1.002	0.086	-1.028	-70
0.943	0.703	-70	-0.264	0.837	0.055	-0.881	-70
0.665	0.653	-70	-0.323	0.669	0.008	-0.721	-70
0.368	0.635	-70	-0.329	0.504	-0.045	-0.553	-70
0.085	0.644	-70	-0.351	0.349	-0.097	-0.38	-70
-0.165	0.67	-70	-0.401	0.208	-0.155	-0.201	-70
-0.359	0.697	-70	-0.453	0.087	-0.191	-0.017	-70
-0.463	0.712	-70	-0.504	-0.013	-0.139	0.169	-70
-0.456	0.702	-70	-0.578	-0.092	0.015	0.354	-70
-0.362	0.656	-70	-0.661	-0.152	0.168	0.534	-70
-0.263	0.567	-70	-0.673	-0.199	0.167	0.706	-70
-0.246	0.432	-70	-0.535	-0.238	-0.04	0.869	-70
-0.335	0.252	-70	-0.265	-0.275	-0.35	1.024	-70
-0.468	0.031	-70	0.002	-0.312	-0.609	1.171	-70
-0.555	-0.221	-70	0.133	-0.351	-0.723	1.315	-70
-0.57	-0.49	-70	0.096	-0.389	-0.682	1.454	-70
-0.568	-0.76	-70	-0.071	-0.422	-0.506	1.588	-70
-0.619	-1.013	-70	-0.351	-0.446	-0.218	1.71	-70
-0.725	-1.232	-70	-0.725	-0.456	0.145	1.814	-70
-0.803	-1.405	-70	-1.094	-0.451	0.525	1.891	-70
-0.772	-1.523	-70	-1.283	-0.433	0.849	1.935	-70
-0.638	-1.584	-70	-1.18	-0.406	1.031	1.939	-70
-0.493	-1.592	-70	-0.834	-0.378	0.992	1.903	-70
-0.464	-1.553	-70	-0.409	-0.36	0.712	1.831	-70
-0.634	-1.476	-70	-0.066	-0.36	0.267	1.73	-70
-0.985	-1.37	-70	0.116	-0.385	-0.218	1.614	-70
-1.397	-1.244	-70	0.14	-0.438	-0.64	1.495	-70
-1.712	-1.106	-70	0.067	-0.517	-0.921	1.39	-70
-1.822	-0.959	-70	-0.031	-0.612	-0.97	1.31	-70
-1.729	-0.811	-70	-0.101	-0.711	-0.718	1.264	-70
-1.535	-0.667	-70	-0.109	-0.796	-0.211	1.255	-70
-1.372	-0.531	-70	-0.023	-0.852	0.367	1.281	-70
-1.314	-0.409	-70	0.134	-0.867	0.794	1.336	-70
-1.335	-0.302	-70	0.254	-0.832	0.942	1.412	-70
-1.334	-0.213	-70	0.205	-0.749	0.826	1.502	-70
-1.205	-0.139	-70	-0.03	-0.623	0.577	1.596	-70
-0.901	-0.079	-70	-0.331	-0.466	0.356	1.686	-70
-0.473	-0.03	-70	-0.544	-0.293	0.28	1.765	-70
-0.055	0.005	-70	-0.611	-0.119	0.345	1.824	-70
0.206	0.024	-70	-0.591	0.041	0.431	1.854	-70
0.249	0.017	-70	-0.574	0.177	0.404	1.846	-70
0.135	-0.026	-70	-0.598	0.283	0.216	1.792	-70
0	-0.113	-70	-0.633	0.358	-0.068	1.686	-70
-0.045	-0.252	-70	-0.635	0.402	-0.345	1.529	-70
0.027	-0.44	-70	-0.585	0.422	-0.55	1.325	-70
0.168	-0.669	-70	-0.497	0.423	-0.67	1.084	-70
0.312	-0.923	-70	-0.409	0.412	-0.731	0.824	-70
0.438	-1.182	-70	-0.368	0.396	-0.772	0.561	-70
0.58	-1.424	-70	-0.386	0.379	-0.821	0.316	-70
0.774	-1.63	-70	-0.395	0.364	-0.872	0.106	-70
1.01	-1.786	-70	-0.283	0.355	-0.867	-0.058	-70
1.238	-1.885	-70	-0.007	0.352	-0.72	-0.171	-70
1.406	-1.926	-70	0.339	0.356	-0.39	-0.237	-70
1.474	-1.912	-70	0.588	0.366	0.063	-0.266	-70
1.397	-1.851	-70	0.647	0.38	0.506	-0.272	-70
1.163	-1.749	-70	0.558	0.395	0.822	-0.273	-70
0.848	-1.612	-70	0.436	0.408	0.963	-0.285	-70
0.618	-1.443	-70	0.365	0.418	0.941	-0.321	-70
0.614	-1.242	-70	0.389	0.424	0.797	-0.393	-70
0.83	-1.01	-70	0.528	0.427	0.597	-0.505	-70
1.098	-0.75	-70	0.762	0.429	0.422	-0.659	-70
1.197	-0.469	-70	0.991	0.432	0.313	-0.851	-70
0.995	-0.177	-70	1.085	0.436	0.224	-1.075	-70
0.528	0.113	-35	1.007	0.442	0.087	-1.319	-30
-0.007		-35	0.861		-0.061		-30
-0.381		-35	0.802		-0.087		-30
-0.489		-35	0.872		0.082		-30
-0.399		-35	0.963		0.349		-30
-0.248		-35	0.923		0.557		-30
-0.131		-35	0.695		0.638		-30
-0.092		-35	0.346		0.616		-30
-0.166		-35	-0.038		0.518		-30
-0.373		-35	-0.414		0.362		-30
-0.679		-35	-0.768		0.198		-30
-0.987		-35	-1.077		0.105		-30
-1.185		-35	-1.303		0.105		-30
-1.18		-35	-1.41		0.118		-30
-0.919		-35	-1.37		0.019		-30
-0.441		-35	-1.206		-0.248		-30
0.067		-70	-1.033		-0.64		-30
0.323		-70	-1.022		-1.06		-30
0.147		-70	-1.259		-1.401		-70
-0.38		-70	-1.625		-1.568		-70
-0.979		-70	-1.864		-1.525		-70
-1.403		-70	-1.799		-1.34		-70
-1.58		-70	-1.471		-1.159		-70
-1.546		-70	-1.08		-1.109		-70
-1.365		-70	-0.847		-1.239		-70
-1.159		-70	-0.952		-1.545		-70
-1.171		-70	-1.526		-2.035		-70
-1.672		-70	-2.598		-2.758		-70
-2.737		-70	-4.016		-3.766		-70
-4.118		-70	-5.443		-5.04		-70
-5.396		-70	-6.511		-6.416		-70
-6.266		-70	-7.011		-7.6		-70
-6.707		-70	-6.978		-8.282		-70
-6.895		-70	-6.622		-8.308		-70
-6.984		-70	-6.191		-7.752		-70
-6.967	-8.572	-70	-5.843	-14.644	-6.846	-16.684	-70
-6.741	-8.717	-70	-5.599	-14.105	-5.858	-16.11	-70
-6.284	-8.779	-70	-5.378	-13.466	-4.991	-15.41	-70
-5.709	-8.765	-70	-5.091	-12.779	-4.339	-14.63	-70
-5.13	-8.683	-70	-4.723	-12.095	-3.855	-13.817	-70
-4.559	-8.543	-70	-4.329	-11.457	-3.404	-13.012	-70
-3.954	-8.359	-70	-3.974	-10.894	-2.875	-12.248	-70
-3.329	-8.144	-70	-3.688	-10.422	-2.288	-11.548	-70
-2.773	-7.914	-70	-3.469	-10.046	-1.76	-10.93	-70
-2.375	-7.684	-70	-3.291	-9.762	-1.37	-10.399	-70
-2.163	-7.47	-70	-3.094	-9.556	-1.081	-9.958	-70
-2.102	-7.288	-70	-2.804	-9.413	-0.814	-9.604	-70
-2.112	-7.15	-70	-2.399	-9.314	-0.555	-9.331	-70
-2.071	-7.066	-70	-1.961	-9.243	-0.372	-9.132	-70
-1.857	-7.039	-70	-1.615	-9.183	-0.328	-9	-70
-1.431	-7.069	-70	-1.435	-9.123	-0.397	-8.929	-70
-0.9	-7.145	-70	-1.403	-9.058	-0.473	-8.914	-70
-0.463	-7.255	-70	-1.46	-8.986	-0.454	-8.952	-70
-0.243	-7.382	-70	-1.559	-8.911	-0.329	-9.038	-70
-0.193	-7.507	-70	-1.665	-8.839	-0.199	-9.167	-70
-0.172	-7.613	-70	-1.745	-8.777	-0.198	-9.331	-70
-0.099	-7.688	-70	-1.777	-8.729	-0.385	-9.516	-70
-0.006	-7.725	-70	-1.759	-8.7	-0.673	-9.709	-70
0.035	-7.721	-70	-1.701	-8.689	-0.891	-9.891	-70
0.032	-7.682	-70	-1.61	-8.695	-0.914	-10.045	-70
0.09	-7.615	-70	-1.478	-8.714	-0.75	-10.158	-70
0.288	-7.531	-70	-1.285	-8.743	-0.508	-10.224	-70
0.544	-7.442	-70	-1.033	-8.774	-0.292	-10.244	-70
0.646	-7.357	-70	-0.778	-8.805	-0.134	-10.229	-70
0.453	-7.285	-70	-0.591	-8.83	-0.025	-10.197	-70
0.064	-7.23	-70	-0.492	-8.847	0.016	-10.169	-70
-0.262	-7.197	-70	-0.427	-8.851	-0.023	-10.164	-70
-0.339	-7.191	-70	-0.31	-8.841	-0.072	-10.194	-70
-0.212	-7.215	-70	-0.106	-8.814	0.006	-10.264	-70
-0.079	-7.274	-70	0.145	-8.771	0.272	-10.37	-70
-0.09	-7.37	-70	0.367	-8.714	0.641	-10.499	-70
-0.226	-7.502	-70	0.521	-8.647	0.96	-10.632	-70
-0.362	-7.664	-70	0.633	-8.577	1.13	-10.749	-70
-0.393	-7.842	-70	0.751	-8.513	1.139	-10.83	-70
-0.306	-8.02	-70	0.886	-8.466	1.026	-10.86	-70
-0.153	-8.178	-70	0.987	-8.445	0.843	-10.833	-70
0.012	-8.299	-70	0.962	-8.457	0.632	-10.748	-70
0.165	-8.37	-70	0.742	-8.502	0.411	-10.613	-70
0.286	-8.388	-70	0.347	-8.579	0.201	-10.443	-70
0.331	-8.356	-70	-0.12	-8.682	0.05	-10.257	-70
0.266	-8.287	-70	-0.537	-8.802	0.006	-10.074	-70
0.114	-8.196	-70	-0.833	-8.932	0.056	-9.912	-70
-0.046	-8.103	-70	-1.001	-9.064	0.128	-9.784	-70
-0.138	-8.025	-70	-1.065	-9.195	0.165	-9.699	-70
-0.12	-7.975	-70	-1.067	-9.319	0.185	-9.661	-70
0.022	-7.962	-70	-1.063	-9.435	0.266	-9.668	-70
0.266	-7.987	-70	-1.084	-9.537	0.45	-9.714	-70
0.527	-8.045	-70	-1.078	-9.623	0.669	-9.793	-70
0.681	-8.127	-70	-0.922	-9.688	0.78	-9.894	-70
0.68	-8.219	-70	-0.53	-9.731	0.717	-10.006	-70
0.623	-8.307	-70	0.032	-9.753	0.593	-10.116	-70
0.67	-8.378	-70	0.556	-9.754	0.622	-10.21	-70
0.856	-8.421	-70	0.837	-9.739	0.908	-10.278	-70
1.022	-8.427	-70	0.836	-9.713	1.321	-10.31	-70
0.965	-8.396	-70	0.727	-9.677	1.597	-10.302	-70
0.65	-8.33	-70	0.748	-9.635	1.554	-10.255	-70
0.249	-8.234	-70	0.996	-9.587	1.202	-10.175	-70
-0.023	-8.12	-70	1.341	-9.532	0.681	-10.071	-70
-0.095	-8.001	-70	1.553	-9.471	0.148	-9.954	-70
-0.061	-7.891	-70	1.489	-9.404	-0.281	-9.835	-70
-0.061	-7.802	-70	1.184	-9.336	-0.552	-9.723	-70
-0.155	-7.745	-70	0.799	-9.272	-0.683	-9.626	-70
-0.308	-7.722	-70	0.498	-9.216	-0.754	-9.548	-70
-0.438	-7.731	-70	0.334	-9.174	-0.863	-9.493	-70
-0.479	-7.761	-70	0.239	-9.149	-1.069	-9.461	-70
-0.427	-7.797	-70	0.11	-9.141	-1.36	-9.45	-70
-0.346	-7.824	-70	-0.062	-9.15	-1.657	-9.457	-70
-0.285	-7.83	-70	-0.184	-9.175	-1.855	-9.48	-70
-0.203	-7.808	-70	-0.162	-9.215	-1.857	-9.517	-70
0.005	-7.762	-70	-0.007	-9.268	-1.593	-9.567	-70
0.379	-7.704	-70	0.167	-9.333	-1.07	-9.631	-70
0.837	-7.651	-70	0.26	-9.408	-0.424	-9.71	-70
1.264	-7.625	-70	0.259	-9.493	0.114	-9.803	-70
1.59	-7.641	-70	0.208	-9.584	0.38	-9.908	-70
1.781	-7.707	-70	0.129	-9.678	0.383	-10.019	-70
1.775	-7.824	-70	0.003	-9.773	0.257	-10.126	-70
1.503	-7.98	-70	-0.175	-9.866	0.103	-10.22	-70
0.965	-8.157	-70	-0.36	-9.953	-0.072	-10.291	-70
0.277	-8.332	-70	-0.486	-10.033	-0.272	-10.332	-70
-0.362	-8.484	-70	-0.52	-10.099	-0.442	-10.341	-70
-0.776	-8.596	-70	-0.463	-10.146	-0.52	-10.322	-70
-0.896	-8.659	-70	-0.316	-10.167	-0.537	-10.283	-70
-0.791	-8.672	-70	-0.086	-10.155	-0.606	-10.238	-70
-0.611	-8.639	-70	0.178	-10.108	-0.776	-10.202	-70
-0.497	-8.572	-70	0.38	-10.022	-0.943	-10.189	-70
-0.521	-8.484	-70	0.44	-9.902	-0.94	-10.208	-70
-0.677	-8.392	-70	0.368	-9.752	-0.701	-10.264	-70
-0.922	-8.307	-70	0.238	-9.581	-0.329	-10.352	-70
-1.2	-8.243	-70	0.099	-9.397	0.002	-10.466	-70
-1.446	-8.208	-70	-0.074	-9.209	0.189	-10.593	-70
-1.584	-8.211	-70	-0.332	-9.024	0.274	-10.718	-70
-1.567	-8.257	-70	-0.698	-8.846	0.371	-10.831	-70
-1.417	-8.346	-70	-1.155	-8.68	0.547	-10.922	-70
-1.215	-8.476	-70	-1.649	-8.526	0.765	-10.985	-70
-1.035	-8.643	-70	-2.075	-8.386	0.95	-11.019	-70
-0.876	-8.834	-70	-2.308	-8.26	1.074	-11.028	-70
-0.698	-9.038	-70	-2.282	-8.148	1.143	-11.017	-70
-0.497	-9.241	-70	-2.062	-8.05	1.143	-10.994	-70
-0.342	-9.431	-70	-1.799	-7.967	1.042	-10.968	-70
-0.331	-9.599	-70	-1.623	-7.897	0.829	-10.946	-70
-0.517	-9.741	-70	-1.547	-7.842	0.549	-10.933	-70
-0.854	-9.854	-70	-1.475	-7.801	0.281	-10.932	-70
-1.207	-9.938	-70	-1.282	-7.777	0.092	-10.945	-70
-1.428	-9.991	-70	-0.905	-7.771	-0.02	-10.967	-70
-1.445	-10.012	-70	-0.377	-7.786	-0.115	-10.994	-70
-1.304	-9.999	-70	0.186	-7.825	-0.228	-11.02	-70
-1.115	-9.949	-70	0.636	-7.892	-0.322	-11.037	-70
-0.944	-9.864	-70	0.854	-7.988	-0.345	-11.035	-70
-0.773	-9.753	-70	0.825	-8.116	-0.326	-11.006	-70
-0.554	-9.627	-70	0.652	-8.279	-0.369	-10.943	-70
-0.284	-9.506	-70	0.478	-8.479	-0.543	-10.843	-70
0.003	-9.409	-70	0.381	-8.718	-0.819	-10.706	-70
0.294	-9.353	-70	0.332	-8.995	-1.12	-10.542	-70
0.605	-9.35	-70	0.251	-9.31	-1.385	-10.361	-70
0.951	-9.405	-70	0.081	-9.658	-1.567	-10.18	-70
1.31	-9.511	-70	-0.17	-10.027	-1.597	-10.019	-70
1.611	-9.655	-70	-0.434	-10.405	-1.414	-9.893	-70
1.737	-9.815	-70	-0.625	-10.774	-1.029	-9.815	-70
1.61	-9.969	-70	-0.711	-11.113	-0.553	-9.79	-70
1.281	-10.095	-70	-0.735	-11.405	-0.124	-9.816	-70
0.918	-10.174	-70	-0.755	-11.63	0.196	-9.884	-70
0.651	-10.196	-70	-0.767	-11.777	0.45	-9.98	-70
0.465	-10.157	-70	-0.721	-11.838	0.717	-10.089	-70
0.26	-10.058	-70	-0.603	-11.813	1.011	-10.196	-70
-0.015	-9.909	-70	-0.466	-11.707	1.249	-10.291	-70
-0.314	-9.722	-70	-0.379	-11.53	1.333	-10.369	-70
-0.567	-9.511	-70	-0.373	-11.296	1.255	-10.427	-70
-0.739	-9.291	-70	-0.416	-11.021	1.097	-10.47	-70
-0.834	-9.078	-70	-0.438	-10.723	0.935	-10.502	-70
-0.872	-8.883	-70	-0.374	-10.421	0.762	-10.529	-70
-0.89	-8.717	-70	-0.209	-10.131	0.509	-10.556	-70
-0.942	-8.584	-70	0.023	-9.868	0.14	-10.588	-70
-1.054	-8.488	-70	0.257	-9.645	-0.274	-10.627	-70
-1.203	-8.427	-70	0.4	-9.47	-0.566	-10.672	-70
-1.344	-8.399	-70	0.339	-9.345	-0.598	-10.721	-70
-1.447	-8.403	-70	-0.024	-9.268	-0.383	-10.771	-70
-1.493	-8.441	-70	-0.677	-9.232	-0.077	-10.817	-70
-1.447	-8.517	-70	-1.44	-9.224	0.159	-10.853	-70
-1.267	-8.636	-70	-2.024	-9.231	0.27	-10.874	-70
-0.956	-8.802	-70	-2.198	-9.24	0.3	-10.877	-70
-0.585	-9.015	-70	-1.948	-9.239	0.301	-10.858	-70
-0.256	-9.27	-70	-1.477	-9.225	0.278	-10.818	-70
-0.045	-9.551	-70	-1.047	-9.199	0.202	-10.759	-70
0.052	-9.841	-70	-0.8	-9.169	0.037	-10.686	-70
0.107	-10.117	-70	-0.693	-9.145	-0.216	-10.606	-70
0.198	-10.359	-70	-0.578	-9.138	-0.486	-10.526	-70
0.339	-10.552	-70	-0.345	-9.156	-0.648	-10.456	-70
0.456	-10.689	-70	-0.006	-9.203	-0.6	-10.402	-70
0.445	-10.773	-70	0.33	-9.276	-0.364	-10.368	-70
0.256	-10.815	-70	0.539	-9.367	-0.073	-10.354	-70
-0.068	-10.83	-70	0.569	-9.467	0.147	-10.359	-70
-0.405	-10.836	-70	0.452	-9.566	0.287	-10.374	-70
-0.631	-10.846	-70	0.263	-9.658	0.429	-10.396	-70
-0.701	-10.868	-70	0.08	-9.738	0.617	-10.416	-70
-0.67	-10.901	-70	-0.028	-9.806	0.777	-10.431	-70
-0.615	-10.936	-70	-0.023	-9.864	0.778	-10.44	-70
-0.558	-10.956	-70	0.061	-9.915	0.56	-10.444	-70
-0.466	-10.942	-70	0.132	-9.961	0.197	-10.443	-70
-0.324	-10.874	-70	0.117	-10.002	-0.163	-10.439	-70
-0.167	-10.735	-70	0.019	-10.034	-0.417	-10.434	-70
-0.053	-10.518	-70	-0.121	-10.057	-0.556	-10.427	-70
-0.002	-10.223	-70	-0.283	-10.068	-0.625	-10.417	-70
0.019	-9.864	-70	-0.466	-10.067	-0.669	-10.398	-70
0.043	-9.463	-70	-0.638	-10.056	-0.717	-10.37	-70
0.043	-9.05	-70	-0.735	-10.038	-0.784	-10.327	-70
-0.049	-8.659	-70	-0.705	-10.016	-0.849	-10.269	-70
-0.239	-8.321	-70	-0.539	-9.994	-0.841	-10.196	-70
-0.417	-8.064	-70	-0.257	-9.974	-0.682	-10.111	-70
-0.443	-7.902	-70	0.12	-9.954	-0.371	-10.02	-70
-0.31	-7.837	-70	0.566	-9.936	-0.017	-9.933	-70
-0.177	-7.858	-70	1.025	-9.916	0.228	-9.861	-70
-0.23	-7.941	-70	1.406	-9.894	0.288	-9.814	-70
-0.512	-8.059	-70	1.617	-9.867	0.216	-9.801	-70
-0.898	-8.183	-70	1.603	-9.837	0.128	-9.827	-70
-1.211	-8.289	-70	1.363	-9.802	0.099	-9.894	-70
-1.333	-8.364	-70	0.975	-9.765	0.119	-9.999	-70
-1.246	-8.403	-70	0.578	-9.729	0.124	-10.134	-70
-1.01	-8.411	-70	0.293	-9.697	0.069	-10.294	-70
-0.743	-8.399	-70	0.14	-9.672	-0.013	-10.47	-70
-0.56	-8.38	-70	0.053	-9.658	-0.02	-10.653	-70
-0.512	-8.365	-70	-0.042	-9.656	0.141	-10.834	-70
-0.572	-8.362	-70	-0.162	-9.669	0.462	-11.006	-70
-0.684	-8.376	-70	-0.28	-9.693	0.836	-11.159	-70
-0.816	-8.408	-70	-0.366	-9.727	1.147	-11.285	-70
-0.955	-8.46	-70	-0.424	-9.763	1.342	-11.376	-70
-1.084	-8.529	-70	-0.501	-9.798	1.426	-11.428	-70
-1.177	-8.617	-70	-0.654	-9.823	1.386	-11.44	-70
-1.221	-8.724	-70	-0.872	-9.835	1.19	-11.417	-70
-1.221	-8.851	-70	-1.068	-9.83	0.84	-11.367	-70
-1.185	-8.999	-70	-1.161	-9.811	0.391	-11.302	-70
-1.095	-9.166	-70	-1.163	-9.779	-0.082	-11.236	-70
-0.929	-9.35	-70	-1.15	-9.742	-0.502	-11.182	-70
-0.711	-9.545	-70	-1.151	-9.706	-0.781	-11.149	-70
-0.508	-9.743	-70	-1.114	-9.68	-0.868	-11.142	-70
-0.374	-9.935	-70	-0.993	-9.671	-0.808	-11.159	-70
-0.305	-10.111	-70	-0.823	-9.686	-0.702	-11.194	-70
-0.264	-10.263	-70	-0.67	-9.728	-0.578	-11.236	-70
-0.22	-10.382	-70	-0.541	-9.798	-0.336	-11.273	-70
-0.146	-10.462	-70	-0.364	-9.895	0.138	-11.294	-70
-0.022	-10.5	-70	-0.061	-10.012	0.802	-11.289	-70

## Sheet: Figure 2e
interpoint interval = 60 µs																														Histogram
step: -70 to -30 mV
cone_231	cone_233	cone_235	cone_237	cone_239	cone_241	cone_243	cone_245	cone_247	cone_249	cone_251	cone_253	cone_255	cone_257	cone_259	cone_261	cone_263	cone_265	cone_267	cone_269	cone_271	cone_273	cone_275	cone_277	cone_279	cone_281	cone_283	cone_285	mV		bin start (pA)	events		Sum of Gaussian fit parameters
0.079	0.03	-0.315	-0.083	0.687	0.412	-0.033	0.571	0.561	-0.484	0.579	0.542	0.12	-0.339	-0.187	0.324	0.028	-0.595	0.436	0.784	0.664	0.925	-0.424	-0.186	-1.389	-1.597	-0.734	-1.002	-70		-10.2	0		Amplitude 0	0.8899
0.113	0.113	-0.235	0.002	0.887	0.561	-0.127	0.615	0.718	-0.577	0.586	0.675	-0.008	-0.35	-0.199	0.465	-0.064	-0.529	0.619	1.005	0.832	1.266	-0.575	-0.152	-1.532	-1.836	-0.781	-1.152	-70		-9.2	0		Amplitude 1	1.8716
0.153	0.203	-0.102	0.147	1.052	0.706	-0.25	0.593	0.867	-0.585	0.504	0.759	-0.153	-0.316	-0.222	0.597	-0.173	-0.401	0.774	1.205	0.99	1.595	-0.699	-0.109	-1.573	-1.981	-0.721	-1.23	-70		-8.2	0		Amplitude 2	1.1978
0.204	0.286	0.031	0.348	1.156	0.838	-0.376	0.515	0.981	-0.491	0.333	0.774	-0.266	-0.251	-0.288	0.687	-0.266	-0.258	0.844	1.346	1.142	1.855	-0.78	-0.071	-1.53	-2.041	-0.57	-1.222	-70		-7.2	0		Amplitude 3	0.5002
0.277	0.351	0.103	0.59	1.183	0.952	-0.477	0.412	1.031	-0.32	0.093	0.728	-0.308	-0.193	-0.418	0.702	-0.311	-0.151	0.782	1.395	1.288	1.998	-0.823	-0.038	-1.434	-2.039	-0.378	-1.125	-70		-6.2	0		Amplitude 4	0.5151
0.383	0.395	0.069	0.845	1.126	1.044	-0.538	0.33	0.999	-0.126	-0.182	0.648	-0.268	-0.185	-0.61	0.633	-0.294	-0.118	0.584	1.336	1.415	1.995	-0.859	0.005	-1.31	-1.991	-0.201	-0.958	-70		-5.2	0		Amplitude 5	0.0638
0.525	0.417	-0.072	1.081	0.982	1.108	-0.567	0.307	0.882	0.031	-0.458	0.568	-0.169	-0.258	-0.827	0.497	-0.222	-0.171	0.29	1.179	1.501	1.851	-0.936	0.072	-1.16	-1.89	-0.076	-0.753	-70		-4.2	0		Amplitude 6	0.0108
0.699	0.408	-0.291	1.266	0.755	1.13	-0.589	0.365	0.697	0.113	-0.706	0.509	-0.059	-0.407	-1.013	0.333	-0.121	-0.292	-0.029	0.953	1.524	1.606	-1.096	0.173	-0.97	-1.728	-0.001	-0.555	-70		-3.2	0		s noise	1.3037
0.889	0.348	-0.543	1.368	0.46	1.092	-0.633	0.503	0.465	0.115	-0.918	0.472	0.011	-0.602	-1.118	0.18	-0.018	-0.444	-0.302	0.696	1.486	1.32	-1.355	0.296	-0.729	-1.517	0.055	-0.398	-70		-2.2	0		s peak	1.5076
1.077	0.216	-0.801	1.367	0.126	0.981	-0.708	0.702	0.206	0.062	-1.092	0.441	0.01	-0.8	-1.125	0.059	0.066	-0.576	-0.479	0.442	1.412	1.058	-1.691	0.42	-0.445	-1.295	0.125	-0.295	-70		-1.2	2		mean ampl.	10.561
1.253	0.005	-1.053	1.26	-0.206	0.796	-0.807	0.943	-0.07	-0.009	-1.23	0.404	-0.069	-0.969	-1.046	-0.03	0.127	-0.649	-0.548	0.206	1.339	0.854	-2.041	0.525	-0.146	-1.108	0.219	-0.233	-70		-0.2	1
1.415	-0.263	-1.296	1.063	-0.495	0.547	-0.908	1.204	-0.35	-0.068	-1.328	0.358	-0.202	-1.105	-0.917	-0.102	0.173	-0.642	-0.522	-0.009	1.301	0.705	-2.325	0.61	0.133	-0.98	0.324	-0.185	-70		0.8	0
1.571	-0.547	-1.52	0.817	-0.715	0.256	-0.989	1.466	-0.611	-0.105	-1.374	0.315	-0.35	-1.222	-0.766	-0.177	0.218	-0.566	-0.433	-0.2	1.311	0.575	-2.472	0.692	0.367	-0.891	0.411	-0.124	-70		1.8	0
1.723	-0.798	-1.702	0.573	-0.853	-0.051	-1.04	1.705	-0.822	-0.132	-1.362	0.288	-0.468	-1.341	-0.605	-0.267	0.269	-0.454	-0.324	-0.357	1.364	0.427	-2.445	0.798	0.55	-0.795	0.466	-0.038	-70		2.8	0
1.857	-0.985	-1.82	0.374	-0.911	-0.341	-1.059	1.894	-0.946	-0.175	-1.304	0.279	-0.521	-1.471	-0.43	-0.378	0.323	-0.345	-0.232	-0.459	1.436	0.243	-2.252	0.949	0.693	-0.648	0.492	0.072	-70		3.8	0
1.94	-1.106	-1.861	0.239	-0.89	-0.581	-1.048	2.006	-0.967	-0.259	-1.227	0.276	-0.494	-1.601	-0.239	-0.509	0.377	-0.264	-0.186	-0.491	1.494	0.042	-1.94	1.15	0.801	-0.433	0.506	0.196	-70		4.8	0
1.932	-1.183	-1.832	0.151	-0.797	-0.74	-1.009	2.025	-0.897	-0.39	-1.158	0.258	-0.402	-1.699	-0.044	-0.652	0.43	-0.217	-0.196	-0.453	1.502	-0.133	-1.569	1.389	0.866	-0.169	0.527	0.322	-70		5.8	0
1.804	-1.245	-1.756	0.074	-0.642	-0.803	-0.939	1.952	-0.775	-0.548	-1.11	0.211	-0.281	-1.725	0.128	-0.785	0.487	-0.188	-0.252	-0.376	1.441	-0.238	-1.195	1.646	0.86	0.103	0.566	0.431	-70		6.8	0
1.558	-1.305	-1.666	-0.027	-0.454	-0.783	-0.84	1.805	-0.651	-0.69	-1.082	0.136	-0.18	-1.647	0.247	-0.875	0.548	-0.156	-0.336	-0.303	1.314	-0.244	-0.853	1.897	0.762	0.345	0.627	0.511	-70		7.8	0
1.226	-1.355	-1.593	-0.168	-0.278	-0.711	-0.719	1.611	-0.561	-0.771	-1.068	0.053	-0.142	-1.462	0.299	-0.883	0.607	-0.102	-0.426	-0.271	1.15	-0.145	-0.554	2.111	0.569	0.531	0.711	0.555	-70		8.8	0
0.86	-1.365	-1.562	-0.336	-0.164	-0.626	-0.586	1.393	-0.514	-0.763	-1.071	-0.014	-0.189	-1.203	0.298	-0.779	0.642	-0.016	-0.509	-0.29	0.988	0.043	-0.286	2.259	0.312	0.656	0.813	0.568	-70		9.8	3
0.512	-1.309	-1.593	-0.497	-0.142	-0.555	-0.447	1.173	-0.486	-0.668	-1.105	-0.04	-0.316	-0.925	0.287	-0.564	0.633	0.097	-0.582	-0.333	0.866	0.288	-0.028	2.315	0.041	0.733	0.921	0.567	-70		10.8	1
0.216	-1.177	-1.699	-0.616	-0.207	-0.496	-0.298	0.965	-0.446	-0.511	-1.178	-0.012	-0.493	-0.681	0.319	-0.272	0.567	0.223	-0.651	-0.354	0.802	0.553	0.23	2.27	-0.197	0.788	1.016	0.576	-70		11.8	3
-0.017	-0.993	-1.885	-0.673	-0.317	-0.435	-0.134	0.783	-0.369	-0.325	-1.275	0.071	-0.677	-0.5	0.429	0.044	0.446	0.351	-0.73	-0.315	0.796	0.802	0.474	2.146	-0.38	0.837	1.075	0.613	-70		12.8	0
-0.194	-0.809	-2.133	-0.671	-0.419	-0.363	0.05	0.633	-0.252	-0.129	-1.356	0.193	-0.825	-0.376	0.617	0.331	0.282	0.475	-0.826	-0.204	0.824	1.007	0.666	1.991	-0.521	0.88	1.081	0.68	-70		13.8	1
-0.328	-0.678	-2.387	-0.636	-0.468	-0.288	0.247	0.509	-0.118	0.067	-1.371	0.322	-0.909	-0.282	0.857	0.558	0.095	0.597	-0.931	-0.037	0.857	1.147	0.76	1.862	-0.653	0.895	1.022	0.76	-70		14.8	0
-0.428	-0.637	-2.561	-0.598	-0.446	-0.237	0.442	0.395	0.001	0.261	-1.289	0.422	-0.927	-0.191	1.11	0.727	-0.098	0.715	-1.012	0.152	0.876	1.209	0.732	1.798	-0.801	0.854	0.904	0.828	-70		15.8	0
-0.505	-0.687	-2.564	-0.581	-0.365	-0.232	0.609	0.27	0.075	0.449	-1.115	0.466	-0.897	-0.088	1.337	0.851	-0.282	0.818	-1.023	0.332	0.874	1.187	0.596	1.8	-0.966	0.74	0.749	0.856	-70		16.8	1
-0.568	-0.793	-2.346	-0.582	-0.256	-0.275	0.729	0.117	0.089	0.62	-0.883	0.448	-0.847	0.024	1.51	0.942	-0.446	0.89	-0.921	0.48	0.863	1.088	0.408	1.831	-1.114	0.564	0.591	0.831	-70		17.8	2
-0.634	-0.904	-1.917	-0.574	-0.16	-0.349	0.794	-0.063	0.045	0.764	-0.639	0.388	-0.805	0.131	1.601	0.988	-0.581	0.921	-0.699	0.589	0.853	0.934	0.237	1.837	-1.192	0.359	0.472	0.757	-70		18.8	1
-0.714	-0.969	-1.353	-0.526	-0.116	-0.424	0.807	-0.25	-0.04	0.872	-0.41	0.318	-0.782	0.219	1.589	0.961	-0.675	0.907	-0.395	0.665	0.846	0.766	0.145	1.774	-1.161	0.166	0.417	0.662	-70		19.8	1
-0.813	-0.958	-0.754	-0.418	-0.145	-0.473	0.775	-0.403	-0.147	0.949	-0.202	0.263	-0.779	0.271	1.469	0.836	-0.717	0.852	-0.085	0.713	0.828	0.624	0.16	1.625	-1.005	0.014	0.427	0.586	-70		20.8	1
-0.913	-0.869	-0.208	-0.262	-0.245	-0.483	0.708	-0.48	-0.267	1.002	-0.011	0.233	-0.781	0.273	1.261	0.614	-0.698	0.757	0.155	0.733	0.778	0.534	0.275	1.399	-0.743	-0.084	0.473	0.573	-70		21.8	0
-0.98	-0.723	0.238	-0.094	-0.389	-0.451	0.612	-0.458	-0.401	1.033	0.16	0.213	-0.772	0.211	1.012	0.328	-0.612	0.622	0.277	0.719	0.68	0.502	0.456	1.117	-0.412	-0.125	0.512	0.652	-70		22.8	2
-0.978	-0.553	0.575	0.047	-0.53	-0.384	0.495	-0.346	-0.553	1.037	0.293	0.182	-0.744	0.082	0.773	0.033	-0.463	0.448	0.287	0.659	0.532	0.514	0.662	0.801	-0.052	-0.107	0.511	0.828	-70		23.8	0
-0.874	-0.383	0.808	0.142	-0.63	-0.296	0.369	-0.191	-0.717	0.995	0.368	0.115	-0.706	-0.098	0.58	-0.224	-0.268	0.253	0.237	0.545	0.346	0.553	0.864	0.47	0.31	-0.035	0.456	1.079	-70		24.8	0
-0.663	-0.228	0.941	0.206	-0.675	-0.213	0.251	-0.059	-0.863	0.889	0.375	0.007	-0.681	-0.3	0.438	-0.418	-0.054	0.068	0.197	0.378	0.148	0.607	1.045	0.145	0.658	0.076	0.352	1.363	-70		25.8	0
-0.368	-0.092	0.975	0.271	-0.692	-0.162	0.154	-0.007	-0.95	0.716	0.327	-0.133	-0.691	-0.48	0.328	-0.555	0.143	-0.073	0.223	0.174	-0.033	0.672	1.202	-0.153	0.983	0.192	0.215	1.625	-70		26.8	1
-0.039	0.017	0.917	0.365	-0.739	-0.167	0.091	-0.063	-0.941	0.498	0.255	-0.279	-0.736	-0.603	0.228	-0.657	0.295	-0.15	0.331	-0.04	-0.164	0.745	1.331	-0.408	1.269	0.272	0.062	1.813	-70		27.8	0
0.264	0.088	0.792	0.487	-0.871	-0.235	0.07	-0.218	-0.83	0.284	0.19	-0.402	-0.786	-0.646	0.133	-0.75	0.393	-0.166	0.488	-0.237	-0.222	0.82	1.418	-0.615	1.494	0.292	-0.089	1.885	-70		28.8	0
0.489	0.102	0.642	0.606	-1.116	-0.343	0.097	-0.44	-0.643	0.129	0.155	-0.488	-0.795	-0.602	0.056	-0.847	0.456	-0.139	0.629	-0.386	-0.2	0.882	1.448	-0.777	1.635	0.26	-0.219	1.82	-70		29.8	1
0.611	0.047	0.506	0.672	-1.447	-0.454	0.167	-0.681	-0.417	0.083	0.155	-0.536	-0.724	-0.481	0.013	-0.954	0.517	-0.091	0.681	-0.472	-0.12	0.919	1.404	-0.897	1.679	0.202	-0.31	1.629	-70		30.8	0
0.633	-0.077	0.404	0.646	-1.794	-0.528	0.258	-0.9	-0.183	0.161	0.183	-0.559	-0.569	-0.295	0.011	-1.071	0.599	-0.027	0.602	-0.49	-0.027	0.922	1.28	-0.961	1.63	0.148	-0.35	1.351	-70		31.8	0
0.58	-0.248	0.317	0.519	-2.069	-0.549	0.334	-1.063	0.058	0.337	0.229	-0.568	-0.365	-0.066	0.032	-1.192	0.692	0.056	0.399	-0.456	0.031	0.885	1.075	-0.94	1.508	0.115	-0.343	1.042	-70		32.8	0
0.496	-0.433	0.204	0.313	-2.199	-0.53	0.352	-1.143	0.314	0.551	0.287	-0.561	-0.17	0.181	0.048	-1.312	0.764	0.163	0.133	-0.393	0.024	0.806	0.798	-0.81	1.336	0.102	-0.302	0.756	-70		33.8	2
0.424	-0.601	0.032	0.077	-2.158	-0.509	0.28	-1.127	0.591	0.737	0.345	-0.525	-0.037	0.416	0.035	-1.427	0.778	0.29	-0.106	-0.325	-0.042	0.677	0.47	-0.575	1.135	0.107	-0.249	0.525	-70		34.8	0
0.398	-0.735	-0.199	-0.138	-1.966	-0.523	0.116	-1.008	0.871	0.855	0.386	-0.444	0.017	0.608	-0.01	-1.535	0.727	0.42	-0.237	-0.264	-0.13	0.495	0.129	-0.28	0.921	0.127	-0.197	0.351	-70		35.8	0
0.43	-0.839	-0.443	-0.287	-1.673	-0.593	-0.113	-0.792	1.119	0.905	0.384	-0.309	0.012	0.736	-0.066	-1.635	0.636	0.531	-0.226	-0.219	-0.195	0.269	-0.182	0.004	0.707	0.162	-0.145	0.211	-70		36.8	1
0.502	-0.92	-0.635	-0.35	-1.332	-0.711	-0.353	-0.496	1.298	0.92	0.32	-0.125	-0.009	0.797	-0.103	-1.728	0.554	0.605	-0.102	-0.196	-0.205	0.035	-0.419	0.212	0.508	0.194	-0.073	0.075	-70		37.8	0
0.581	-0.987	-0.727	-0.336	-0.982	-0.844	-0.55	-0.144	1.389	0.937	0.194	0.089	-0.001	0.809	-0.102	-1.808	0.516	0.636	0.065	-0.202	-0.156	-0.148	-0.551	0.31	0.336	0.189	0.048	-0.068	-70		38.8	0
0.638	-1.039	-0.716	-0.278	-0.647	-0.95	-0.671	0.232	1.399	0.978	0.029	0.312	0.059	0.802	-0.057	-1.854	0.526	0.634	0.195	-0.247	-0.065	-0.221	-0.562	0.31	0.202	0.112	0.237	-0.209	-70		39.8	0
0.657	-1.063	-0.652	-0.229	-0.343	-0.99	-0.715	0.602	1.354	1.031	-0.133	0.527	0.169	0.805	0.023	-1.83	0.55	0.622	0.233	-0.33	0.037	-0.155	-0.451	0.253	0.103	-0.049	0.491	-0.324	-70		40.8	0
0.64	-1.039	-0.602	-0.237	-0.089	-0.943	-0.709	0.938	1.287	1.058	-0.25	0.726	0.306	0.831	0.122	-1.696	0.542	0.627	0.174	-0.439	0.126	0.027	-0.239	0.189	0.032	-0.27	0.778	-0.392	-70		41.8	1
0.598	-0.954	-0.618	-0.329	0.093	-0.809	-0.692	1.22	1.217	1.016	-0.295	0.907	0.44	0.866	0.232	-1.427	0.466	0.668	0.055	-0.552	0.185	0.252	0.021	0.158	-0.022	-0.495	1.054	-0.409	-70		42.8	1
0.541	-0.81	-0.706	-0.497	0.182	-0.619	-0.693	1.432	1.143	0.874	-0.267	1.065	0.556	0.882	0.342	-1.03	0.319	0.753	-0.069	-0.646	0.204	0.426	0.25	0.178	-0.07	-0.668	1.282	-0.389	-70		43.8	0
0.483	-0.636	-0.84	-0.697	0.173	-0.418	-0.723	1.56	1.047	0.639	-0.184	1.192	0.659	0.849	0.442	-0.548	0.134	0.869	-0.153	-0.712	0.178	0.471	0.364	0.243	-0.115	-0.76	1.445	-0.356	-70		44.8	1
0.439	-0.474	-0.987	-0.871	0.087	-0.251	-0.777	1.6	0.913	0.353	-0.08	1.27	0.764	0.76	0.518	-0.037	-0.043	0.995	-0.185	-0.754	0.106	0.363	0.304	0.318	-0.153	-0.783	1.553	-0.339	-70		45.8	0
0.425	-0.361	-1.133	-0.973	-0.028	-0.133	-0.835	1.56	0.739	0.079	0.017	1.278	0.886	0.629	0.552	0.451	-0.171	1.107	-0.181	-0.782	-0.004	0.135	0.07	0.353	-0.174	-0.772	1.626	-0.369	-70		46.8	0
0.449	-0.31	-1.284	-0.982	-0.121	-0.047	-0.871	1.465	0.545	-0.127	0.088	1.207	1.021	0.486	0.534	0.887	-0.232	1.191	-0.172	-0.807	-0.125	-0.139	-0.275	0.29	-0.162	-0.76	1.673	-0.469	-70		47.8	0
0.503	-0.307	-1.447	-0.912	-0.155	0.048	-0.863	1.347	0.369	-0.243	0.131	1.063	1.14	0.36	0.473	1.265	-0.228	1.24	-0.181	-0.83	-0.216	-0.38	-0.633	0.087	-0.104	-0.747	1.681	-0.653	-70		48.8	1
0.571	-0.326	-1.602	-0.796	-0.126	0.187	-0.796	1.227	0.246	-0.278	0.148	0.87	1.209	0.263	0.387	1.585	-0.175	1.255	-0.208	-0.847	-0.232	-0.537	-0.909	-0.269	0.007	-0.706	1.617	-0.911	-70		49.8	0
0.64	-0.335	-1.702	-0.671	-0.061	0.379	-0.673	1.106	0.19	-0.266	0.14	0.662	1.206	0.192	0.304	1.845	-0.089	1.238	-0.236	-0.851	-0.14	-0.602	-1.05	-0.75	0.171	-0.602	1.449	-1.206	-70		50.8	0
0.704	-0.315	-1.693	-0.566	0.001	0.604	-0.519	0.961	0.192	-0.237	0.101	0.468	1.136	0.133	0.235	2.034	0.01	1.182	-0.246	-0.835	0.057	-0.609	-1.057	-1.291	0.373	-0.42	1.167	-1.476	-70		51.8	0
0.768	-0.254	-1.555	-0.495	0.033	0.826	-0.365	0.768	0.223	-0.208	0.029	0.302	1.03	0.072	0.18	2.144	0.106	1.076	-0.232	-0.791	0.322	-0.611	-0.969	-1.812	0.586	-0.172	0.799	-1.654	-70		52.8	0
0.826	-0.147	-1.317	-0.46	0.03	1.017	-0.241	0.517	0.254	-0.189	-0.069	0.159	0.934	0.006	0.124	2.166	0.187	0.909	-0.206	-0.709	0.589	-0.659	-0.842	-2.232	0.773	0.107	0.405	-1.688	-70		53.8	0
0.862	0.011	-1.045	-0.46	0.01	1.171	-0.154	0.23	0.266	-0.186	-0.169	0.025	0.887	-0.065	0.058	2.103	0.25	0.682	-0.193	-0.588	0.792	-0.786	-0.717	-2.495	0.894	0.38	0.056	-1.558	-70		54.8	0
0.851	0.221	-0.81	-0.481	-0.008	1.294	-0.093	-0.054	0.249	-0.211	-0.24	-0.111	0.912	-0.136	-0.017	1.957	0.31	0.416	-0.212	-0.45	0.883	-1.001	-0.608	-2.58	0.926	0.621	-0.199	-1.283	-70		55.8	0
0.783	0.474	-0.647	-0.501	-0.022	1.396	-0.035	-0.288	0.195	-0.278	-0.262	-0.253	1.003	-0.202	-0.09	1.734	0.389	0.143	-0.268	-0.333	0.842	-1.283	-0.513	-2.503	0.866	0.821	-0.35	-0.917	-70		56.8	0
0.672	0.744	-0.545	-0.491	-0.048	1.473	0.035	-0.444	0.099	-0.391	-0.232	-0.4	1.13	-0.268	-0.148	1.445	0.508	-0.102	-0.346	-0.286	0.679	-1.583	-0.418	-2.311	0.732	0.975	-0.427	-0.53	-70		57.8	0
0.554	0.993	-0.456	-0.429	-0.105	1.509	0.12	-0.516	-0.04	-0.541	-0.167	-0.547	1.247	-0.347	-0.194	1.117	0.67	-0.291	-0.421	-0.338	0.426	-1.832	-0.313	-2.059	0.551	1.08	-0.479	-0.181	-70		58.8	0
0.468	1.178	-0.327	-0.318	-0.199	1.487	0.214	-0.527	-0.21	-0.7	-0.09	-0.69	1.305	-0.457	-0.235	0.797	0.856	-0.411	-0.473	-0.488	0.122	-1.96	-0.194	-1.795	0.347	1.128	-0.548	0.102	-70		59.8	0
0.437	1.275	-0.127	-0.193	-0.312	1.397	0.313	-0.51	-0.385	-0.835	-0.022	-0.825	1.267	-0.602	-0.278	0.542	1.034	-0.468	-0.496	-0.702	-0.192	-1.918	-0.065	-1.543	0.127	1.113	-0.64	0.327	-70
0.457	1.281	0.135	-0.105	-0.41	1.243	0.424	-0.504	-0.537	-0.913	0.027	-0.941	1.122	-0.771	-0.319	0.398	1.17	-0.477	-0.5	-0.929	-0.482	-1.696	0.071	-1.31	-0.102	1.038	-0.735	0.532	-70
0.507	1.222	0.417	-0.1	-0.466	1.041	0.555	-0.531	-0.648	-0.913	0.056	-1.027	0.885	-0.931	-0.345	0.385	1.236	-0.458	-0.501	-1.122	-0.727	-1.324	0.212	-1.095	-0.33	0.912	-0.799	0.755	-70
0.56	1.13	0.672	-0.187	-0.472	0.811	0.704	-0.588	-0.719	-0.836	0.072	-1.066	0.591	-1.048	-0.349	0.492	1.213	-0.429	-0.513	-1.245	-0.92	-0.863	0.359	-0.897	-0.533	0.751	-0.814	1.015	-70
0.596	1.032	0.861	-0.334	-0.446	0.57	0.853	-0.647	-0.761	-0.699	0.085	-1.039	0.276	-1.094	-0.331	0.674	1.094	-0.404	-0.539	-1.277	-1.065	-0.386	0.512	-0.72	-0.676	0.569	-0.781	1.295	-70
0.61	0.938	0.979	-0.484	-0.414	0.333	0.964	-0.671	-0.786	-0.534	0.108	-0.934	-0.033	-1.064	-0.302	0.878	0.89	-0.4	-0.571	-1.213	-1.17	0.038	0.665	-0.565	-0.727	0.379	-0.713	1.545	-70
0.611	0.843	1.053	-0.58	-0.402	0.105	0.993	-0.632	-0.787	-0.374	0.144	-0.76	-0.32	-0.964	-0.272	1.043	0.624	-0.439	-0.596	-1.058	-1.239	0.363	0.801	-0.428	-0.671	0.204	-0.615	1.7	-70
0.619	0.738	1.128	-0.591	-0.421	-0.112	0.897	-0.533	-0.747	-0.244	0.185	-0.548	-0.579	-0.809	-0.239	1.115	0.331	-0.549	-0.603	-0.83	-1.267	0.57	0.897	-0.3	-0.516	0.07	-0.478	1.716	-70
0.647	0.625	1.239	-0.514	-0.468	-0.315	0.657	-0.409	-0.646	-0.161	0.213	-0.349	-0.795	-0.62	-0.195	1.049	0.044	-0.749	-0.586	-0.561	-1.249	0.663	0.939	-0.167	-0.288	0.004	-0.288	1.593	-70
0.696	0.528	1.402	-0.369	-0.526	-0.494	0.287	-0.31	-0.482	-0.129	0.207	-0.217	-0.953	-0.421	-0.136	0.825	-0.214	-1.035	-0.539	-0.287	-1.186	0.659	0.934	-0.02	-0.031	0.015	-0.046	1.383	-70
0.748	0.487	1.599	-0.186	-0.569	-0.635	-0.161	-0.282	-0.269	-0.141	0.162	-0.185	-1.034	-0.24	-0.075	0.46	-0.439	-1.374	-0.456	-0.048	-1.099	0.581	0.919	0.142	0.203	0.085	0.221	1.168	-70
0.779	0.535	1.801	0.002	-0.565	-0.733	-0.612	-0.348	-0.042	-0.178	0.089	-0.251	-1.024	-0.096	-0.044	0.007	-0.639	-1.709	-0.323	0.124	-1.02	0.448	0.943	0.308	0.367	0.178	0.466	1.021	-70
0.769	0.682	1.98	0.166	-0.495	-0.794	-0.995	-0.503	0.163	-0.211	0.011	-0.378	-0.92	0.003	-0.08	-0.459	-0.825	-1.982	-0.131	0.212	-0.979	0.279	1.039	0.453	0.435	0.253	0.642	0.972	-70
0.717	0.899	2.119	0.286	-0.356	-0.833	-1.265	-0.722	0.314	-0.209	-0.049	-0.512	-0.73	0.056	-0.202	-0.858	-1	-2.15	0.119	0.214	-0.974	0.088	1.207	0.543	0.411	0.284	0.721	0.997	-70
0.637	1.134	2.211	0.361	-0.176	-0.866	-1.405	-0.968	0.388	-0.156	-0.081	-0.601	-0.469	0.061	-0.396	-1.138	-1.153	-2.194	0.403	0.144	-0.975	-0.117	1.413	0.549	0.334	0.274	0.699	1.034	-70
0.551	1.334	2.244	0.407	0	-0.898	-1.418	-1.207	0.378	-0.063	-0.078	-0.622	-0.163	0.008	-0.621	-1.278	-1.26	-2.127	0.675	0.025	-0.937	-0.332	1.603	0.457	0.259	0.243	0.591	1.014	-70
0.472	1.467	2.205	0.456	0.132	-0.918	-1.316	-1.417	0.291	0.04	-0.04	-0.581	0.15	-0.106	-0.829	-1.295	-1.295	-1.973	0.88	-0.12	-0.826	-0.557	1.728	0.278	0.239	0.217	0.418	0.893	-70
0.401	1.53	2.085	0.539	0.2	-0.907	-1.118	-1.588	0.145	0.116	0.039	-0.501	0.424	-0.263	-0.988	-1.232	-1.236	-1.769	0.975	-0.267	-0.641	-0.787	1.764	0.051	0.302	0.215	0.196	0.666	-70
0.325	1.541	1.89	0.674	0.222	-0.846	-0.855	-1.719	-0.033	0.139	0.161	-0.4	0.62	-0.417	-1.082	-1.141	-1.078	-1.557	0.952	-0.397	-0.41	-1.007	1.716	-0.166	0.439	0.238	-0.068	0.37	-70
0.225	1.526	1.641	0.86	0.241	-0.718	-0.565	-1.814	-0.217	0.101	0.324	-0.285	0.714	-0.504	-1.112	-1.073	-0.835	-1.377	0.841	-0.49	-0.178	-1.191	1.604	-0.31	0.604	0.274	-0.369	0.066	-70
0.09	1.49	1.377	1.071	0.305	-0.52	-0.283	-1.875	-0.388	0.012	0.51	-0.153	0.711	-0.474	-1.084	-1.067	-0.54	-1.262	0.694	-0.529	0.012	-1.307	1.447	-0.341	0.735	0.308	-0.694	-0.187	-70
-0.084	1.422	1.145	1.261	0.451	-0.253	-0.029	-1.908	-0.539	-0.115	0.686	-0.007	0.638	-0.318	-0.998	-1.138	-0.242	-1.222	0.559	-0.499	0.139	-1.334	1.253	-0.249	0.773	0.326	-1.007	-0.351	-70
-0.296	1.295	0.988	1.375	0.686	0.066	0.199	-1.914	-0.664	-0.263	0.813	0.132	0.53	-0.065	-0.855	-1.273	0.003	-1.237	0.456	-0.389	0.206	-1.267	1.026	-0.068	0.691	0.322	-1.25	-0.419	-70
-0.538	1.089	0.932	1.361	0.984	0.407	0.409	-1.895	-0.756	-0.412	0.862	0.239	0.416	0.227	-0.661	-1.432	0.148	-1.264	0.375	-0.195	0.236	-1.127	0.781	0.142	0.5	0.304	-1.364	-0.422	-70
-0.799	0.803	0.977	1.19	1.284	0.736	0.606	-1.847	-0.801	-0.547	0.822	0.298	0.309	0.504	-0.436	-1.562	0.165	-1.254	0.294	0.065	0.253	-0.956	0.544	0.318	0.24	0.289	-1.31	-0.416	-70
-1.055	0.463	1.098	0.866	1.51	1.02	0.781	-1.759	-0.783	-0.652	0.71	0.314	0.211	0.726	-0.208	-1.613	0.062	-1.176	0.208	0.36	0.276	-0.802	0.344	0.417	-0.034	0.3	-1.09	-0.463	-70
-1.271	0.108	1.254	0.429	1.605	1.238	0.91	-1.62	-0.7	-0.718	0.566	0.314	0.118	0.871	-0.01	-1.559	-0.117	-1.029	0.139	0.64	0.306	-0.703	0.196	0.427	-0.273	0.347	-0.753	-0.604	-70
-1.417	-0.215	1.404	-0.054	1.555	1.379	0.969	-1.419	-0.564	-0.739	0.443	0.328	0.028	0.938	0.14	-1.4	-0.303	-0.841	0.126	0.853	0.323	-0.672	0.095	0.367	-0.446	0.427	-0.38	-0.842	-70
-1.475	-0.465	1.525	-0.507	1.395	1.433	0.943	-1.161	-0.405	-0.712	0.384	0.368	-0.052	0.94	0.245	-1.164	-0.426	-0.649	0.199	0.95	0.299	-0.694	0.021	0.265	-0.538	0.515	-0.06	-1.136	-70
-1.45	-0.61	1.62	-0.865	1.197	1.395	0.84	-0.859	-0.25	-0.638	0.409	0.429	-0.105	0.906	0.326	-0.895	-0.442	-0.48	0.353	0.907	0.206	-0.735	-0.046	0.148	-0.546	0.58	0.144	-1.418	-70
-1.368	-0.63	1.708	-1.084	1.034	1.264	0.686	-0.537	-0.117	-0.526	0.503	0.491	-0.117	0.87	0.405	-0.646	-0.35	-0.343	0.543	0.729	0.03	-0.764	-0.12	0.034	-0.48	0.592	0.212	-1.617	-70
-1.262	-0.529	1.813	-1.155	0.961	1.056	0.524	-0.224	-0.015	-0.392	0.63	0.535	-0.08	0.862	0.492	-0.449	-0.191	-0.229	0.7	0.464	-0.218	-0.762	-0.206	-0.068	-0.36	0.543	0.173	-1.685	-70
-1.16	-0.33	1.938	-1.103	0.999	0.803	0.402	0.05	0.049	-0.261	0.746	0.547	-0.005	0.895	0.575	-0.306	-0.018	-0.12	0.765	0.183	-0.514	-0.731	-0.304	-0.157	-0.219	0.45	0.084	-1.615	-70
-1.078	-0.075	2.062	-0.976	1.134	0.541	0.358	0.26	0.065	-0.155	0.827	0.524	0.076	0.962	0.632	-0.186	0.124	-0.007	0.715	-0.04	-0.822	-0.677	-0.413	-0.238	-0.099	0.347	0.005	-1.439	-70
-1.025	0.186	2.147	-0.828	1.315	0.3	0.41	0.39	0.023	-0.088	0.871	0.46	0.13	1.046	0.639	-0.042	0.212	0.116	0.572	-0.152	-1.11	-0.607	-0.528	-0.328	-0.036	0.27	-0.032	-1.209	-70
-0.998	0.407	2.161	-0.702	1.472	0.095	0.548	0.441	-0.077	-0.064	0.894	0.354	0.139	1.119	0.586	0.154	0.24	0.248	0.378	-0.141	-1.35	-0.527	-0.642	-0.447	-0.047	0.235	-0.034	-0.975	-70
-0.993	0.561	2.083	-0.612	1.532	-0.07	0.735	0.428	-0.211	-0.079	0.918	0.202	0.111	1.154	0.475	0.394	0.204	0.391	0.173	-0.031	-1.524	-0.455	-0.735	-0.607	-0.128	0.232	-0.038	-0.763	-70
-1.008	0.646	1.908	-0.541	1.444	-0.199	0.914	0.375	-0.342	-0.121	0.955	0.008	0.069	1.129	0.317	0.635	0.097	0.546	-0.02	0.129	-1.621	-0.42	-0.782	-0.802	-0.253	0.24	-0.088	-0.575	-70
-1.045	0.679	1.637	-0.456	1.202	-0.298	1.036	0.3	-0.424	-0.178	1.003	-0.216	0.035	1.038	0.133	0.827	-0.085	0.714	-0.198	0.278	-1.647	-0.451	-0.763	-0.997	-0.392	0.247	-0.209	-0.403	-70
-1.114	0.682	1.282	-0.333	0.848	-0.367	1.068	0.213	-0.427	-0.231	1.05	-0.452	0.011	0.891	-0.047	0.939	-0.33	0.894	-0.357	0.375	-1.623	-0.556	-0.673	-1.148	-0.518	0.255	-0.397	-0.243	-70
-1.226	0.672	0.864	-0.171	0.466	-0.402	1.013	0.112	-0.347	-0.257	1.086	-0.673	-0.025	0.72	-0.189	0.973	-0.605	1.072	-0.48	0.399	-1.583	-0.718	-0.534	-1.22	-0.618	0.282	-0.63	-0.105	-70
-1.392	0.65	0.423	0.006	0.151	-0.405	0.905	-0.007	-0.209	-0.241	1.102	-0.855	-0.097	0.562	-0.263	0.953	-0.862	1.229	-0.541	0.361	-1.562	-0.897	-0.387	-1.206	-0.684	0.345	-0.875	-0.004	-70
-1.61	0.604	0.013	0.17	-0.014	-0.385	0.794	-0.142	-0.055	-0.174	1.092	-0.976	-0.206	0.447	-0.262	0.906	-1.056	1.345	-0.514	0.29	-1.579	-1.039	-0.271	-1.128	-0.714	0.445	-1.102	0.053	-70
-1.854	0.52	-0.313	0.308	0.007	-0.369	0.722	-0.278	0.073	-0.058	1.049	-1.025	-0.322	0.395	-0.204	0.847	-1.156	1.406	-0.389	0.221	-1.63	-1.098	-0.207	-1.016	-0.704	0.567	-1.289	0.065	-70
-2.078	0.393	-0.516	0.428	0.192	-0.388	0.7	-0.39	0.148	0.097	0.959	-1.006	-0.396	0.411	-0.127	0.777	-1.154	1.413	-0.177	0.184	-1.691	-1.045	-0.183	-0.89	-0.641	0.676	-1.42	0.036	-70
-2.23	0.235	-0.584	0.545	0.471	-0.461	0.709	-0.458	0.176	0.274	0.808	-0.937	-0.383	0.492	-0.073	0.699	-1.066	1.386	0.092	0.209	-1.727	-0.884	-0.17	-0.749	-0.514	0.734	-1.483	-0.033	-70
-2.275	0.073	-0.535	0.659	0.749	-0.584	0.71	-0.474	0.191	0.447	0.595	-0.85	-0.27	0.62	-0.073	0.621	-0.918	1.351	0.378	0.316	-1.714	-0.648	-0.144	-0.585	-0.322	0.716	-1.474	-0.141	-70
-2.215	-0.059	-0.409	0.745	0.948	-0.726	0.678	-0.445	0.245	0.586	0.338	-0.765	-0.078	0.765	-0.138	0.564	-0.747	1.338	0.653	0.508	-1.648	-0.389	-0.102	-0.402	-0.088	0.624	-1.398	-0.282	-70
-2.082	-0.134	-0.258	0.763	1.035	-0.85	0.608	-0.389	0.374	0.661	0.073	-0.681	0.147	0.886	-0.262	0.545	-0.594	1.367	0.898	0.768	-1.542	-0.162	-0.069	-0.219	0.144	0.49	-1.265	-0.435	-70
-1.911	-0.143	-0.13	0.68	1.026	-0.929	0.52	-0.321	0.58	0.652	-0.161	-0.57	0.354	0.942	-0.423	0.559	-0.494	1.446	1.102	1.051	-1.42	0.001	-0.085	-0.064	0.324	0.371	-1.089	-0.561	-70
-1.719	-0.11	-0.058	0.49	0.967	-0.959	0.441	-0.248	0.819	0.552	-0.346	-0.386	0.503	0.907	-0.592	0.589	-0.468	1.569	1.26	1.31	-1.31	0.09	-0.177	0.047	0.421	0.317	-0.882	-0.608	-70
-1.496	-0.082	-0.053	0.22	0.903	-0.949	0.387	-0.166	1.026	0.363	-0.492	-0.099	0.564	0.783	-0.74	0.619	-0.513	1.723	1.365	1.507	-1.227	0.116	-0.344	0.12	0.434	0.345	-0.647	-0.534	-70
-1.232	-0.112	-0.111	-0.083	0.855	-0.916	0.362	-0.065	1.143	0.098	-0.631	0.296	0.529	0.597	-0.844	0.654	-0.599	1.89	1.419	1.634	-1.171	0.101	-0.552	0.183	0.397	0.435	-0.385	-0.325	-70
-0.933	-0.234	-0.223	-0.367	0.82	-0.862	0.365	0.058	1.147	-0.223	-0.799	0.773	0.406	0.389	-0.899	0.732	-0.685	2.047	1.434	1.708	-1.122	0.062	-0.751	0.269	0.347	0.53	-0.102	-0.008	-70
-0.641	-0.439	-0.389	-0.597	0.787	-0.775	0.402	0.196	1.054	-0.568	-1.022	1.29	0.227	0.196	-0.917	0.905	-0.734	2.177	1.43	1.758	-1.041	0.011	-0.895	0.399	0.31	0.57	0.193	0.36	-70
-0.417	-0.673	-0.613	-0.758	0.759	-0.629	0.481	0.331	0.912	-0.895	-1.307	1.808	0.04	0.036	-0.927	1.21	-0.731	2.268	1.427	1.81	-0.892	-0.048	-0.963	0.58	0.286	0.514	0.481	0.707	-70
-0.309	-0.862	-0.9	-0.861	0.755	-0.406	0.607	0.439	0.774	-1.158	-1.645	2.301	-0.105	-0.088	-0.963	1.65	-0.686	2.318	1.434	1.878	-0.651	-0.118	-0.963	0.805	0.259	0.357	0.739	0.979	-70
-0.332	-0.944	-1.244	-0.923	0.795	-0.104	0.775	0.504	0.684	-1.328	-2.02	2.754	-0.175	-0.188	-1.044	2.188	-0.63	2.333	1.445	1.962	-0.328	-0.2	-0.922	1.06	0.214	0.124	0.949	1.15	-30
																												-30
																												-30
																												-30
																												-30
																												-30
																												-30
																												-30
																												-30
																												-30
																												-30
																												-30
																												-30
																												-30
																												-30
																												-30
																												-30
																												-30
																												-70
																												-70
																												-70
																												-70
																												-70
																												-70
																												-70
																												-70
																												-70
																												-70
																												-70
																												-70
																												-70
																												-70
																												-70
																												-70
-24.592	-20.118	-21.865	-28.808	-25.315	-24.969	-25.614	-23.334	-25.057	-23.741	-26.751	-23.514	-25.271	-30.239	-24.444	-24.297	-35.711	-24.207	-20.513	-24.321	-24.899	-19.639	-23.256	-25.66	-22.58	-24.531	-20.753	-24.666	-70
-23.327	-18.636	-20.179	-28.046	-24.202	-24.112	-24.413	-21.867	-23.63	-22.016	-25.173	-21.991	-24.391	-29.082	-22.908	-22.816	-34.601	-22.483	-19.232	-23.38	-23.582	-18.458	-22.391	-24.742	-22.054	-24.171	-19.855	-24.638	-70
-21.829	-16.986	-18.377	-27.09	-22.892	-23.139	-22.975	-20.262	-21.927	-20.067	-23.414	-20.295	-23.346	-27.851	-21.058	-21.077	-33.232	-20.529	-17.804	-22.421	-21.99	-17.061	-21.367	-23.572	-21.496	-23.677	-18.783	-24.507	-70
-20.282	-15.315	-16.649	-26.087	-21.566	-22.215	-21.473	-18.763	-20.139	-18.079	-21.671	-18.626	-22.304	-26.748	-19.028	-19.255	-31.827	-18.588	-16.384	-21.559	-20.312	-15.599	-20.311	-22.325	-21.043	-23.175	-17.685	-24.377	-70
-18.846	-13.716	-15.111	-25.152	-20.364	-21.453	-20.04	-17.56	-18.423	-16.187	-20.087	-17.134	-21.386	-25.873	-16.929	-17.48	-30.56	-16.842	-15.073	-20.822	-18.715	-14.187	-19.325	-21.146	-20.779	-22.781	-16.677	-24.322	-70
-17.633	-12.232	-13.803	-24.356	-19.366	-20.902	-18.757	-16.752	-16.878	-14.457	-18.721	-15.895	-20.652	-25.225	-14.852	-15.838	-29.527	-15.384	-13.924	-20.175	-17.327	-12.902	-18.485	-20.121	-20.729	-22.578	-15.818	-24.375	-70
-16.695	-10.88	-12.711	-23.726	-18.599	-20.558	-17.657	-16.347	-15.54	-12.903	-17.572	-14.923	-20.102	-24.743	-12.881	-14.388	-28.758	-14.232	-12.968	-19.568	-16.226	-11.799	-17.832	-19.284	-20.884	-22.609	-15.13	-24.532	-70
-16.02	-9.68	-11.795	-23.265	-18.062	-20.387	-16.741	-16.277	-14.402	-11.499	-16.6	-14.185	-19.71	-24.365	-11.098	-13.171	-28.241	-13.357	-12.23	-18.976	-15.449	-10.928	-17.374	-18.626	-21.225	-22.871	-14.61	-24.764	-70
-15.555	-8.666	-11.02	-22.964	-17.735	-20.345	-15.997	-16.44	-13.439	-10.203	-15.766	-13.616	-19.447	-24.059	-9.573	-12.214	-27.946	-12.704	-11.727	-18.41	-14.986	-10.335	-17.082	-18.112	-21.737	-23.321	-14.249	-25.03	-70
-15.234	-7.876	-10.369	-22.81	-17.587	-20.395	-15.405	-16.736	-12.628	-8.978	-15.051	-13.148	-19.3	-23.835	-8.347	-11.515	-27.847	-12.207	-11.461	-17.897	-14.794	-10.039	-16.904	-17.695	-22.408	-23.893	-14.032	-25.296	-70
-15.01	-7.321	-9.839	-22.797	-17.577	-20.51	-14.95	-17.099	-11.959	-7.803	-14.455	-12.729	-19.264	-23.719	-7.418	-11.043	-27.921	-11.796	-11.402	-17.454	-14.811	-10.016	-16.789	-17.337	-23.226	-24.515	-13.934	-25.542	-70
-14.87	-6.97	-9.433	-22.914	-17.658	-20.686	-14.626	-17.495	-11.437	-6.689	-13.989	-12.341	-19.334	-23.734	-6.74	-10.745	-28.155	-11.414	-11.493	-17.078	-14.972	-10.201	-16.708	-17.021	-24.166	-25.139	-13.908	-25.764	-70
-14.832	-6.748	-9.142	-23.145	-17.791	-20.936	-14.427	-17.913	-11.077	-5.673	-13.659	-12.004	-19.492	-23.884	-6.241	-10.57	-28.532	-11.025	-11.666	-16.756	-15.219	-10.499	-16.653	-16.762	-25.193	-25.744	-13.906	-25.969	-70
-14.913	-6.55	-8.946	-23.465	-17.95	-21.284	-14.347	-18.342	-10.888	-4.804	-13.461	-11.762	-19.71	-24.153	-5.849	-10.472	-29.029	-10.627	-11.855	-16.475	-15.501	-10.811	-16.625	-16.588	-26.274	-26.337	-13.892	-26.168	-70
-15.105	-6.285	-8.815	-23.848	-18.126	-21.756	-14.372	-18.759	-10.86	-4.122	-13.384	-11.655	-19.957	-24.504	-5.513	-10.422	-29.612	-10.246	-12.015	-16.238	-15.773	-11.055	-16.617	-16.524	-27.379	-26.933	-13.866	-26.369	-70
-15.366	-5.903	-8.724	-24.27	-18.32	-22.362	-14.474	-19.137	-10.959	-3.638	-13.417	-11.704	-20.208	-24.894	-5.208	-10.396	-30.244	-9.922	-12.122	-16.053	-16.002	-11.171	-16.613	-16.569	-28.492	-27.546	-13.859	-26.575	-70
-15.632	-5.414	-8.662	-24.712	-18.537	-23.085	-14.625	-19.449	-11.126	-3.326	-13.548	-11.891	-20.453	-25.277	-4.924	-10.379	-30.884	-9.69	-12.179	-15.926	-16.18	-11.136	-16.601	-16.697	-29.604	-28.181	-13.907	-26.786	-70
-15.845	-4.872	-8.637	-25.16	-18.771	-23.881	-14.799	-19.694	-11.297	-3.135	-13.763	-12.169	-20.697	-25.615	-4.65	-10.362	-31.495	-9.567	-12.198	-15.849	-16.325	-10.967	-16.585	-16.875	-30.706	-28.835	-14.033	-27.008	-70
-15.98	-4.352	-8.663	-25.597	-19.013	-24.686	-14.974	-19.891	-11.418	-3.001	-14.04	-12.479	-20.962	-25.891	-4.367	-10.357	-32.046	-9.554	-12.194	-15.807	-16.476	-10.721	-16.586	-17.077	-31.785	-29.504	-14.235	-27.252	-70
-16.049	-3.911	-8.75	-26.007	-19.253	-25.434	-15.129	-20.077	-11.471	-2.874	-14.355	-12.771	-21.274	-26.105	-4.058	-10.384	-32.52	-9.648	-12.172	-15.79	-16.666	-10.478	-16.622	-17.303	-32.817	-30.185	-14.494	-27.531	-70
-16.092	-3.578	-8.902	-26.377	-19.485	-26.071	-15.233	-20.288	-11.466	-2.73	-14.684	-13.014	-21.651	-26.271	-3.719	-10.468	-32.914	-9.846	-12.133	-15.802	-16.899	-10.315	-16.701	-17.566	-33.775	-30.861	-14.788	-27.846	-70
-16.15	-3.348	-9.116	-26.703	-19.707	-26.563	-15.254	-20.542	-11.44	-2.569	-14.999	-13.192	-22.088	-26.408	-3.369	-10.614	-33.242	-10.151	-12.075	-15.866	-17.135	-10.284	-16.805	-17.882	-34.626	-31.504	-15.107	-28.179	-70
-16.248	-3.189	-9.39	-26.988	-19.92	-26.905	-15.159	-20.832	-11.432	-2.405	-15.269	-13.3	-22.557	-26.53	-3.035	-10.81	-33.534	-10.55	-12.005	-16.008	-17.312	-10.39	-16.908	-18.257	-35.345	-32.079	-15.45	-28.502	-70
-16.385	-3.064	-9.718	-27.248	-20.113	-27.119	-14.931	-21.126	-11.472	-2.252	-15.465	-13.335	-23.014	-26.654	-2.734	-11.022	-33.826	-11.01	-11.936	-16.246	-17.371	-10.597	-16.982	-18.681	-35.92	-32.557	-15.816	-28.789	-70
-16.545	-2.942	-10.073	-27.499	-20.272	-27.25	-14.58	-21.376	-11.569	-2.114	-15.567	-13.293	-23.42	-26.798	-2.469	-11.216	-34.156	-11.479	-11.886	-16.567	-17.292	-10.838	-17.008	-19.132	-36.359	-32.939	-16.193	-29.042	-70
-16.71	-2.806	-10.404	-27.752	-20.382	-27.359	-14.152	-21.541	-11.711	-1.988	-15.578	-13.177	-23.761	-26.986	-2.226	-11.368	-34.546	-11.894	-11.875	-16.93	-17.105	-11.042	-16.974	-19.58	-36.685	-33.257	-16.549	-29.291	-70
-16.876	-2.655	-10.642	-28.004	-20.442	-27.503	-13.721	-21.59	-11.872	-1.868	-15.53	-13.001	-24.052	-27.238	-1.995	-11.474	-35.007	-12.204	-11.916	-17.271	-16.878	-11.152	-16.878	-19.991	-36.932	-33.568	-16.85	-29.585	-70
-17.047	-2.496	-10.726	-28.242	-20.468	-27.726	-13.373	-21.521	-12.025	-1.757	-15.462	-12.793	-24.328	-27.564	-1.769	-11.537	-35.531	-12.38	-12.008	-17.536	-16.693	-11.135	-16.721	-20.337	-37.135	-33.929	-17.076	-29.958	-70
-17.236	-2.338	-10.636	-28.456	-20.49	-28.049	-13.182	-21.367	-12.154	-1.662	-15.409	-12.594	-24.625	-27.958	-1.553	-11.563	-36.097	-12.42	-12.132	-17.707	-16.613	-10.991	-16.516	-20.593	-37.321	-34.371	-17.233	-30.414	-70
-17.455	-2.185	-10.406	-28.642	-20.533	-28.464	-13.185	-21.187	-12.26	-1.589	-15.384	-12.451	-24.954	-28.4	-1.354	-11.55	-36.667	-12.339	-12.253	-17.812	-16.663	-10.749	-16.288	-20.744	-37.506	-34.884	-17.353	-30.91	-70
-17.714	-2.038	-10.119	-28.814	-20.606	-28.94	-13.371	-21.051	-12.351	-1.537	-15.378	-12.397	-25.301	-28.865	-1.179	-11.49	-37.19	-12.166	-12.335	-17.91	-16.824	-10.454	-16.07	-20.78	-37.698	-35.423	-17.484	-31.376	-70
-18.018	-1.898	-9.87	-28.993	-20.698	-29.434	-13.684	-21.026	-12.435	-1.494	-15.381	-12.44	-25.636	-29.324	-1.033	-11.377	-37.611	-11.94	-12.354	-18.059	-17.049	-10.155	-15.896	-20.698	-37.898	-35.934	-17.67	-31.746	-70
-18.362	-1.769	-9.736	-29.196	-20.794	-29.903	-14.046	-21.149	-12.513	-1.445	-15.394	-12.56	-25.94	-29.751	-0.925	-11.218	-37.889	-11.7	-12.306	-18.283	-17.282	-9.89	-15.796	-20.501	-38.098	-36.374	-17.935	-31.987	-70
-18.725	-1.659	-9.752	-29.433	-20.884	-30.312	-14.384	-21.424	-12.582	-1.374	-15.431	-12.714	-26.209	-30.123	-0.858	-11.032	-38.018	-11.477	-12.208	-18.562	-17.484	-9.681	-15.784	-20.204	-38.294	-36.722	-18.284	-32.117	-70
-19.075	-1.574	-9.906	-29.693	-20.974	-30.643	-14.647	-21.82	-12.641	-1.27	-15.512	-12.862	-26.459	-30.421	-0.833	-10.847	-38.032	-11.291	-12.088	-18.842	-17.64	-9.541	-15.86	-19.846	-38.486	-36.977	-18.699	-32.189	-70
-19.372	-1.516	-10.157	-29.954	-21.07	-30.889	-14.822	-22.273	-12.698	-1.124	-15.648	-12.978	-26.707	-30.633	-0.837	-10.684	-38.001	-11.146	-11.982	-19.067	-17.759	-9.474	-16.011	-19.486	-38.688	-37.148	-19.155	-32.261	-70
-19.594	-1.482	-10.456	-30.185	-21.175	-31.064	-14.919	-22.704	-12.758	-0.932	-15.836	-13.062	-26.964	-30.757	-0.848	-10.558	-38.007	-11.03	-11.919	-19.203	-17.858	-9.479	-16.225	-19.205	-38.922	-37.246	-19.626	-32.365	-70
-19.736	-1.463	-10.759	-30.357	-21.278	-31.196	-14.953	-23.037	-12.81	-0.686	-16.058	-13.132	-27.234	-30.809	-0.852	-10.467	-38.114	-10.925	-11.918	-19.252	-17.956	-9.543	-16.492	-19.078	-39.21	-37.288	-20.089	-32.5	-70
-19.806	-1.453	-11.031	-30.45	-21.364	-31.32	-14.931	-23.225	-12.828	-0.387	-16.288	-13.217	-27.521	-30.819	-0.846	-10.408	-38.356	-10.821	-11.981	-19.246	-18.063	-9.635	-16.805	-19.156	-39.57	-37.295	-20.523	-32.644	-70
-19.807	-1.442	-11.237	-30.467	-21.423	-31.464	-14.851	-23.262	-12.786	-0.049	-16.496	-13.342	-27.829	-30.817	-0.849	-10.376	-38.729	-10.72	-12.096	-19.233	-18.176	-9.721	-17.148	-19.451	-40.026	-37.299	-20.91	-32.777	-70
-19.729	-1.416	-11.344	-30.429	-21.45	-31.635	-14.714	-23.186	-12.682	0.298	-16.659	-13.521	-28.167	-30.824	-0.892	-10.375	-39.204	-10.635	-12.235	-19.245	-18.282	-9.769	-17.493	-19.924	-40.6	-37.337	-21.232	-32.903	-70
-19.556	-1.353	-11.324	-30.379	-21.452	-31.818	-14.534	-23.058	-12.542	0.603	-16.769	-13.741	-28.543	-30.843	-1.001	-10.414	-39.741	-10.576	-12.372	-19.292	-18.357	-9.768	-17.796	-20.497	-41.307	-37.43	-21.48	-33.047	-70
-19.28	-1.226	-11.166	-30.363	-21.439	-31.989	-14.338	-22.942	-12.422	0.816	-16.842	-13.97	-28.953	-30.855	-1.184	-10.496	-40.297	-10.543	-12.489	-19.354	-18.373	-9.729	-18.017	-21.074	-42.147	-37.589	-21.649	-33.243	-70
-18.915	-1.016	-10.889	-30.421	-21.421	-32.128	-14.155	-22.882	-12.385	0.897	-16.911	-14.161	-29.384	-30.831	-1.421	-10.61	-40.839	-10.527	-12.577	-19.396	-18.309	-9.687	-18.135	-21.566	-43.092	-37.805	-21.741	-33.508	-70
-18.492	-0.726	-10.538	-30.571	-21.414	-32.239	-13.998	-22.893	-12.475	0.836	-17.022	-14.276	-29.813	-30.743	-1.666	-10.731	-41.344	-10.515	-12.636	-19.394	-18.169	-9.685	-18.156	-21.911	-44.093	-38.067	-21.746	-33.837	-70
-18.054	-0.387	-10.171	-30.802	-21.427	-32.347	-13.861	-22.972	-12.708	0.653	-17.207	-14.3	-30.211	-30.582	-1.865	-10.824	-41.803	-10.505	-12.664	-19.339	-17.981	-9.763	-18.107	-22.084	-45.086	-38.363	-21.644	-34.203	-70
-17.639	-0.054	-9.844	-31.081	-21.467	-32.488	-13.723	-23.102	-13.062	0.386	-17.472	-14.24	-30.554	-30.365	-1.97	-10.862	-42.218	-10.51	-12.655	-19.246	-17.791	-9.938	-18.021	-22.099	-46	-38.674	-21.417	-34.569	-70
-17.275	0.207	-9.596	-31.357	-21.535	-32.688	-13.575	-23.271	-13.485	0.082	-17.792	-14.124	-30.823	-30.138	-1.957	-10.827	-42.597	-10.556	-12.599	-19.138	-17.642	-10.204	-17.923	-21.998	-46.77	-38.977	-21.066	-34.903	-70
-16.977	0.34	-9.441	-31.582	-21.623	-32.952	-13.423	-23.472	-13.911	-0.226	-18.12	-13.982	-31.009	-29.965	-1.835	-10.715	-42.947	-10.667	-12.488	-19.038	-17.557	-10.528	-17.819	-21.843	-47.345	-39.239	-20.635	-35.193	-70
-16.761	0.324	-9.375	-31.718	-21.717	-33.265	-13.29	-23.703	-14.271	-0.519	-18.398	-13.839	-31.103	-29.902	-1.638	-10.535	-43.266	-10.851	-12.326	-18.958	-17.538	-10.865	-17.701	-21.7	-47.71	-39.433	-20.206	-35.447	-70
-16.636	0.175	-9.382	-31.75	-21.799	-33.598	-13.19	-23.967	-14.515	-0.787	-18.577	-13.715	-31.106	-29.981	-1.415	-10.315	-43.529	-11.097	-12.137	-18.908	-17.573	-11.173	-17.566	-21.628	-47.893	-39.546	-19.864	-35.684	-70
-16.611	-0.049	-9.44	-31.686	-21.853	-33.926	-13.119	-24.266	-14.622	-1.019	-18.624	-13.624	-31.032	-30.206	-1.211	-10.103	-43.693	-11.38	-11.961	-18.898	-17.647	-11.422	-17.427	-21.655	-47.964	-39.579	-19.664	-35.915	-70
-16.681	-0.28	-9.532	-31.565	-21.871	-34.228	-13.052	-24.608	-14.6	-1.193	-18.527	-13.589	-30.91	-30.555	-1.049	-9.966	-43.715	-11.673	-11.845	-18.932	-17.747	-11.599	-17.313	-21.779	-48.003	-39.543	-19.609	-36.134	-70
-16.827	-0.456	-9.648	-31.438	-21.857	-34.491	-12.957	-25.004	-14.482	-1.284	-18.296	-13.63	-30.776	-30.989	-0.929	-9.961	-43.577	-11.964	-11.818	-19.006	-17.867	-11.697	-17.259	-21.969	-48.068	-39.45	-19.663	-36.324	-70
-17.019	-0.541	-9.79	-31.352	-21.831	-34.707	-12.815	-25.457	-14.307	-1.269	-17.958	-13.76	-30.652	-31.46	-0.839	-10.112	-43.308	-12.255	-11.882	-19.095	-18	-11.707	-17.296	-22.188	-48.171	-39.318	-19.778	-36.466	-70
-17.225	-0.533	-9.966	-31.335	-21.813	-34.87	-12.631	-25.948	-14.107	-1.144	-17.553	-13.965	-30.536	-31.915	-0.766	-10.396	-42.985	-12.542	-12.006	-19.16	-18.146	-11.616	-17.432	-22.404	-48.277	-39.174	-19.929	-36.558	-70
-17.425	-0.452	-10.177	-31.389	-21.819	-34.983	-12.428	-26.441	-13.895	-0.925	-17.126	-14.21	-30.404	-32.306	-0.707	-10.747	-42.71	-12.808	-12.146	-19.161	-18.311	-11.419	-17.651	-22.607	-48.338	-39.056	-20.118	-36.615	-70
-17.605	-0.332	-10.399	-31.501	-21.846	-35.061	-12.243	-26.881	-13.664	-0.643	-16.719	-14.446	-30.236	-32.598	-0.663	-11.09	-42.571	-13.018	-12.269	-19.077	-18.506	-11.131	-17.918	-22.802	-48.325	-39.008	-20.359	-36.659	-70
-17.759	-0.203	-10.587	-31.658	-21.883	-35.131	-12.105	-27.22	-13.399	-0.343	-16.372	-14.635	-30.031	-32.78	-0.629	-11.365	-42.611	-13.135	-12.367	-18.921	-18.734	-10.787	-18.196	-22.997	-48.246	-39.063	-20.664	-36.71	-70
-17.872	-0.085	-10.683	-31.855	-21.92	-35.227	-12.029	-27.428	-13.089	-0.072	-16.113	-14.763	-29.821	-32.866	-0.587	-11.546	-42.815	-13.147	-12.462	-18.737	-18.984	-10.441	-18.456	-23.198	-48.142	-39.232	-21.022	-36.776	-70
-17.925	0.014	-10.654	-32.092	-21.955	-35.376	-12.016	-27.498	-12.73	0.125	-15.959	-14.84	-29.648	-32.887	-0.517	-11.632	-43.13	-13.07	-12.587	-18.581	-19.228	-10.147	-18.69	-23.399	-48.061	-39.499	-21.404	-36.867	-70
-17.899	0.098	-10.508	-32.371	-21.998	-35.591	-12.062	-27.448	-12.335	0.221	-15.914	-14.883	-29.544	-32.881	-0.412	-11.636	-43.485	-12.945	-12.772	-18.501	-19.426	-9.941	-18.902	-23.59	-48.031	-39.825	-21.771	-36.997	-70
-17.794	0.17	-10.296	-32.686	-22.065	-35.868	-12.166	-27.323	-11.926	0.212	-15.97	-14.904	-29.516	-32.883	-0.286	-11.568	-43.825	-12.82	-13.018	-18.514	-19.541	-9.836	-19.105	-23.754	-48.041	-40.166	-22.091	-37.181	-70
-17.628	0.228	-10.08	-33.023	-22.169	-36.196	-12.33	-27.19	-11.53	0.129	-16.107	-14.901	-29.55	-32.927	-0.164	-11.439	-44.117	-12.729	-13.296	-18.602	-19.555	-9.819	-19.307	-23.869	-48.048	-40.484	-22.347	-37.424	-70
-17.441	0.272	-9.902	-33.368	-22.32	-36.564	-12.549	-27.113	-11.168	0.022	-16.303	-14.874	-29.618	-33.041	-0.072	-11.257	-44.348	-12.687	-13.552	-18.724	-19.479	-9.854	-19.508	-23.907	-47.988	-40.746	-22.538	-37.708	-70
-17.274	0.308	-9.763	-33.707	-22.52	-36.967	-12.801	-27.135	-10.853	-0.061	-16.543	-14.837	-29.701	-33.241	-0.021	-11.033	-44.511	-12.684	-13.736	-18.83	-19.356	-9.899	-19.696	-23.834	-47.81	-40.925	-22.676	-38.005	-70
-17.161	0.35	-9.638	-34.028	-22.771	-37.39	-13.047	-27.254	-10.59	-0.091	-16.819	-14.815	-29.793	-33.522	-0.012	-10.78	-44.595	-12.699	-13.82	-18.887	-19.255	-9.914	-19.841	-23.627	-47.492	-40.991	-22.769	-38.289	-70
-17.117	0.416	-9.508	-34.318	-23.073	-37.799	-13.244	-27.422	-10.38	-0.076	-17.133	-14.837	-29.899	-33.855	-0.039	-10.513	-44.59	-12.707	-13.819	-18.887	-19.245	-9.881	-19.909	-23.281	-47.065	-40.931	-22.816	-38.549	-70
-17.144	0.51	-9.382	-34.563	-23.426	-38.145	-13.368	-27.569	-10.226	-0.053	-17.483	-14.908	-30.03	-34.192	-0.095	-10.247	-44.492	-12.687	-13.776	-18.852	-19.371	-9.802	-19.872	-22.824	-46.608	-40.754	-22.808	-38.788	-70
-17.235	0.614	-9.296	-34.745	-23.821	-38.374	-13.419	-27.639	-10.129	-0.074	-17.855	-15.009	-30.191	-34.484	-0.162	-10.003	-44.307	-12.639	-13.743	-18.813	-19.629	-9.698	-19.726	-22.312	-46.224	-40.504	-22.738	-39.018	-70
-17.379	0.693	-9.28	-34.851	-24.235	-38.464	-13.422	-27.616	-10.092	-0.172	-18.221	-15.099	-30.379	-34.699	-0.222	-9.812	-44.054	-12.578	-13.754	-18.8	-19.965	-9.597	-19.499	-21.813	-45.997	-40.248	-22.615	-39.244	-70
-17.567	0.716	-9.333	-34.879	-24.635	-38.427	-13.409	-27.532	-10.12	-0.346	-18.537	-15.142	-30.579	-34.831	-0.255	-9.704	-43.762	-12.537	-13.811	-18.823	-20.293	-9.522	-19.239	-21.395	-45.957	-40.051	-22.464	-39.469	-70
-17.779	0.671	-9.42	-34.842	-24.981	-38.313	-13.403	-27.449	-10.214	-0.556	-18.766	-15.115	-30.765	-34.891	-0.25	-9.701	-43.47	-12.553	-13.894	-18.877	-20.529	-9.5	-19.003	-21.104	-46.074	-39.958	-22.315	-39.691	-70
-17.99	0.572	-9.492	-34.763	-25.243	-38.183	-13.404	-27.43	-10.377	-0.746	-18.883	-15.02	-30.912	-34.904	-0.213	-9.805	-43.222	-12.646	-13.966	-18.947	-20.625	-9.549	-18.834	-20.956	-46.283	-39.983	-22.189	-39.899	-70
-18.173	0.449	-9.521	-34.671	-25.403	-38.092	-13.387	-27.506	-10.603	-0.869	-18.894	-14.873	-31.004	-34.893	-0.161	-9.988	-43.062	-12.806	-13.995	-19.009	-20.584	-9.68	-18.75	-20.932	-46.517	-40.117	-22.098	-40.077	-70
-18.314	0.336	-9.515	-34.591	-25.459	-38.079	-13.311	-27.665	-10.878	-0.907	-18.829	-14.699	-31.042	-34.879	-0.108	-10.197	-43.018	-12.985	-13.954	-19.038	-20.457	-9.879	-18.739	-20.991	-46.731	-40.339	-22.041	-40.209	-70
-18.412	0.261	-9.509	-34.537	-25.419	-38.162	-13.141	-27.86	-11.175	-0.87	-18.737	-14.527	-31.046	-34.877	-0.066	-10.36	-43.094	-13.119	-13.836	-19.003	-20.317	-10.104	-18.753	-21.085	-46.911	-40.621	-22.017	-40.285	-70
-18.478	0.237	-9.546	-34.511	-25.295	-38.335	-12.861	-28.032	-11.457	-0.778	-18.663	-14.378	-31.049	-34.893	-0.037	-10.414	-43.264	-13.152	-13.657	-18.876	-20.229	-10.294	-18.728	-21.184	-47.058	-40.93	-22.026	-40.31	-70
-18.52	0.265	-9.645	-34.501	-25.105	-38.575	-12.494	-28.135	-11.684	-0.65	-18.636	-14.266	-31.078	-34.922	-0.019	-10.329	-43.48	-13.057	-13.45	-18.645	-20.225	-10.39	-18.61	-21.287	-47.187	-41.229	-22.064	-40.304	-70
-18.533	0.338	-9.804	-34.495	-24.867	-38.842	-12.088	-28.158	-11.819	-0.493	-18.665	-14.19	-31.144	-34.95	-0.004	-10.124	-43.688	-12.842	-13.256	-18.326	-20.297	-10.362	-18.385	-21.415	-47.316	-41.477	-22.12	-40.293	-70
-18.499	0.448	-9.999	-34.492	-24.605	-39.098	-11.707	-28.127	-11.846	-0.31	-18.742	-14.143	-31.24	-34.964	0.019	-9.868	-43.84	-12.539	-13.103	-17.969	-20.407	-10.217	-18.096	-21.586	-47.466	-41.638	-22.181	-40.306	-70
-18.41	0.587	-10.201	-34.5	-24.341	-39.311	-11.406	-28.088	-11.77	-0.104	-18.849	-14.122	-31.351	-34.951	0.062	-9.65	-43.905	-12.184	-12.991	-17.646	-20.508	-9.992	-17.82	-21.796	-47.652	-41.691	-22.235	-40.367	-70
-18.278	0.745	-10.388	-34.536	-24.095	-39.46	-11.207	-28.085	-11.621	0.113	-18.971	-14.134	-31.461	-34.908	0.126	-9.55	-43.883	-11.807	-12.896	-17.429	-20.568	-9.734	-17.628	-22.006	-47.881	-41.646	-22.278	-40.489	-70
-18.154	0.91	-10.538	-34.601	-23.877	-39.533	-11.103	-28.129	-11.443	0.321	-19.104	-14.189	-31.566	-34.839	0.196	-9.603	-43.796	-11.428	-12.779	-17.37	-20.575	-9.487	-17.551	-22.166	-48.15	-41.546	-22.305	-40.669	-70
-18.104	1.061	-10.63	-34.668	-23.693	-39.524	-11.062	-28.2	-11.281	0.495	-19.252	-14.292	-31.664	-34.755	0.244	-9.8	-43.683	-11.061	-12.617	-17.485	-20.538	-9.285	-17.569	-22.242	-48.445	-41.456	-22.315	-40.888	-70
-18.181	1.176	-10.642	-34.692	-23.548	-39.429	-11.047	-28.252	-11.165	0.615	-19.42	-14.438	-31.756	-34.675	0.24	-10.096	-43.587	-10.721	-12.41	-17.744	-20.474	-9.156	-17.629	-22.236	-48.754	-41.441	-22.303	-41.119	-70
-18.392	1.245	-10.558	-34.63	-23.444	-39.252	-11.031	-28.252	-11.101	0.67	-19.601	-14.615	-31.838	-34.627	0.17	-10.433	-43.544	-10.424	-12.191	-18.084	-20.394	-9.118	-17.681	-22.184	-49.067	-41.543	-22.262	-41.341	-70
-18.692	1.266	-10.386	-34.465	-23.387	-39.013	-11.001	-28.199	-11.067	0.658	-19.773	-14.803	-31.905	-34.635	0.043	-10.754	-43.574	-10.194	-12.007	-18.43	-20.3	-9.175	-17.695	-22.132	-49.378	-41.766	-22.195	-41.547	-70
-19.001	1.25	-10.166	-34.218	-23.384	-38.744	-10.954	-28.131	-11.025	0.579	-19.912	-14.981	-31.955	-34.708	-0.118	-11.016	-43.671	-10.055	-11.9	-18.718	-20.188	-9.311	-17.669	-22.115	-49.667	-42.075	-22.109	-41.739	-70
-19.24	1.21	-9.963	-33.937	-23.442	-38.481	-10.891	-28.102	-10.933	0.442	-20.004	-15.119	-31.995	-34.822	-0.28	-11.197	-43.814	-10.026	-11.895	-18.919	-20.052	-9.498	-17.616	-22.141	-49.897	-42.408	-22.023	-41.927	-70
-19.368	1.154	-9.842	-33.677	-23.563	-38.257	-10.812	-28.153	-10.772	0.262	-20.053	-15.18	-32.039	-34.929	-0.419	-11.297	-43.965	-10.105	-11.992	-19.037	-19.888	-9.702	-17.56	-22.197	-50.022	-42.697	-21.963	-42.118	-70
-19.388	1.087	-9.841	-33.476	-23.747	-38.098	-10.721	-28.287	-10.561	0.062	-20.068	-15.133	-32.101	-34.975	-0.518	-11.339	-44.097	-10.272	-12.161	-19.091	-19.701	-9.902	-17.522	-22.267	-50.008	-42.896	-21.952	-42.314	-70
-19.34	1.013	-9.958	-33.341	-23.981	-38.02	-10.636	-28.469	-10.357	-0.136	-20.051	-14.975	-32.188	-34.925	-0.569	-11.36	-44.198	-10.489	-12.352	-19.107	-19.502	-10.09	-17.526	-22.349	-49.856	-42.992	-22.004	-42.516	-70
-19.272	0.938	-10.16	-33.257	-24.244	-38.036	-10.584	-28.648	-10.226	-0.325	-19.988	-14.743	-32.301	-34.78	-0.577	-11.396	-44.286	-10.715	-12.508	-19.101	-19.309	-10.272	-17.589	-22.457	-49.606	-43.011	-22.113	-42.72	-70
-19.224	0.873	-10.401	-33.203	-24.498	-38.147	-10.593	-28.779	-10.211	-0.504	-19.863	-14.51	-32.43	-34.576	-0.553	-11.471	-44.386	-10.904	-12.583	-19.076	-19.15	-10.446	-17.713	-22.608	-49.326	-42.993	-22.253	-42.918	-70
-19.216	0.831	-10.644	-33.172	-24.701	-38.331	-10.678	-28.844	-10.318	-0.675	-19.664	-14.353	-32.557	-34.369	-0.516	-11.585	-44.523	-11.018	-12.562	-19.027	-19.052	-10.596	-17.886	-22.809	-49.09	-42.971	-22.388	-43.094	-70
-19.248	0.828	-10.86	-33.177	-24.82	-38.541	-10.835	-28.85	-10.52	-0.83	-19.402	-14.323	-32.662	-34.215	-0.482	-11.717	-44.701	-11.027	-12.473	-18.933	-19.035	-10.686	-18.082	-23.039	-48.952	-42.956	-22.482	-43.228	-70
-19.307	0.87	-11.034	-33.245	-24.836	-38.715	-11.042	-28.819	-10.781	-0.949	-19.106	-14.414	-32.722	-34.154	-0.455	-11.839	-44.901	-10.921	-12.37	-18.771	-19.111	-10.672	-18.271	-23.251	-48.935	-42.943	-22.509	-43.306	-70
-19.38	0.954	-11.154	-33.395	-24.752	-38.797	-11.265	-28.77	-11.062	-1.01	-18.82	-14.568	-32.715	-34.194	-0.432	-11.929	-45.086	-10.722	-12.318	-18.523	-19.283	-10.524	-18.429	-23.386	-49.033	-42.923	-22.462	-43.33	-70
-19.459	1.071	-11.216	-33.63	-24.587	-38.755	-11.469	-28.71	-11.332	-0.994	-18.589	-14.7	-32.617	-34.307	-0.409	-11.979	-45.219	-10.481	-12.361	-18.188	-19.545	-10.246	-18.547	-23.404	-49.218	-42.896	-22.353	-43.311	-70
-19.542	1.214	-11.221	-33.922	-24.371	-38.591	-11.619	-28.634	-11.552	-0.894	-18.444	-14.737	-32.405	-34.43	-0.382	-12.002	-45.279	-10.262	-12.503	-17.788	-19.888	-9.877	-18.629	-23.305	-49.458	-42.869	-22.205	-43.27	-70
-19.631	1.384	-11.174	-34.231	-24.136	-38.34	-11.695	-28.533	-11.685	-0.713	-18.39	-14.663	-32.063	-34.495	-0.354	-12.009	-45.279	-10.12	-12.711	-17.368	-20.291	-9.476	-18.683	-23.132	-49.725	-42.852	-22.055	-43.227	-70
-19.728	1.59	-11.09	-34.511	-23.921	-38.051	-11.691	-28.407	-11.701	-0.468	-18.407	-14.515	-31.598	-34.453	-0.326	-12.003	-45.26	-10.081	-12.933	-16.984	-20.716	-9.105	-18.707	-22.96	-50.003	-42.845	-21.939	-43.199	-70
-19.834	1.838	-10.988	-34.735	-23.758	-37.777	-11.631	-28.266	-11.606	-0.185	-18.449	-14.378	-31.045	-34.296	-0.295	-11.972	-45.276	-10.14	-13.125	-16.69	-21.108	-8.806	-18.684	-22.859	-50.281	-42.848	-21.88	-43.193	-70
-19.953	2.119	-10.893	-34.895	-23.672	-37.563	-11.559	-28.123	-11.443	0.102	-18.467	-14.334	-30.466	-34.06	-0.258	-11.9	-45.364	-10.265	-13.264	-16.519	-21.406	-8.603	-18.59	-22.869	-50.545	-42.861	-21.878	-43.208	-70
-20.093	2.412	-10.827	-35.005	-23.668	-37.434	-11.527	-27.988	-11.283	0.364	-18.428	-14.431	-29.936	-33.806	-0.22	-11.78	-45.529	-10.412	-13.353	-16.485	-21.562	-8.497	-18.409	-22.989	-50.776	-42.888	-21.908	-43.229	-70
-20.267	2.678	-10.805	-35.084	-23.728	-37.4	-11.573	-27.862	-11.194	0.583	-18.329	-14.66	-29.517	-33.591	-0.189	-11.625	-45.737	-10.541	-13.403	-16.572	-21.559	-8.476	-18.151	-23.185	-50.948	-42.938	-21.936	-43.239	-70
-20.477	2.876	-10.823	-35.153	-23.826	-37.455	-11.707	-27.745	-11.217	0.76	-18.207	-14.963	-29.252	-33.451	-0.18	-11.464	-45.934	-10.616	-13.428	-16.744	-21.426	-8.526	-17.858	-23.42	-51.037	-43.02	-21.934	-43.23	-70
-20.707	2.963	-10.87	-35.226	-23.936	-37.571	-11.901	-27.642	-11.357	0.907	-18.112	-15.253	-29.15	-33.391	-0.196	-11.334	-46.079	-10.618	-13.432	-16.954	-21.228	-8.629	-17.593	-23.662	-51.031	-43.134	-21.898	-43.202	-70
-20.922	2.916	-10.926	-35.321	-24.044	-37.708	-12.102	-27.564	-11.588	1.046	-18.089	-15.45	-29.201	-33.39	-0.231	-11.268	-46.157	-10.535	-13.411	-17.15	-21.033	-8.776	-17.423	-23.897	-50.929	-43.27	-21.841	-43.17	-70
-21.081	2.734	-10.982	-35.448	-24.145	-37.817	-12.257	-27.522	-11.874	1.19	-18.153	-15.507	-29.37	-33.411	-0.266	-11.279	-46.192	-10.377	-13.355	-17.299	-20.891	-8.961	-17.394	-24.123	-50.74	-43.413	-21.785	-43.144	-70
-21.153	2.454	-11.04	-35.608	-24.23	-37.86	-12.334	-27.516	-12.181	1.342	-18.286	-15.414	-29.612	-33.419	-0.284	-11.359	-46.232	-10.174	-13.259	-17.391	-20.807	-9.186	-17.518	-24.336	-50.475	-43.538	-21.744	-43.124	-70
-21.128	2.142	-11.106	-35.782	-24.288	-37.831	-12.344	-27.537	-12.486	1.49	-18.452	-15.19	-29.877	-33.399	-0.275	-11.48	-46.323	-9.973	-13.129	-17.447	-20.745	-9.455	-17.764	-24.531	-50.146	-43.624	-21.714	-43.095	-70
-21.014	1.873	-11.177	-35.933	-24.301	-37.755	-12.322	-27.571	-12.784	1.622	-18.623	-14.868	-30.123	-33.355	-0.247	-11.598	-46.485	-9.823	-12.985	-17.5	-20.645	-9.761	-18.071	-24.702	-49.776	-43.653	-21.68	-43.036	-70
-20.825	1.71	-11.236	-36.024	-24.262	-37.677	-12.31	-27.608	-13.079	1.734	-18.784	-14.488	-30.325	-33.31	-0.224	-11.672	-46.7	-9.761	-12.854	-17.586	-20.457	-10.08	-18.361	-24.838	-49.395	-43.617	-21.63	-42.931	-70
-20.574	1.68	-11.249	-36.033	-24.172	-37.642	-12.321	-27.648	-13.378	1.832	-18.932	-14.092	-30.481	-33.279	-0.235	-11.676	-46.922	-9.793	-12.76	-17.725	-20.16	-10.372	-18.571	-24.932	-49.046	-43.524	-21.569	-42.777	-70
-20.276	1.773	-11.179	-35.969	-24.041	-37.668	-12.338	-27.69	-13.682	1.928	-19.064	-13.727	-30.6	-33.264	-0.311	-11.613	-47.098	-9.905	-12.712	-17.913	-19.779	-10.591	-18.661	-24.973	-48.776	-43.393	-21.517	-42.59	-70
-19.948	1.94	-11.006	-35.857	-23.877	-37.752	-12.322	-27.736	-13.973	2.022	-19.174	-13.445	-30.694	-33.25	-0.468	-11.508	-47.191	-10.067	-12.703	-18.125	-19.367	-10.704	-18.628	-24.953	-48.623	-43.25	-21.496	-42.403	-70
-19.619	2.115	-10.735	-35.734	-23.686	-37.873	-12.248	-27.782	-14.219	2.098	-19.26	-13.297	-30.768	-33.219	-0.704	-11.402	-47.191	-10.252	-12.715	-18.32	-18.984	-10.707	-18.503	-24.869	-48.606	-43.124	-21.515	-42.258	-70
-19.318	2.233	-10.4	-35.632	-23.477	-38.02	-12.115	-27.821	-14.379	2.127	-19.329	-13.312	-30.821	-33.17	-0.998	-11.332	-47.107	-10.441	-12.733	-18.467	-18.68	-10.622	-18.334	-24.734	-48.715	-43.041	-21.563	-42.202	-70
-19.067	2.252	-10.049	-35.58	-23.275	-38.193	-11.943	-27.84	-14.417	2.087	-19.401	-13.488	-30.85	-33.123	-1.314	-11.322	-46.957	-10.627	-12.747	-18.555	-18.478	-10.483	-18.174	-24.576	-48.912	-43.011	-21.613	-42.266	-70
-18.866	2.165	-9.731	-35.592	-23.116	-38.407	-11.769	-27.82	-14.322	1.979	-19.5	-13.783	-30.861	-33.119	-1.602	-11.373	-46.76	-10.812	-12.753	-18.601	-18.385	-10.32	-18.061	-24.43	-49.144	-43.036	-21.636	-42.458	-70
-18.688	1.998	-9.487	-35.665	-23.033	-38.668	-11.624	-27.742	-14.117	1.827	-19.644	-14.123	-30.861	-33.199	-1.811	-11.475	-46.527	-11.012	-12.746	-18.642	-18.397	-10.15	-18.014	-24.322	-49.364	-43.099	-21.617	-42.757	-70
-18.487	1.79	-9.35	-35.776	-23.04	-38.955	-11.527	-27.6	-13.853	1.673	-19.84	-14.425	-30.855	-33.386	-1.903	-11.61	-46.27	-11.241	-12.721	-18.711	-18.503	-9.981	-18.031	-24.257	-49.543	-43.177	-21.557	-43.115	-70
-18.221	1.576	-9.339	-35.884	-23.124	-39.22	-11.486	-27.408	-13.599	1.557	-20.074	-14.631	-30.844	-33.659	-1.863	-11.767	-46.009	-11.5	-12.679	-18.813	-18.691	-9.818	-18.09	-24.218	-49.673	-43.234	-21.477	-43.475	-70
-17.879	1.372	-9.461	-35.946	-23.257	-39.402	-11.487	-27.192	-13.415	1.5	-20.314	-14.721	-30.821	-33.955	-1.709	-11.94	-45.773	-11.768	-12.629	-18.925	-18.939	-9.674	-18.159	-24.176	-49.763	-43.234	-21.411	-43.78	-70
-17.496	1.174	-9.69	-35.937	-23.403	-39.448	-11.504	-26.988	-13.339	1.495	-20.527	-14.719	-30.787	-34.192	-1.481	-12.126	-45.6	-12.009	-12.591	-19.004	-19.216	-9.558	-18.203	-24.114	-49.813	-43.157	-21.398	-43.983	-70
-17.14	0.975	-9.97	-35.863	-23.537	-39.337	-11.508	-26.82	-13.369	1.508	-20.688	-14.673	-30.746	-34.302	-1.219	-12.313	-45.518	-12.191	-12.581	-19.015	-19.481	-9.479	-18.198	-24.034	-49.816	-43.01	-21.467	-44.048	-70
-16.892	0.773	-10.23	-35.757	-23.638	-39.083	-11.478	-26.706	-13.464	1.493	-20.794	-14.63	-30.703	-34.262	-0.955	-12.481	-45.529	-12.307	-12.602	-18.941	-19.695	-9.438	-18.14	-23.964	-49.761	-42.826	-21.624	-43.957	-70
-16.809	0.577	-10.414	-35.664	-23.694	-38.725	-11.411	-26.649	-13.556	1.406	-20.863	-14.616	-30.649	-34.101	-0.705	-12.608	-45.601	-12.372	-12.645	-18.79	-19.84	-9.441	-18.05	-23.94	-49.639	-42.657	-21.847	-43.722	-70
-16.902	0.406	-10.505	-35.629	-23.697	-38.318	-11.315	-26.652	-13.57	1.237	-20.915	-14.626	-30.568	-33.883	-0.482	-12.674	-45.678	-12.415	-12.696	-18.585	-19.918	-9.501	-17.965	-23.988	-49.457	-42.551	-22.08	-43.391	-70
-17.129	0.269	-10.525	-35.672	-23.64	-37.91	-11.209	-26.71	-13.46	1.007	-20.959	-14.635	-30.449	-33.674	-0.305	-12.677	-45.704	-12.454	-12.745	-18.354	-19.953	-9.638	-17.922	-24.105	-49.231	-42.53	-22.255	-43.04	-70
-17.419	0.162	-10.515	-35.791	-23.527	-37.545	-11.109	-26.814	-13.226	0.77	-20.981	-14.614	-30.295	-33.515	-0.2	-12.627	-45.643	-12.486	-12.794	-18.121	-19.974	-9.87	-17.937	-24.259	-48.98	-42.584	-22.314	-42.747	-70
-17.692	0.062	-10.508	-35.96	-23.367	-37.253	-11.036	-26.947	-12.923	0.583	-20.951	-14.549	-30.127	-33.413	-0.182	-12.551	-45.49	-12.488	-12.85	-17.911	-19.992	-10.199	-17.999	-24.402	-48.73	-42.679	-22.229	-42.553	-70
-17.891	-0.069	-10.51	-36.135	-23.183	-37.051	-11.006	-27.086	-12.637	0.486	-20.834	-14.441	-29.971	-33.348	-0.252	-12.479	-45.275	-12.423	-12.917	-17.742	-19.998	-10.604	-18.069	-24.49	-48.513	-42.771	-22.015	-42.451	-70
-17.996	-0.267	-10.513	-36.274	-23.005	-36.937	-11.029	-27.208	-12.447	0.485	-20.61	-14.299	-29.832	-33.297	-0.385	-12.443	-45.047	-12.262	-12.993	-17.629	-19.97	-11.041	-18.106	-24.492	-48.361	-42.824	-21.727	-42.391	-70
-18.033	-0.558	-10.511	-36.343	-22.867	-36.893	-11.104	-27.297	-12.397	0.561	-20.284	-14.132	-29.704	-33.254	-0.541	-12.466	-44.856	-11.998	-13.062	-17.577	-19.896	-11.448	-18.078	-24.388	-48.29	-42.823	-21.444	-42.321	-70
-18.058	-0.945	-10.511	-36.329	-22.804	-36.889	-11.227	-27.35	-12.481	0.678	-19.886	-13.944	-29.579	-33.229	-0.683	-12.554	-44.738	-11.664	-13.091	-17.581	-19.798	-11.768	-17.985	-24.17	-48.287	-42.775	-21.239	-42.215	-70
-18.134	-1.399	-10.534	-36.242	-22.839	-36.891	-11.39	-27.364	-12.665	0.799	-19.464	-13.743	-29.468	-33.245	-0.787	-12.691	-44.707	-11.333	-13.038	-17.637	-19.722	-11.962	-17.849	-23.836	-48.312	-42.706	-21.152	-42.089	-70
-18.301	-1.86	-10.597	-36.103	-22.977	-36.876	-11.586	-27.338	-12.9	0.901	-19.069	-13.549	-29.407	-33.323	-0.847	-12.841	-44.753	-11.093	-12.86	-17.749	-19.719	-12.023	-17.707	-23.408	-48.315	-42.646	-21.177	-41.983	-70
-18.549	-2.249	-10.694	-35.939	-23.195	-36.833	-11.799	-27.269	-13.147	0.973	-18.735	-13.392	-29.44	-33.466	-0.865	-12.958	-44.855	-11.013	-12.544	-17.93	-19.811	-11.973	-17.59	-22.934	-48.258	-42.617	-21.265	-41.924	-70
-18.827	-2.49	-10.804	-35.769	-23.451	-36.767	-12.005	-27.156	-13.378	1.018	-18.47	-13.3	-29.591	-33.657	-0.834	-13.004	-44.991	-11.107	-12.115	-18.192	-19.978	-11.842	-17.518	-22.482	-48.13	-42.62	-21.359	-41.9	-70
-19.066	-2.534	-10.897	-35.605	-23.69	-36.694	-12.169	-27.002	-13.579	1.05	-18.256	-13.289	-29.85	-33.865	-0.744	-12.961	-45.144	-11.328	-11.636	-18.526	-20.175	-11.659	-17.486	-22.126	-47.958	-42.637	-21.421	-41.867	-70
-19.21	-2.378	-10.958	-35.451	-23.871	-36.636	-12.256	-26.813	-13.74	1.09	-18.059	-13.356	-30.166	-34.053	-0.585	-12.838	-45.302	-11.587	-11.195	-18.902	-20.354	-11.435	-17.474	-21.913	-47.783	-42.65	-21.443	-41.787	-70
-19.24	-2.061	-10.991	-35.307	-23.979	-36.618	-12.238	-26.597	-13.854	1.149	-17.849	-13.484	-30.471	-34.199	-0.369	-12.668	-45.447	-11.794	-10.87	-19.278	-20.487	-11.174	-17.456	-21.846	-47.651	-42.662	-21.444	-41.652	-70
-19.182	-1.654	-11.006	-35.168	-24.03	-36.653	-12.109	-26.361	-13.909	1.234	-17.616	-13.645	-30.704	-34.298	-0.134	-12.498	-45.558	-11.894	-10.715	-19.618	-20.563	-10.885	-17.405	-21.887	-47.594	-42.704	-21.443	-41.497	-70
-19.095	-1.236	-11.006	-35.03	-24.06	-36.736	-11.891	-26.114	-13.892	1.347	-17.371	-13.802	-30.832	-34.362	0.064	-12.379	-45.609	-11.882	-10.746	-19.902	-20.579	-10.596	-17.311	-21.975	-47.624	-42.815	-21.438	-41.373	-70
-19.044	-0.871	-10.978	-34.895	-24.11	-36.839	-11.629	-25.879	-13.792	1.49	-17.141	-13.921	-30.861	-34.405	0.175	-12.343	-45.586	-11.795	-10.945	-20.121	-20.522	-10.358	-17.179	-22.062	-47.734	-43.017	-21.41	-41.313	-70
-19.077	-0.592	-10.906	-34.776	-24.202	-36.929	-11.378	-25.683	-13.611	1.662	-16.96	-13.971	-30.821	-34.438	0.178	-12.393	-45.494	-11.692	-11.266	-20.273	-20.369	-10.225	-17.026	-22.134	-47.914	-43.289	-21.332	-41.317	-70
-19.203	-0.402	-10.781	-34.688	-24.33	-36.984	-11.184	-25.554	-13.368	1.853	-16.857	-13.942	-30.746	-34.454	0.09	-12.497	-45.357	-11.632	-11.648	-20.356	-20.108	-10.23	-16.869	-22.209	-48.156	-43.582	-21.187	-41.356	-70
-19.393	-0.274	-10.618	-34.642	-24.457	-37.01	-11.067	-25.514	-13.101	2.029	-16.85	-13.846	-30.661	-34.444	-0.041	-12.603	-45.213	-11.662	-12.032	-20.374	-19.76	-10.365	-16.712	-22.319	-48.463	-43.836	-20.983	-41.394	-70
-19.589	-0.165	-10.445	-34.635	-24.531	-37.047	-11.011	-25.569	-12.858	2.145	-16.941	-13.717	-30.569	-34.397	-0.157	-12.657	-45.095	-11.809	-12.366	-20.34	-19.377	-10.58	-16.544	-22.48	-48.83	-44.01	-20.747	-41.415	-70
-19.738	-0.036	-10.296	-34.653	-24.507	-37.149	-10.98	-25.718	-12.68	2.161	-17.1	-13.6	-30.468	-34.314	-0.218	-12.623	-45.025	-12.064	-12.618	-20.266	-19.028	-10.805	-16.345	-22.686	-49.232	-44.089	-20.513	-41.433	-70
-19.811	0.137	-10.196	-34.671	-24.373	-37.356	-10.931	-25.942	-12.597	2.067	-17.28	-13.536	-30.358	-34.206	-0.214	-12.487	-45.002	-12.386	-12.77	-20.161	-18.763	-10.977	-16.103	-22.917	-49.61	-44.083	-20.315	-41.479	-70
-19.81	0.353	-10.16	-34.668	-24.158	-37.67	-10.833	-26.21	-12.614	1.884	-17.423	-13.547	-30.255	-34.102	-0.163	-12.257	-45.015	-12.705	-12.816	-20.025	-18.593	-11.059	-15.824	-23.156	-49.887	-44.018	-20.176	-41.582	-70
-19.758	0.598	-10.191	-34.627	-23.911	-38.051	-10.681	-26.48	-12.712	1.654	-17.489	-13.632	-30.189	-34.04	-0.108	-11.951	-45.046	-12.945	-12.764	-19.845	-18.499	-11.029	-15.528	-23.397	-49.995	-43.928	-20.109	-41.747	-70
-19.682	0.854	-10.272	-34.544	-23.683	-38.433	-10.488	-26.708	-12.859	1.413	-17.468	-13.775	-30.191	-34.066	-0.097	-11.602	-45.085	-13.054	-12.643	-19.61	-18.451	-10.887	-15.245	-23.642	-49.901	-43.852	-20.116	-41.953	-70
-19.596	1.107	-10.377	-34.425	-23.499	-38.746	-10.278	-26.861	-13.014	1.187	-17.389	-13.956	-30.276	-34.213	-0.162	-11.248	-45.135	-13.024	-12.502	-19.318	-18.434	-10.644	-14.998	-23.877	-49.619	-43.821	-20.188	-42.162	-70
-19.501	1.344	-10.471	-34.284	-23.354	-38.95	-10.081	-26.931	-13.148	0.984	-17.295	-14.161	-30.425	-34.493	-0.305	-10.937	-45.204	-12.89	-12.404	-18.976	-18.456	-10.33	-14.808	-24.073	-49.206	-43.852	-20.309	-42.345	-70
-19.393	1.539	-10.526	-34.143	-23.228	-39.036	-9.925	-26.936	-13.245	0.808	-17.226	-14.384	-30.598	-34.878	-0.496	-10.719	-45.3	-12.708	-12.406	-18.608	-18.532	-9.987	-14.689	-24.182	-48.737	-43.937	-20.462	-42.488	-70
-19.269	1.657	-10.532	-34.022	-23.093	-39.028	-9.826	-26.907	-13.306	0.66	-17.195	-14.623	-30.747	-35.307	-0.686	-10.635	-45.427	-12.535	-12.535	-18.243	-18.668	-9.66	-14.647	-24.162	-48.29	-44.043	-20.626	-42.595	-70
-19.132	1.661	-10.499	-33.94	-22.927	-38.954	-9.785	-26.87	-13.33	0.539	-17.19	-14.871	-30.841	-35.709	-0.83	-10.7	-45.577	-12.403	-12.774	-17.916	-18.853	-9.387	-14.68	-23.983	-47.931	-44.125	-20.782	-42.677	-70
-18.985	1.532	-10.448	-33.902	-22.712	-38.842	-9.784	-26.832	-13.31	0.441	-17.193	-15.116	-30.866	-36.025	-0.903	-10.899	-45.738	-12.32	-13.061	-17.656	-19.061	-9.196	-14.771	-23.646	-47.7	-44.142	-20.907	-42.745	-70
-18.824	1.287	-10.407	-33.901	-22.441	-38.706	-9.787	-26.784	-13.232	0.366	-17.203	-15.338	-30.819	-36.233	-0.906	-11.184	-45.901	-12.277	-13.306	-17.486	-19.273	-9.1	-14.896	-23.182	-47.614	-44.075	-20.982	-42.805	-70
-18.635	0.979	-10.393	-33.917	-22.129	-38.549	-9.758	-26.707	-13.085	0.318	-17.247	-15.518	-30.696	-36.341	-0.862	-11.494	-46.058	-12.256	-13.419	-17.409	-19.472	-9.099	-15.034	-22.652	-47.663	-43.933	-20.992	-42.858	-70
-18.398	0.67	-10.409	-33.923	-21.818	-38.367	-9.67	-26.589	-12.885	0.306	-17.375	-15.635	-30.494	-36.378	-0.795	-11.772	-46.2	-12.237	-13.346	-17.409	-19.653	-9.173	-15.17	-22.136	-47.821	-43.749	-20.933	-42.905	-70
-18.109	0.415	-10.439	-33.899	-21.564	-38.154	-9.522	-26.442	-12.675	0.339	-17.63	-15.671	-30.217	-36.366	-0.71	-11.983	-46.316	-12.202	-13.087	-17.452	-19.806	-9.297	-15.305	-21.709	-48.051	-43.57	-20.816	-42.938	-70
-17.783	0.24	-10.462	-33.84	-21.42	-37.91	-9.327	-26.299	-12.516	0.423	-18.021	-15.615	-29.887	-36.321	-0.594	-12.117	-46.388	-12.135	-12.696	-17.495	-19.931	-9.443	-15.446	-21.416	-48.316	-43.441	-20.659	-42.953	-70
-17.459	0.137	-10.465	-33.764	-21.407	-37.647	-9.11	-26.205	-12.459	0.552	-18.511	-15.474	-29.534	-36.25	-0.416	-12.179	-46.397	-12.028	-12.263	-17.503	-20.032	-9.599	-15.603	-21.262	-48.591	-43.391	-20.491	-42.95	-70
-17.173	0.075	-10.451	-33.702	-21.509	-37.393	-8.894	-26.195	-12.52	0.712	-19.035	-15.276	-29.194	-36.164	-0.164	-12.176	-46.336	-11.889	-11.881	-17.454	-20.133	-9.764	-15.785	-21.221	-48.861	-43.424	-20.342	-42.948	-70
-16.942	0.015	-10.428	-33.69	-21.676	-37.181	-8.701	-26.273	-12.67	0.88	-19.524	-15.067	-28.89	-36.088	0.148	-12.119	-46.212	-11.747	-11.611	-17.346	-20.258	-9.937	-15.996	-21.261	-49.118	-43.514	-20.245	-42.979	-70
-16.76	-0.072	-10.395	-33.748	-21.845	-37.037	-8.549	-26.411	-12.844	1.035	-19.936	-14.898	-28.638	-36.051	0.47	-12.02	-46.044	-11.643	-11.469	-17.186	-20.428	-10.104	-16.236	-21.362	-49.351	-43.622	-20.226	-43.067	-70
-16.609	-0.194	-10.338	-33.855	-21.956	-36.967	-8.455	-26.566	-12.976	1.16	-20.258	-14.804	-28.443	-36.079	0.739	-11.906	-45.853	-11.611	-11.427	-16.991	-20.639	-10.23	-16.501	-21.511	-49.547	-43.707	-20.303	-43.216	-70
-16.474	-0.34	-10.234	-33.957	-21.974	-36.953	-8.432	-26.708	-13.015	1.247	-20.499	-14.794	-28.314	-36.177	0.913	-11.808	-45.652	-11.667	-11.44	-16.786	-20.871	-10.276	-16.779	-21.704	-49.694	-43.746	-20.471	-43.399	-70
-16.358	-0.489	-10.074	-33.983	-21.896	-36.961	-8.485	-26.837	-12.946	1.304	-20.673	-14.858	-28.255	-36.324	0.993	-11.756	-45.446	-11.796	-11.466	-16.605	-21.1	-10.21	-17.049	-21.931	-49.788	-43.739	-20.701	-43.574	-70
-16.267	-0.62	-9.873	-33.888	-21.749	-36.957	-8.61	-26.984	-12.782	1.35	-20.783	-14.969	-28.267	-36.48	1.016	-11.762	-45.241	-11.966	-11.486	-16.482	-21.309	-10.021	-17.29	-22.181	-49.837	-43.703	-20.94	-43.703	-70
-16.202	-0.724	-9.671	-33.674	-21.574	-36.922	-8.791	-27.18	-12.555	1.417	-20.82	-15.102	-28.339	-36.591	1.037	-11.815	-45.053	-12.141	-11.501	-16.441	-21.5	-9.723	-17.487	-22.441	-49.852	-43.659	-21.126	-43.769	-70
-16.155	-0.803	-9.521	-33.395	-21.414	-36.851	-9.007	-27.434	-12.304	1.53	-20.767	-15.238	-28.46	-36.612	1.096	-11.879	-44.91	-12.291	-11.521	-16.487	-21.678	-9.347	-17.635	-22.69	-49.843	-43.62	-21.212	-43.781	-70
-16.114	-0.864	-9.462	-33.119	-21.296	-36.762	-9.237	-27.722	-12.06	1.696	-20.616	-15.367	-28.615	-36.514	1.208	-11.913	-44.845	-12.398	-11.549	-16.599	-21.839	-8.936	-17.741	-22.899	-49.816	-43.59	-21.182	-43.758	-70
-16.072	-0.916	-9.508	-32.899	-21.221	-36.675	-9.458	-27.993	-11.846	1.897	-20.383	-15.493	-28.793	-36.288	1.353	-11.878	-44.879	-12.454	-11.581	-16.744	-21.966	-8.528	-17.812	-23.033	-49.776	-43.566	-21.06	-43.722	-70
-16.036	-0.957	-9.642	-32.755	-21.172	-36.609	-9.65	-28.196	-11.672	2.097	-20.103	-15.626	-28.98	-35.952	1.5	-11.754	-45.01	-12.459	-11.609	-16.883	-22.033	-8.154	-17.852	-23.063	-49.727	-43.545	-20.907	-43.684	-70
-16.017	-0.978	-9.829	-32.677	-21.119	-36.572	-9.791	-28.308	-11.541	2.254	-19.827	-15.772	-29.154	-35.538	1.622	-11.539	-45.213	-12.422	-11.637	-16.993	-22.024	-7.834	-17.853	-22.982	-49.672	-43.53	-20.791	-43.646	-70
-16.02	-0.962	-10.036	-32.65	-21.038	-36.554	-9.861	-28.341	-11.455	2.344	-19.597	-15.935	-29.288	-35.093	1.707	-11.251	-45.441	-12.358	-11.682	-17.07	-21.943	-7.589	-17.805	-22.819	-49.605	-43.528	-20.77	-43.601	-70
-16.04	-0.893	-10.241	-32.66	-20.921	-36.538	-9.852	-28.327	-11.417	2.364	-19.436	-16.105	-29.349	-34.667	1.757	-10.929	-45.643	-12.284	-11.77	-17.135	-21.815	-7.443	-17.704	-22.626	-49.522	-43.542	-20.87	-43.542	-70
-16.063	-0.76	-10.441	-32.694	-20.782	-36.512	-9.771	-28.299	-11.432	2.332	-19.338	-16.269	-29.314	-34.302	1.775	-10.632	-45.779	-12.212	-11.918	-17.216	-21.673	-7.424	-17.559	-22.458	-49.426	-43.566	-21.074	-43.462	-70
-16.075	-0.561	-10.642	-32.742	-20.651	-36.479	-9.644	-28.274	-11.501	2.271	-19.286	-16.413	-29.175	-34.024	1.749	-10.423	-45.832	-12.15	-12.115	-17.335	-21.545	-7.551	-17.392	-22.353	-49.329	-43.578	-21.327	-43.354	-70
-16.07	-0.302	-10.855	-32.793	-20.553	-36.459	-9.506	-28.246	-11.617	2.202	-19.259	-16.525	-28.95	-33.831	1.66	-10.359	-45.814	-12.093	-12.32	-17.494	-21.442	-7.818	-17.234	-22.31	-49.243	-43.551	-21.549	-43.216	-70
-16.052	-0.002	-11.079	-32.841	-20.505	-36.484	-9.392	-28.193	-11.763	2.137	-19.249	-16.593	-28.682	-33.7	1.5	-10.459	-45.752	-12.032	-12.472	-17.673	-21.359	-8.189	-17.107	-22.288	-49.173	-43.467	-21.659	-43.054	-70
-16.031	0.314	-11.304	-32.896	-20.508	-36.574	-9.326	-28.09	-11.913	2.077	-19.257	-16.612	-28.427	-33.599	1.285	-10.695	-45.678	-11.962	-12.52	-17.839	-21.282	-8.604	-17.012	-22.23	-49.11	-43.327	-21.605	-42.89	-70
-16.013	0.614	-11.51	-32.973	-20.563	-36.723	-9.316	-27.919	-12.04	2.018	-19.287	-16.583	-28.24	-33.509	1.054	-10.991	-45.613	-11.888	-12.447	-17.961	-21.206	-8.997	-16.929	-22.091	-49.048	-43.154	-21.384	-42.767	-70
-16.003	0.87	-11.668	-33.091	-20.668	-36.901	-9.365	-27.683	-12.117	1.938	-19.345	-16.516	-28.159	-33.425	0.849	-11.254	-45.558	-11.833	-12.277	-18.016	-21.133	-9.318	-16.826	-21.861	-48.996	-42.99	-21.045	-42.738	-70
-15.992	1.068	-11.753	-33.251	-20.814	-37.059	-9.467	-27.4	-12.131	1.814	-19.438	-16.427	-28.185	-33.36	0.694	-11.405	-45.504	-11.826	-12.059	-17.996	-21.077	-9.546	-16.679	-21.569	-48.976	-42.88	-20.671	-42.842	-70
-15.964	1.209	-11.749	-33.425	-20.977	-37.16	-9.613	-27.103	-12.083	1.631	-19.573	-16.335	-28.297	-33.327	0.586	-11.415	-45.442	-11.883	-11.843	-17.909	-21.052	-9.684	-16.479	-21.267	-49.018	-42.86	-20.348	-43.081	-70
-15.899	1.316	-11.658	-33.562	-21.122	-37.187	-9.792	-26.829	-11.994	1.392	-19.753	-16.247	-28.459	-33.343	0.51	-11.304	-45.377	-12	-11.664	-17.785	-21.064	-9.748	-16.236	-21.006	-49.135	-42.944	-20.136	-43.413	-70
-15.785	1.414	-11.496	-33.612	-21.215	-37.146	-9.983	-26.611	-11.897	1.123	-19.977	-16.164	-28.636	-33.423	0.451	-11.127	-45.327	-12.145	-11.536	-17.668	-21.106	-9.751	-15.967	-20.82	-49.316	-43.116	-20.045	-43.773	-70
-15.62	1.526	-11.295	-33.553	-21.243	-37.056	-10.166	-26.475	-11.825	0.851	-20.234	-16.086	-28.806	-33.581	0.403	-10.946	-45.313	-12.278	-11.465	-17.602	-21.162	-9.689	-15.688	-20.718	-49.528	-43.343	-20.043	-44.093	-70
-15.415	1.654	-11.095	-33.407	-21.221	-36.939	-10.327	-26.43	-11.797	0.59	-20.503	-16.016	-28.95	-33.821	0.366	-10.812	-45.354	-12.357	-11.45	-17.607	-21.21	-9.556	-15.414	-20.685	-49.733	-43.582	-20.075	-44.324	-70
-15.19	1.778	-10.94	-33.234	-21.183	-36.815	-10.466	-26.471	-11.814	0.337	-20.76	-15.962	-29.051	-34.131	0.335	-10.756	-45.444	-12.354	-11.494	-17.673	-21.225	-9.352	-15.164	-20.689	-49.905	-43.805	-20.094	-44.445	-70
-14.973	1.864	-10.866	-33.107	-21.173	-36.7	-10.597	-26.573	-11.864	0.081	-20.982	-15.929	-29.091	-34.47	0.297	-10.805	-45.561	-12.256	-11.597	-17.763	-21.187	-9.103	-14.959	-20.692	-50.033	-44.003	-20.088	-44.453	-70
-14.793	1.88	-10.886	-33.073	-21.225	-36.616	-10.74	-26.698	-11.927	-0.178	-21.155	-15.918	-29.053	-34.78	0.236	-10.975	-45.675	-12.064	-11.746	-17.835	-21.084	-8.856	-14.816	-20.664	-50.117	-44.189	-20.073	-44.365	-70
-14.671	1.815	-10.986	-33.146	-21.357	-36.578	-10.909	-26.804	-11.981	-0.427	-21.274	-15.918	-28.927	-35.001	0.14	-11.272	-45.765	-11.79	-11.908	-17.861	-20.917	-8.661	-14.741	-20.597	-50.156	-44.381	-20.08	-44.213	-70
-14.608	1.68	-11.134	-33.299	-21.555	-36.598	-11.104	-26.86	-12.01	-0.634	-21.347	-15.909	-28.722	-35.095	0.012	-11.68	-45.83	-11.454	-12.035	-17.839	-20.697	-8.555	-14.727	-20.503	-50.148	-44.594	-20.125	-44.041	-70
-14.575	1.504	-11.289	-33.493	-21.778	-36.671	-11.311	-26.858	-12.008	-0.762	-21.388	-15.872	-28.459	-35.063	-0.138	-12.156	-45.88	-11.085	-12.073	-17.795	-20.438	-8.554	-14.756	-20.415	-50.089	-44.831	-20.203	-43.888	-70
-14.523	1.323	-11.421	-33.691	-21.973	-36.781	-11.511	-26.81	-11.98	-0.786	-21.401	-15.786	-28.175	-34.944	-0.29	-12.636	-45.923	-10.714	-11.991	-17.762	-20.153	-8.654	-14.808	-20.363	-49.979	-45.087	-20.289	-43.781	-70
-14.405	1.163	-11.51	-33.881	-22.089	-36.904	-11.684	-26.735	-11.941	-0.707	-21.381	-15.649	-27.916	-34.799	-0.435	-13.048	-45.948	-10.375	-11.797	-17.768	-19.852	-8.837	-14.874	-20.366	-49.825	-45.351	-20.357	-43.725	-70
-14.207	1.033	-11.546	-34.074	-22.103	-37.022	-11.818	-26.641	-11.912	-0.558	-21.312	-15.475	-27.722	-34.684	-0.574	-13.335	-45.921	-10.095	-11.536	-17.818	-19.548	-9.078	-14.954	-20.418	-49.642	-45.609	-20.397	-43.707	-70
-13.956	0.921	-11.52	-34.289	-22.015	-37.121	-11.91	-26.523	-11.913	-0.398	-21.187	-15.304	-27.62	-34.627	-0.717	-13.47	-45.797	-9.893	-11.272	-17.891	-19.269	-9.345	-15.053	-20.493	-49.453	-45.851	-20.417	-43.712	-70
-13.706	0.796	-11.428	-34.535	-21.849	-37.191	-11.966	-26.371	-11.963	-0.288	-21.011	-15.19	-27.617	-34.622	-0.873	-13.463	-45.546	-9.774	-11.058	-17.955	-19.058	-9.6	-15.17	-20.552	-49.284	-46.07	-20.436	-43.728	-70
-13.508	0.622	-11.27	-34.791	-21.631	-37.22	-12.004	-26.183	-12.073	-0.269	-20.807	-15.178	-27.695	-34.632	-1.037	-13.364	-45.162	-9.732	-10.915	-17.985	-18.96	-9.809	-15.294	-20.565	-49.152	-46.266	-20.467	-43.747	-70
-13.389	0.374	-11.057	-35.011	-21.383	-37.197	-12.044	-25.978	-12.241	-0.345	-20.602	-15.283	-27.824	-34.612	-1.19	-13.236	-44.684	-9.758	-10.831	-17.98	-18.995	-9.938	-15.402	-20.521	-49.066	-46.443	-20.505	-43.762	-70
-13.345	0.046	-10.812	-35.149	-21.119	-37.116	-12.1	-25.794	-12.449	-0.484	-20.416	-15.473	-27.969	-34.518	-1.308	-13.134	-44.178	-9.843	-10.773	-17.955	-19.138	-9.965	-15.473	-20.431	-49.015	-46.595	-20.537	-43.759	-70
-13.357	-0.344	-10.568	-35.177	-20.855	-36.984	-12.168	-25.676	-12.664	-0.636	-20.256	-15.69	-28.112	-34.332	-1.367	-13.081	-43.723	-9.992	-10.71	-17.934	-19.319	-9.884	-15.488	-20.336	-48.975	-46.704	-20.549	-43.722	-70
-13.412	-0.763	-10.361	-35.102	-20.615	-36.815	-12.225	-25.654	-12.857	-0.756	-20.12	-15.87	-28.251	-34.061	-1.351	-13.072	-43.38	-10.212	-10.623	-17.923	-19.45	-9.709	-15.442	-20.287	-48.924	-46.736	-20.538	-43.642	-70
-13.513	-1.17	-10.224	-34.958	-20.433	-36.626	-12.234	-25.734	-13.007	-0.82	-20.012	-15.979	-28.392	-33.738	-1.252	-13.093	-43.18	-10.512	-10.518	-17.91	-19.466	-9.472	-15.337	-20.332	-48.846	-46.658	-20.514	-43.519	-70
-13.672	-1.521	-10.177	-34.791	-20.334	-36.427	-12.157	-25.9	-13.11	-0.825	-19.942	-16.016	-28.537	-33.407	-1.073	-13.132	-43.116	-10.883	-10.413	-17.872	-19.358	-9.208	-15.185	-20.498	-48.741	-46.448	-20.494	-43.364	-70
-13.901	-1.779	-10.221	-34.637	-20.319	-36.233	-11.97	-26.128	-13.169	-0.783	-19.934	-16.008	-28.681	-33.111	-0.829	-13.193	-43.159	-11.294	-10.326	-17.793	-19.17	-8.946	-15	-20.77	-48.616	-46.108	-20.493	-43.189	-70
-14.196	-1.916	-10.329	-34.513	-20.35	-36.066	-11.673	-26.391	-13.184	-0.704	-20.015	-15.985	-28.816	-32.883	-0.553	-13.279	-43.266	-11.693	-10.262	-17.671	-18.979	-8.699	-14.797	-21.106	-48.483	-45.666	-20.527	-43.012	-70
-14.533	-1.923	-10.451	-34.413	-20.361	-35.962	-11.301	-26.67	-13.146	-0.589	-20.196	-15.967	-28.941	-32.739	-0.286	-13.389	-43.392	-12.017	-10.208	-17.51	-18.847	-8.466	-14.589	-21.447	-48.356	-45.165	-20.608	-42.85	-70
-14.875	-1.809	-10.534	-34.316	-20.288	-35.955	-10.908	-26.943	-13.038	-0.434	-20.459	-15.96	-29.06	-32.681	-0.071	-13.512	-43.497	-12.21	-10.134	-17.32	-18.799	-8.238	-14.393	-21.757	-48.248	-44.659	-20.745	-42.723	-70
-15.179	-1.603	-10.54	-34.2	-20.103	-36.061	-10.554	-27.192	-12.847	-0.233	-20.757	-15.96	-29.177	-32.704	0.06	-13.629	-43.546	-12.243	-10.011	-17.115	-18.812	-8.009	-14.237	-22.029	-48.165	-44.192	-20.935	-42.645	-70
-15.408	-1.347	-10.465	-34.05	-19.835	-36.262	-10.28	-27.403	-12.572	0.008	-21.024	-15.956	-29.287	-32.795	0.091	-13.723	-43.526	-12.127	-9.828	-16.92	-18.846	-7.781	-14.161	-22.292	-48.106	-43.795	-21.152	-42.611	-70
-15.546	-1.083	-10.331	-33.864	-19.555	-36.517	-10.096	-27.569	-12.228	0.269	-21.199	-15.934	-29.381	-32.929	0.028	-13.783	-43.45	-11.905	-9.615	-16.778	-18.867	-7.567	-14.214	-22.583	-48.059	-43.477	-21.345	-42.607	-70
-15.602	-0.839	-10.171	-33.65	-19.353	-36.769	-9.992	-27.688	-11.849	0.515	-21.248	-15.879	-29.445	-33.077	-0.105	-13.804	-43.349	-11.642	-9.436	-16.735	-18.867	-7.384	-14.423	-22.924	-48.007	-43.224	-21.45	-42.612	-70
-15.605	-0.634	-10.017	-33.422	-19.296	-36.972	-9.948	-27.759	-11.487	0.708	-21.172	-15.785	-29.475	-33.208	-0.275	-13.788	-43.256	-11.399	-9.363	-16.825	-18.858	-7.246	-14.778	-23.313	-47.932	-43.012	-21.423	-42.62	-70
-15.596	-0.475	-9.89	-33.192	-19.409	-37.096	-9.956	-27.777	-11.193	0.823	-21.003	-15.657	-29.469	-33.299	-0.447	-13.742	-43.177	-11.224	-9.44	-17.05	-18.851	-7.164	-15.221	-23.721	-47.827	-42.83	-21.253	-42.637	-70
-15.613	-0.369	-9.803	-32.971	-19.662	-37.136	-10.017	-27.741	-11.004	0.863	-20.791	-15.514	-29.432	-33.336	-0.596	-13.67	-43.092	-11.139	-9.65	-17.374	-18.843	-7.143	-15.648	-24.11	-47.694	-42.692	-20.978	-42.679	-70
-15.673	-0.315	-9.758	-32.763	-19.992	-37.104	-10.13	-27.658	-10.93	0.855	-20.586	-15.38	-29.368	-33.317	-0.708	-13.574	-42.967	-11.14	-9.921	-17.734	-18.814	-7.184	-15.951	-24.444	-47.552	-42.634	-20.667	-42.752	-70
-15.776	-0.296	-9.748	-32.566	-20.323	-37.026	-10.279	-27.557	-10.952	0.835	-20.422	-15.275	-29.285	-33.245	-0.779	-13.455	-42.784	-11.209	-10.164	-18.048	-18.746	-7.284	-16.051	-24.702	-47.425	-42.694	-20.387	-42.845	-70
-15.909	-0.273	-9.764	-32.377	-20.586	-36.934	-10.43	-27.468	-11.025	0.831	-20.309	-15.215	-29.196	-33.13	-0.812	-13.326	-42.558	-11.323	-10.312	-18.245	-18.637	-7.431	-15.932	-24.878	-47.344	-42.882	-20.187	-42.93	-70
-16.059	-0.201	-9.8	-32.196	-20.739	-36.855	-10.537	-27.414	-11.097	0.846	-20.233	-15.209	-29.116	-32.99	-0.82	-13.214	-42.335	-11.463	-10.355	-18.282	-18.503	-7.605	-15.646	-24.972	-47.333	-43.165	-20.086	-42.969	-70
-16.219	-0.046	-9.864	-32.027	-20.781	-36.805	-10.563	-27.391	-11.127	0.863	-20.164	-15.266	-29.056	-32.851	-0.819	-13.15	-42.169	-11.62	-10.347	-18.152	-18.373	-7.784	-15.285	-24.982	-47.403	-43.468	-20.076	-42.934	-70
-16.391	0.188	-9.972	-31.88	-20.745	-36.785	-10.488	-27.377	-11.098	0.852	-20.075	-15.387	-29.016	-32.743	-0.824	-13.162	-42.088	-11.783	-10.368	-17.888	-18.283	-7.946	-14.95	-24.908	-47.538	-43.705	-20.143	-42.81	-70
-16.58	0.464	-10.147	-31.768	-20.688	-36.787	-10.319	-27.339	-11.028	0.784	-19.959	-15.565	-28.989	-32.694	-0.838	-13.25	-42.086	-11.941	-10.489	-17.544	-18.259	-8.071	-14.711	-24.754	-47.702	-43.807	-20.27	-42.6	-70
-16.78	0.725	-10.398	-31.698	-20.663	-36.8	-10.079	-27.252	-10.963	0.647	-19.839	-15.783	-28.962	-32.72	-0.852	-13.395	-42.131	-12.08	-10.731	-17.181	-18.318	-8.146	-14.596	-24.539	-47.849	-43.756	-20.448	-42.311	-70
-16.972	0.923	-10.709	-31.676	-20.696	-36.822	-9.79	-27.105	-10.962	0.451	-19.758	-16.011	-28.924	-32.819	-0.85	-13.563	-42.188	-12.19	-11.057	-16.847	-18.449	-8.157	-14.593	-24.297	-47.944	-43.579	-20.672	-41.952	-70
-17.128	1.029	-11.033	-31.7	-20.766	-36.864	-9.466	-26.901	-11.068	0.233	-19.755	-16.215	-28.877	-32.977	-0.819	-13.724	-42.246	-12.269	-11.391	-16.577	-18.624	-8.099	-14.668	-24.075	-47.973	-43.337	-20.94	-41.532	-70
-17.221	1.04	-11.301	-31.762	-20.822	-36.939	-9.108	-26.655	-11.293	0.045	-19.85	-16.367	-28.833	-33.167	-0.756	-13.859	-42.312	-12.317	-11.657	-16.39	-18.802	-7.978	-14.783	-23.918	-47.939	-43.085	-21.235	-41.068	-70
-17.241	0.972	-11.443	-31.844	-20.815	-37.061	-8.711	-26.394	-11.607	-0.058	-20.035	-16.446	-28.816	-33.362	-0.671	-13.96	-42.406	-12.335	-11.816	-16.29	-18.945	-7.814	-14.902	-23.863	-47.848	-42.854	-21.527	-40.591	-70
-17.197	0.849	-11.413	-31.922	-20.718	-37.232	-8.28	-26.151	-11.957	-0.043	-20.292	-16.445	-28.846	-33.531	-0.577	-14.023	-42.533	-12.318	-11.877	-16.268	-19.034	-7.643	-14.999	-23.926	-47.698	-42.649	-21.76	-40.143	-70
-17.107	0.702	-11.214	-31.976	-20.548	-37.445	-7.837	-25.956	-12.286	0.089	-20.598	-16.367	-28.934	-33.654	-0.484	-14.051	-42.688	-12.257	-11.883	-16.301	-19.065	-7.501	-15.054	-24.091	-47.486	-42.466	-21.874	-39.771	-70
-16.989	0.562	-10.902	-31.989	-20.35	-37.688	-7.423	-25.829	-12.551	0.298	-20.932	-16.222	-29.074	-33.718	-0.395	-14.052	-42.853	-12.141	-11.88	-16.35	-19.039	-7.41	-15.065	-24.307	-47.219	-42.315	-21.822	-39.512	-70
-16.854	0.448	-10.568	-31.961	-20.177	-37.939	-7.087	-25.773	-12.736	0.521	-21.268	-16.018	-29.246	-33.729	-0.305	-14.038	-43.008	-11.969	-11.892	-16.379	-18.95	-7.372	-15.052	-24.492	-46.923	-42.223	-21.604	-39.391	-70
-16.707	0.361	-10.313	-31.898	-20.076	-38.177	-6.872	-25.769	-12.839	0.692	-21.564	-15.771	-29.424	-33.702	-0.207	-14.021	-43.14	-11.751	-11.921	-16.364	-18.791	-7.365	-15.047	-24.562	-46.633	-42.226	-21.268	-39.421	-70
-16.559	0.284	-10.205	-31.821	-20.077	-38.382	-6.795	-25.792	-12.868	0.759	-21.776	-15.504	-29.583	-33.651	-0.1	-14.011	-43.236	-11.513	-11.953	-16.314	-18.568	-7.361	-15.079	-24.461	-46.377	-42.349	-20.895	-39.601	-70
-16.43	0.201	-10.264	-31.761	-20.189	-38.538	-6.842	-25.816	-12.832	0.694	-21.872	-15.256	-29.71	-33.571	0.011	-14.008	-43.284	-11.29	-11.984	-16.261	-18.317	-7.342	-15.166	-24.187	-46.161	-42.59	-20.562	-39.912	-70
-16.339	0.113	-10.464	-31.756	-20.407	-38.641	-6.976	-25.827	-12.741	0.495	-21.848	-15.078	-29.797	-33.448	0.119	-14.006	-43.276	-11.114	-12.019	-16.243	-18.103	-7.316	-15.306	-23.786	-45.974	-42.924	-20.315	-40.311	-70
-16.291	0.047	-10.749	-31.841	-20.7	-38.69	-7.164	-25.822	-12.612	0.191	-21.731	-15.011	-29.844	-33.266	0.224	-13.992	-43.212	-11.007	-12.067	-16.273	-17.997	-7.309	-15.488	-23.332	-45.798	-43.312	-20.159	-40.731	-70
-16.272	0.041	-11.051	-32.036	-21.019	-38.688	-7.393	-25.809	-12.464	-0.163	-21.563	-15.065	-29.852	-33.031	0.327	-13.949	-43.111	-10.97	-12.129	-16.336	-18.044	-7.356	-15.692	-22.893	-45.628	-43.708	-20.064	-41.092	-70
-16.258	0.126	-11.304	-32.334	-21.297	-38.642	-7.681	-25.799	-12.316	-0.495	-21.381	-15.209	-29.82	-32.777	0.435	-13.861	-42.998	-10.986	-12.192	-16.394	-18.238	-7.476	-15.901	-22.515	-45.477	-44.063	-19.987	-41.324	-70
-16.23	0.301	-11.447	-32.71	-21.476	-38.569	-8.053	-25.796	-12.179	-0.736	-21.201	-15.382	-29.742	-32.552	0.549	-13.718	-42.904	-11.033	-12.235	-16.409	-18.52	-7.669	-16.105	-22.213	-45.37	-44.329	-19.893	-41.389	-70
-16.196	0.536	-11.437	-33.122	-21.521	-38.487	-8.519	-25.802	-12.058	-0.839	-21.024	-15.525	-29.613	-32.397	0.67	-13.515	-42.853	-11.095	-12.236	-16.36	-18.807	-7.915	-16.306	-21.985	-45.328	-44.461	-19.767	-41.289	-70
-16.191	0.78	-11.267	-33.527	-21.433	-38.41	-9.04	-25.813	-11.945	-0.793	-20.846	-15.609	-29.428	-32.336	0.802	-13.25	-42.861	-11.166	-12.181	-16.242	-19.018	-8.18	-16.51	-21.829	-45.356	-44.432	-19.62	-41.069	-70
-16.253	0.98	-10.976	-33.883	-21.248	-38.341	-9.537	-25.825	-11.831	-0.619	-20.665	-15.643	-29.193	-32.377	0.952	-12.924	-42.935	-11.255	-12.065	-16.073	-19.11	-8.421	-16.724	-21.752	-45.432	-44.248	-19.48	-40.807	-70
-16.397	1.102	-10.644	-34.141	-21.024	-38.274	-9.915	-25.838	-11.716	-0.363	-20.492	-15.655	-28.924	-32.509	1.126	-12.557	-43.068	-11.37	-11.892	-15.882	-19.082	-8.591	-16.932	-21.773	-45.52	-43.942	-19.381	-40.592	-70
-16.602	1.142	-10.362	-34.253	-20.812	-38.204	-10.106	-25.85	-11.611	-0.078	-20.339	-15.67	-28.648	-32.713	1.321	-12.179	-43.236	-11.517	-11.673	-15.699	-18.97	-8.647	-17.099	-21.923	-45.579	-43.568	-19.346	-40.501	-70
-16.811	1.126	-10.201	-34.177	-20.645	-38.133	-10.091	-25.857	-11.536	0.181	-20.22	-15.69	-28.395	-32.953	1.515	-11.832	-43.401	-11.689	-11.422	-15.549	-18.825	-8.566	-17.18	-22.227	-45.586	-43.174	-19.375	-40.581	-70
-16.956	1.097	-10.19	-33.897	-20.533	-38.076	-9.909	-25.85	-11.51	0.359	-20.137	-15.706	-28.192	-33.185	1.674	-11.554	-43.523	-11.864	-11.157	-15.445	-18.696	-8.353	-17.135	-22.69	-45.538	-42.796	-19.445	-40.83	-70
-16.985	1.098	-10.31	-33.436	-20.465	-38.051	-9.633	-25.818	-11.537	0.412	-20.094	-15.708	-28.061	-33.367	1.768	-11.361	-43.578	-12.003	-10.9	-15.383	-18.611	-8.044	-16.952	-23.282	-45.457	-42.461	-19.518	-41.202	-70
-16.879	1.142	-10.51	-32.86	-20.421	-38.068	-9.337	-25.752	-11.597	0.321	-20.092	-15.701	-28.005	-33.482	1.782	-11.253	-43.566	-12.057	-10.676	-15.354	-18.582	-7.695	-16.648	-23.934	-45.382	-42.186	-19.546	-41.617	-70
-16.661	1.21	-10.724	-32.258	-20.383	-38.122	-9.067	-25.651	-11.649	0.109	-20.137	-15.699	-28.009	-33.541	1.724	-11.217	-43.507	-11.985	-10.51	-15.346	-18.61	-7.369	-16.268	-24.552	-45.364	-41.978	-19.495	-41.99	-70
-16.386	1.258	-10.897	-31.712	-20.331	-38.195	-8.841	-25.516	-11.654	-0.16	-20.23	-15.715	-28.039	-33.579	1.612	-11.235	-43.427	-11.773	-10.42	-15.352	-18.691	-7.125	-15.865	-25.049	-45.449	-41.836	-19.358	-42.257	-70
-16.126	1.245	-10.996	-31.282	-20.247	-38.263	-8.653	-25.351	-11.583	-0.405	-20.361	-15.743	-28.06	-33.636	1.468	-11.289	-43.345	-11.449	-10.409	-15.38	-18.813	-7.001	-15.485	-25.378	-45.662	-41.746	-19.166	-42.38	-70
-15.954	1.159	-11.023	-30.998	-20.113	-38.301	-8.495	-25.169	-11.435	-0.559	-20.505	-15.761	-28.05	-33.734	1.306	-11.361	-43.266	-11.078	-10.456	-15.448	-18.947	-7.018	-15.158	-25.547	-45.999	-41.693	-18.977	-42.346	-70
-15.928	1.029	-11.002	-30.873	-19.918	-38.294	-8.373	-24.993	-11.231	-0.592	-20.623	-15.744	-28.005	-33.866	1.132	-11.432	-43.185	-10.744	-10.53	-15.58	-19.055	-7.168	-14.891	-25.608	-46.421	-41.667	-18.854	-42.161	-70
-16.072	0.914	-10.959	-30.909	-19.666	-38.234	-8.309	-24.861	-11.001	-0.514	-20.672	-15.68	-27.931	-34	0.953	-11.491	-43.097	-10.52	-10.594	-15.792	-19.098	-7.42	-14.682	-25.622	-46.878	-41.673	-18.835	-41.845	-70
-16.377	0.873	-10.905	-31.099	-19.381	-38.119	-8.324	-24.811	-10.774	-0.36	-20.621	-15.586	-27.835	-34.099	0.773	-11.535	-43.003	-10.449	-10.626	-16.077	-19.055	-7.731	-14.527	-25.631	-47.318	-41.725	-18.925	-41.429	-70
-16.796	0.932	-10.824	-31.422	-19.103	-37.951	-8.426	-24.859	-10.574	-0.175	-20.469	-15.492	-27.717	-34.146	0.598	-11.571	-42.915	-10.527	-10.624	-16.414	-18.931	-8.051	-14.429	-25.635	-47.702	-41.83	-19.093	-40.956	-70
-17.26	1.079	-10.685	-31.83	-18.873	-37.729	-8.598	-24.993	-10.418	0.002	-20.248	-15.429	-27.573	-34.151	0.428	-11.609	-42.842	-10.713	-10.596	-16.772	-18.759	-8.337	-14.396	-25.606	-48.009	-41.973	-19.291	-40.473	-70
-17.695	1.259	-10.47	-32.248	-18.714	-37.453	-8.795	-25.171	-10.32	0.147	-20.016	-15.408	-27.407	-34.144	0.259	-11.654	-42.796	-10.937	-10.56	-17.127	-18.583	-8.554	-14.428	-25.52	-48.234	-42.115	-19.464	-40.024	-70
-18.037	1.401	-10.181	-32.592	-18.625	-37.122	-8.965	-25.346	-10.292	0.251	-19.842	-15.418	-27.228	-34.153	0.086	-11.707	-42.784	-11.122	-10.528	-17.465	-18.44	-8.669	-14.517	-25.375	-48.385	-42.201	-19.569	-39.648	-70
-18.247	1.444	-9.855	-32.793	-18.588	-36.76	-9.066	-25.484	-10.337	0.322	-19.777	-15.437	-27.048	-34.185	-0.097	-11.764	-42.807	-11.211	-10.513	-17.767	-18.345	-8.668	-14.637	-25.203	-48.479	-42.192	-19.583	-39.376	-70
-18.315	1.359	-9.543	-32.817	-18.585	-36.409	-9.081	-25.572	-10.451	0.377	-19.842	-15.444	-26.868	-34.222	-0.288	-11.814	-42.857	-11.185	-10.522	-18.007	-18.289	-8.557	-14.754	-25.047	-48.53	-42.084	-19.503	-39.229	-70
-18.254	1.164	-9.295	-32.668	-18.61	-36.134	-9.027	-25.613	-10.613	0.435	-20.016	-15.426	-26.681	-34.237	-0.477	-11.851	-42.913	-11.075	-10.564	-18.145	-18.253	-8.374	-14.84	-24.949	-48.54	-41.923	-19.345	-39.214	-70
-18.098	0.908	-9.143	-32.388	-18.668	-35.985	-8.946	-25.617	-10.787	0.51	-20.243	-15.38	-26.475	-34.214	-0.645	-11.866	-42.945	-10.947	-10.64	-18.147	-18.221	-8.178	-14.878	-24.928	-48.488	-41.788	-19.129	-39.319	-70
-17.884	0.653	-9.091	-32.033	-18.76	-35.973	-8.889	-25.593	-10.931	0.604	-20.453	-15.306	-26.248	-34.158	-0.774	-11.855	-42.928	-10.875	-10.746	-18.001	-18.197	-8.024	-14.873	-24.982	-48.34	-41.756	-18.875	-39.511	-70
-17.644	0.452	-9.119	-31.668	-18.869	-36.06	-8.898	-25.546	-11.007	0.699	-20.58	-15.208	-26.02	-34.09	-0.857	-11.812	-42.844	-10.908	-10.865	-17.735	-18.201	-7.939	-14.84	-25.094	-48.068	-41.865	-18.593	-39.748	-70
-17.406	0.334	-9.191	-31.347	-18.967	-36.169	-8.988	-25.478	-10.991	0.764	-20.587	-15.086	-25.819	-34.034	-0.909	-11.733	-42.694	-11.038	-10.975	-17.415	-18.252	-7.914	-14.795	-25.236	-47.673	-42.104	-18.291	-39.994	-70
-17.192	0.303	-9.272	-31.1	-19.019	-36.222	-9.142	-25.397	-10.884	0.762	-20.477	-14.941	-25.676	-34.007	-0.961	-11.613	-42.49	-11.204	-11.048	-17.121	-18.351	-7.921	-14.751	-25.378	-47.205	-42.418	-17.975	-40.231	-70
-17.019	0.337	-9.339	-30.931	-19.006	-36.179	-9.315	-25.309	-10.709	0.671	-20.29	-14.77	-25.601	-34.004	-1.043	-11.443	-42.256	-11.319	-11.069	-16.921	-18.471	-7.932	-14.714	-25.487	-46.752	-42.74	-17.651	-40.452	-70
-16.895	0.4	-9.389	-30.825	-18.936	-36.045	-9.461	-25.226	-10.507	0.496	-20.091	-14.569	-25.584	-34.009	-1.168	-11.214	-42.014	-11.317	-11.034	-16.846	-18.57	-7.942	-14.698	-25.539	-46.407	-43.014	-17.331	-40.651	-70
-16.816	0.443	-9.436	-30.755	-18.845	-35.869	-9.549	-25.159	-10.325	0.274	-19.94	-14.343	-25.602	-34.003	-1.313	-10.931	-41.787	-11.184	-10.959	-16.882	-18.612	-7.962	-14.726	-25.521	-46.235	-43.207	-17.034	-40.815	-70
-16.754	0.418	-9.5	-30.699	-18.786	-35.708	-9.575	-25.115	-10.206	0.064	-19.87	-14.108	-25.636	-33.975	-1.433	-10.624	-41.592	-10.961	-10.869	-16.978	-18.583	-8.006	-14.826	-25.443	-46.246	-43.307	-16.793	-40.925	-70
-16.674	0.3	-9.596	-30.648	-18.818	-35.609	-9.554	-25.092	-10.184	-0.073	-19.877	-13.896	-25.675	-33.938	-1.475	-10.353	-41.438	-10.721	-10.79	-17.069	-18.496	-8.069	-15.011	-25.329	-46.399	-43.318	-16.64	-40.966	-70
-16.546	0.1	-9.725	-30.609	-18.986	-35.593	-9.499	-25.076	-10.269	-0.095	-19.922	-13.739	-25.724	-33.918	-1.406	-10.187	-41.328	-10.53	-10.747	-17.104	-18.376	-8.131	-15.266	-25.216	-46.625	-43.254	-16.606	-40.938	-70
-16.36	-0.134	-9.874	-30.596	-19.305	-35.658	-9.41	-25.046	-10.452	0.008	-19.95	-13.66	-25.787	-33.951	-1.225	-10.172	-41.269	-10.42	-10.754	-17.061	-18.249	-8.163	-15.542	-25.125	-46.86	-43.138	-16.708	-40.859	-70
-16.137	-0.337	-10.012	-30.636	-19.744	-35.791	-9.276	-24.984	-10.695	0.209	-19.919	-13.667	-25.862	-34.055	-0.964	-10.306	-41.266	-10.387	-10.82	-16.948	-18.121	-8.151	-15.774	-25.057	-47.06	-42.993	-16.946	-40.759	-70
-15.913	-0.453	-10.109	-30.754	-20.235	-35.972	-9.088	-24.886	-10.952	0.458	-19.809	-13.754	-25.938	-34.217	-0.675	-10.531	-41.321	-10.414	-10.944	-16.786	-17.985	-8.106	-15.915	-24.987	-47.202	-42.838	-17.306	-40.677	-70
-15.727	-0.456	-10.141	-30.974	-20.69	-36.179	-8.855	-24.769	-11.177	0.689	-19.631	-13.901	-26.009	-34.397	-0.41	-10.76	-41.423	-10.479	-11.11	-16.594	-17.828	-8.067	-15.954	-24.882	-47.285	-42.679	-17.762	-40.652	-70
-15.6	-0.358	-10.105	-31.299	-21.036	-36.391	-8.601	-24.665	-11.345	0.85	-19.416	-14.083	-26.073	-34.539	-0.208	-10.912	-41.548	-10.573	-11.289	-16.381	-17.638	-8.081	-15.915	-24.719	-47.318	-42.509	-18.27	-40.715	-70
-15.529	-0.198	-10.022	-31.701	-21.234	-36.581	-8.364	-24.605	-11.447	0.91	-19.199	-14.269	-26.134	-34.597	-0.081	-10.944	-41.663	-10.695	-11.444	-16.149	-17.418	-8.181	-15.847	-24.496	-47.306	-42.312	-18.773	-40.881	-70
-15.493	-0.03	-9.934	-32.118	-21.282	-36.723	-8.174	-24.613	-11.493	0.875	-19.006	-14.429	-26.193	-34.556	-0.021	-10.872	-41.742	-10.851	-11.544	-15.911	-17.182	-8.374	-15.789	-24.233	-47.248	-42.073	-19.208	-41.141	-70
-15.466	0.102	-9.886	-32.47	-21.199	-36.789	-8.049	-24.694	-11.498	0.786	-18.851	-14.539	-26.234	-34.436	-0.005	-10.756	-41.773	-11.041	-11.572	-15.693	-16.952	-8.638	-15.758	-23.962	-47.133	-41.786	-19.522	-41.463	-70
-15.426	0.171	-9.906	-32.69	-21.015	-36.758	-7.992	-24.842	-11.484	0.701	-18.736	-14.584	-26.236	-34.278	-0.013	-10.666	-41.758	-11.256	-11.536	-15.528	-16.75	-8.938	-15.743	-23.721	-46.952	-41.46	-19.688	-41.798	-70
-15.363	0.184	-10.003	-32.746	-20.762	-36.616	-7.999	-25.042	-11.472	0.669	-18.663	-14.555	-26.181	-34.125	-0.037	-10.647	-41.712	-11.47	-11.457	-15.447	-16.599	-9.236	-15.723	-23.544	-46.722	-41.111	-19.711	-42.09	-70
-15.271	0.173	-10.157	-32.663	-20.476	-36.377	-8.068	-25.273	-11.488	0.713	-18.632	-14.456	-26.068	-33.996	-0.079	-10.7	-41.653	-11.646	-11.358	-15.466	-16.513	-9.507	-15.683	-23.449	-46.482	-40.758	-19.622	-42.292	-70
-15.144	0.178	-10.335	-32.506	-20.201	-36.08	-8.202	-25.511	-11.55	0.821	-18.635	-14.306	-25.918	-33.885	-0.143	-10.784	-41.604	-11.739	-11.256	-15.587	-16.508	-9.743	-15.616	-23.438	-46.286	-40.422	-19.461	-42.374	-70
-14.971	0.226	-10.507	-32.353	-19.979	-35.79	-8.398	-25.724	-11.659	0.96	-18.653	-14.145	-25.76	-33.779	-0.228	-10.844	-41.582	-11.717	-11.159	-15.802	-16.594	-9.951	-15.527	-23.488	-46.172	-40.117	-19.269	-42.331	-70
-14.745	0.317	-10.653	-32.264	-19.84	-35.575	-8.635	-25.879	-11.786	1.101	-18.656	-14.031	-25.616	-33.681	-0.319	-10.838	-41.604	-11.561	-11.067	-16.096	-16.779	-10.147	-15.415	-23.565	-46.143	-39.852	-19.084	-42.187	-70
-14.473	0.425	-10.77	-32.261	-19.793	-35.489	-8.869	-25.949	-11.884	1.233	-18.611	-14.02	-25.489	-33.62	-0.391	-10.768	-41.675	-11.281	-10.976	-16.446	-17.062	-10.34	-15.274	-23.628	-46.163	-39.641	-18.945	-41.989	-70
-14.176	0.52	-10.863	-32.328	-19.829	-35.552	-9.044	-25.926	-11.9	1.361	-18.499	-14.139	-25.358	-33.635	-0.413	-10.676	-41.784	-10.912	-10.884	-16.818	-17.419	-10.517	-15.094	-23.652	-46.177	-39.5	-18.888	-41.783	-70
-13.886	0.584	-10.943	-32.425	-19.925	-35.741	-9.108	-25.824	-11.802	1.506	-18.318	-14.373	-25.193	-33.74	-0.363	-10.628	-41.906	-10.503	-10.798	-17.174	-17.805	-10.644	-14.868	-23.624	-46.13	-39.446	-18.946	-41.596	-70
-13.637	0.617	-11.012	-32.504	-20.051	-36.006	-9.037	-25.682	-11.6	1.675	-18.088	-14.667	-24.972	-33.914	-0.238	-10.685	-42.009	-10.106	-10.733	-17.477	-18.159	-10.681	-14.601	-23.545	-45.99	-39.488	-19.132	-41.421	-70
-13.451	0.631	-11.065	-32.521	-20.18	-36.282	-8.843	-25.542	-11.337	1.86	-17.843	-14.952	-24.697	-34.103	-0.059	-10.871	-42.065	-9.759	-10.711	-17.702	-18.419	-10.611	-14.31	-23.422	-45.755	-39.609	-19.423	-41.224	-70
-13.335	0.641	-11.095	-32.451	-20.284	-36.514	-8.575	-25.44	-11.075	2.029	-17.62	-15.183	-24.404	-34.256	0.137	-11.16	-42.06	-9.48	-10.742	-17.839	-18.551	-10.452	-14.019	-23.268	-45.446	-39.769	-19.757	-40.975	-70
-13.273	0.659	-11.099	-32.286	-20.343	-36.673	-8.3	-25.396	-10.861	2.151	-17.449	-15.346	-24.144	-34.351	0.305	-11.485	-41.996	-9.274	-10.816	-17.89	-18.555	-10.266	-13.757	-23.104	-45.103	-39.914	-20.052	-40.663	-70
-13.233	0.693	-11.08	-32.038	-20.348	-36.759	-8.082	-25.408	-10.712	2.206	-17.342	-15.456	-23.973	-34.401	0.416	-11.76	-41.888	-9.143	-10.894	-17.874	-18.464	-10.123	-13.548	-22.954	-44.768	-40	-20.235	-40.307	-70
-13.173	0.752	-11.047	-31.741	-20.301	-36.792	-7.955	-25.46	-10.616	2.202	-17.298	-15.534	-23.925	-34.442	0.462	-11.916	-41.76	-9.095	-10.931	-17.814	-18.33	-10.068	-13.409	-22.849	-44.478	-40.009	-20.271	-39.936	-70
-13.057	0.844	-11.006	-31.436	-20.221	-36.791	-7.917	-25.513	-10.549	2.161	-17.306	-15.59	-24.008	-34.502	0.46	-11.922	-41.643	-9.137	-10.895	-17.736	-18.202	-10.087	-13.355	-22.806	-44.256	-39.949	-20.173	-39.576	-70
-12.88	0.97	-10.952	-31.166	-20.128	-36.763	-7.932	-25.516	-10.497	2.106	-17.354	-15.62	-24.207	-34.576	0.442	-11.798	-41.576	-9.272	-10.779	-17.654	-18.111	-10.122	-13.395	-22.835	-44.114	-39.852	-19.987	-39.237	-70
-12.67	1.117	-10.874	-30.957	-20.037	-36.698	-7.954	-25.416	-10.468	2.044	-17.429	-15.615	-24.493	-34.623	0.437	-11.592	-41.593	-9.487	-10.601	-17.573	-18.07	-10.102	-13.536	-22.927	-44.055	-39.758	-19.772	-38.921	-70
-12.484	1.258	-10.765	-30.815	-19.945	-36.586	-7.949	-25.19	-10.477	1.963	-17.513	-15.569	-24.833	-34.584	0.458	-11.357	-41.705	-9.751	-10.381	-17.492	-18.078	-9.987	-13.772	-23.068	-44.073	-39.712	-19.579	-38.622	-70
-12.379	1.355	-10.629	-30.72	-19.836	-36.423	-7.904	-24.862	-10.525	1.85	-17.589	-15.49	-25.196	-34.414	0.505	-11.126	-41.894	-10.024	-10.135	-17.407	-18.119	-9.788	-14.073	-23.247	-44.158	-39.756	-19.449	-38.336	-70
-12.387	1.366	-10.482	-30.635	-19.698	-36.225	-7.83	-24.508	-10.585	1.7	-17.643	-15.388	-25.56	-34.104	0.572	-10.9	-42.112	-10.269	-9.875	-17.319	-18.172	-9.551	-14.386	-23.457	-44.284	-39.912	-19.407	-38.062	-70
-12.499	1.267	-10.336	-30.519	-19.537	-36.02	-7.748	-24.232	-10.606	1.533	-17.669	-15.273	-25.909	-33.692	0.652	-10.662	-42.298	-10.467	-9.626	-17.226	-18.213	-9.327	-14.643	-23.695	-44.418	-40.17	-19.464	-37.8	-70
-12.679	1.051	-10.194	-30.351	-19.378	-35.844	-7.671	-24.115	-10.547	1.387	-17.675	-15.158	-26.237	-33.24	0.743	-10.398	-42.404	-10.62	-9.429	-17.126	-18.227	-9.149	-14.781	-23.945	-44.522	-40.49	-19.599	-37.565	-70
-12.885	0.744	-10.045	-30.142	-19.262	-35.73	-7.603	-24.184	-10.397	1.305	-17.676	-15.061	-26.539	-32.814	0.839	-10.12	-42.408	-10.749	-9.334	-17.015	-18.211	-9.029	-14.771	-24.178	-44.568	-40.818	-19.77	-37.389	-70
-13.089	0.388	-9.885	-29.93	-19.223	-35.705	-7.537	-24.4	-10.193	1.309	-17.683	-15.008	-26.807	-32.454	0.929	-9.87	-42.315	-10.882	-9.377	-16.886	-18.182	-8.966	-14.621	-24.348	-44.548	-41.111	-19.916	-37.315	-70
-13.285	0.038	-9.732	-29.769	-19.285	-35.784	-7.464	-24.679	-10.004	1.387	-17.696	-15.03	-27.033	-32.172	1.001	-9.709	-42.153	-11.031	-9.568	-16.739	-18.165	-8.95	-14.37	-24.411	-44.47	-41.341	-19.982	-37.375	-70
-13.481	-0.257	-9.622	-29.697	-19.453	-35.97	-7.376	-24.929	-9.902	1.493	-17.712	-15.145	-27.201	-31.954	1.044	-9.694	-41.961	-11.193	-9.884	-16.576	-18.184	-8.965	-14.077	-24.338	-44.356	-41.501	-19.94	-37.575	-70
-13.69	-0.462	-9.597	-29.727	-19.718	-36.247	-7.274	-25.087	-9.931	1.562	-17.733	-15.34	-27.301	-31.776	1.05	-9.841	-41.783	-11.341	-10.277	-16.41	-18.25	-8.992	-13.805	-24.125	-44.233	-41.588	-19.792	-37.884	-70
-13.919	-0.564	-9.681	-29.847	-20.049	-36.577	-7.158	-25.13	-10.085	1.54	-17.769	-15.568	-27.328	-31.617	1.017	-10.12	-41.659	-11.446	-10.686	-16.257	-18.352	-9.003	-13.613	-23.791	-44.133	-41.603	-19.573	-38.25	-70
-14.163	-0.571	-9.866	-30.033	-20.398	-36.9	-7.029	-25.078	-10.31	1.406	-17.829	-15.768	-27.289	-31.469	0.946	-10.456	-41.617	-11.486	-11.046	-16.13	-18.46	-8.965	-13.538	-23.375	-44.08	-41.557	-19.34	-38.618	-70
-14.404	-0.514	-10.111	-30.256	-20.71	-37.144	-6.889	-24.977	-10.527	1.172	-17.906	-15.882	-27.208	-31.343	0.842	-10.763	-41.664	-11.456	-11.302	-16.029	-18.532	-8.851	-13.597	-22.923	-44.087	-41.486	-19.155	-38.948	-70
-14.619	-0.433	-10.362	-30.488	-20.937	-37.244	-6.741	-24.881	-10.666	0.879	-17.972	-15.887	-27.114	-31.261	0.714	-10.973	-41.782	-11.364	-11.418	-15.945	-18.527	-8.651	-13.777	-22.485	-44.153	-41.446	-19.071	-39.215	-70
-14.79	-0.368	-10.563	-30.69	-21.061	-37.157	-6.593	-24.83	-10.698	0.57	-17.984	-15.795	-27.04	-31.244	0.574	-11.056	-41.938	-11.22	-11.392	-15.866	-18.419	-8.378	-14.049	-22.106	-44.261	-41.494	-19.114	-39.406	-70
-14.915	-0.343	-10.681	-30.822	-21.087	-36.883	-6.465	-24.837	-10.643	0.278	-17.91	-15.649	-27.008	-31.302	0.43	-11.02	-42.096	-11.034	-11.253	-15.789	-18.208	-8.072	-14.371	-21.822	-44.396	-41.661	-19.271	-39.517	-70
-15.011	-0.368	-10.705	-30.851	-21.033	-36.463	-6.376	-24.882	-10.548	0.026	-17.746	-15.5	-27.026	-31.429	0.292	-10.896	-42.227	-10.814	-11.056	-15.733	-17.927	-7.787	-14.702	-21.658	-44.543	-41.936	-19.495	-39.553	-70
-15.106	-0.434	-10.654	-30.766	-20.918	-35.972	-6.337	-24.925	-10.463	-0.164	-17.522	-15.387	-27.096	-31.606	0.165	-10.724	-42.318	-10.579	-10.86	-15.72	-17.632	-7.571	-15.007	-21.627	-44.7	-42.274	-19.716	-39.531	-70
-15.228	-0.522	-10.559	-30.587	-20.749	-35.495	-6.345	-24.924	-10.423	-0.264	-17.291	-15.328	-27.223	-31.81	0.06	-10.542	-42.373	-10.359	-10.707	-15.764	-17.384	-7.456	-15.255	-21.73	-44.865	-42.612	-19.867	-39.486	-70
-15.391	-0.609	-10.466	-30.359	-20.531	-35.105	-6.384	-24.85	-10.433	-0.25	-17.11	-15.316	-27.42	-32.021	-0.015	-10.389	-42.4	-10.183	-10.614	-15.857	-17.229	-7.45	-15.419	-21.957	-45.038	-42.893	-19.901	-39.462	-70
-15.593	-0.672	-10.413	-30.138	-20.269	-34.845	-6.437	-24.701	-10.473	-0.113	-17.024	-15.331	-27.694	-32.225	-0.052	-10.296	-42.407	-10.066	-10.569	-15.968	-17.182	-7.545	-15.486	-22.288	-45.212	-43.079	-19.807	-39.499	-70
-15.829	-0.694	-10.425	-29.981	-19.978	-34.714	-6.501	-24.492	-10.505	0.118	-17.049	-15.353	-28.026	-32.403	-0.055	-10.289	-42.399	-9.993	-10.535	-16.064	-17.233	-7.717	-15.457	-22.702	-45.379	-43.146	-19.608	-39.62	-70
-16.093	-0.667	-10.501	-29.926	-19.691	-34.681	-6.582	-24.245	-10.487	0.383	-17.172	-15.365	-28.357	-32.534	-0.033	-10.368	-42.378	-9.928	-10.468	-16.121	-17.353	-7.934	-15.349	-23.169	-45.527	-43.079	-19.362	-39.813	-70
-16.382	-0.595	-10.616	-29.986	-19.448	-34.701	-6.688	-23.985	-10.388	0.612	-17.353	-15.359	-28.607	-32.598	-0.002	-10.504	-42.342	-9.832	-10.333	-16.127	-17.512	-8.159	-15.189	-23.655	-45.647	-42.869	-19.142	-40.041	-70
-16.684	-0.494	-10.73	-30.143	-19.292	-34.738	-6.813	-23.731	-10.208	0.752	-17.536	-15.337	-28.706	-32.579	0.015	-10.645	-42.3	-9.689	-10.125	-16.08	-17.691	-8.355	-15.003	-24.122	-45.732	-42.511	-19.016	-40.244	-70
-16.973	-0.383	-10.801	-30.357	-19.249	-34.777	-6.933	-23.512	-9.985	0.788	-17.666	-15.307	-28.636	-32.489	-0.004	-10.731	-42.267	-9.52	-9.869	-15.99	-17.877	-8.493	-14.813	-24.53	-45.786	-42.014	-19.02	-40.361	-70
-17.216	-0.281	-10.798	-30.586	-19.327	-34.821	-7.013	-23.361	-9.779	0.743	-17.703	-15.279	-28.436	-32.366	-0.081	-10.723	-42.27	-9.379	-9.61	-15.884	-18.06	-8.56	-14.64	-24.846	-45.827	-41.408	-19.148	-40.351	-70
-17.383	-0.205	-10.705	-30.8	-19.501	-34.881	-7.028	-23.318	-9.653	0.655	-17.636	-15.262	-28.185	-32.261	-0.229	-10.616	-42.335	-9.33	-9.386	-15.805	-18.232	-8.566	-14.501	-25.058	-45.896	-40.75	-19.355	-40.205	-70
-17.463	-0.157	-10.517	-30.989	-19.72	-34.968	-6.969	-23.41	-9.637	0.559	-17.49	-15.26	-27.958	-32.213	-0.455	-10.441	-42.469	-9.415	-9.215	-15.801	-18.388	-8.531	-14.41	-25.177	-46.037	-40.118	-19.582	-39.947	-70
-17.466	-0.125	-10.243	-31.151	-19.916	-35.087	-6.848	-23.646	-9.723	0.478	-17.32	-15.269	-27.794	-32.221	-0.76	-10.25	-42.65	-9.638	-9.084	-15.898	-18.536	-8.474	-14.361	-25.231	-46.282	-39.59	-19.781	-39.628	-70
-17.409	-0.075	-9.898	-31.287	-20.023	-35.246	-6.697	-24.003	-9.869	0.432	-17.198	-15.284	-27.684	-32.238	-1.133	-10.084	-42.826	-9.959	-8.968	-16.076	-18.696	-8.403	-14.338	-25.257	-46.619	-39.214	-19.932	-39.307	-70
-17.308	0.04	-9.514	-31.386	-20.006	-35.445	-6.558	-24.435	-10.026	0.439	-17.179	-15.303	-27.589	-32.201	-1.54	-9.964	-42.939	-10.318	-8.845	-16.272	-18.889	-8.306	-14.323	-25.288	-46.99	-38.99	-20.042	-39.031	-70
-17.171	0.25	-9.136	-31.435	-19.865	-35.68	-6.467	-24.884	-10.155	0.515	-17.289	-15.33	-27.474	-32.071	-1.924	-9.881	-42.95	-10.66	-8.712	-16.414	-19.124	-8.167	-14.307	-25.337	-47.312	-38.873	-20.133	-38.826	-70
-17.012	0.553	-8.818	-31.427	-19.637	-35.926	-6.447	-25.287	-10.236	0.659	-17.511	-15.376	-27.331	-31.859	-2.207	-9.811	-42.847	-10.954	-8.59	-16.456	-19.381	-7.979	-14.293	-25.399	-47.513	-38.806	-20.22	-38.692	-70
-16.848	0.896	-8.615	-31.372	-19.377	-36.146	-6.491	-25.592	-10.263	0.84	-17.797	-15.45	-27.183	-31.621	-2.322	-9.735	-42.645	-11.198	-8.515	-16.404	-19.623	-7.758	-14.286	-25.45	-47.559	-38.754	-20.304	-38.618	-70
-16.706	1.2	-8.559	-31.289	-19.131	-36.297	-6.565	-25.768	-10.236	1.005	-18.089	-15.558	-27.073	-31.424	-2.242	-9.644	-42.363	-11.414	-8.518	-16.303	-19.808	-7.54	-14.281	-25.462	-47.459	-38.72	-20.371	-38.599	-70
-16.603	1.39	-8.647	-31.199	-18.927	-36.351	-6.619	-25.803	-10.165	1.094	-18.34	-15.694	-27.041	-31.31	-1.993	-9.546	-42.021	-11.628	-8.614	-16.209	-19.911	-7.359	-14.252	-25.411	-47.253	-38.729	-20.4	-38.636	-70
-16.54	1.435	-8.845	-31.107	-18.764	-36.306	-6.607	-25.713	-10.071	1.069	-18.529	-15.846	-27.104	-31.275	-1.634	-9.455	-41.637	-11.849	-8.795	-16.151	-19.943	-7.232	-14.166	-25.289	-46.99	-38.805	-20.381	-38.743	-70
-16.497	1.353	-9.107	-31.002	-18.627	-36.186	-6.51	-25.534	-9.983	0.931	-18.652	-16.006	-27.25	-31.281	-1.228	-9.381	-41.233	-12.058	-9.031	-16.121	-19.944	-7.15	-14.005	-25.109	-46.724	-38.945	-20.317	-38.926	-70
-16.447	1.203	-9.392	-30.863	-18.495	-36.03	-6.343	-25.321	-9.934	0.713	-18.721	-16.173	-27.429	-31.283	-0.821	-9.333	-40.834	-12.205	-9.286	-16.082	-19.961	-7.094	-13.783	-24.893	-46.502	-39.127	-20.227	-39.179	-70
-16.373	1.048	-9.678	-30.67	-18.357	-35.868	-6.152	-25.138	-9.938	0.466	-18.747	-16.354	-27.57	-31.265	-0.438	-9.319	-40.464	-12.223	-9.525	-16.001	-20.022	-7.047	-13.546	-24.67	-46.362	-39.32	-20.137	-39.474	-70
-16.273	0.942	-9.952	-30.425	-18.219	-35.713	-5.994	-25.04	-9.99	0.237	-18.735	-16.559	-27.599	-31.246	-0.1	-9.346	-40.148	-12.059	-9.724	-15.866	-20.112	-7.016	-13.348	-24.456	-46.324	-39.504	-20.065	-39.768	-70
-16.157	0.921	-10.196	-30.153	-18.094	-35.561	-5.919	-25.056	-10.068	0.061	-18.688	-16.791	-27.467	-31.271	0.161	-9.416	-39.904	-11.698	-9.874	-15.698	-20.178	-7.02	-13.23	-24.254	-46.377	-39.666	-20.021	-40.007	-70
-16.037	0.999	-10.38	-29.897	-17.99	-35.4	-5.951	-25.171	-10.15	-0.042	-18.621	-17.043	-27.177	-31.377	0.307	-9.518	-39.754	-11.178	-9.968	-15.54	-20.15	-7.081	-13.195	-24.056	-46.491	-39.803	-20.007	-40.151	-70
-15.918	1.174	-10.467	-29.7	-17.899	-35.218	-6.081	-25.336	-10.229	-0.058	-18.568	-17.291	-26.783	-31.575	0.314	-9.624	-39.715	-10.578	-9.995	-15.436	-19.977	-7.198	-13.22	-23.851	-46.622	-39.914	-20.024	-40.187	-70
-15.799	1.414	-10.43	-29.59	-17.807	-35.013	-6.267	-25.486	-10.316	0.022	-18.566	-17.501	-26.374	-31.835	0.183	-9.699	-39.794	-9.998	-9.934	-15.419	-19.648	-7.348	-13.268	-23.631	-46.721	-39.997	-20.075	-40.139	-70
-15.668	1.672	-10.272	-29.57	-17.702	-34.788	-6.455	-25.576	-10.431	0.198	-18.645	-17.639	-26.04	-32.113	-0.047	-9.713	-39.985	-9.527	-9.769	-15.497	-19.202	-7.492	-13.311	-23.402	-46.729	-40.057	-20.161	-40.053	-70
-15.508	1.901	-10.019	-29.624	-17.596	-34.554	-6.599	-25.598	-10.582	0.462	-18.803	-17.678	-25.839	-32.366	-0.315	-9.663	-40.263	-9.225	-9.513	-15.657	-18.71	-7.599	-13.339	-23.179	-46.587	-40.105	-20.276	-39.979	-70
-15.307	2.078	-9.716	-29.721	-17.527	-34.326	-6.679	-25.572	-10.756	0.79	-19.011	-17.602	-25.783	-32.572	-0.555	-9.571	-40.588	-9.109	-9.219	-15.871	-18.255	-7.649	-13.365	-22.982	-46.257	-40.155	-20.404	-39.947	-70
-15.063	2.211	-9.408	-29.83	-17.537	-34.124	-6.708	-25.529	-10.918	1.14	-19.229	-17.416	-25.844	-32.727	-0.724	-9.482	-40.913	-9.152	-8.968	-16.097	-17.897	-7.641	-13.418	-22.827	-45.747	-40.223	-20.531	-39.96	-70
-14.789	2.328	-9.13	-29.928	-17.653	-33.967	-6.719	-25.485	-11.027	1.465	-19.422	-17.148	-25.973	-32.828	-0.805	-9.439	-41.194	-9.296	-8.832	-16.285	-17.657	-7.584	-13.534	-22.718	-45.118	-40.322	-20.642	-40.012	-70
-14.511	2.452	-8.905	-30	-17.873	-33.864	-6.753	-25.431	-11.061	1.724	-19.573	-16.842	-26.127	-32.87	-0.81	-9.47	-41.4	-9.467	-8.84	-16.384	-17.516	-7.497	-13.736	-22.646	-44.472	-40.458	-20.731	-40.099	-70
-14.255	2.577	-8.744	-30.05	-18.164	-33.812	-6.838	-25.347	-11.03	1.895	-19.679	-16.554	-26.281	-32.843	-0.768	-9.573	-41.523	-9.603	-8.964	-16.356	-17.429	-7.404	-14.023	-22.594	-43.914	-40.631	-20.788	-40.226	-70
-14.041	2.66	-8.651	-30.093	-18.476	-33.792	-6.978	-25.214	-10.973	1.98	-19.738	-16.327	-26.433	-32.743	-0.713	-9.721	-41.573	-9.672	-9.138	-16.188	-17.356	-7.318	-14.365	-22.55	-43.518	-40.828	-20.805	-40.4	-70
-13.876	2.642	-8.625	-30.147	-18.761	-33.78	-7.159	-25.036	-10.937	1.994	-19.746	-16.18	-26.587	-32.571	-0.674	-9.878	-41.57	-9.674	-9.291	-15.909	-17.283	-7.238	-14.71	-22.515	-43.307	-41.034	-20.771	-40.613	-70
-13.763	2.478	-8.663	-30.227	-18.984	-33.761	-7.357	-24.838	-10.953	1.953	-19.7	-16.098	-26.746	-32.339	-0.662	-10.015	-41.533	-9.638	-9.387	-15.578	-17.225	-7.145	-15.002	-22.501	-43.263	-41.23	-20.689	-40.84	-70
-13.7	2.165	-8.76	-30.33	-19.125	-33.741	-7.552	-24.655	-11.02	1.859	-19.603	-16.044	-26.907	-32.062	-0.675	-10.114	-41.469	-9.6	-9.437	-15.269	-17.216	-7.006	-15.189	-22.523	-43.341	-41.405	-20.57	-41.044	-70
-13.684	1.75	-8.907	-30.441	-19.184	-33.75	-7.737	-24.516	-11.11	1.712	-19.466	-15.973	-27.06	-31.763	-0.702	-10.178	-41.376	-9.596	-9.485	-15.037	-17.288	-6.796	-15.241	-22.589	-43.487	-41.549	-20.434	-41.191	-70
-13.707	1.308	-9.091	-30.532	-19.166	-33.819	-7.912	-24.425	-11.182	1.517	-19.3	-15.857	-27.197	-31.475	-0.731	-10.216	-41.248	-9.654	-9.58	-14.909	-17.456	-6.512	-15.153	-22.692	-43.648	-41.652	-20.303	-41.272	-70
-13.756	0.914	-9.29	-30.574	-19.084	-33.968	-8.071	-24.362	-11.205	1.296	-19.12	-15.699	-27.313	-31.235	-0.762	-10.237	-41.075	-9.79	-9.746	-14.871	-17.711	-6.178	-14.95	-22.818	-43.773	-41.704	-20.194	-41.3	-70
-13.817	0.621	-9.478	-30.546	-18.953	-34.184	-8.204	-24.298	-11.177	1.08	-18.941	-15.53	-27.404	-31.07	-0.795	-10.244	-40.845	-9.997	-9.969	-14.889	-18.025	-5.841	-14.686	-22.949	-43.823	-41.699	-20.119	-41.304	-70
-13.875	0.448	-9.623	-30.443	-18.791	-34.434	-8.293	-24.212	-11.121	0.895	-18.782	-15.388	-27.471	-30.985	-0.832	-10.235	-40.546	-10.237	-10.211	-14.922	-18.357	-5.555	-14.43	-23.069	-43.777	-41.643	-20.083	-41.303	-70
-13.916	0.384	-9.701	-30.284	-18.619	-34.681	-8.33	-24.102	-11.08	0.753	-18.666	-15.295	-27.516	-30.958	-0.861	-10.21	-40.172	-10.443	-10.428	-14.941	-18.659	-5.364	-14.244	-23.168	-43.639	-41.556	-20.082	-41.3	-70
-13.927	0.397	-9.705	-30.104	-18.46	-34.898	-8.321	-23.983	-11.086	0.661	-18.611	-15.25	-27.549	-30.951	-0.868	-10.173	-39.732	-10.552	-10.599	-14.933	-18.89	-5.292	-14.164	-23.245	-43.442	-41.463	-20.105	-41.272	-70
-13.901	0.444	-9.647	-29.947	-18.333	-35.077	-8.291	-23.874	-11.147	0.622	-18.622	-15.232	-27.581	-30.919	-0.844	-10.135	-39.254	-10.528	-10.721	-14.905	-19.024	-5.332	-14.194	-23.306	-43.234	-41.379	-20.132	-41.194	-70
-13.837	0.482	-9.551	-29.85	-18.252	-35.209	-8.264	-23.787	-11.232	0.641	-18.686	-15.218	-27.617	-30.826	-0.789	-10.111	-38.779	-10.384	-10.799	-14.871	-19.056	-5.453	-14.302	-23.363	-43.063	-41.29	-20.145	-41.055	-70
-13.739	0.48	-9.442	-29.823	-18.227	-35.289	-8.256	-23.732	-11.289	0.717	-18.774	-15.189	-27.646	-30.653	-0.713	-10.118	-38.354	-10.174	-10.82	-14.845	-18.997	-5.605	-14.438	-23.42	-42.962	-41.161	-20.139	-40.866	-70
-13.612	0.435	-9.334	-29.849	-18.265	-35.312	-8.26	-23.719	-11.267	0.835	-18.854	-15.139	-27.636	-30.411	-0.625	-10.163	-38.012	-9.966	-10.766	-14.825	-18.863	-5.737	-14.549	-23.468	-42.936	-40.951	-20.127	-40.657	-70
-13.467	0.364	-9.231	-29.888	-18.369	-35.285	-8.255	-23.752	-11.132	0.966	-18.901	-15.072	-27.556	-30.14	-0.526	-10.243	-37.771	-9.81	-10.621	-14.803	-18.671	-5.815	-14.602	-23.486	-42.968	-40.641	-20.139	-40.47	-70
-13.323	0.294	-9.137	-29.891	-18.532	-35.223	-8.219	-23.824	-10.888	1.073	-18.904	-14.991	-27.397	-29.9	-0.409	-10.328	-37.635	-9.722	-10.398	-14.773	-18.438	-5.833	-14.596	-23.456	-43.025	-40.249	-20.193	-40.342	-70
-13.208	0.247	-9.059	-29.822	-18.732	-35.143	-8.141	-23.909	-10.567	1.125	-18.862	-14.908	-27.184	-29.747	-0.272	-10.373	-37.595	-9.691	-10.131	-14.744	-18.185	-5.809	-14.564	-23.384	-43.074	-39.825	-20.287	-40.303	-70
-13.151	0.227	-9.015	-29.673	-18.932	-35.049	-8.028	-23.968	-10.223	1.107	-18.783	-14.832	-26.963	-29.711	-0.122	-10.323	-37.63	-9.685	-9.867	-14.745	-17.943	-5.772	-14.549	-23.298	-43.088	-39.431	-20.39	-40.361	-70
-13.168	0.216	-9.022	-29.472	-19.089	-34.927	-7.9	-23.972	-9.911	1.027	-18.681	-14.773	-26.774	-29.775	0.02	-10.149	-37.71	-9.674	-9.638	-14.806	-17.75	-5.751	-14.58	-23.244	-43.043	-39.114	-20.466	-40.491	-70
-13.258	0.185	-9.085	-29.28	-19.172	-34.754	-7.785	-23.911	-9.68	0.915	-18.573	-14.729	-26.617	-29.886	0.133	-9.866	-37.798	-9.633	-9.454	-14.944	-17.637	-5.762	-14.658	-23.253	-42.92	-38.898	-20.495	-40.639	-70
-13.406	0.104	-9.193	-29.162	-19.18	-34.517	-7.708	-23.797	-9.552	0.814	-18.482	-14.686	-26.45	-29.986	0.199	-9.535	-37.868	-9.543	-9.304	-15.141	-17.617	-5.799	-14.75	-23.33	-42.709	-38.78	-20.478	-40.733	-70
-13.592	-0.037	-9.316	-29.166	-19.146	-34.225	-7.688	-23.659	-9.523	0.766	-18.428	-14.623	-26.224	-30.036	0.22	-9.24	-37.906	-9.398	-9.162	-15.345	-17.677	-5.846	-14.815	-23.45	-42.416	-38.736	-20.43	-40.723	-70
-13.805	-0.219	-9.425	-29.303	-19.129	-33.905	-7.73	-23.52	-9.559	0.794	-18.429	-14.529	-25.913	-30.032	0.197	-9.052	-37.916	-9.202	-9.005	-15.485	-17.782	-5.884	-14.819	-23.571	-42.073	-38.73	-20.363	-40.611	-70
-14.038	-0.401	-9.501	-29.545	-19.18	-33.585	-7.817	-23.397	-9.62	0.896	-18.501	-14.408	-25.535	-29.998	0.13	-9.003	-37.902	-8.971	-8.831	-15.502	-17.891	-5.908	-14.753	-23.656	-41.736	-38.722	-20.281	-40.457	-70
-14.284	-0.532	-9.546	-29.84	-19.321	-33.282	-7.906	-23.296	-9.674	1.044	-18.653	-14.29	-25.135	-29.969	0.003	-9.081	-37.87	-8.737	-8.671	-15.369	-17.968	-5.928	-14.632	-23.679	-41.466	-38.681	-20.185	-40.342	-70
-14.535	-0.572	-9.57	-30.129	-19.526	-33.002	-7.944	-23.217	-9.712	1.202	-18.879	-14.209	-24.758	-29.982	-0.202	-9.252	-37.819	-8.538	-8.582	-15.11	-17.99	-5.963	-14.484	-23.631	-41.304	-38.589	-20.084	-40.323	-70
-14.774	-0.502	-9.586	-30.36	-19.735	-32.757	-7.89	-23.155	-9.749	1.339	-19.159	-14.196	-24.435	-30.058	-0.487	-9.477	-37.749	-8.412	-8.625	-14.784	-17.949	-6.033	-14.336	-23.518	-41.261	-38.447	-19.997	-40.403	-70
-14.986	-0.327	-9.598	-30.492	-19.884	-32.577	-7.739	-23.105	-9.798	1.441	-19.457	-14.261	-24.186	-30.199	-0.828	-9.72	-37.663	-8.39	-8.834	-14.47	-17.848	-6.154	-14.209	-23.355	-41.317	-38.27	-19.953	-40.525	-70
-15.155	-0.07	-9.601	-30.5	-19.931	-32.495	-7.521	-23.064	-9.863	1.515	-19.729	-14.387	-24.036	-30.38	-1.176	-9.954	-37.573	-8.481	-9.197	-14.236	-17.704	-6.335	-14.114	-23.16	-41.444	-38.081	-19.97	-40.614	-70
-15.27	0.239	-9.592	-30.376	-19.869	-32.531	-7.283	-23.035	-9.933	1.576	-19.93	-14.541	-24.009	-30.556	-1.468	-10.152	-37.5	-8.673	-9.667	-14.116	-17.543	-6.575	-14.052	-22.944	-41.622	-37.901	-20.05	-40.609	-70
-15.324	0.564	-9.568	-30.134	-19.724	-32.675	-7.059	-23.022	-9.994	1.641	-20.029	-14.681	-24.115	-30.674	-1.659	-10.284	-37.462	-8.931	-10.174	-14.105	-17.394	-6.863	-14.024	-22.714	-41.852	-37.736	-20.17	-40.489	-70
-15.315	0.876	-9.537	-29.815	-19.536	-32.882	-6.854	-23.022	-10.045	1.716	-20.007	-14.779	-24.336	-30.693	-1.724	-10.328	-37.465	-9.213	-10.647	-14.166	-17.284	-7.18	-14.029	-22.47	-42.146	-37.58	-20.292	-40.273	-70
-15.251	1.147	-9.509	-29.477	-19.346	-33.091	-6.651	-23.03	-10.102	1.788	-19.869	-14.831	-24.62	-30.592	-1.672	-10.278	-37.502	-9.479	-11.026	-14.256	-17.23	-7.498	-14.066	-22.215	-42.515	-37.419	-20.38	-40.003	-70
-15.151	1.356	-9.494	-29.177	-19.187	-33.254	-6.436	-23.04	-10.181	1.832	-19.645	-14.859	-24.906	-30.373	-1.532	-10.15	-37.549	-9.701	-11.278	-14.347	-17.236	-7.8	-14.136	-21.955	-42.954	-37.247	-20.412	-39.726	-70
-15.044	1.486	-9.497	-28.957	-19.079	-33.342	-6.222	-23.06	-10.287	1.82	-19.383	-14.9	-25.149	-30.063	-1.352	-9.979	-37.582	-9.859	-11.4	-14.438	-17.288	-8.074	-14.243	-21.7	-43.434	-37.076	-20.384	-39.482	-70
-14.966	1.542	-9.517	-28.829	-19.033	-33.35	-6.04	-23.108	-10.413	1.74	-19.138	-14.987	-25.338	-29.699	-1.186	-9.805	-37.586	-9.943	-11.417	-14.545	-17.359	-8.315	-14.389	-21.462	-43.913	-36.937	-20.299	-39.296	-70
-14.944	1.548	-9.548	-28.778	-19.042	-33.283	-5.924	-23.208	-10.546	1.606	-18.952	-15.131	-25.481	-29.325	-1.077	-9.661	-37.565	-9.952	-11.369	-14.683	-17.418	-8.51	-14.564	-21.251	-44.34	-36.864	-20.159	-39.175	-70
-14.984	1.547	-9.584	-28.773	-19.088	-33.152	-5.884	-23.368	-10.678	1.455	-18.847	-15.317	-25.595	-28.983	-1.046	-9.569	-37.531	-9.903	-11.298	-14.851	-17.443	-8.639	-14.743	-21.082	-44.671	-36.875	-19.965	-39.109	-70
-15.064	1.586	-9.626	-28.779	-19.138	-32.972	-5.889	-23.575	-10.813	1.328	-18.815	-15.51	-25.686	-28.701	-1.083	-9.533	-37.504	-9.826	-11.231	-15.026	-17.428	-8.682	-14.89	-20.972	-44.878	-36.963	-19.729	-39.076	-70
-15.144	1.684	-9.674	-28.77	-19.16	-32.765	-5.887	-23.799	-10.958	1.247	-18.824	-15.676	-25.742	-28.494	-1.157	-9.542	-37.497	-9.754	-11.182	-15.176	-17.385	-8.627	-14.968	-20.936	-44.949	-37.094	-19.477	-39.054	-70
-15.186	1.827	-9.725	-28.737	-19.13	-32.557	-5.831	-24.007	-11.11	1.214	-18.826	-15.79	-25.745	-28.365	-1.234	-9.572	-37.52	-9.705	-11.156	-15.274	-17.332	-8.485	-14.959	-20.985	-44.894	-37.217	-19.251	-39.03	-70
-15.173	1.966	-9.774	-28.687	-19.046	-32.372	-5.702	-24.177	-11.252	1.212	-18.773	-15.843	-25.678	-28.309	-1.289	-9.596	-37.582	-9.671	-11.155	-15.313	-17.29	-8.285	-14.864	-21.12	-44.739	-37.281	-19.089	-39.005	-70
-15.122	2.045	-9.815	-28.636	-18.929	-32.217	-5.517	-24.303	-11.36	1.22	-18.632	-15.843	-25.535	-28.31	-1.313	-9.591	-37.69	-9.626	-11.185	-15.306	-17.277	-8.066	-14.705	-21.332	-44.529	-37.253	-19.015	-38.988	-70
-15.07	2.026	-9.844	-28.606	-18.827	-32.089	-5.32	-24.386	-11.412	1.218	-18.405	-15.809	-25.332	-28.353	-1.297	-9.552	-37.845	-9.551	-11.246	-15.273	-17.311	-7.873	-14.514	-21.605	-44.321	-37.13	-19.027	-38.985	-70
-15.053	1.906	-9.868	-28.618	-18.796	-31.983	-5.159	-24.435	-11.404	1.191	-18.127	-15.764	-25.101	-28.418	-1.238	-9.485	-38.037	-9.444	-11.335	-15.235	-17.404	-7.745	-14.325	-21.914	-44.176	-36.941	-19.1	-38.991	-70
-15.089	1.716	-9.898	-28.683	-18.875	-31.895	-5.069	-24.467	-11.355	1.123	-17.861	-15.734	-24.885	-28.497	-1.128	-9.406	-38.242	-9.329	-11.441	-15.2	-17.559	-7.703	-14.166	-22.223	-44.136	-36.733	-19.194	-38.992	-70
-15.171	1.508	-9.941	-28.801	-19.062	-31.826	-5.06	-24.5	-11.297	1	-17.665	-15.738	-24.726	-28.596	-0.97	-9.324	-38.421	-9.241	-11.544	-15.172	-17.765	-7.751	-14.054	-22.49	-44.211	-36.553	-19.277	-38.974	-70
-15.268	1.33	-10.002	-28.956	-19.304	-31.776	-5.113	-24.548	-11.26	0.813	-17.572	-15.781	-24.651	-28.733	-0.78	-9.239	-38.535	-9.213	-11.623	-15.149	-18.003	-7.865	-13.989	-22.667	-44.371	-36.429	-19.337	-38.93	-70
-15.348	1.223	-10.077	-29.118	-19.519	-31.734	-5.191	-24.61	-11.248	0.57	-17.578	-15.858	-24.663	-28.932	-0.591	-9.146	-38.554	-9.262	-11.665	-15.133	-18.257	-8.007	-13.962	-22.721	-44.556	-36.371	-19.383	-38.871	-70
-15.387	1.212	-10.162	-29.262	-19.629	-31.685	-5.26	-24.671	-11.24	0.302	-17.65	-15.953	-24.744	-29.206	-0.447	-9.043	-38.471	-9.389	-11.668	-15.126	-18.521	-8.135	-13.958	-22.642	-44.7	-36.375	-19.434	-38.812	-70
-15.384	1.302	-10.252	-29.374	-19.596	-31.625	-5.301	-24.715	-11.197	0.058	-17.749	-16.043	-24.855	-29.546	-0.381	-8.933	-38.3	-9.579	-11.646	-15.124	-18.794	-8.218	-13.973	-22.444	-44.758	-36.434	-19.508	-38.775	-70
-15.36	1.477	-10.34	-29.462	-19.427	-31.566	-5.318	-24.738	-11.086	-0.107	-17.841	-16.1	-24.953	-29.916	-0.403	-8.836	-38.073	-9.808	-11.622	-15.118	-19.065	-8.249	-14.02	-22.161	-44.714	-36.534	-19.607	-38.779	-70
-15.345	1.701	-10.415	-29.544	-19.159	-31.535	-5.334	-24.751	-10.896	-0.156	-17.912	-16.097	-25.01	-30.258	-0.491	-8.779	-37.832	-10.042	-11.62	-15.1	-19.308	-8.238	-14.124	-21.835	-44.584	-36.651	-19.718	-38.836	-70
-15.365	1.933	-10.467	-29.632	-18.838	-31.554	-5.365	-24.776	-10.641	-0.09	-17.965	-16.018	-25.019	-30.507	-0.597	-8.789	-37.615	-10.251	-11.654	-15.065	-19.49	-8.209	-14.307	-21.51	-44.403	-36.76	-19.818	-38.943	-70
-15.417	2.137	-10.483	-29.72	-18.51	-31.624	-5.415	-24.824	-10.355	0.053	-18.01	-15.874	-24.99	-30.623	-0.667	-8.876	-37.45	-10.41	-11.714	-15.006	-19.581	-8.186	-14.566	-21.22	-44.211	-36.843	-19.879	-39.077	-70
-15.469	2.293	-10.453	-29.791	-18.213	-31.729	-5.474	-24.89	-10.083	0.213	-18.056	-15.704	-24.936	-30.601	-0.661	-9.031	-37.35	-10.505	-11.764	-14.922	-19.568	-8.175	-14.871	-20.981	-44.04	-36.905	-19.871	-39.201	-70
-15.481	2.398	-10.375	-29.829	-17.98	-31.848	-5.536	-24.956	-9.862	0.338	-18.105	-15.565	-24.863	-30.473	-0.573	-9.221	-37.313	-10.533	-11.759	-14.818	-19.461	-8.168	-15.164	-20.791	-43.9	-36.968	-19.768	-39.271	-70
-15.428	2.465	-10.256	-29.835	-17.828	-31.974	-5.609	-24.999	-9.713	0.412	-18.151	-15.507	-24.765	-30.292	-0.429	-9.404	-37.32	-10.504	-11.666	-14.706	-19.281	-8.145	-15.389	-20.643	-43.784	-37.053	-19.57	-39.251	-70
-15.326	2.523	-10.114	-29.824	-17.743	-32.119	-5.715	-24.999	-9.637	0.45	-18.189	-15.545	-24.639	-30.098	-0.279	-9.541	-37.344	-10.445	-11.484	-14.607	-19.058	-8.089	-15.504	-20.539	-43.673	-37.154	-19.313	-39.132	-70
-15.229	2.603	-9.971	-29.822	-17.691	-32.302	-5.871	-24.943	-9.62	0.484	-18.223	-15.655	-24.491	-29.918	-0.177	-9.613	-37.356	-10.392	-11.243	-14.541	-18.821	-8.002	-15.498	-20.493	-43.557	-37.232	-19.071	-38.928	-70
-15.196	2.725	-9.843	-29.848	-17.632	-32.53	-6.068	-24.826	-9.65	0.54	-18.261	-15.788	-24.334	-29.758	-0.149	-9.625	-37.334	-10.384	-10.991	-14.518	-18.592	-7.91	-15.384	-20.523	-43.44	-37.238	-18.929	-38.673	-70
-15.261	2.882	-9.731	-29.91	-17.539	-32.78	-6.268	-24.655	-9.718	0.621	-18.313	-15.886	-24.185	-29.619	-0.186	-9.605	-37.27	-10.438	-10.763	-14.531	-18.389	-7.849	-15.188	-20.635	-43.343	-37.137	-18.95	-38.408	-70
-15.409	3.041	-9.62	-30.005	-17.412	-33.006	-6.414	-24.45	-9.825	0.715	-18.383	-15.917	-24.053	-29.509	-0.246	-9.59	-37.172	-10.545	-10.57	-14.563	-18.219	-7.847	-14.929	-20.808	-43.292	-36.931	-19.146	-38.179	-70
-15.594	3.156	-9.494	-30.122	-17.277	-33.158	-6.462	-24.252	-9.964	0.811	-18.468	-15.881	-23.95	-29.441	-0.265	-9.609	-37.058	-10.67	-10.398	-14.593	-18.08	-7.908	-14.622	-21.013	-43.295	-36.656	-19.471	-38.028	-70
-15.761	3.194	-9.347	-30.25	-17.174	-33.208	-6.402	-24.106	-10.123	0.906	-18.561	-15.814	-23.895	-29.44	-0.19	-9.672	-36.952	-10.771	-10.23	-14.605	-17.967	-8	-14.284	-21.223	-43.34	-36.376	-19.839	-37.99	-70
-15.882	3.153	-9.192	-30.383	-17.15	-33.163	-6.266	-24.048	-10.281	1.01	-18.655	-15.768	-23.909	-29.528	0.005	-9.778	-36.879	-10.82	-10.058	-14.597	-17.867	-8.068	-13.946	-21.432	-43.394	-36.162	-20.159	-38.083	-70
-15.958	3.057	-9.057	-30.523	-17.226	-33.067	-6.106	-24.087	-10.425	1.136	-18.737	-15.789	-24.009	-29.713	0.302	-9.915	-36.847	-10.81	-9.899	-14.578	-17.765	-8.054	-13.648	-21.648	-43.422	-36.078	-20.366	-38.297	-70
-16.005	2.934	-8.973	-30.673	-17.394	-32.969	-5.973	-24.2	-10.557	1.287	-18.796	-15.9	-24.184	-29.977	0.646	-10.066	-36.851	-10.75	-9.779	-14.561	-17.645	-7.929	-13.424	-21.882	-43.404	-36.158	-20.449	-38.589	-70
-16.039	2.793	-8.96	-30.831	-17.606	-32.903	-5.895	-24.339	-10.693	1.463	-18.824	-16.088	-24.397	-30.273	0.962	-10.201	-36.87	-10.653	-9.725	-14.555	-17.498	-7.712	-13.289	-22.132	-43.341	-36.397	-20.439	-38.894	-70
-16.067	2.627	-9.024	-30.982	-17.805	-32.868	-5.874	-24.456	-10.841	1.653	-18.825	-16.323	-24.598	-30.54	1.179	-10.271	-36.884	-10.532	-9.741	-14.563	-17.333	-7.473	-13.229	-22.376	-43.253	-36.74	-20.389	-39.143	-70
-16.095	2.426	-9.152	-31.095	-17.948	-32.835	-5.894	-24.517	-10.986	1.842	-18.813	-16.562	-24.751	-30.724	1.259	-10.222	-36.882	-10.392	-9.81	-14.585	-17.18	-7.304	-13.214	-22.575	-43.167	-37.095	-20.334	-39.276	-70
-16.135	2.198	-9.317	-31.129	-18.03	-32.77	-5.939	-24.516	-11.095	2.01	-18.801	-16.768	-24.844	-30.795	1.206	-10.023	-36.868	-10.234	-9.892	-14.622	-17.076	-7.273	-13.211	-22.691	-43.116	-37.365	-20.27	-39.26	-70
-16.199	1.975	-9.488	-31.038	-18.073	-32.652	-5.992	-24.477	-11.128	2.142	-18.789	-16.915	-24.895	-30.752	1.065	-9.694	-36.855	-10.053	-9.946	-14.678	-17.047	-7.39	-13.197	-22.695	-43.129	-37.478	-20.167	-39.086	-70
-16.288	1.792	-9.641	-30.801	-18.104	-32.485	-6.043	-24.438	-11.067	2.233	-18.766	-16.988	-24.932	-30.622	0.894	-9.308	-36.858	-9.846	-9.936	-14.755	-17.089	-7.598	-13.165	-22.591	-43.22	-37.416	-20	-38.778	-70
-16.382	1.667	-9.766	-30.426	-18.132	-32.287	-6.078	-24.431	-10.923	2.294	-18.72	-16.983	-24.981	-30.446	0.751	-8.964	-36.885	-9.624	-9.846	-14.844	-17.167	-7.803	-13.114	-22.408	-43.376	-37.219	-19.778	-38.387	-70
-16.449	1.589	-9.867	-29.958	-18.135	-32.077	-6.08	-24.467	-10.727	2.338	-18.648	-16.895	-25.054	-30.261	0.675	-8.754	-36.943	-9.412	-9.688	-14.933	-17.229	-7.918	-13.045	-22.201	-43.559	-36.972	-19.554	-37.979	-70
-16.461	1.525	-9.956	-29.458	-18.08	-31.867	-6.043	-24.524	-10.524	2.372	-18.561	-16.723	-25.146	-30.092	0.683	-8.731	-37.033	-9.243	-9.497	-15.002	-17.235	-7.899	-12.952	-22.024	-43.72	-36.763	-19.402	-37.628	-70
-16.413	1.438	-10.033	-28.98	-17.944	-31.659	-5.972	-24.56	-10.352	2.384	-18.477	-16.464	-25.245	-29.942	0.772	-8.899	-37.148	-9.136	-9.316	-15.039	-17.179	-7.749	-12.819	-21.915	-43.814	-36.655	-19.384	-37.386	-70
-16.328	1.308	-10.084	-28.558	-17.736	-31.456	-5.892	-24.527	-10.239	2.349	-18.401	-16.122	-25.337	-29.801	0.922	-9.22	-37.27	-9.08	-9.178	-15.046	-17.088	-7.501	-12.634	-21.878	-43.821	-36.667	-19.52	-37.27	-70
-16.242	1.147	-10.086	-28.197	-17.498	-31.261	-5.832	-24.394	-10.203	2.241	-18.333	-15.717	-25.408	-29.661	1.101	-9.624	-37.374	-9.035	-9.086	-15.033	-17.01	-7.197	-12.402	-21.886	-43.737	-36.777	-19.784	-37.261	-70
-16.185	0.989	-10.02	-27.882	-17.284	-31.074	-5.816	-24.165	-10.242	2.051	-18.26	-15.295	-25.454	-29.525	1.269	-10.028	-37.435	-8.96	-9.006	-15.014	-16.988	-6.867	-12.141	-21.897	-43.575	-36.945	-20.119	-37.31	-70
-16.169	0.875	-9.886	-27.597	-17.138	-30.898	-5.848	-23.871	-10.338	1.789	-18.174	-14.918	-25.479	-29.407	1.392	-10.355	-37.445	-8.826	-8.891	-15.001	-17.047	-6.529	-11.88	-21.865	-43.362	-37.125	-20.465	-37.369	-70
-16.182	0.824	-9.706	-27.329	-17.072	-30.733	-5.911	-23.555	-10.464	1.488	-18.064	-14.642	-25.499	-29.323	1.451	-10.549	-37.417	-8.63	-8.705	-14.993	-17.187	-6.198	-11.646	-21.762	-43.135	-37.285	-20.772	-37.401	-70
-16.197	0.823	-9.512	-27.082	-17.059	-30.588	-5.979	-23.256	-10.595	1.196	-17.925	-14.485	-25.537	-29.275	1.439	-10.586	-37.37	-8.383	-8.453	-14.986	-17.393	-5.89	-11.451	-21.588	-42.941	-37.407	-21.016	-37.399	-70
-16.19	0.827	-9.337	-26.879	-17.054	-30.477	-6.024	-22.991	-10.714	0.966	-17.756	-14.425	-25.614	-29.25	1.363	-10.477	-37.316	-8.103	-8.189	-14.983	-17.639	-5.621	-11.301	-21.37	-42.818	-37.492	-21.191	-37.373	-70
-16.153	0.788	-9.206	-26.764	-17.017	-30.421	-6.032	-22.764	-10.81	0.843	-17.567	-14.403	-25.738	-29.235	1.229	-10.255	-37.253	-7.815	-7.987	-14.998	-17.896	-5.412	-11.203	-21.161	-42.777	-37.55	-21.299	-37.344	-70
-16.099	0.678	-9.141	-26.781	-16.936	-30.432	-6	-22.574	-10.875	0.855	-17.374	-14.363	-25.895	-29.231	1.045	-9.964	-37.17	-7.553	-7.912	-15.054	-18.13	-5.277	-11.171	-21.025	-42.788	-37.6	-21.345	-37.326	-70
-16.057	0.495	-9.155	-26.952	-16.825	-30.505	-5.935	-22.426	-10.903	0.996	-17.205	-14.278	-26.057	-29.259	0.818	-9.64	-37.063	-7.355	-7.974	-15.172	-18.311	-5.22	-11.229	-21.014	-42.799	-37.658	-21.329	-37.327	-70
-16.058	0.267	-9.25	-27.257	-16.709	-30.606	-5.855	-22.332	-10.894	1.23	-17.081	-14.156	-26.192	-29.344	0.563	-9.308	-36.948	-7.256	-8.137	-15.352	-18.422	-5.224	-11.393	-21.146	-42.762	-37.729	-21.247	-37.346	-70
-16.12	0.031	-9.413	-27.634	-16.603	-30.689	-5.784	-22.3	-10.864	1.493	-17.011	-14.035	-26.278	-29.495	0.306	-8.979	-36.853	-7.268	-8.339	-15.569	-18.462	-5.261	-11.664	-21.394	-42.662	-37.799	-21.091	-37.377	-70
-16.237	-0.183	-9.606	-27.989	-16.502	-30.711	-5.746	-22.328	-10.836	1.716	-16.995	-13.958	-26.307	-29.697	0.078	-8.659	-36.805	-7.384	-8.535	-15.783	-18.446	-5.298	-12.021	-21.698	-42.523	-37.841	-20.853	-37.416	-70
-16.378	-0.36	-9.783	-28.234	-16.395	-30.656	-5.753	-22.408	-10.833	1.847	-17.02	-13.95	-26.276	-29.916	-0.09	-8.357	-36.813	-7.579	-8.717	-15.949	-18.398	-5.313	-12.425	-21.99	-42.396	-37.826	-20.528	-37.46	-70
-16.503	-0.499	-9.901	-28.312	-16.284	-30.552	-5.805	-22.523	-10.876	1.87	-17.074	-14.011	-26.178	-30.113	-0.186	-8.09	-36.863	-7.826	-8.908	-16.039	-18.34	-5.305	-12.835	-22.22	-42.33	-37.735	-20.114	-37.521	-70
-16.571	-0.603	-9.944	-28.211	-16.194	-30.459	-5.889	-22.655	-10.972	1.805	-17.143	-14.12	-26.005	-30.265	-0.218	-7.882	-36.919	-8.1	-9.131	-16.039	-18.292	-5.284	-13.218	-22.367	-42.353	-37.567	-19.623	-37.615	-70
-16.559	-0.672	-9.925	-27.964	-16.159	-30.44	-5.98	-22.777	-11.116	1.692	-17.22	-14.242	-25.753	-30.355	-0.212	-7.759	-36.94	-8.379	-9.389	-15.956	-18.274	-5.255	-13.54	-22.441	-42.454	-37.337	-19.074	-37.762	-70
-16.457	-0.702	-9.886	-27.629	-16.196	-30.529	-6.052	-22.865	-11.283	1.571	-17.301	-14.344	-25.442	-30.38	-0.2	-7.737	-36.894	-8.638	-9.662	-15.811	-18.305	-5.213	-13.77	-22.47	-42.592	-37.067	-18.489	-37.972	-70
-16.266	-0.681	-9.877	-27.27	-16.29	-30.709	-6.08	-22.902	-11.433	1.467	-17.39	-14.404	-25.116	-30.337	-0.206	-7.817	-36.766	-8.845	-9.922	-15.632	-18.401	-5.151	-13.869	-22.479	-42.712	-36.781	-17.889	-38.239	-70
-16.002	-0.602	-9.938	-26.942	-16.402	-30.916	-6.049	-22.895	-11.527	1.382	-17.497	-14.417	-24.825	-30.235	-0.244	-7.98	-36.566	-8.968	-10.153	-15.458	-18.557	-5.076	-13.806	-22.483	-42.772	-36.489	-17.296	-38.543	-70
-15.696	-0.469	-10.082	-26.68	-16.498	-31.075	-5.957	-22.867	-11.543	1.305	-17.631	-14.391	-24.602	-30.094	-0.312	-8.189	-36.324	-8.982	-10.358	-15.329	-18.749	-5.017	-13.574	-22.482	-42.757	-36.188	-16.738	-38.849	-70
-15.391	-0.3	-10.289	-26.508	-16.574	-31.129	-5.82	-22.85	-11.487	1.222	-17.801	-14.345	-24.451	-29.943	-0.404	-8.396	-36.079	-8.88	-10.552	-15.274	-18.93	-5.005	-13.205	-22.464	-42.687	-35.865	-16.252	-39.118	-70
-15.135	-0.127	-10.521	-26.435	-16.661	-31.061	-5.67	-22.864	-11.39	1.134	-18.007	-14.298	-24.359	-29.812	-0.515	-8.56	-35.864	-8.679	-10.742	-15.302	-19.052	-5.048	-12.771	-22.415	-42.605	-35.512	-15.882	-39.307	-70
-14.959	0.018	-10.729	-26.46	-16.796	-30.896	-5.542	-22.902	-11.281	1.061	-18.233	-14.257	-24.316	-29.715	-0.636	-8.653	-35.7	-8.419	-10.923	-15.395	-19.081	-5.12	-12.369	-22.323	-42.555	-35.138	-15.665	-39.379	-70
-14.87	0.111	-10.88	-26.569	-16.991	-30.682	-5.461	-22.936	-11.172	1.038	-18.447	-14.215	-24.326	-29.651	-0.757	-8.668	-35.586	-8.152	-11.079	-15.511	-19.013	-5.174	-12.091	-22.194	-42.562	-34.77	-15.619	-39.314	-70
-14.852	0.153	-10.959	-26.734	-17.216	-30.472	-5.427	-22.932	-11.063	1.089	-18.612	-14.156	-24.405	-29.611	-0.87	-8.61	-35.516	-7.923	-11.195	-15.607	-18.865	-5.169	-11.994	-22.042	-42.628	-34.448	-15.738	-39.115	-70
-14.883	0.165	-10.975	-26.925	-17.412	-30.3	-5.42	-22.87	-10.945	1.216	-18.701	-14.059	-24.555	-29.584	-0.968	-8.487	-35.484	-7.762	-11.26	-15.651	-18.67	-5.098	-12.085	-21.889	-42.73	-34.208	-15.988	-38.808	-70
-14.952	0.182	-10.949	-27.12	-17.521	-30.172	-5.415	-22.752	-10.816	1.389	-18.719	-13.908	-24.749	-29.576	-1.051	-8.307	-35.496	-7.684	-11.274	-15.637	-18.46	-4.994	-12.311	-21.75	-42.835	-34.074	-16.316	-38.432	-70
-15.068	0.234	-10.906	-27.308	-17.523	-30.076	-5.39	-22.601	-10.683	1.564	-18.697	-13.702	-24.93	-29.601	-1.124	-8.091	-35.562	-7.693	-11.249	-15.586	-18.257	-4.915	-12.585	-21.631	-42.912	-34.046	-16.662	-38.032	-70
-15.244	0.335	-10.866	-27.486	-17.443	-29.987	-5.35	-22.452	-10.56	1.707	-18.682	-13.457	-25.037	-29.678	-1.188	-7.877	-35.693	-7.798	-11.205	-15.527	-18.075	-4.923	-12.814	-21.532	-42.941	-34.102	-16.972	-37.642	-70
-15.486	0.477	-10.842	-27.656	-17.341	-29.892	-5.312	-22.341	-10.463	1.808	-18.71	-13.206	-25.03	-29.812	-1.242	-7.716	-35.887	-8.007	-11.164	-15.486	-17.922	-5.065	-12.937	-21.453	-42.918	-34.199	-17.217	-37.285	-70
-15.773	0.638	-10.844	-27.824	-17.28	-29.797	-5.3	-22.291	-10.409	1.883	-18.793	-12.986	-24.913	-29.986	-1.276	-7.652	-36.125	-8.328	-11.14	-15.471	-17.803	-5.356	-12.936	-21.398	-42.852	-34.283	-17.394	-36.966	-70
-16.063	0.793	-10.874	-27.996	-17.297	-29.724	-5.326	-22.312	-10.411	1.956	-18.92	-12.823	-24.73	-30.17	-1.28	-7.695	-36.378	-8.752	-11.128	-15.474	-17.721	-5.772	-12.835	-21.362	-42.753	-34.312	-17.519	-36.68	-70
-16.306	0.923	-10.932	-28.177	-17.393	-29.696	-5.384	-22.395	-10.471	2.041	-19.063	-12.726	-24.553	-30.327	-1.25	-7.821	-36.615	-9.243	-11.106	-15.48	-17.671	-6.262	-12.681	-21.326	-42.633	-34.271	-17.613	-36.414	-70
-16.457	1.019	-11.011	-28.364	-17.544	-29.728	-5.455	-22.519	-10.578	2.133	-19.187	-12.682	-24.443	-30.429	-1.189	-7.979	-36.807	-9.744	-11.038	-15.476	-17.647	-6.76	-12.521	-21.257	-42.502	-34.183	-17.693	-36.157	-70
-16.494	1.086	-11.106	-28.545	-17.717	-29.81	-5.518	-22.659	-10.705	2.205	-19.264	-12.682	-24.432	-30.46	-1.115	-8.129	-36.939	-10.183	-10.896	-15.455	-17.636	-7.205	-12.394	-21.119	-42.367	-34.094	-17.761	-35.902	-70
-16.42	1.136	-11.208	-28.701	-17.878	-29.916	-5.557	-22.792	-10.823	2.221	-19.271	-12.729	-24.506	-30.413	-1.054	-8.254	-37.004	-10.493	-10.669	-15.41	-17.622	-7.551	-12.328	-20.897	-42.24	-34.054	-17.816	-35.653	-70
-16.262	1.187	-11.301	-28.822	-17.993	-30.012	-5.562	-22.907	-10.911	2.154	-19.205	-12.844	-24.613	-30.294	-1.036	-8.372	-37.007	-10.627	-10.372	-15.332	-17.59	-7.774	-12.332	-20.608	-42.136	-34.087	-17.854	-35.432	-70
-16.065	1.252	-11.363	-28.904	-18.029	-30.073	-5.524	-23.003	-10.964	2.003	-19.08	-13.045	-24.687	-30.119	-1.086	-8.523	-36.961	-10.574	-10.037	-15.216	-17.53	-7.875	-12.4	-20.301	-42.065	-34.185	-17.87	-35.271	-70
-15.878	1.342	-11.368	-28.947	-17.971	-30.093	-5.439	-23.085	-10.993	1.792	-18.927	-13.328	-24.684	-29.913	-1.214	-8.743	-36.884	-10.355	-9.706	-15.059	-17.441	-7.879	-12.503	-20.044	-42.033	-34.312	-17.866	-35.204	-70
-15.739	1.467	-11.296	-28.954	-17.827	-30.071	-5.312	-23.15	-11.02	1.568	-18.775	-13.655	-24.592	-29.701	-1.399	-9.045	-36.795	-10.023	-9.415	-14.876	-17.333	-7.827	-12.594	-19.898	-42.029	-34.424	-17.845	-35.252	-70
-15.664	1.633	-11.146	-28.932	-17.628	-30.011	-5.165	-23.191	-11.067	1.385	-18.646	-13.965	-24.437	-29.504	-1.594	-9.406	-36.705	-9.645	-9.189	-14.697	-17.231	-7.764	-12.627	-19.893	-42.032	-34.5	-17.819	-35.412	-70
-15.646	1.834	-10.944	-28.899	-17.419	-29.91	-5.034	-23.196	-11.142	1.288	-18.543	-14.191	-24.259	-29.334	-1.734	-9.773	-36.619	-9.281	-9.04	-14.553	-17.164	-7.713	-12.574	-20.015	-42.01	-34.54	-17.803	-35.66	-70
-15.67	2.037	-10.737	-28.889	-17.232	-29.769	-4.952	-23.166	-11.241	1.301	-18.457	-14.287	-24.099	-29.196	-1.764	-10.077	-36.531	-8.967	-8.965	-14.462	-17.155	-7.669	-12.432	-20.207	-41.94	-34.566	-17.801	-35.957	-70
-15.717	2.187	-10.574	-28.941	-17.087	-29.602	-4.937	-23.123	-11.349	1.418	-18.368	-14.236	-23.993	-29.088	-1.656	-10.257	-36.427	-8.713	-8.943	-14.425	-17.209	-7.605	-12.22	-20.388	-41.823	-34.599	-17.806	-36.269	-70
-15.776	2.227	-10.484	-29.086	-16.983	-29.435	-4.988	-23.106	-11.451	1.606	-18.261	-14.046	-23.97	-29.005	-1.424	-10.283	-36.299	-8.499	-8.944	-14.426	-17.299	-7.494	-11.966	-20.481	-41.688	-34.646	-17.793	-36.575	-70
-15.842	2.125	-10.461	-29.33	-16.909	-29.297	-5.08	-23.155	-11.539	1.812	-18.12	-13.752	-24.05	-28.937	-1.119	-10.168	-36.146	-8.297	-8.932	-14.453	-17.373	-7.339	-11.688	-20.45	-41.589	-34.693	-17.736	-36.872	-70
-15.908	1.898	-10.472	-29.645	-16.852	-29.199	-5.184	-23.292	-11.618	1.975	-17.937	-13.406	-24.23	-28.87	-0.804	-9.963	-35.982	-8.09	-8.888	-14.505	-17.366	-7.176	-11.397	-20.311	-41.58	-34.722	-17.623	-37.167	-70
-15.959	1.606	-10.478	-29.982	-16.809	-29.129	-5.275	-23.51	-11.699	2.046	-17.715	-13.066	-24.478	-28.795	-0.539	-9.743	-35.818	-7.886	-8.814	-14.59	-17.23	-7.06	-11.104	-20.128	-41.691	-34.718	-17.46	-37.467	-70
-15.973	1.324	-10.454	-30.28	-16.789	-29.063	-5.346	-23.773	-11.796	2	-17.47	-12.786	-24.735	-28.713	-0.354	-9.59	-35.658	-7.722	-8.732	-14.712	-16.952	-7.031	-10.829	-19.979	-41.91	-34.682	-17.268	-37.769	-70
-15.925	1.111	-10.393	-30.488	-16.809	-28.988	-5.405	-24.034	-11.91	1.842	-17.234	-12.602	-24.932	-28.631	-0.244	-9.559	-35.487	-7.64	-8.669	-14.862	-16.57	-7.098	-10.601	-19.921	-42.181	-34.623	-17.073	-38.05	-70
-15.797	0.996	-10.298	-30.586	-16.881	-28.912	-5.469	-24.248	-12.033	1.6	-17.04	-12.52	-25.022	-28.555	-0.177	-9.666	-35.276	-7.665	-8.644	-15.018	-16.155	-7.235	-10.445	-19.964	-42.426	-34.553	-16.899	-38.277	-70
-15.591	0.982	-10.176	-30.593	-17.003	-28.866	-5.549	-24.385	-12.145	1.317	-16.915	-12.514	-25.003	-28.48	-0.112	-9.883	-34.992	-7.788	-8.667	-15.157	-15.789	-7.401	-10.371	-20.073	-42.568	-34.475	-16.772	-38.417	-70
-15.333	1.065	-10.035	-30.552	-17.154	-28.878	-5.643	-24.436	-12.225	1.038	-16.868	-12.545	-24.915	-28.392	-0.017	-10.147	-34.622	-7.966	-8.74	-15.266	-15.537	-7.558	-10.373	-20.183	-42.562	-34.392	-16.715	-38.458	-70
-15.071	1.237	-9.883	-30.513	-17.308	-28.953	-5.732	-24.414	-12.259	0.8	-16.892	-12.576	-24.819	-28.271	0.118	-10.39	-34.182	-8.146	-8.864	-15.343	-15.424	-7.675	-10.432	-20.238	-42.41	-34.301	-16.742	-38.418	-70
-14.851	1.49	-9.735	-30.498	-17.446	-29.052	-5.793	-24.342	-12.246	0.624	-16.968	-12.591	-24.763	-28.116	0.278	-10.564	-33.716	-8.283	-9.042	-15.39	-15.441	-7.732	-10.529	-20.212	-42.164	-34.205	-16.856	-38.339	-70
-14.702	1.804	-9.602	-30.497	-17.563	-29.116	-5.811	-24.243	-12.199	0.514	-17.073	-12.597	-24.763	-27.956	0.43	-10.657	-33.284	-8.352	-9.275	-15.409	-15.548	-7.711	-10.642	-20.128	-41.898	-34.116	-17.038	-38.267	-70
-14.625	2.143	-9.493	-30.469	-17.665	-29.089	-5.784	-24.131	-12.138	0.453	-17.176	-12.616	-24.799	-27.835	0.54	-10.682	-32.936	-8.351	-9.554	-15.399	-15.695	-7.608	-10.74	-20.04	-41.678	-34.057	-17.259	-38.231	-70
-14.597	2.452	-9.408	-30.368	-17.749	-28.961	-5.725	-24.007	-12.085	0.413	-17.246	-12.664	-24.83	-27.794	0.592	-10.662	-32.697	-8.289	-9.86	-15.363	-15.833	-7.431	-10.785	-20.009	-41.537	-34.051	-17.491	-38.237	-70
-14.582	2.674	-9.345	-30.166	-17.804	-28.778	-5.656	-23.866	-12.06	0.375	-17.265	-12.739	-24.815	-27.84	0.598	-10.619	-32.56	-8.184	-10.162	-15.306	-15.931	-7.208	-10.747	-20.07	-41.468	-34.115	-17.709	-38.275	-70
-14.554	2.76	-9.303	-29.869	-17.813	-28.627	-5.604	-23.707	-12.077	0.342	-17.235	-12.809	-24.726	-27.943	0.59	-10.567	-32.509	-8.058	-10.425	-15.235	-15.985	-6.975	-10.617	-20.218	-41.439	-34.239	-17.893	-38.333	-70
-14.498	2.688	-9.283	-29.522	-17.768	-28.595	-5.598	-23.532	-12.136	0.346	-17.178	-12.834	-24.556	-28.049	0.604	-10.517	-32.529	-7.937	-10.626	-15.159	-16.015	-6.769	-10.418	-20.412	-41.42	-34.395	-18.02	-38.415	-70
-14.418	2.476	-9.288	-29.186	-17.674	-28.726	-5.665	-23.35	-12.225	0.429	-17.127	-12.787	-24.331	-28.11	0.659	-10.473	-32.617	-7.853	-10.758	-15.081	-16.046	-6.622	-10.196	-20.599	-41.404	-34.54	-18.066	-38.535	-70
-14.33	2.176	-9.318	-28.916	-17.547	-28.994	-5.819	-23.164	-12.318	0.619	-17.108	-12.673	-24.097	-28.102	0.748	-10.431	-32.778	-7.841	-10.835	-15.009	-16.097	-6.556	-9.997	-20.735	-41.406	-34.644	-18.016	-38.704	-70
-14.263	1.85	-9.369	-28.744	-17.401	-29.32	-6.055	-22.976	-12.386	0.903	-17.13	-12.533	-23.911	-28.039	0.844	-10.375	-33.01	-7.93	-10.877	-14.952	-16.169	-6.579	-9.858	-20.799	-41.459	-34.704	-17.877	-38.91	-70
-14.251	1.543	-9.436	-28.669	-17.242	-29.604	-6.345	-22.788	-12.4	1.226	-17.181	-12.422	-23.814	-27.955	0.914	-10.287	-33.303	-8.129	-10.896	-14.926	-16.245	-6.687	-9.809	-20.793	-41.58	-34.744	-17.687	-39.112	-70
-14.316	1.272	-9.508	-28.669	-17.071	-29.77	-6.635	-22.602	-12.346	1.516	-17.231	-12.384	-23.808	-27.885	0.93	-10.158	-33.629	-8.411	-10.894	-14.946	-16.301	-6.851	-9.869	-20.73	-41.766	-34.795	-17.501	-39.25	-70
-14.467	1.029	-9.573	-28.71	-16.894	-29.8	-6.86	-22.425	-12.221	1.719	-17.249	-12.436	-23.859	-27.846	0.873	-9.994	-33.955	-8.719	-10.871	-15.019	-16.313	-7.023	-10.044	-20.624	-41.991	-34.878	-17.369	-39.276	-70
-14.677	0.81	-9.619	-28.764	-16.728	-29.725	-6.957	-22.266	-12.035	1.822	-17.216	-12.568	-23.909	-27.836	0.739	-9.805	-34.241	-8.986	-10.835	-15.136	-16.264	-7.151	-10.313	-20.488	-42.212	-34.987	-17.307	-39.175	-70
-14.895	0.628	-9.636	-28.813	-16.595	-29.603	-6.892	-22.134	-11.809	1.853	-17.133	-12.755	-23.907	-27.843	0.533	-9.601	-34.452	-9.158	-10.806	-15.273	-16.152	-7.195	-10.623	-20.33	-42.391	-35.1	-17.291	-38.974	-70
-15.051	0.509	-9.621	-28.858	-16.516	-29.482	-6.679	-22.036	-11.564	1.851	-17.026	-12.969	-23.827	-27.855	0.282	-9.383	-34.565	-9.213	-10.808	-15.394	-15.997	-7.135	-10.905	-20.166	-42.494	-35.181	-17.276	-38.725	-70
-15.093	0.476	-9.585	-28.912	-16.504	-29.386	-6.376	-21.972	-11.324	1.843	-16.937	-13.187	-23.679	-27.863	0.022	-9.149	-34.575	-9.167	-10.844	-15.462	-15.835	-6.978	-11.099	-20.022	-42.495	-35.199	-17.212	-38.48	-70
-15.009	0.53	-9.547	-28.994	-16.556	-29.324	-6.069	-21.934	-11.107	1.838	-16.909	-13.388	-23.488	-27.863	-0.205	-8.905	-34.497	-9.062	-10.899	-15.448	-15.708	-6.744	-11.176	-19.927	-42.378	-35.132	-17.076	-38.269	-70
-14.846	0.65	-9.53	-29.112	-16.655	-29.303	-5.833	-21.908	-10.933	1.83	-16.968	-13.557	-23.285	-27.843	-0.367	-8.669	-34.37	-8.949	-10.941	-15.342	-15.647	-6.469	-11.147	-19.904	-42.138	-34.974	-16.875	-38.104	-70
-14.687	0.8	-9.548	-29.258	-16.769	-29.35	-5.705	-21.889	-10.813	1.812	-17.113	-13.694	-23.091	-27.788	-0.456	-8.469	-34.247	-8.875	-10.942	-15.162	-15.658	-6.2	-11.046	-19.955	-41.79	-34.738	-16.642	-37.979	-70
-14.613	0.94	-9.599	-29.412	-16.863	-29.496	-5.673	-21.883	-10.751	1.783	-17.312	-13.819	-22.913	-27.685	-0.488	-8.332	-34.183	-8.869	-10.898	-14.952	-15.732	-5.986	-10.912	-20.058	-41.367	-34.465	-16.42	-37.881	-70
-14.669	1.04	-9.671	-29.557	-16.915	-29.755	-5.691	-21.903	-10.737	1.745	-17.521	-13.964	-22.755	-27.536	-0.496	-8.266	-34.216	-8.933	-10.83	-14.765	-15.851	-5.867	-10.77	-20.181	-40.917	-34.21	-16.254	-37.787	-70
-14.84	1.079	-9.747	-29.688	-16.92	-30.112	-5.708	-21.951	-10.752	1.697	-17.698	-14.157	-22.617	-27.363	-0.505	-8.262	-34.355	-9.044	-10.766	-14.637	-16.005	-5.857	-10.627	-20.295	-40.481	-34.028	-16.173	-37.669	-70
-15.072	1.051	-9.82	-29.811	-16.887	-30.513	-5.691	-22.006	-10.772	1.635	-17.815	-14.397	-22.503	-27.208	-0.53	-8.295	-34.573	-9.162	-10.73	-14.573	-16.189	-5.935	-10.481	-20.382	-40.095	-33.949	-16.184	-37.496	-70
-15.306	0.967	-9.894	-29.933	-16.832	-30.889	-5.644	-22.024	-10.781	1.555	-17.866	-14.654	-22.414	-27.111	-0.564	-8.349	-34.818	-9.239	-10.725	-14.538	-16.402	-6.058	-10.335	-20.43	-39.779	-33.974	-16.271	-37.253	-70
-15.506	0.846	-9.974	-30.046	-16.767	-31.175	-5.59	-21.96	-10.768	1.47	-17.866	-14.871	-22.35	-27.091	-0.597	-8.423	-35.03	-9.247	-10.739	-14.486	-16.638	-6.185	-10.204	-20.419	-39.547	-34.072	-16.404	-36.951	-70
-15.673	0.712	-10.063	-30.128	-16.694	-31.339	-5.55	-21.794	-10.73	1.409	-17.845	-14.995	-22.313	-27.138	-0.62	-8.537	-35.162	-9.178	-10.754	-14.388	-16.877	-6.302	-10.115	-20.331	-39.406	-34.209	-16.551	-36.63	-70
-15.826	0.572	-10.155	-30.146	-16.612	-31.384	-5.532	-21.55	-10.66	1.407	-17.837	-14.999	-22.313	-27.209	-0.634	-8.704	-35.187	-9.053	-10.755	-14.253	-17.096	-6.422	-10.103	-20.158	-39.358	-34.365	-16.691	-36.343	-70
-15.985	0.42	-10.236	-30.075	-16.522	-31.346	-5.523	-21.291	-10.553	1.484	-17.868	-14.891	-22.367	-27.259	-0.649	-8.917	-35.104	-8.908	-10.737	-14.12	-17.273	-6.568	-10.191	-19.929	-39.394	-34.538	-16.818	-36.141	-70
-16.146	0.248	-10.297	-29.905	-16.426	-31.275	-5.502	-21.087	-10.405	1.636	-17.946	-14.71	-22.483	-27.253	-0.672	-9.137	-34.927	-8.774	-10.702	-14.036	-17.394	-6.747	-10.373	-19.708	-39.492	-34.736	-16.931	-36.044	-70
-16.287	0.053	-10.336	-29.644	-16.326	-31.208	-5.447	-20.977	-10.214	1.828	-18.058	-14.509	-22.658	-27.185	-0.696	-9.312	-34.681	-8.666	-10.656	-14.031	-17.46	-6.936	-10.617	-19.578	-39.614	-34.956	-17.033	-36.046	-70
-16.38	-0.145	-10.357	-29.322	-16.222	-31.151	-5.349	-20.947	-9.984	2.017	-18.176	-14.337	-22.872	-27.069	-0.696	-9.4	-34.395	-8.581	-10.603	-14.11	-17.486	-7.089	-10.864	-19.6	-39.716	-35.167	-17.124	-36.119	-70
-16.412	-0.314	-10.369	-28.978	-16.113	-31.083	-5.212	-20.935	-9.728	2.162	-18.278	-14.227	-23.096	-26.929	-0.636	-9.39	-34.103	-8.508	-10.544	-14.261	-17.49	-7.16	-11.06	-19.782	-39.754	-35.32	-17.21	-36.236	-70
-16.391	-0.419	-10.374	-28.662	-15.992	-30.966	-5.047	-20.862	-9.469	2.239	-18.355	-14.189	-23.309	-26.795	-0.489	-9.3	-33.831	-8.44	-10.477	-14.471	-17.487	-7.125	-11.165	-20.079	-39.704	-35.368	-17.311	-36.373	-70
-16.342	-0.433	-10.37	-28.413	-15.857	-30.775	-4.876	-20.68	-9.239	2.236	-18.413	-14.21	-23.507	-26.694	-0.255	-9.174	-33.602	-8.378	-10.403	-14.725	-17.479	-6.986	-11.172	-20.422	-39.571	-35.29	-17.453	-36.51	-70
-16.288	-0.346	-10.349	-28.259	-15.713	-30.516	-4.723	-20.393	-9.074	2.163	-18.465	-14.264	-23.705	-26.653	0.032	-9.058	-33.426	-8.329	-10.327	-15.005	-17.455	-6.764	-11.1	-20.755	-39.39	-35.102	-17.655	-36.629	-70
-16.241	-0.168	-10.3	-28.205	-15.576	-30.228	-4.617	-20.056	-9.007	2.042	-18.514	-14.314	-23.921	-26.691	0.314	-8.991	-33.302	-8.3	-10.255	-15.291	-17.401	-6.489	-10.993	-21.046	-39.208	-34.853	-17.912	-36.709	-70
-16.194	0.073	-10.21	-28.241	-15.466	-29.965	-4.575	-19.745	-9.058	1.907	-18.545	-14.322	-24.158	-26.809	0.539	-8.998	-33.221	-8.291	-10.193	-15.553	-17.309	-6.194	-10.9	-21.287	-39.066	-34.598	-18.179	-36.733	-70
-16.13	0.329	-10.067	-28.351	-15.4	-29.774	-4.598	-19.518	-9.224	1.787	-18.533	-14.26	-24.395	-26.985	0.677	-9.083	-33.175	-8.292	-10.138	-15.771	-17.187	-5.913	-10.864	-21.473	-38.984	-34.377	-18.39	-36.695	-70
-16.031	0.543	-9.872	-28.517	-15.38	-29.672	-4.663	-19.394	-9.476	1.688	-18.459	-14.116	-24.595	-27.178	0.741	-9.233	-33.158	-8.29	-10.088	-15.93	-17.057	-5.676	-10.908	-21.591	-38.958	-34.204	-18.485	-36.605	-70
-15.899	0.672	-9.641	-28.721	-15.396	-29.649	-4.734	-19.356	-9.754	1.597	-18.333	-13.904	-24.714	-27.343	0.769	-9.417	-33.171	-8.274	-10.043	-16.035	-16.944	-5.501	-11.026	-21.625	-38.971	-34.071	-18.434	-36.479	-70
-15.75	0.706	-9.4	-28.942	-15.435	-29.672	-4.777	-19.37	-9.984	1.494	-18.2	-13.661	-24.719	-27.447	0.806	-9.593	-33.218	-8.242	-10.009	-16.099	-16.87	-5.397	-11.189	-21.556	-39.005	-33.966	-18.251	-36.338	-70
-15.609	0.677	-9.18	-29.154	-15.486	-29.7	-4.782	-19.406	-10.101	1.364	-18.122	-13.435	-24.596	-27.473	0.877	-9.721	-33.295	-8.202	-10.001	-16.131	-16.841	-5.368	-11.361	-21.383	-39.049	-33.888	-17.982	-36.195	-70
-15.494	0.649	-9.001	-29.33	-15.551	-29.706	-4.761	-19.451	-10.063	1.215	-18.146	-13.259	-24.356	-27.423	0.975	-9.774	-33.392	-8.165	-10.032	-16.133	-16.851	-5.418	-11.512	-21.13	-39.096	-33.842	-17.683	-36.058	-70
-15.406	0.694	-8.877	-29.439	-15.625	-29.683	-4.741	-19.506	-9.872	1.063	-18.271	-13.137	-24.032	-27.312	1.066	-9.744	-33.494	-8.144	-10.106	-16.091	-16.887	-5.546	-11.626	-20.853	-39.137	-33.838	-17.398	-35.936	-70
-15.332	0.859	-8.807	-29.46	-15.695	-29.644	-4.739	-19.58	-9.564	0.925	-18.447	-13.039	-23.67	-27.162	1.105	-9.636	-33.59	-8.146	-10.218	-15.992	-16.943	-5.732	-11.698	-20.624	-39.149	-33.873	-17.15	-35.844	-70
-15.255	1.151	-8.787	-29.378	-15.74	-29.617	-4.757	-19.68	-9.204	0.814	-18.596	-12.919	-23.315	-26.994	1.056	-9.458	-33.685	-8.169	-10.354	-15.838	-17.022	-5.927	-11.734	-20.504	-39.102	-33.929	-16.942	-35.809	-70
-15.168	1.534	-8.801	-29.189	-15.744	-29.626	-4.783	-19.798	-8.871	0.738	-18.649	-12.749	-23.01	-26.835	0.906	-9.224	-33.793	-8.199	-10.502	-15.655	-17.131	-6.063	-11.745	-20.522	-38.968	-33.982	-16.767	-35.854	-70
-15.077	1.939	-8.833	-28.897	-15.712	-29.675	-4.796	-19.917	-8.638	0.709	-18.576	-12.541	-22.787	-26.708	0.658	-8.953	-33.927	-8.217	-10.652	-15.48	-17.275	-6.075	-11.749	-20.655	-38.741	-34.01	-16.618	-35.988	-70
-15.001	2.283	-8.866	-28.515	-15.678	-29.744	-4.778	-20.017	-8.554	0.737	-18.393	-12.35	-22.668	-26.631	0.334	-8.677	-34.088	-8.203	-10.786	-15.345	-17.44	-5.931	-11.772	-20.851	-38.453	-34.014	-16.493	-36.193	-70
-14.949	2.497	-8.885	-28.072	-15.68	-29.794	-4.712	-20.082	-8.633	0.817	-18.144	-12.241	-22.66	-26.614	-0.031	-8.434	-34.262	-8.156	-10.876	-15.263	-17.596	-5.647	-11.839	-21.053	-38.17	-34.016	-16.394	-36.432	-70
-14.919	2.546	-8.883	-27.609	-15.741	-29.798	-4.586	-20.111	-8.852	0.925	-17.881	-12.255	-22.746	-26.654	-0.396	-8.254	-34.433	-8.092	-10.891	-15.223	-17.7	-5.282	-11.963	-21.226	-37.968	-34.047	-16.322	-36.662	-70
-14.891	2.44	-8.856	-27.185	-15.852	-29.747	-4.395	-20.117	-9.169	1.021	-17.638	-12.38	-22.881	-26.739	-0.716	-8.149	-34.584	-8.05	-10.806	-15.212	-17.713	-4.918	-12.13	-21.357	-37.906	-34.13	-16.267	-36.842	-70
-14.842	2.227	-8.802	-26.856	-15.991	-29.665	-4.147	-20.125	-9.54	1.061	-17.424	-12.559	-23.007	-26.85	-0.95	-8.105	-34.702	-8.07	-10.625	-15.226	-17.619	-4.63	-12.301	-21.45	-37.997	-34.261	-16.217	-36.947	-70
-14.756	1.972	-8.719	-26.658	-16.142	-29.594	-3.869	-20.16	-9.933	1.014	-17.227	-12.722	-23.068	-26.971	-1.076	-8.095	-34.773	-8.181	-10.381	-15.277	-17.444	-4.456	-12.426	-21.517	-38.213	-34.405	-16.166	-36.969	-70
-14.631	1.727	-8.602	-26.604	-16.307	-29.58	-3.604	-20.245	-10.322	0.879	-17.033	-12.817	-23.04	-27.081	-1.095	-8.097	-34.777	-8.389	-10.117	-15.376	-17.246	-4.394	-12.461	-21.573	-38.492	-34.506	-16.12	-36.917	-70
-14.476	1.523	-8.451	-26.674	-16.502	-29.657	-3.401	-20.388	-10.679	0.686	-16.838	-12.831	-22.941	-27.161	-1.03	-8.106	-34.698	-8.673	-9.867	-15.525	-17.092	-4.411	-12.39	-21.628	-38.767	-34.516	-16.1	-36.806	-70
-14.296	1.366	-8.273	-26.83	-16.734	-29.839	-3.303	-20.586	-10.973	0.501	-16.653	-12.782	-22.82	-27.198	-0.919	-8.137	-34.54	-8.987	-9.645	-15.703	-17.028	-4.462	-12.226	-21.677	-38.988	-34.412	-16.123	-36.653	-70
-14.089	1.251	-8.081	-27.021	-16.988	-30.115	-3.338	-20.815	-11.178	0.398	-16.492	-12.7	-22.729	-27.183	-0.805	-8.205	-34.323	-9.272	-9.45	-15.878	-17.058	-4.517	-12.011	-21.688	-39.133	-34.207	-16.186	-36.464	-70
-13.847	1.171	-7.901	-27.195	-17.228	-30.452	-3.508	-21.04	-11.284	0.433	-16.361	-12.614	-22.705	-27.117	-0.722	-8.309	-34.078	-9.467	-9.281	-16.021	-17.148	-4.568	-11.811	-21.612	-39.212	-33.937	-16.263	-36.23	-70
-13.571	1.12	-7.762	-27.299	-17.419	-30.8	-3.791	-21.229	-11.297	0.612	-16.258	-12.538	-22.752	-27.016	-0.692	-8.423	-33.837	-9.524	-9.143	-16.12	-17.255	-4.633	-11.698	-21.406	-39.258	-33.649	-16.313	-35.937	-70
-13.28	1.093	-7.692	-27.291	-17.54	-31.106	-4.144	-21.358	-11.248	0.888	-16.181	-12.483	-22.846	-26.91	-0.711	-8.504	-33.626	-9.417	-9.043	-16.184	-17.346	-4.735	-11.73	-21.062	-39.299	-33.391	-16.308	-35.578	-70
-13.016	1.089	-7.709	-27.148	-17.596	-31.331	-4.508	-21.418	-11.178	1.178	-16.135	-12.456	-22.948	-26.84	-0.753	-8.52	-33.465	-9.143	-8.978	-16.23	-17.412	-4.887	-11.932	-20.621	-39.352	-33.21	-16.242	-35.164	-70
-12.83	1.109	-7.813	-26.879	-17.604	-31.452	-4.828	-21.412	-11.137	1.402	-16.133	-12.47	-23.023	-26.851	-0.777	-8.477	-33.367	-8.725	-8.931	-16.268	-17.455	-5.086	-12.286	-20.159	-39.413	-33.143	-16.134	-34.728	-70
-12.765	1.153	-7.988	-26.523	-17.578	-31.459	-5.061	-21.351	-11.16	1.518	-16.192	-12.542	-23.045	-26.969	-0.749	-8.414	-33.339	-8.198	-8.893	-16.297	-17.476	-5.308	-12.739	-19.756	-39.469	-33.203	-16.019	-34.333	-70
-12.84	1.219	-8.212	-26.141	-17.517	-31.357	-5.188	-21.248	-11.253	1.537	-16.32	-12.686	-23.01	-27.189	-0.664	-8.386	-33.379	-7.618	-8.868	-16.311	-17.471	-5.522	-13.22	-19.473	-39.51	-33.375	-15.935	-34.053	-70
-13.041	1.298	-8.463	-25.8	-17.409	-31.15	-5.217	-21.12	-11.384	1.503	-16.522	-12.905	-22.936	-27.475	-0.551	-8.423	-33.47	-7.05	-8.883	-16.308	-17.434	-5.696	-13.665	-19.336	-39.538	-33.615	-15.913	-33.957	-70
-13.323	1.381	-8.73	-25.556	-17.248	-30.848	-5.176	-20.982	-11.495	1.468	-16.795	-13.193	-22.853	-27.782	-0.463	-8.51	-33.585	-6.557	-8.969	-16.301	-17.373	-5.806	-14.027	-19.346	-39.559	-33.867	-15.971	-34.08	-70
[truncated: 773 more rows]

## Sheet: Figure 2f
-70 to -40 mV		-70 to -35		70 to -30					Indexed by cone tpsc peak amplitude				Fit comparison (limited to positive cone pA values, % sampled calculations include negative cone pA values)
[truncated: 156 more rows]

[truncated: 30 more sheets: Figure 2g, Figure 3a, Figure 3b, Figure 3d-g, Figure 4a, Figure 4b, Figure 5a-d, Figure 5e-h, Figure 6, Figure 7, Figure 8, Figure 9, Figure 10, Sup Fig 1, Sup Fig 2a-b, Sup fig 2c-d, Sup fig 2e-f, Sup Fig 3, Sup Fig 4a-e, Sup Fig 4f-i …]
